# Supplementary material for: Versatile synthesis of pathogen specific bacterial cell wall building blocks
Source: Royal Society of Chemistry journal article supplement (doi:10.1039/d2ra01915a), 2022-01-01

## Electronic Supplementary Information (ESI)

# Versatile Synthesis of Pathogen Specific Bacterial Cell Wall Building Blocks †

Lukas Martin Wingen,<sup>a,e</sup> Christina Braun,<sup>a</sup> Marvin Rausch,<sup>b,c</sup> Harald Gross,<sup>d</sup> Tanja Schneider,<sup>b</sup> and Dirk Menche<sup>a,\*</sup>

*a* Kekulé Institute of Organic Chemistry and Biochemistry, University of Bonn, D-53121 Bonn, Germany, EU.

*b* Institute for Pharmaceutical Microbiology, University Clinic Bonn, University of Bonn, D-53115 Bonn, Germany, EU.

*c* German Center for Infection Research (DZIF), partner site Bonn-Cologne.

*d* Pharmaceutical Institute, Dept. of Pharmaceutical Biology, University of Tübingen, D-72076 Tübingen, Germany.

*e* Present address: Boehringer Ingelheim, Ingelheim, Germany.

E-mail: [dirk.menche@uni-bonn.de](mailto:dirk.menche@uni-bonn.de)

## Contents

|                                                                                                           |    |
|-----------------------------------------------------------------------------------------------------------|----|
| 1. Table of NMR data of 3-lipid I and 3-lipid II analogs.                                                 | S2 |
| 2. Temperature dependency of <sup>1</sup> H and <sup>31</sup> P NMR spectra of farnesyl lipid I analog 3. | S3 |
| 3. Synthesis of compound 19.                                                                              | S3 |
| 4. Copies of <sup>1</sup> H and <sup>13</sup> C NMR spectra.                                              | S5 |

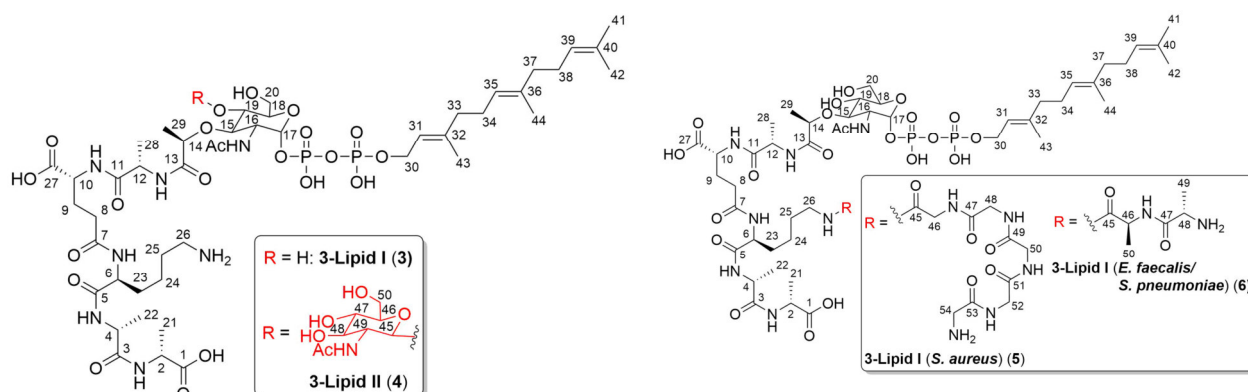

**Table S1.** NMR data for 3-lipid I (**3**), 3-lipid II (**4**), 3-lipid I (*S. aureus*, **5**) and 3-lipid I (*E. faecalis*, *S. pneumoniae*, **6**) in D<sub>2</sub>O.<sup>a</sup>

| position             | 3-lipid I [ <b>3</b> ] |                                    | 3-lipid II [ <b>4</b> ] |                                    | 3-lipid I ( <i>S. aureus</i> ) [ <b>5</b> ] |                                    | 3-lipid I ( <i>S. pneumoniae</i> , <i>E. faecalis</i> ) [ <b>6</b> ] |                                    |
|----------------------|------------------------|------------------------------------|-------------------------|------------------------------------|---------------------------------------------|------------------------------------|----------------------------------------------------------------------|------------------------------------|
|                      | $\delta_C$             | $\delta_H$ mult. ( <i>J</i> in Hz) | $\delta_C$              | $\delta_H$ mult. ( <i>J</i> in Hz) | $\delta_C$                                  | $\delta_H$ mult. ( <i>J</i> in Hz) | $\delta_C$                                                           | $\delta_H$ mult. ( <i>J</i> in Hz) |
| 1                    | 179.8                  | -                                  | 179.8                   | -                                  | 179.9                                       | -                                  | 181.4                                                                | -                                  |
| 2                    | 51.0                   | 4.20 – 4.10 m                      | 51.0                    | 4.15 – 4.12 m                      | 51.0                                        | 4.16 – 4.10 m                      | 51.1                                                                 | 4.19 – 4.14 m                      |
| 3                    | 174.0                  | -                                  | 174.0                   | -                                  | 174.0                                       | -                                  | 174.1                                                                | -                                  |
| 4                    | 78.0                   | 4.35 q (7.2)                       | 49.6                    | 4.35 q (7.1)                       | 49.8                                        | 4.30 q (7.2)                       | 50.2                                                                 | 4.31 – 4.29 m                      |
| 5                    | 174.1                  | -                                  | 174.1                   | -                                  | 174.2                                       | -                                  | 174.8                                                                | -                                  |
| 6                    | 54.2                   | 4.25 – 4.22 m                      | 54.3                    | 4.24 – 4.20 m/                     | 54.3                                        | 4.26 – 4.17 m                      | 54.3                                                                 | 4.29 – 4.24 m                      |
| 7                    | 175.7                  | -                                  | 175.7                   | -                                  | 175.6                                       | -                                  | 175.8                                                                | -                                  |
| 8                    | 31.7                   | 2.32 t (7.8)                       | 31.8                    | 2.34 – 2.33 m                      | 31.8                                        | 2.37 – 2.28 m                      | 31.9                                                                 | 2.33 – 2.28 m                      |
| 9                    | 28.1                   | 2.20 – 2.15 m/                     | 28.2                    | 2.19 – 2.17 m/                     | 28.1                                        | 2.20 – 2.16 m/                     | 28.2                                                                 | 2.20 – 2.14 m/                     |
|                      |                        | 1.93 – 1.89 m                      |                         | 1.93 – 1.89 m                      |                                             | 1.93 – 1.88 m                      |                                                                      | 1.93 – 1.88 m                      |
| 10                   | 54.2                   | 4.20 – 4.10 m                      | 53.7                    | 4.24 – 4.20 m/                     | 54.3                                        | 4.26 – 4.17 m                      | 54.3                                                                 | 4.29 – 4.24 m                      |
| 11                   | 175.8                  | -                                  | 175.7                   | -                                  | 175.5                                       | -                                  | 175.9                                                                | -                                  |
| 12                   | 49.9                   | 4.29 q (7.2)                       | 50.0                    | 4.32 – 4.27 m                      | 78.0                                        | 4.26 – 4.17 m                      | 78.2                                                                 | 4.29 – 4.24 m                      |
| 13                   | 173.6                  | -                                  | 173.6                   | -                                  | 173.6                                       | -                                  | 173.7                                                                | -                                  |
| 14                   | 49.6                   | 4.25 – 4.22 m                      | 78.4                    | 4.32 – 4.27 m                      | 49.5                                        | 4.37 q (7.2)                       | 49.5                                                                 | 4.36 q (7.2)                       |
| 15                   | 79.9                   | 3.80 dd (9.6, 9.6)                 | 77.9                    | 3.86 – 3.81 m                      | 79.9                                        | 3.80 dd (9.6, 9.6)                 | 79.9                                                                 | 3.80 dd (9.7, 9.7)                 |
| 16                   | 53.4                   | 4.20 – 4.10 m                      | 53.5                    | 4.15 – 4.12 m                      | 53.4                                        | 4.16 – 4.10 m                      | 53.3                                                                 | 4.19 – 4.14 m                      |
| NHAc-C=O             | 174.1                  | -                                  | 174.4                   | -                                  | 174.1                                       | -                                  | 174.1                                                                | -                                  |
| NHAc-C=O             | -                      | -                                  | 174.2                   | -                                  | -                                           | -                                  | -                                                                    | -                                  |
| NHAc-CH <sub>3</sub> | 22.2                   | 2.02 s                             | 22.2                    | 2.01 s                             | 22.4                                        | 2.02 s                             | 22.3                                                                 | 2.00 s                             |
| NHAc-CH <sub>3</sub> | -                      | -                                  | 22.1                    | 2.07 s                             | -                                           | -                                  | -                                                                    | -                                  |
| 17                   | 94.7                   | 5.50 – 5.47 m                      | 94.2                    | 5.50 – 5.47 m                      | 94.7                                        | 5.50 – 5.48 m                      | 94.8                                                                 | 5.50 – 5.46 m                      |
| 18                   | 73.0                   | 3.98 – 3.96 m                      | 73.8                    | 3.98 – 3.89 m                      | 73.0                                        | 3.98 – 3.96 m                      | 73.1                                                                 | 3.99 – 3.94 m                      |
| 19                   | 68.0                   | 3.66 dd (9.6, 9.6)                 | 72.4                    | 3.98 – 3.89 m                      | 68.0                                        | 3.66 dd (9.6, 9.6)                 | 68.2                                                                 | 3.64 pt (9.7)                      |
| 20                   | 60.3                   | 3.92 – 3.84 m                      | 61.1/                   | 3.98 – 3.89 m/                     | 60.3                                        | 3.90 – 3.83 m                      | 58.2                                                                 | 3.91 – 3.85 m                      |
|                      |                        |                                    | 59.7                    | 3.79 – 3.74 m                      |                                             |                                    |                                                                      |                                    |
| 21                   | 17.4                   | 1.35 d (7.2)                       | 17.4                    | 1.35 d (7.2)                       | 17.4                                        | 1.35 d (7.2)                       | 17.5                                                                 | 1.34 d (7.1)                       |
| 22                   | 18.6                   | 1.39 d (7.2)                       | 18.7                    | 1.40 d (7.2)                       | 16.9                                        | 1.46 d (7.2)                       | 17.0                                                                 | 1.45 d (7.2)                       |
| 23                   | 30.5                   | 1.87 – 1.77 m                      | 30.5                    | 1.86 – 1.82 m/                     | 30.7                                        | 1.83 – 1.73 m                      | 30.7                                                                 | 1.83 – 1.76 m                      |
|                      |                        |                                    |                         | 1.81 – 1.79 m                      |                                             |                                    |                                                                      |                                    |
| 24                   | 22.0                   | 1.52 – 1.47 m                      | 22.2                    | 1.45 – 1.39 m                      | 22.2                                        | 1.56 – 1.51 m                      | 22.2                                                                 | 1.53 – 1.50 m                      |
| 25                   | 26.3                   | 1.72 – 1.70 m                      | 26.5                    | 1.69 – 1.66 m                      | 27.8                                        | 1.72 – 1.70 m                      | 27.7                                                                 | 1.72 – 1.70 m                      |
| 26                   | 39.1                   | 3.02 t (7.5)                       | 39.2                    | 2.97 t (7.0)                       | 39.0                                        | 3.23 t (6.7)                       | 38.9                                                                 | 3.26 – 3.23 m                      |
| 27                   | 177.6                  | -                                  | 177.6                   | -                                  | 177.7                                       | -                                  | 177.9                                                                | -                                  |
| 28                   | 16.8                   | 1.46 d (7.3)                       | 16.9                    | 1.47 d (6.9)                       | 18.7                                        | 1.43 d (6.8)                       | 18.7                                                                 | 1.42 d (6.9)                       |
| 29                   | 16.5                   | 1.43 d (6.8)                       | 16.5                    | 1.46 d (6.8)                       | 16.6                                        | 1.38 d (7.2)                       | 16.7                                                                 | 1.38 d (7.1)                       |
| 30                   | 63.1                   | 4.54 – 4.49 m                      | 63.1                    | 4.51 – 4.49 m                      | 63.2                                        | 4.54 – 4.49 m                      | 63.2                                                                 | 4.52 – 4.47 m                      |
| 31                   | 119.3                  | 5.46 t (7.1)                       | 119.3                   | 5.46 t (6.9)                       | 119.3                                       | 5.46 t (6.7)                       | 119.3                                                                | 5.46 t (6.8)                       |
| 32                   | 143.2                  | -                                  | 143.2                   | -                                  | 143.2                                       | -                                  | 143.2                                                                | -                                  |
| 33                   | 38.8                   | 2.15 – 2.11 m                      | 38.8                    | 2.14 – 2.11 m                      | 38.8                                        | 2.15 – 2.11 m                      | 38.9                                                                 | 2.15 – 2.11 m                      |
| 34                   | 25.5                   | 2.20 – 2.15 m                      | 25.6                    | 2.19 – 2.17 m                      | 25.5                                        | 2.20 – 2.16 m                      | 25.5                                                                 | 2.20 – 2.14 m                      |

| position | 3-lipid I [3] |                                    | 3-lipid II [4] |                                    | 3-lipid I ( <i>S. aureus</i> ) [5] |                                    | 3-lipid I ( <i>S. pneumoniae</i> , <i>E. faecalis</i> ) [6] |                                    |
|----------|---------------|------------------------------------|----------------|------------------------------------|------------------------------------|------------------------------------|-------------------------------------------------------------|------------------------------------|
|          | $\delta_C$    | $\delta_H$ mult. ( <i>J</i> in Hz) | $\delta_C$     | $\delta_H$ mult. ( <i>J</i> in Hz) | $\delta_C$                         | $\delta_H$ mult. ( <i>J</i> in Hz) | $\delta_C$                                                  | $\delta_H$ mult. ( <i>J</i> in Hz) |
| 35       | 124.2         | 5.22 t (6.5)                       | 124.2          | 5.23 t (6.4)                       | 124.2                              | 5.22 t (6.7)                       | 124.4                                                       | 5.23 t (6.8)                       |
| 36       | 136.7         | -                                  | 136.7          | -                                  | 136.7                              | -                                  | 136.8                                                       | -                                  |
| 37       | 38.8          | 2.04 t (7.1)                       | 38.8           | 2.05 t (7.7)                       | 38.8                               | 2.04 t (7.1)                       | 38.9                                                        | 2.02 t (7.5)                       |
| 38       | 25.8          | 2.15 – 2.11 m                      | 25.8           | 2.14 – 2.11 m                      | 25.8                               | 2.15 – 2.11 m                      | 25.9                                                        | 2.15 – 2.11 m                      |
| 39       | 124.4         | 5.20 t (7.8)                       | 124.4          | 5.20 t (6.4)                       | 124.4                              | 5.20 t (6.7)                       | 124.5                                                       | 5.21 – 5.16 m                      |
| 40       | 133.4         | -                                  | 133.5          | -                                  | 133.4                              | -                                  | 133.4                                                       | -                                  |
| 41       | -             | 1.64 s                             | 17.0           | 1.64 s                             | 17.0                               | 1.64 s                             | 17.0                                                        | 1.64 s                             |
| 42       | 24.9          | 1.70 s                             | 24.9           | 1.71 s                             | 24.9                               | 1.71 s                             | 25.0                                                        | 1.70 s                             |
| 43       | 15.7          | 1.74 s                             | 15.7           | 1.74 s                             | 15.7                               | 1.74 s                             | 15.7                                                        | 1.73 s                             |
| 44       | 15.3          | 1.64 s                             | 15.3           | 1.64 s                             | 15.3                               | 1.64 s                             | 15.3                                                        | 1.63 s                             |
| 45       | -             | -                                  | 100.1          | 4.63 d (8.3)                       | 171.0                              | 3.82 s                             | 172.1                                                       | -                                  |
| 46       | -             | -                                  | 75.9           | 3.46 – 3.41 m                      | 42.5                               | 3.91 s                             | 52.2                                                        | 4.23 – 4.21 m                      |
| 47       | -             | -                                  | 70.3           | 3.46 – 3.41 m                      | 172.2/172.1/<br>172.0              | -                                  | 172.0                                                       | -                                  |
| 48       | -             | -                                  | 74.0           | 3.58 pt (8.6, 8.6)                 | 42.6/42.5                          | 4.03 s/ 4.01 s                     | 49.9                                                        | 4.21 – 4.19 m                      |
| 49       | -             | -                                  | 56.1           | 3.79 – 3.74 m                      | 172.2/172.1/<br>172.0              | -                                  | 16.6                                                        | 1.37 d (7.2)                       |
| 50       | -             | -                                  | 61.1/<br>59.7  | 3.98 – 3.89 m/<br>3.79 – 3.74 m    | 42.6/42.5                          | 4.03 s/ 4.01 s                     | 19.2                                                        | 1.55 d (7.1)                       |
| 51       | -             | -                                  | -              | -                                  | 172.2/172.1/<br>172.0              | -                                  | -                                                           | -                                  |
| 52       | -             | -                                  | -              | -                                  | 42.4                               | 4.08 s                             | -                                                           | -                                  |
| 53       | -             | -                                  | -              | -                                  | 169.9                              | -                                  | -                                                           | -                                  |
| 54       | -             | -                                  | -              | -                                  | 41.2                               | -                                  | -                                                           | -                                  |

<sup>a</sup> Recorded at 700 MHz and 500 MHz (<sup>1</sup>H) and 150 MHz (<sup>13</sup>C).

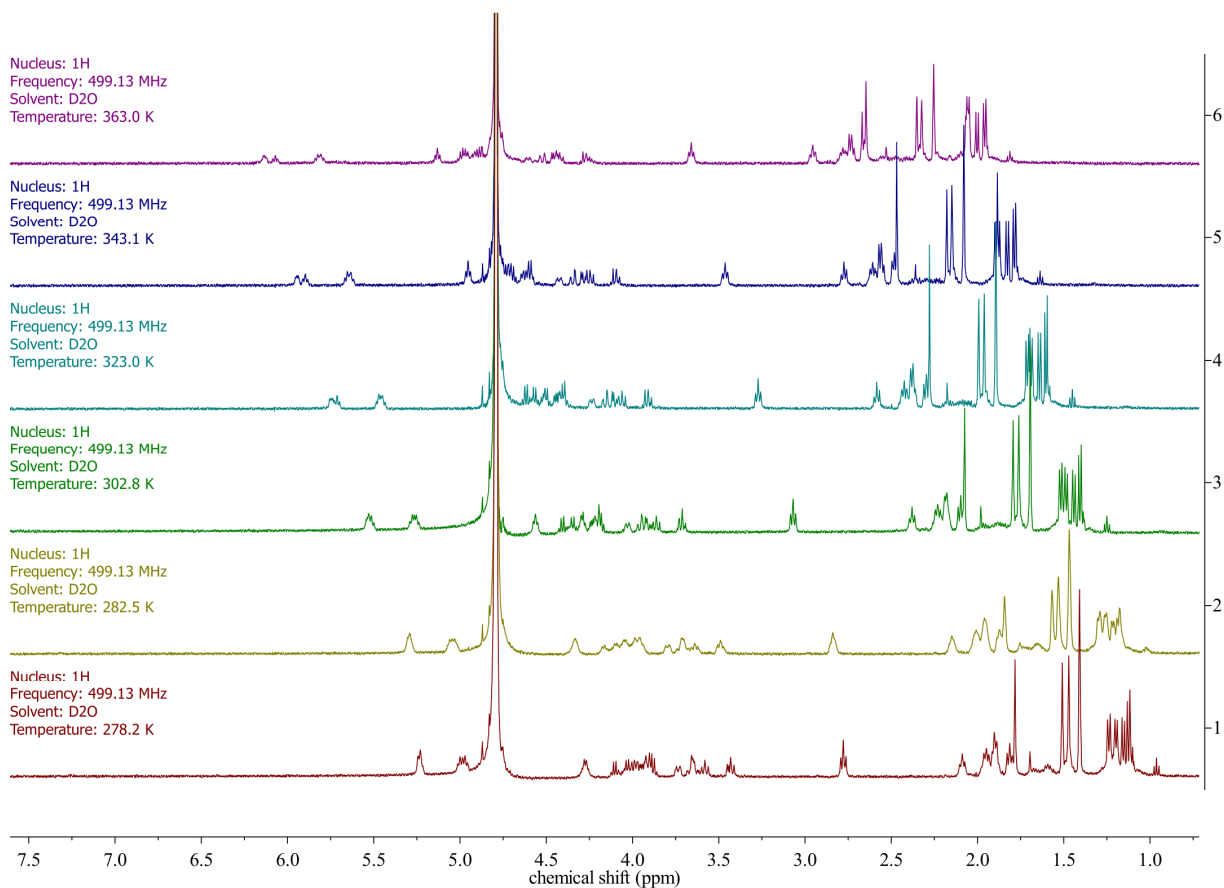

**Figure S1:** Temperature dependency of <sup>1</sup>H-NMR spectra of farnesyl lipid I analog **3**.

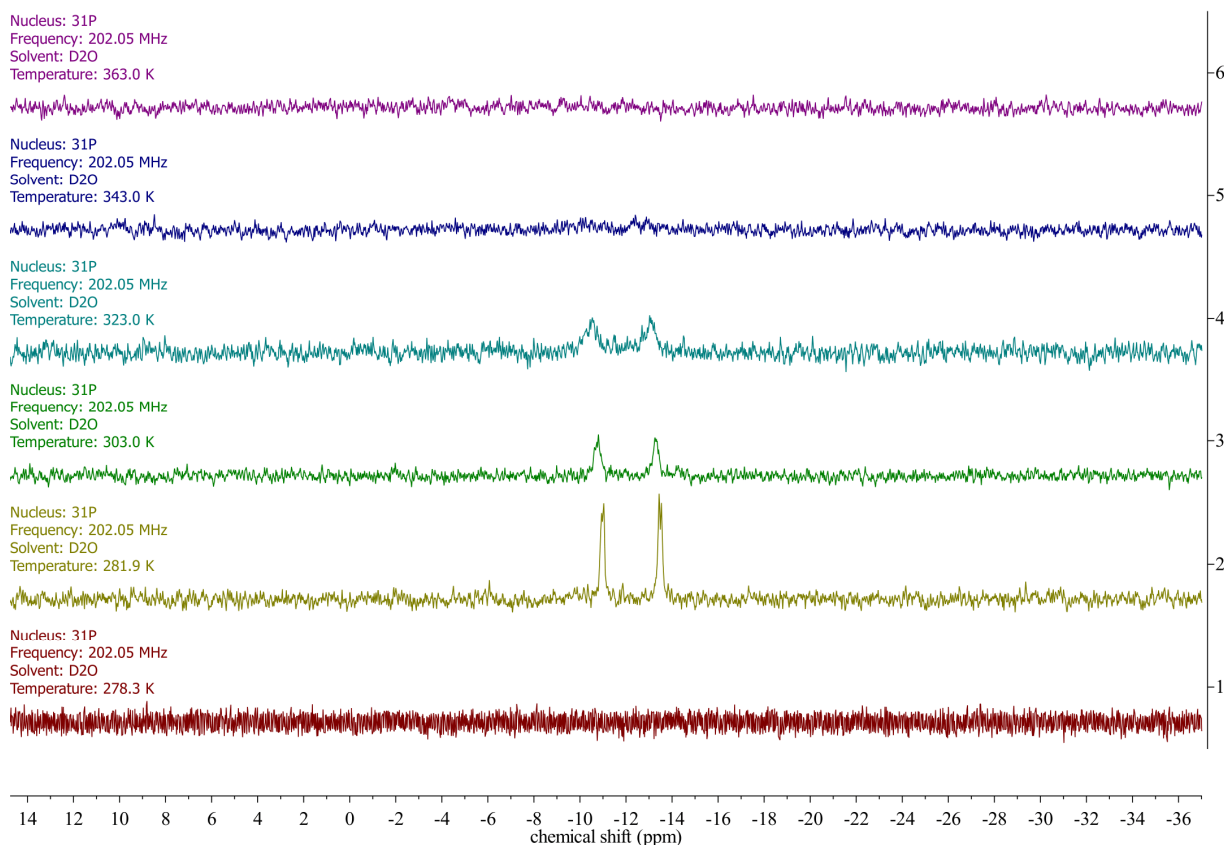

**Figure S2:** Temperature dependency of  $^{31}\text{P}$ -NMR spectra of farnesyl lipid I analog **3**.

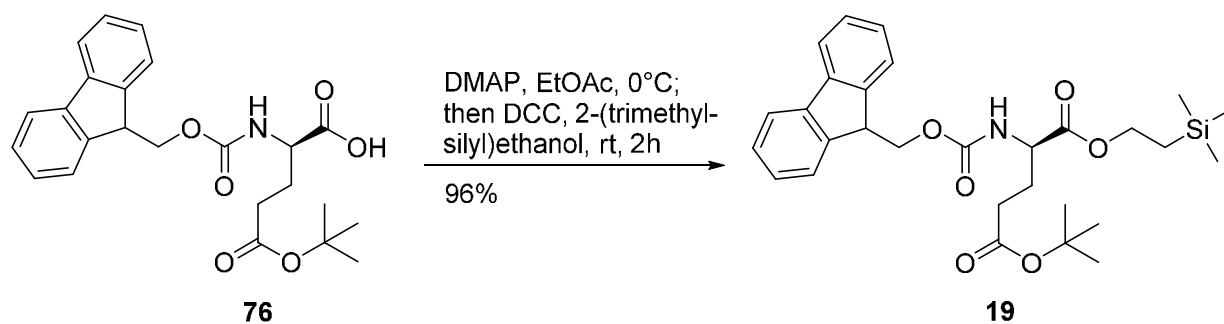

Fmoc-D-Glu(O-tBu)-OH (1.50 g, 3.53 mmol) and DMAP (86.1 mg, 705  $\mu\text{mol}$ ) were dissolved in 20 mL EtOAc and cooled to 0 °C. 2-(trimethylsilyl)ethanol (758  $\mu\text{L}$ , 5.29 mmol) and DCC (1 M in  $\text{CH}_2\text{Cl}_2$ , 4.23 mL, 4.23 mmol) were added. After stirring for 2 h at rt, the reaction was filtered over celite and the residue was washed with EtOAc (2 x 20 mL). The solvent was removed under reduced pressure and the crude product was purified by flash chromatography (15% EtOAc/cyclohexane) to yield 1.77 g (3.37 mmol, 96%) of a white solid.



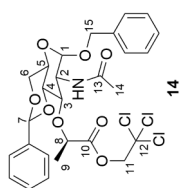

Nucleus:  $^1\text{H}$   
 Frequency: 499.13 MHz  
 Solvent:  $\text{CDCl}_3$   
 Temperature: 297.9 K

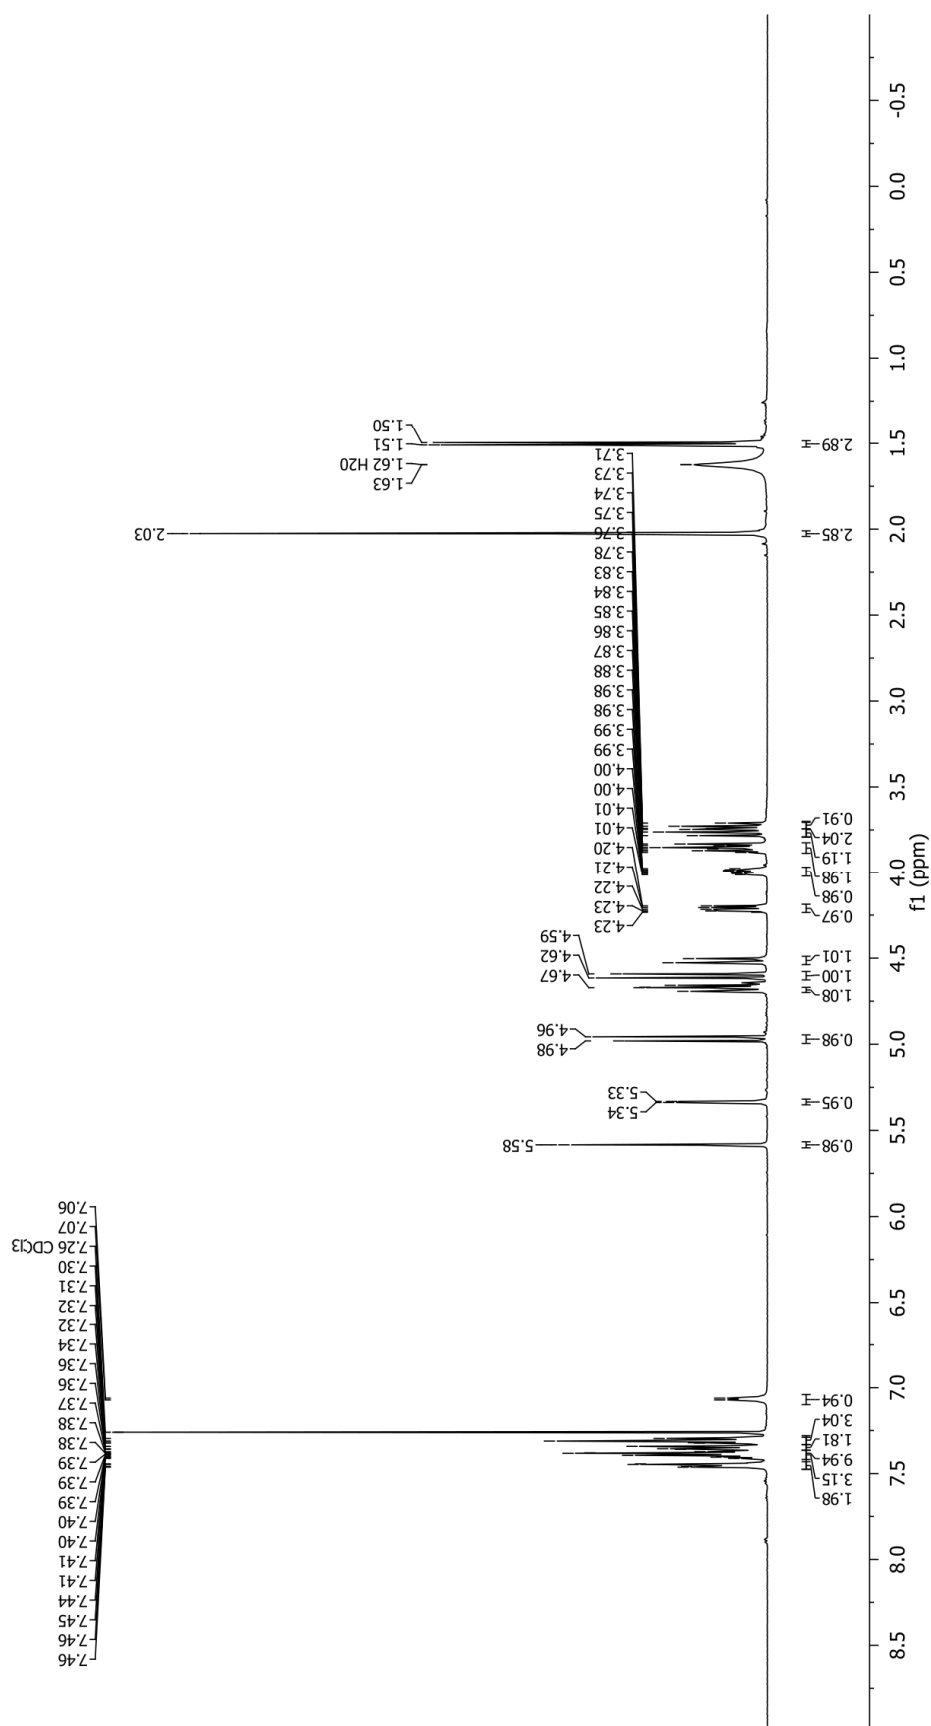

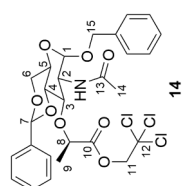

Nucleus:  $^{13}\text{C}$   
 Frequency: 125.52 MHz  
 Solvent:  $\text{CDCl}_3$   
 Temperature: 297.9 K

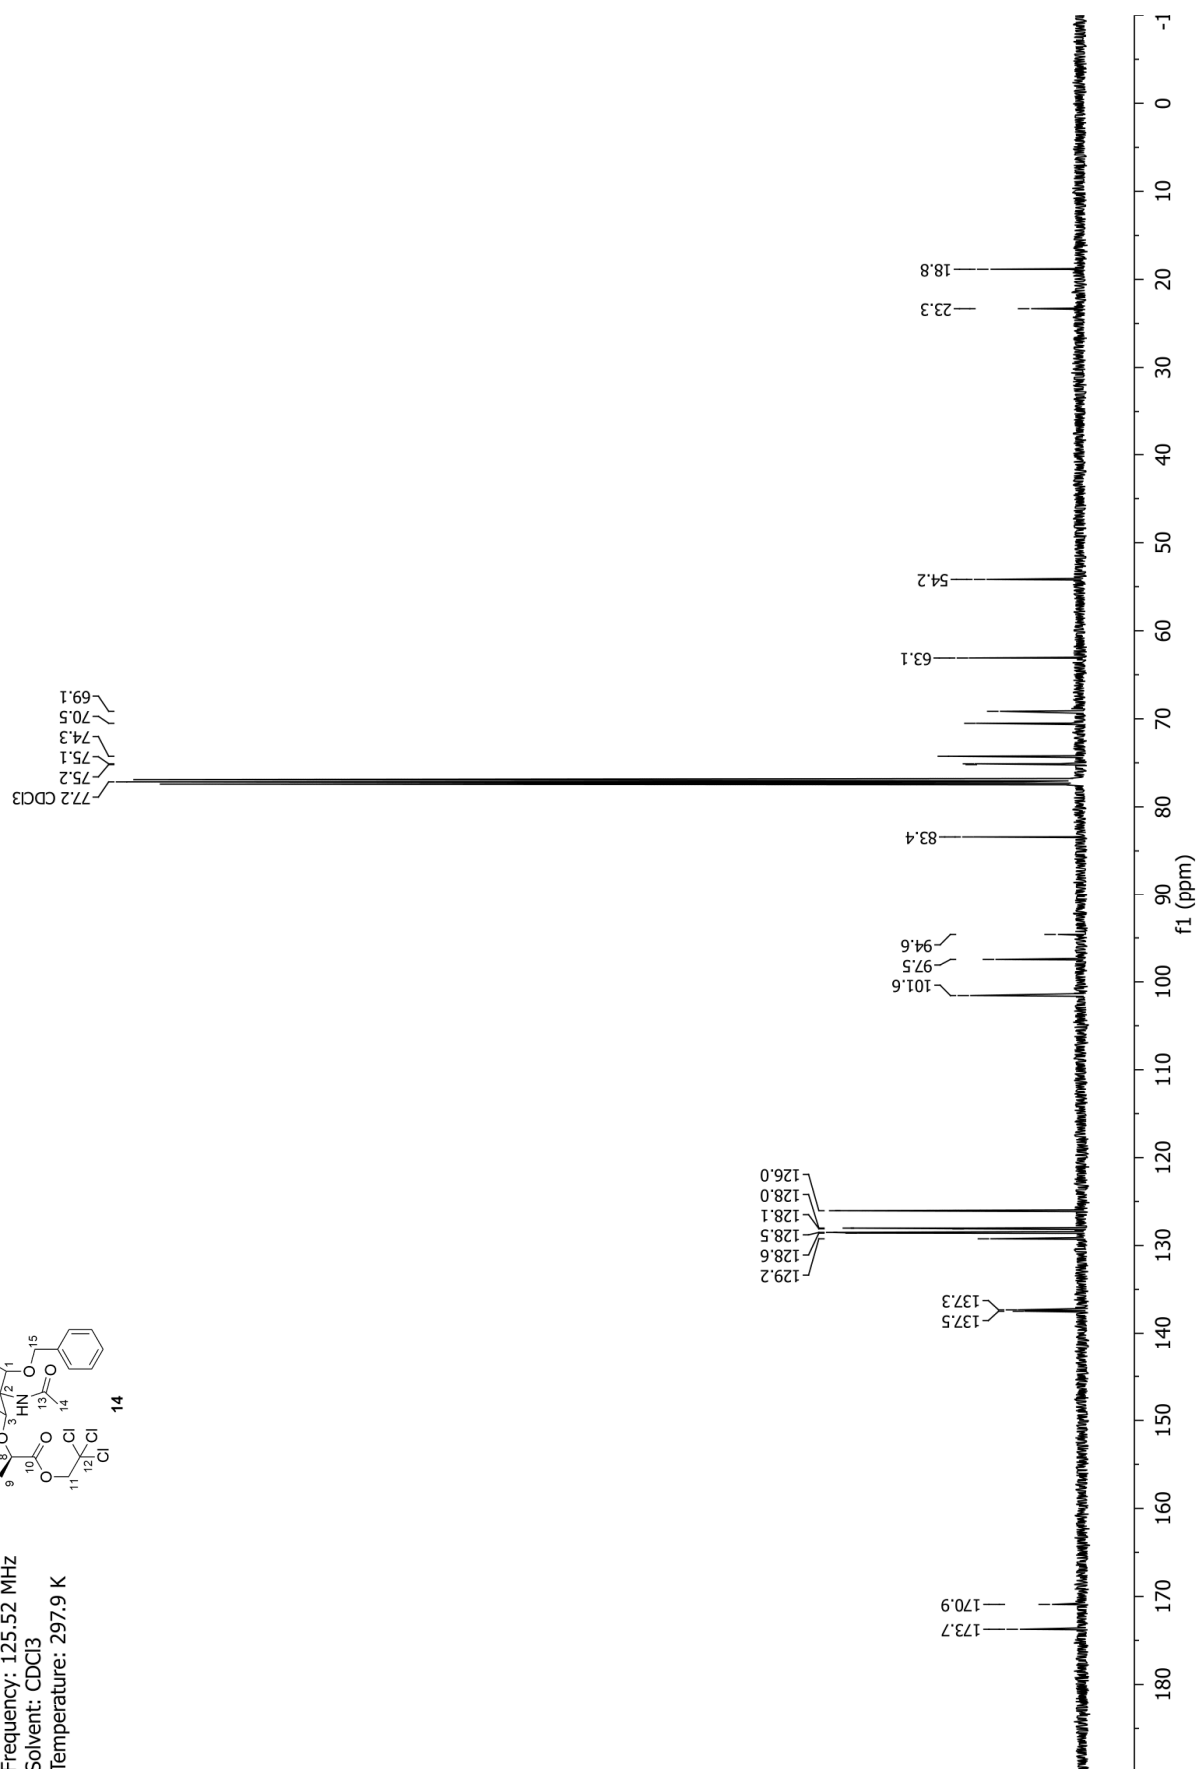

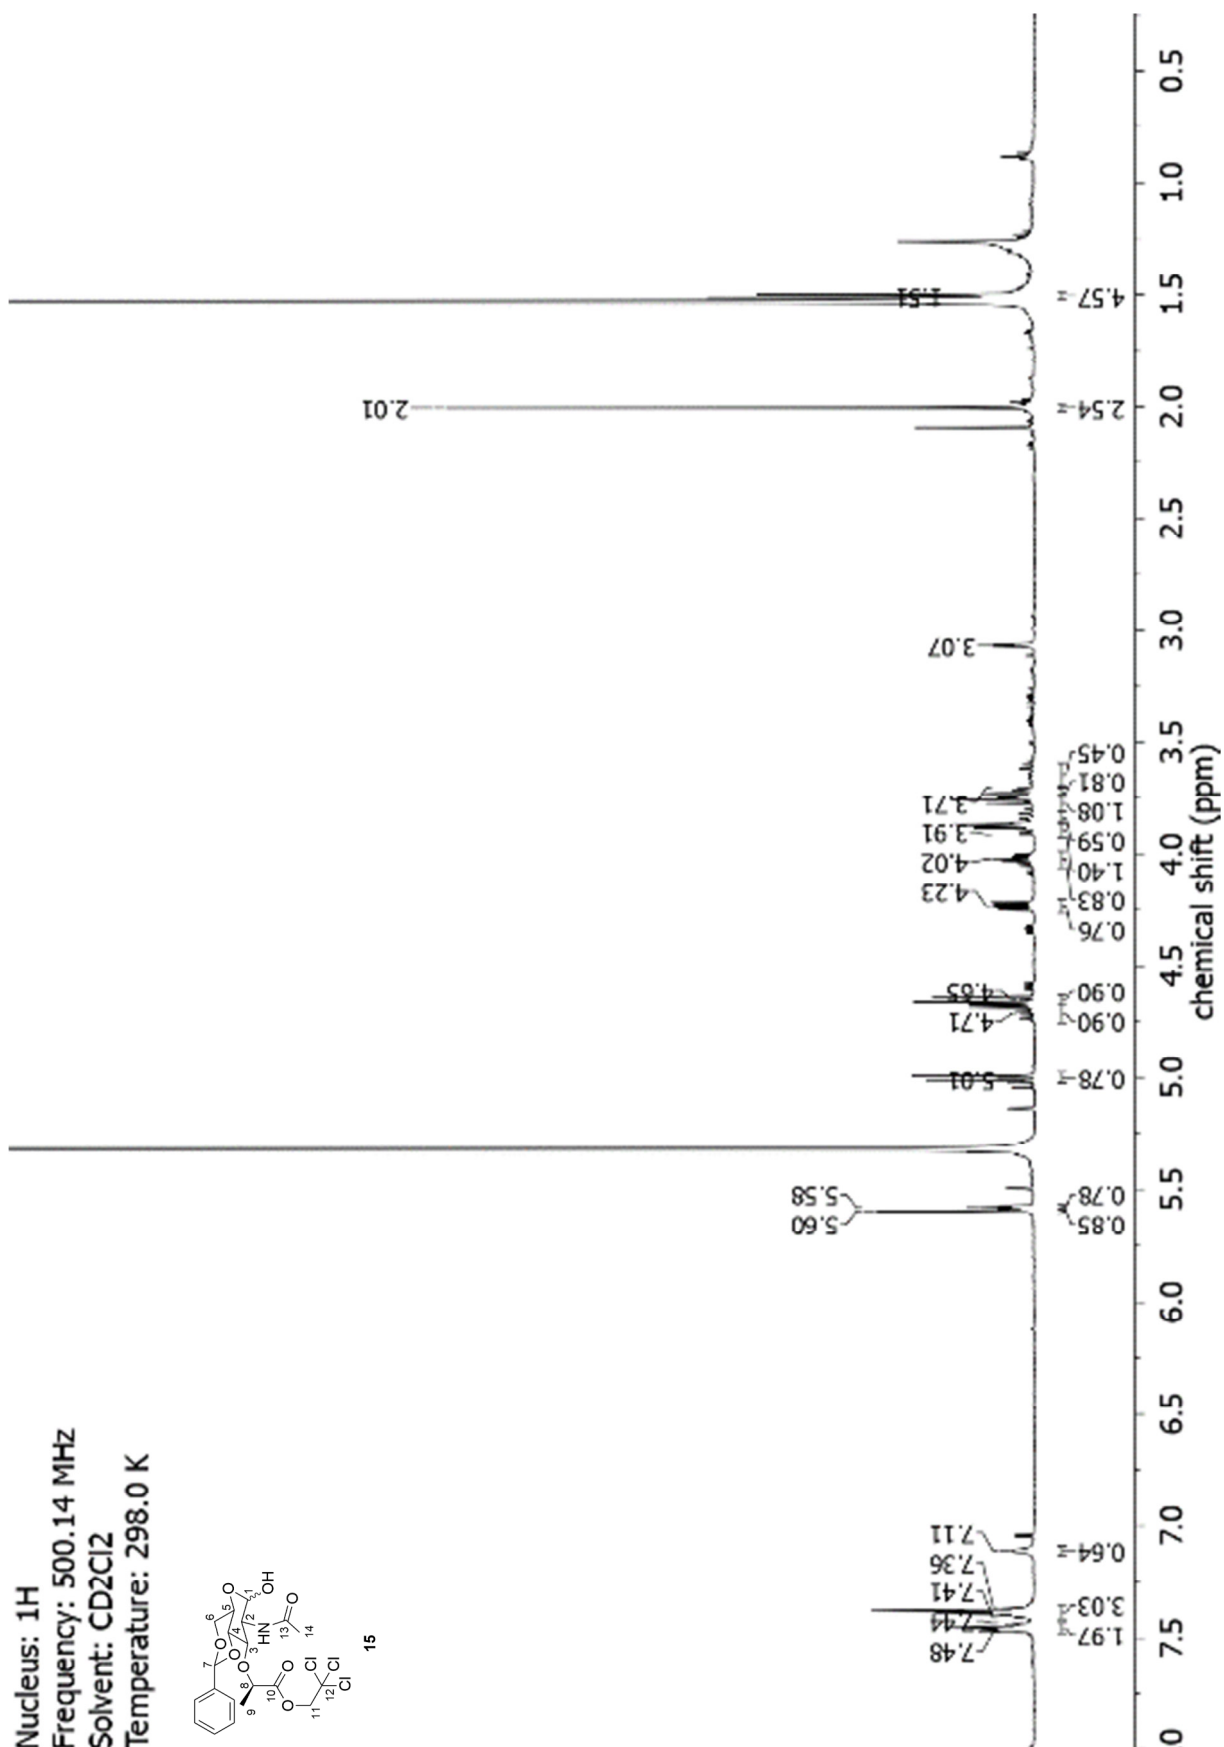

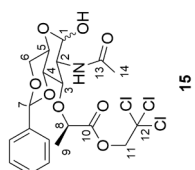

Nucleus:  $^{13}\text{C}$   
 Frequency: 176.14 MHz  
 Solvent:  $\text{CD}_2\text{Cl}_2$   
 Temperature: 298.0 K

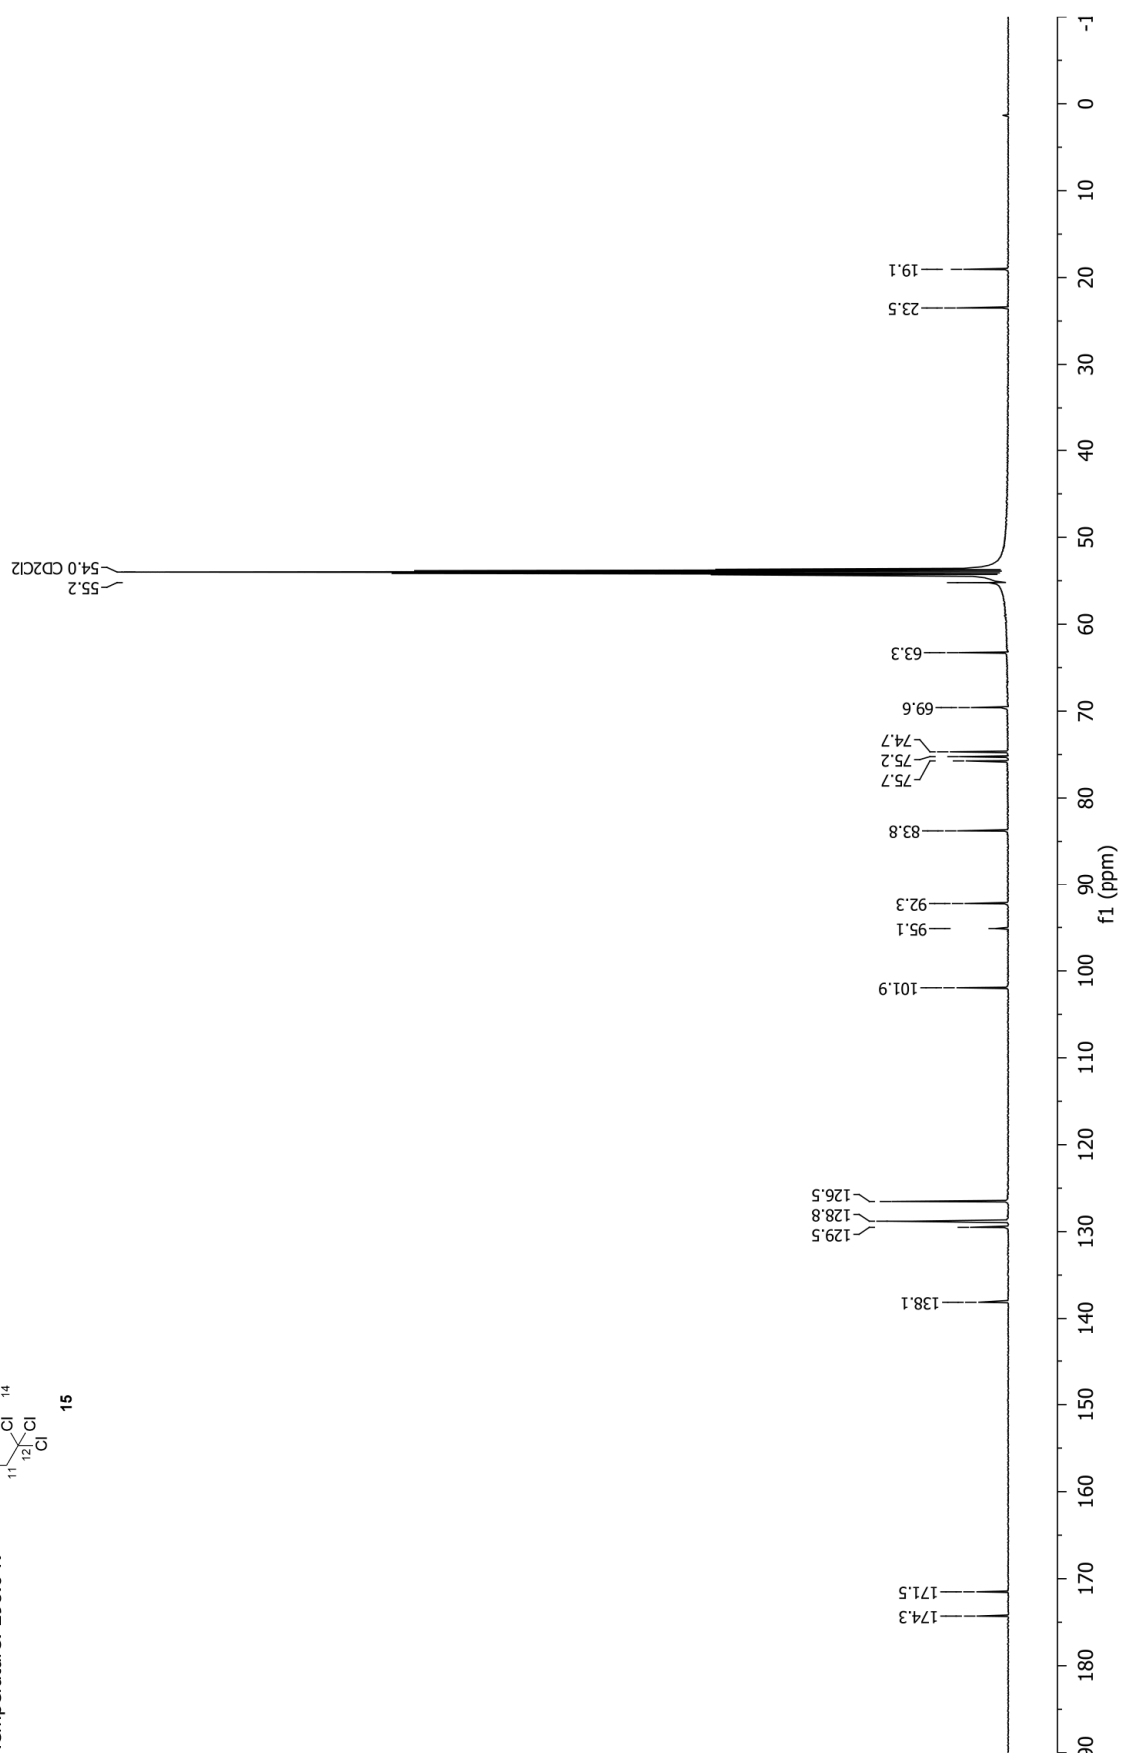

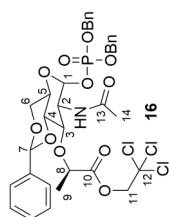

Nucleus:  $^1\text{H}$   
 Frequency: 700.41 MHz  
 Solvent:  $\text{CD}_2\text{Cl}_2$   
 Temperature: 298.0 K

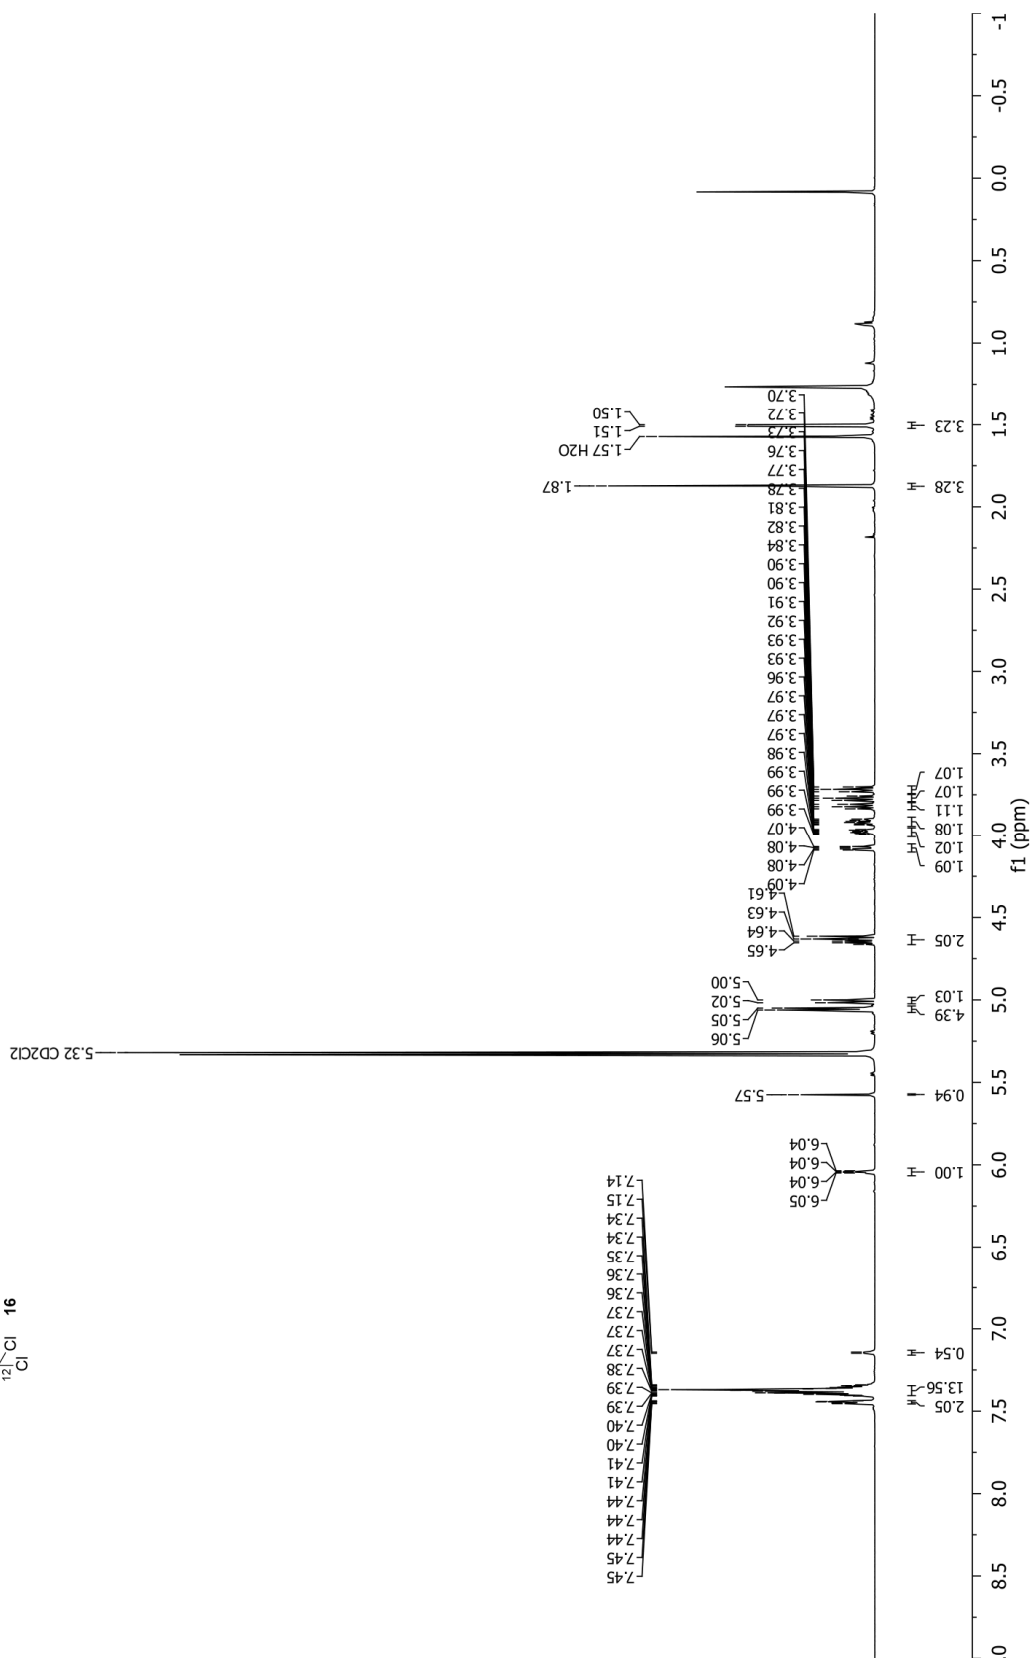

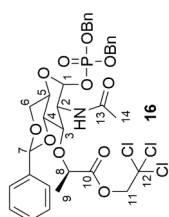

Nucleus:  $^{13}\text{C}$   
 Frequency: 176.14 MHz  
 Solvent:  $\text{CD}_2\text{Cl}_2$   
 Temperature: 298.0 K

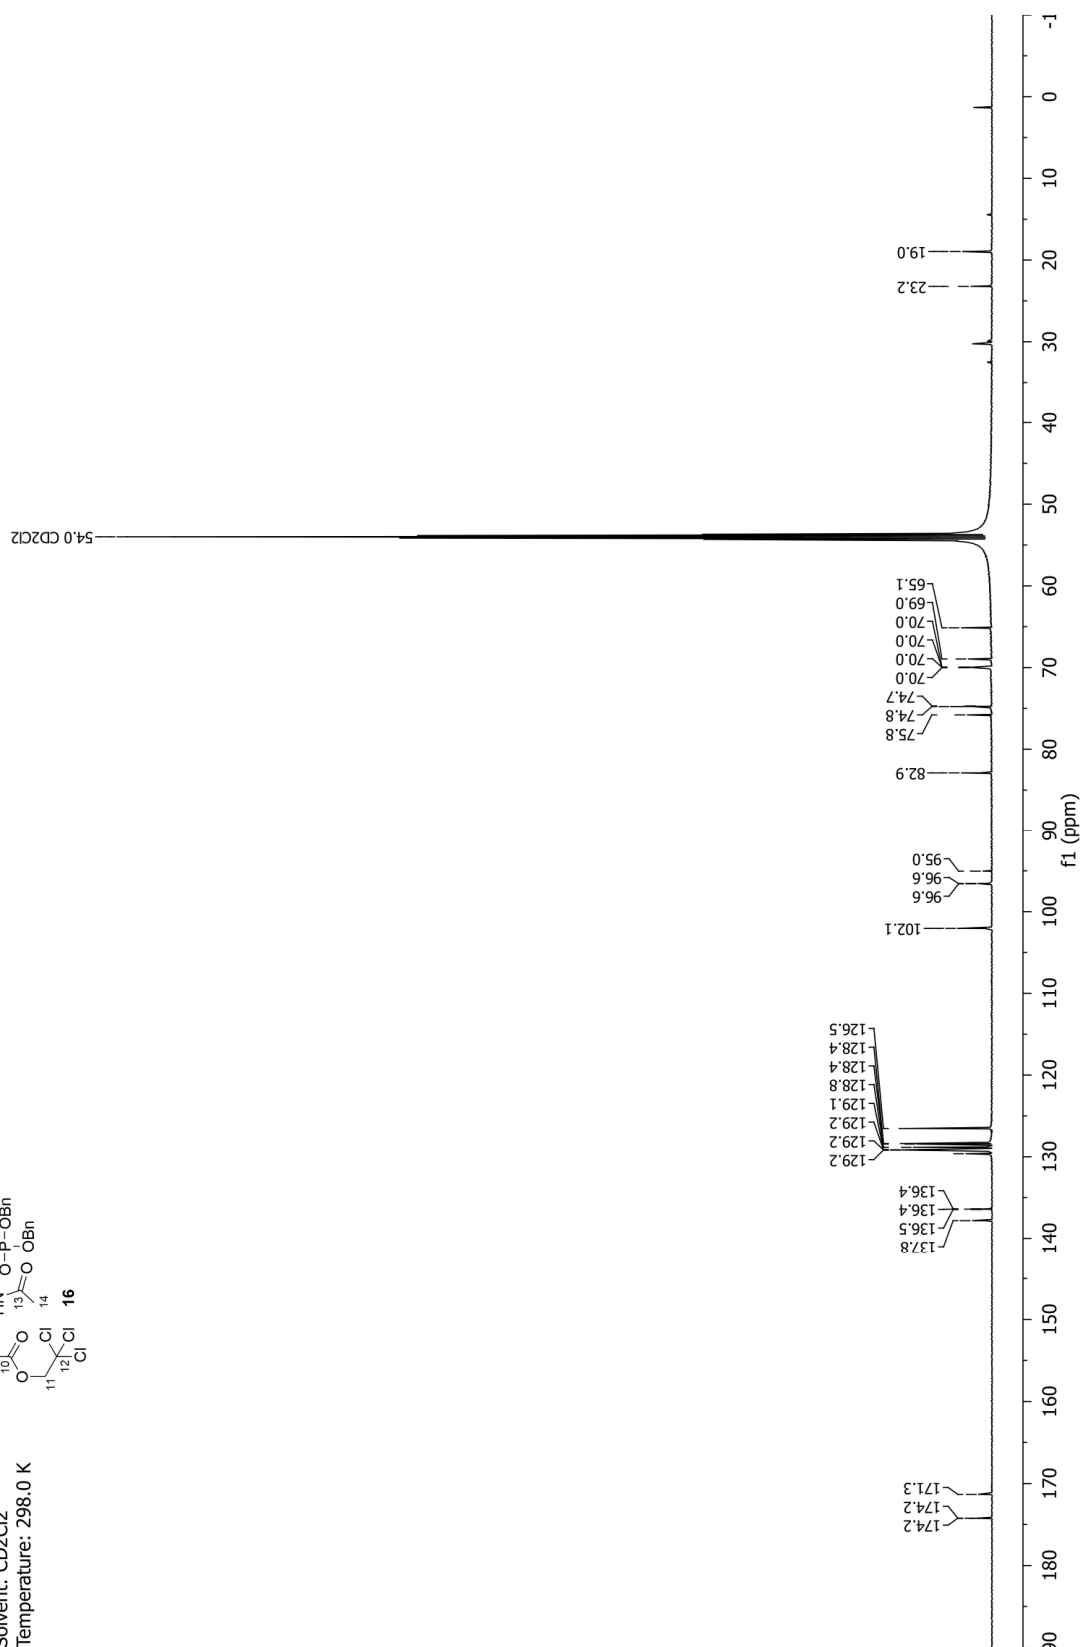

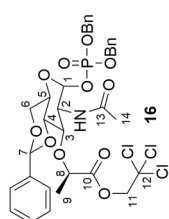

Nucleus:  $^{31}\text{P}$   
 Frequency: 283.52 MHz  
 Solvent:  $\text{CDCl}_2$   
 Temperature: 298.0 K

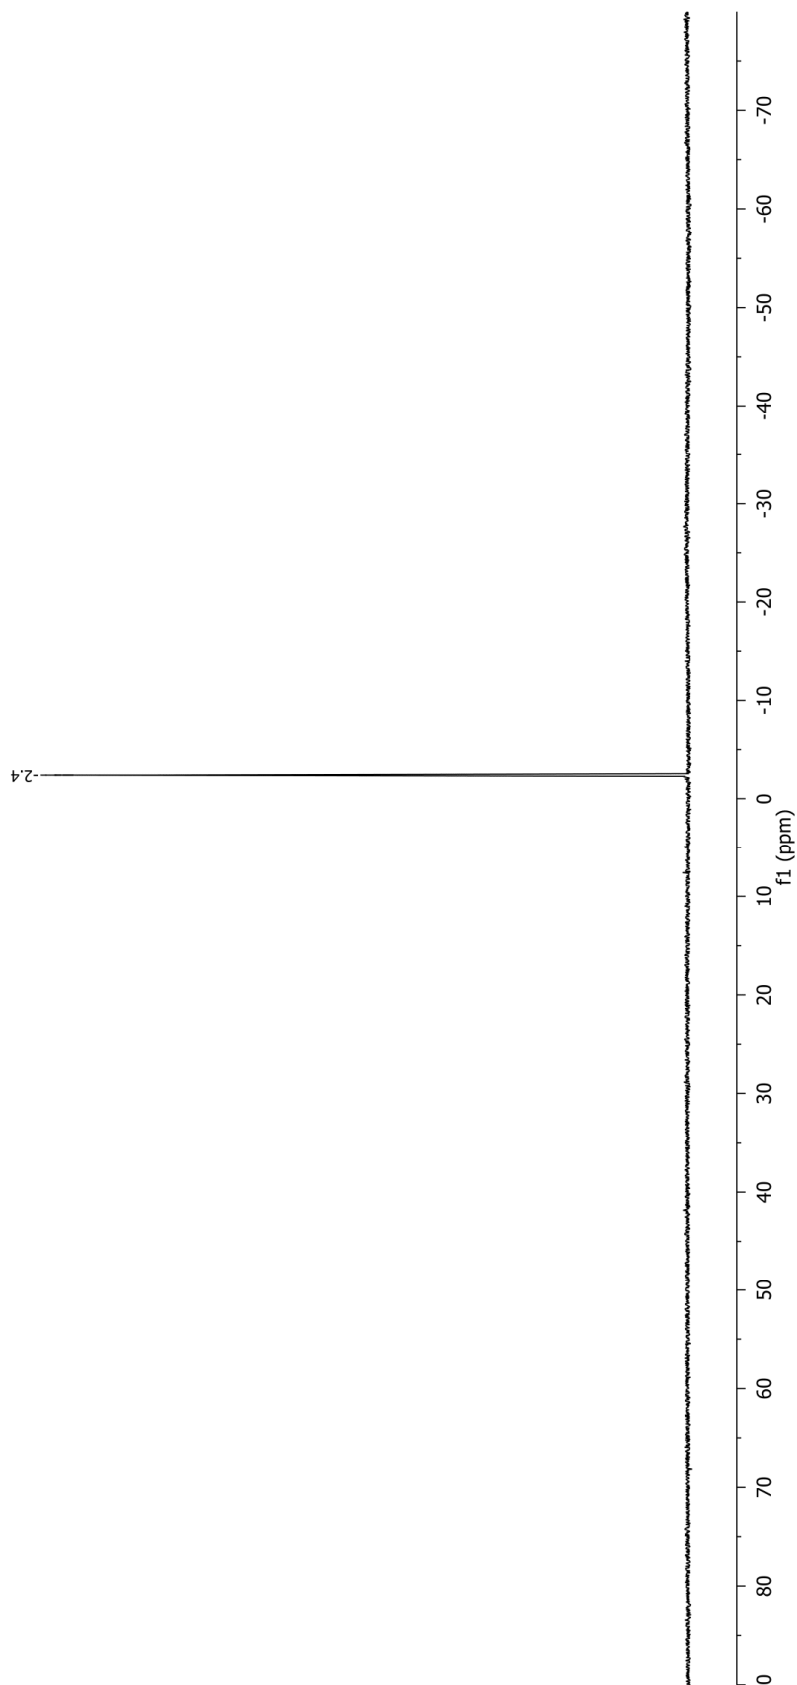

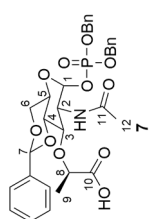

Nucleus:  $^1\text{H}$   
 Frequency: 700.41 MHz  
 Solvent: MeOD  
 Temperature: 298.0 K

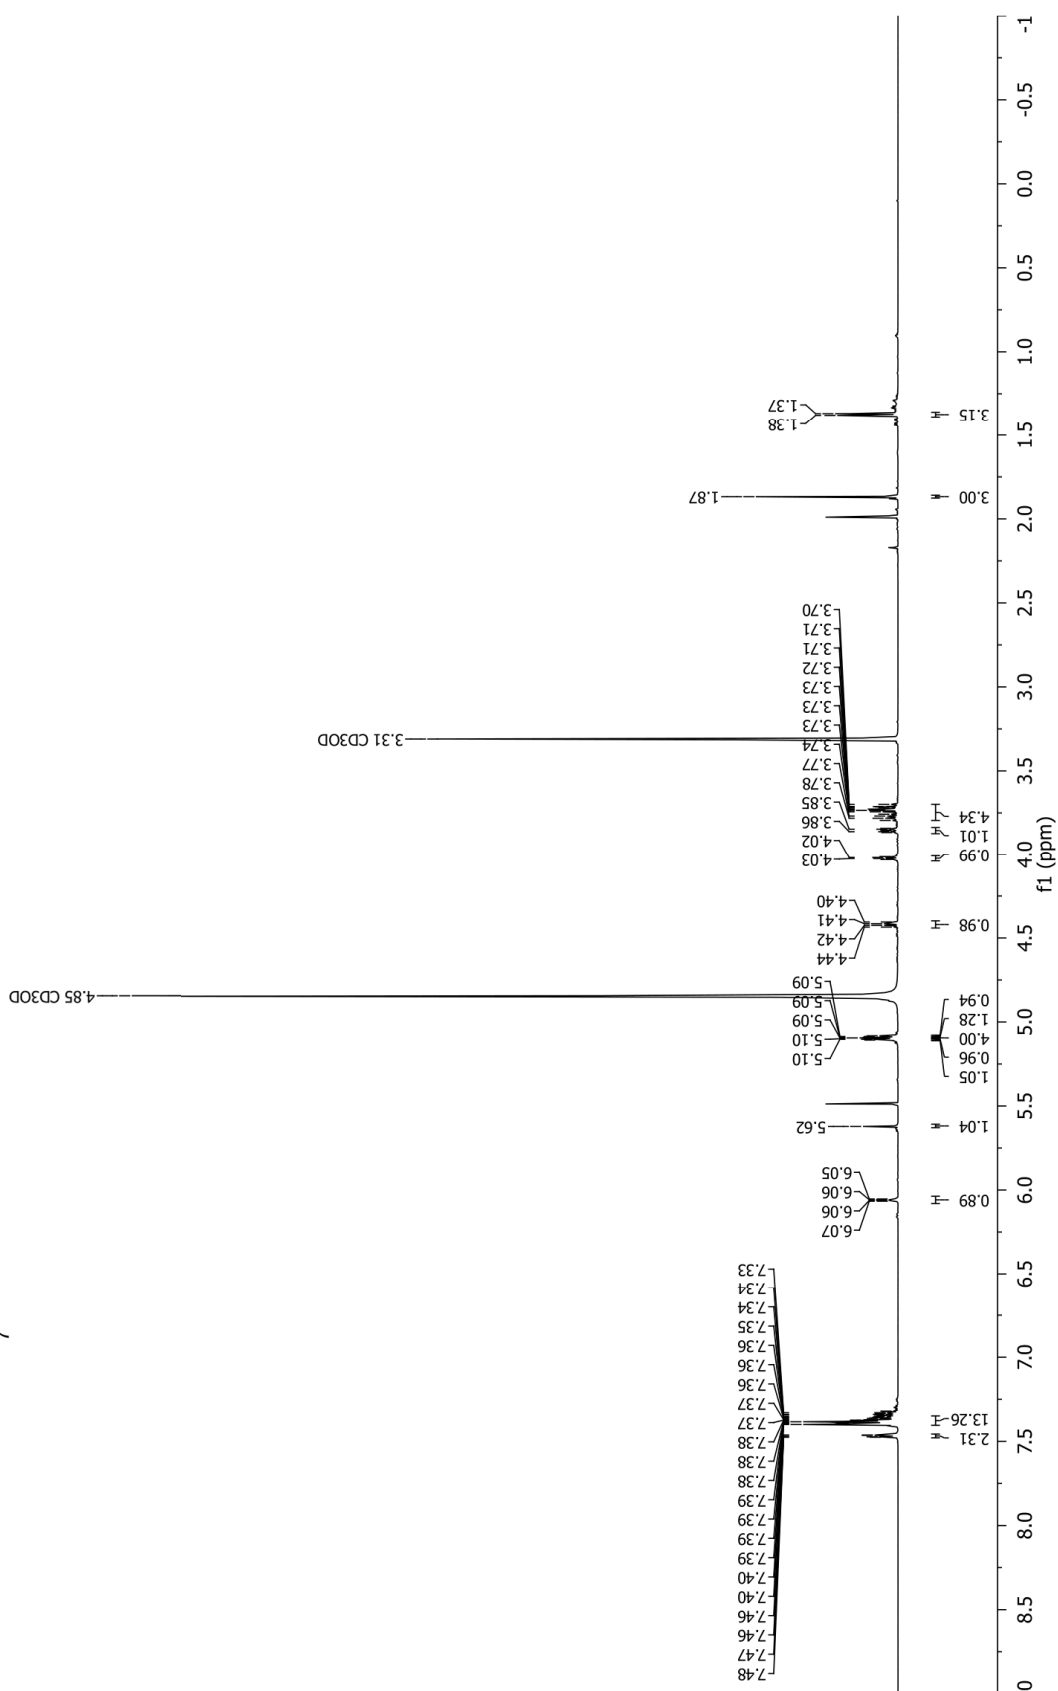



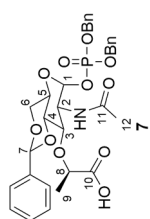

Nucleus:  $^{13}\text{C}$   
 Frequency: 176.14 MHz  
 Solvent: MeOD  
 Temperature: 298.0 K

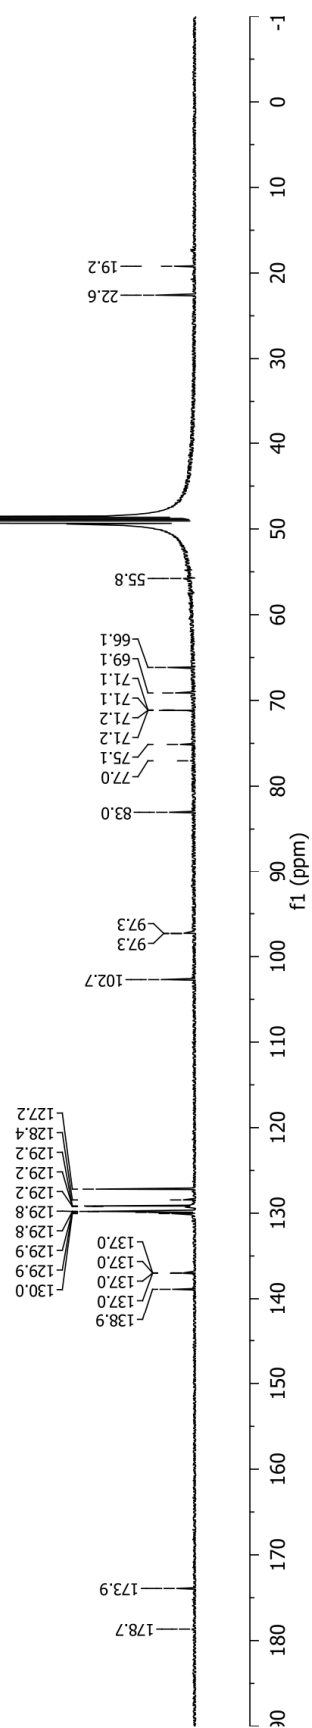

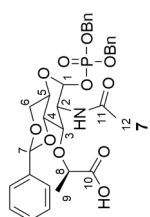

Nucleus:  $^{31}\text{P}$   
 Frequency: 283.52 MHz  
 Solvent: MeOD  
 Temperature: 298.0 K

-3.0

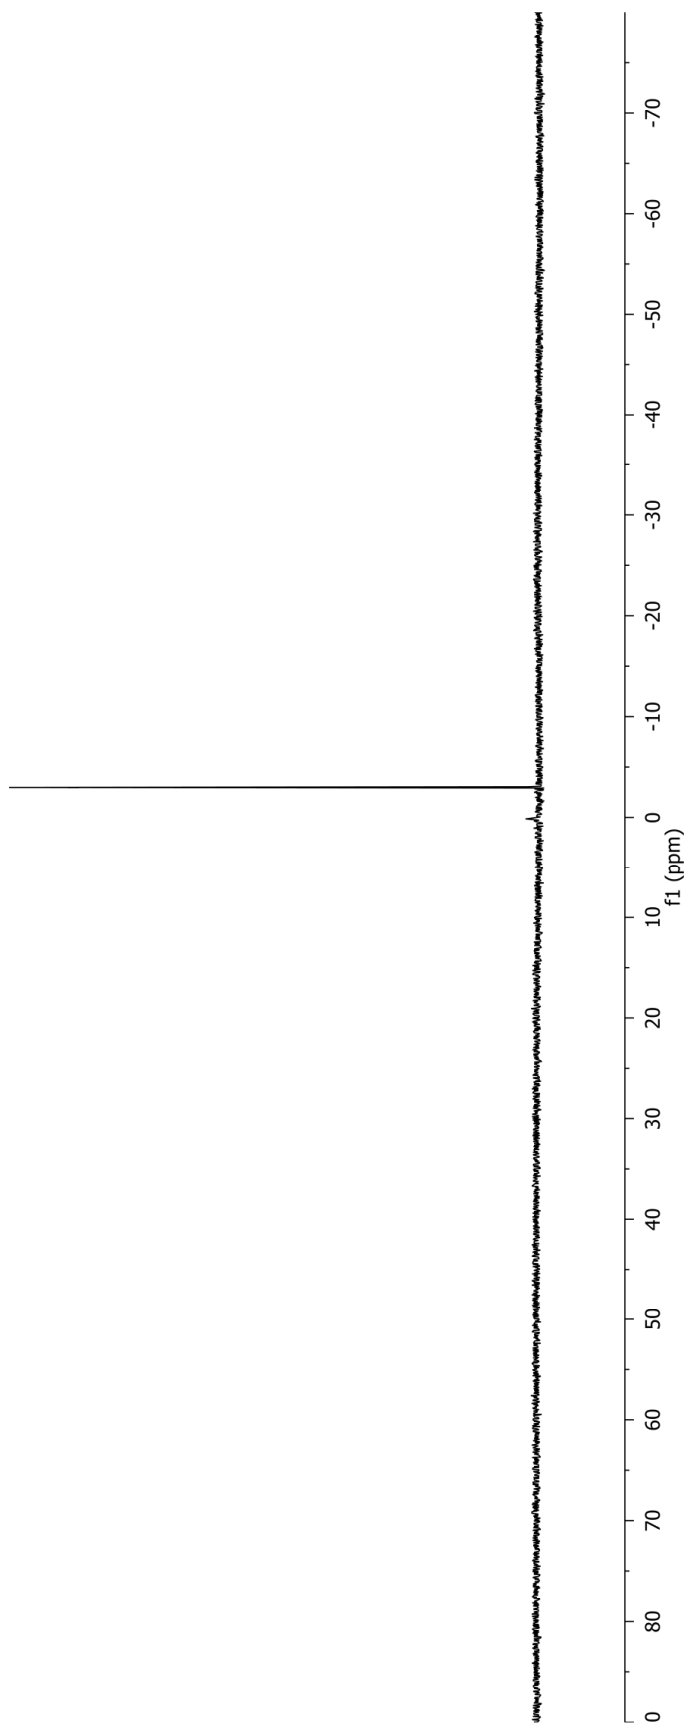

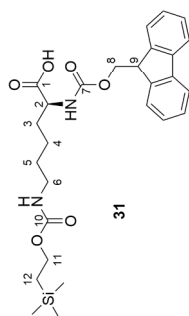

Nucleus:  $^1\text{H}$   
 Frequency: 500.13 MHz  
 Solvent: MeOD  
 Temperature: 298.0 K

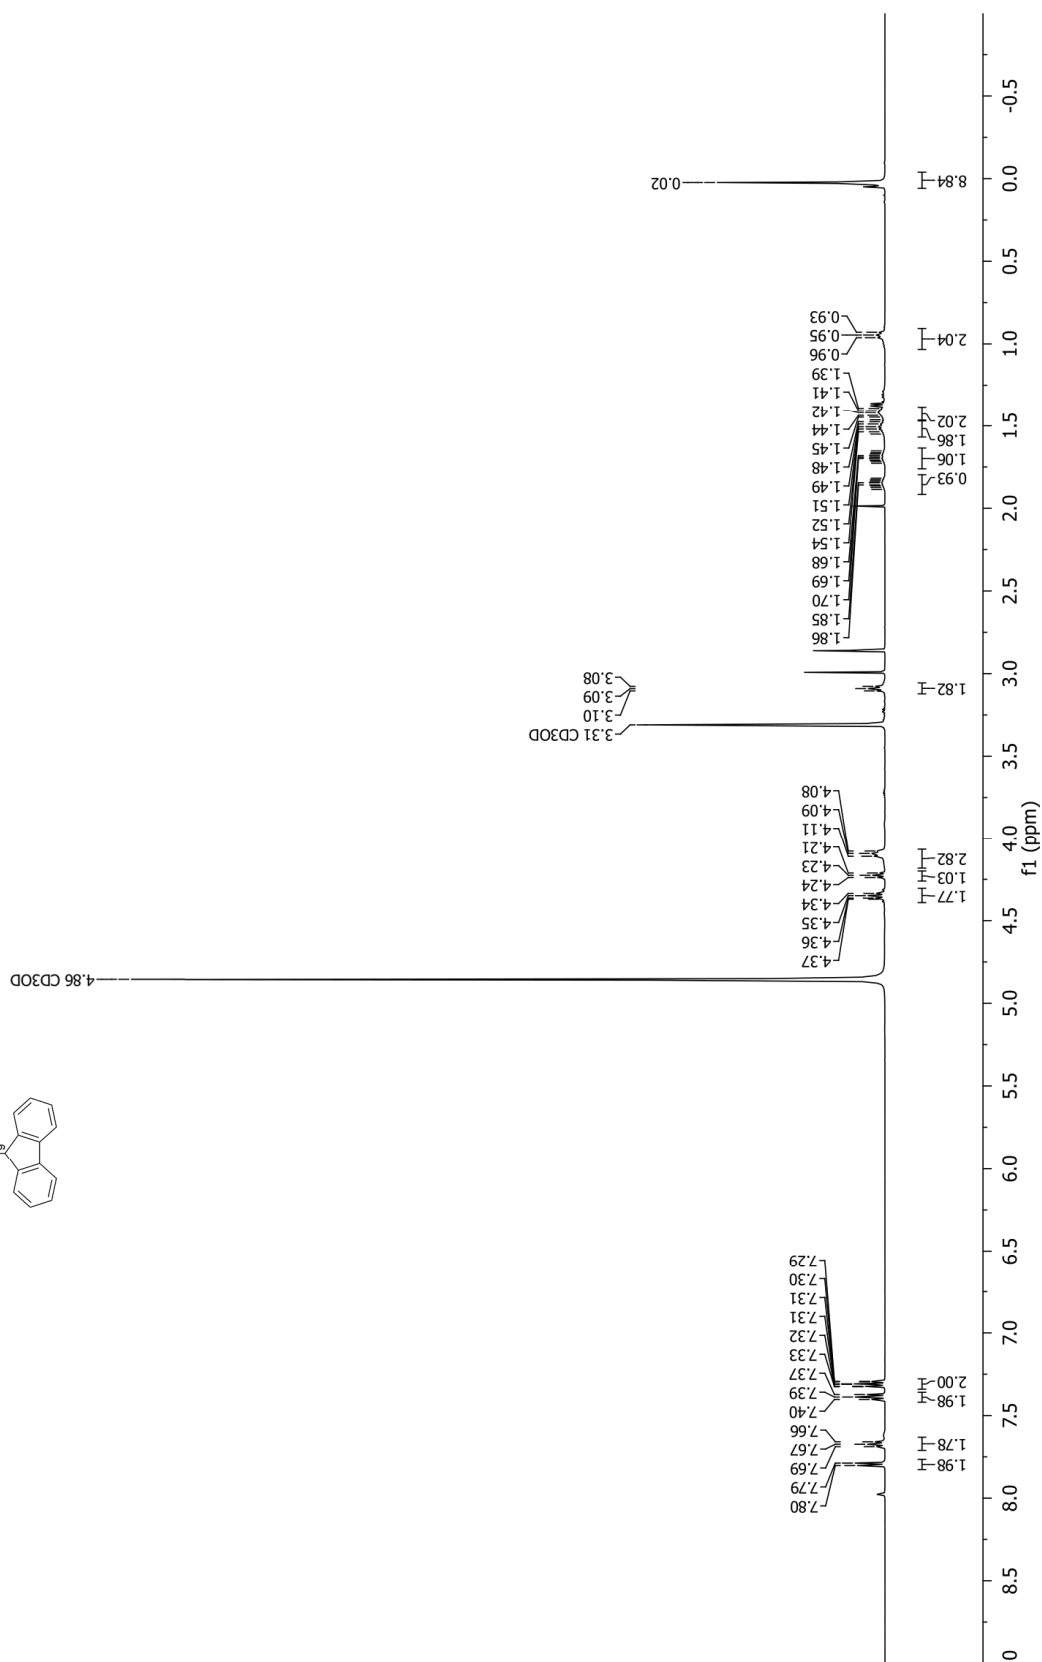

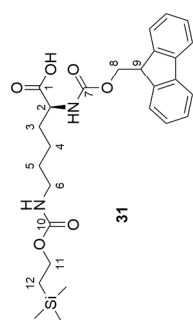

Nucleus:  $^{13}\text{C}$   
 Frequency: 125.77 MHz  
 Solvent: MeOD  
 Temperature: 298.0 K

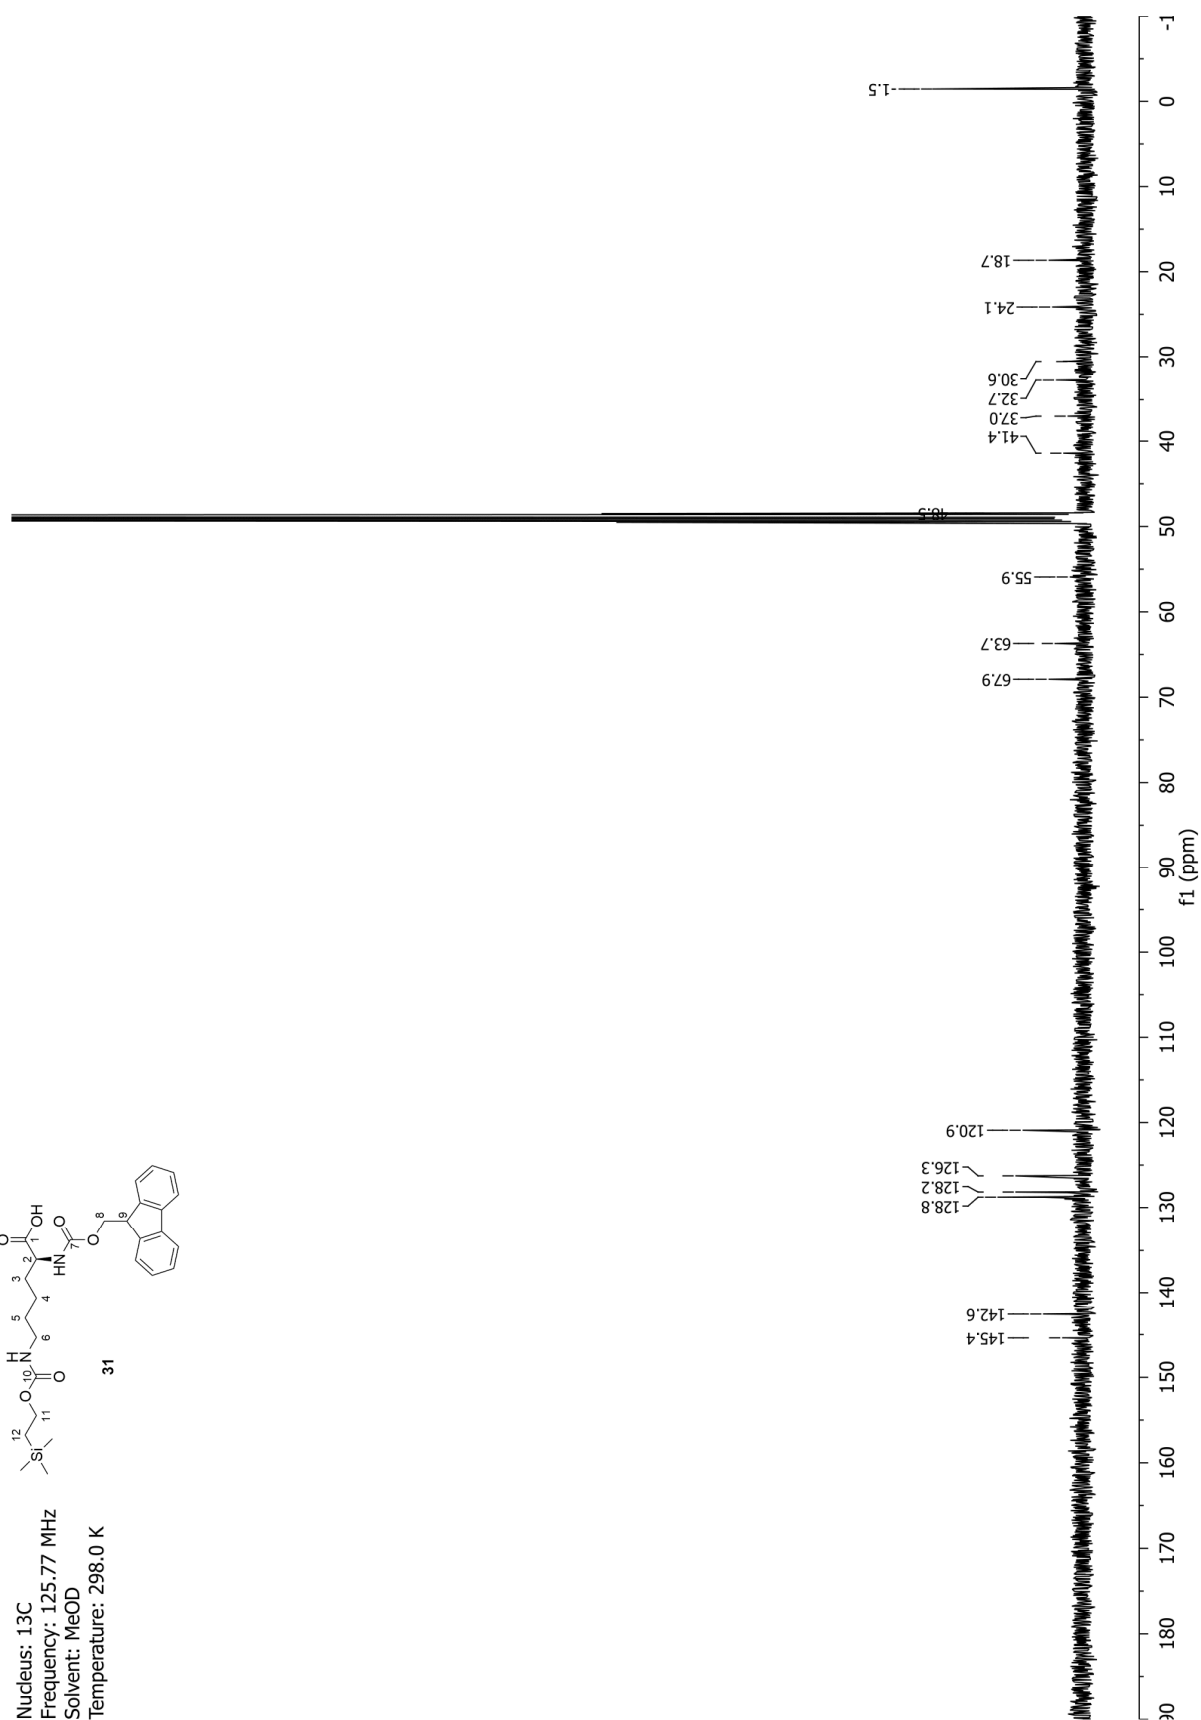

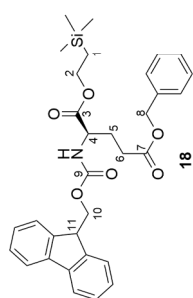

Nucleus:  $^1\text{H}$   
 Frequency: 500.13 MHz  
 Solvent: MeOD  
 Temperature: 298.0 K

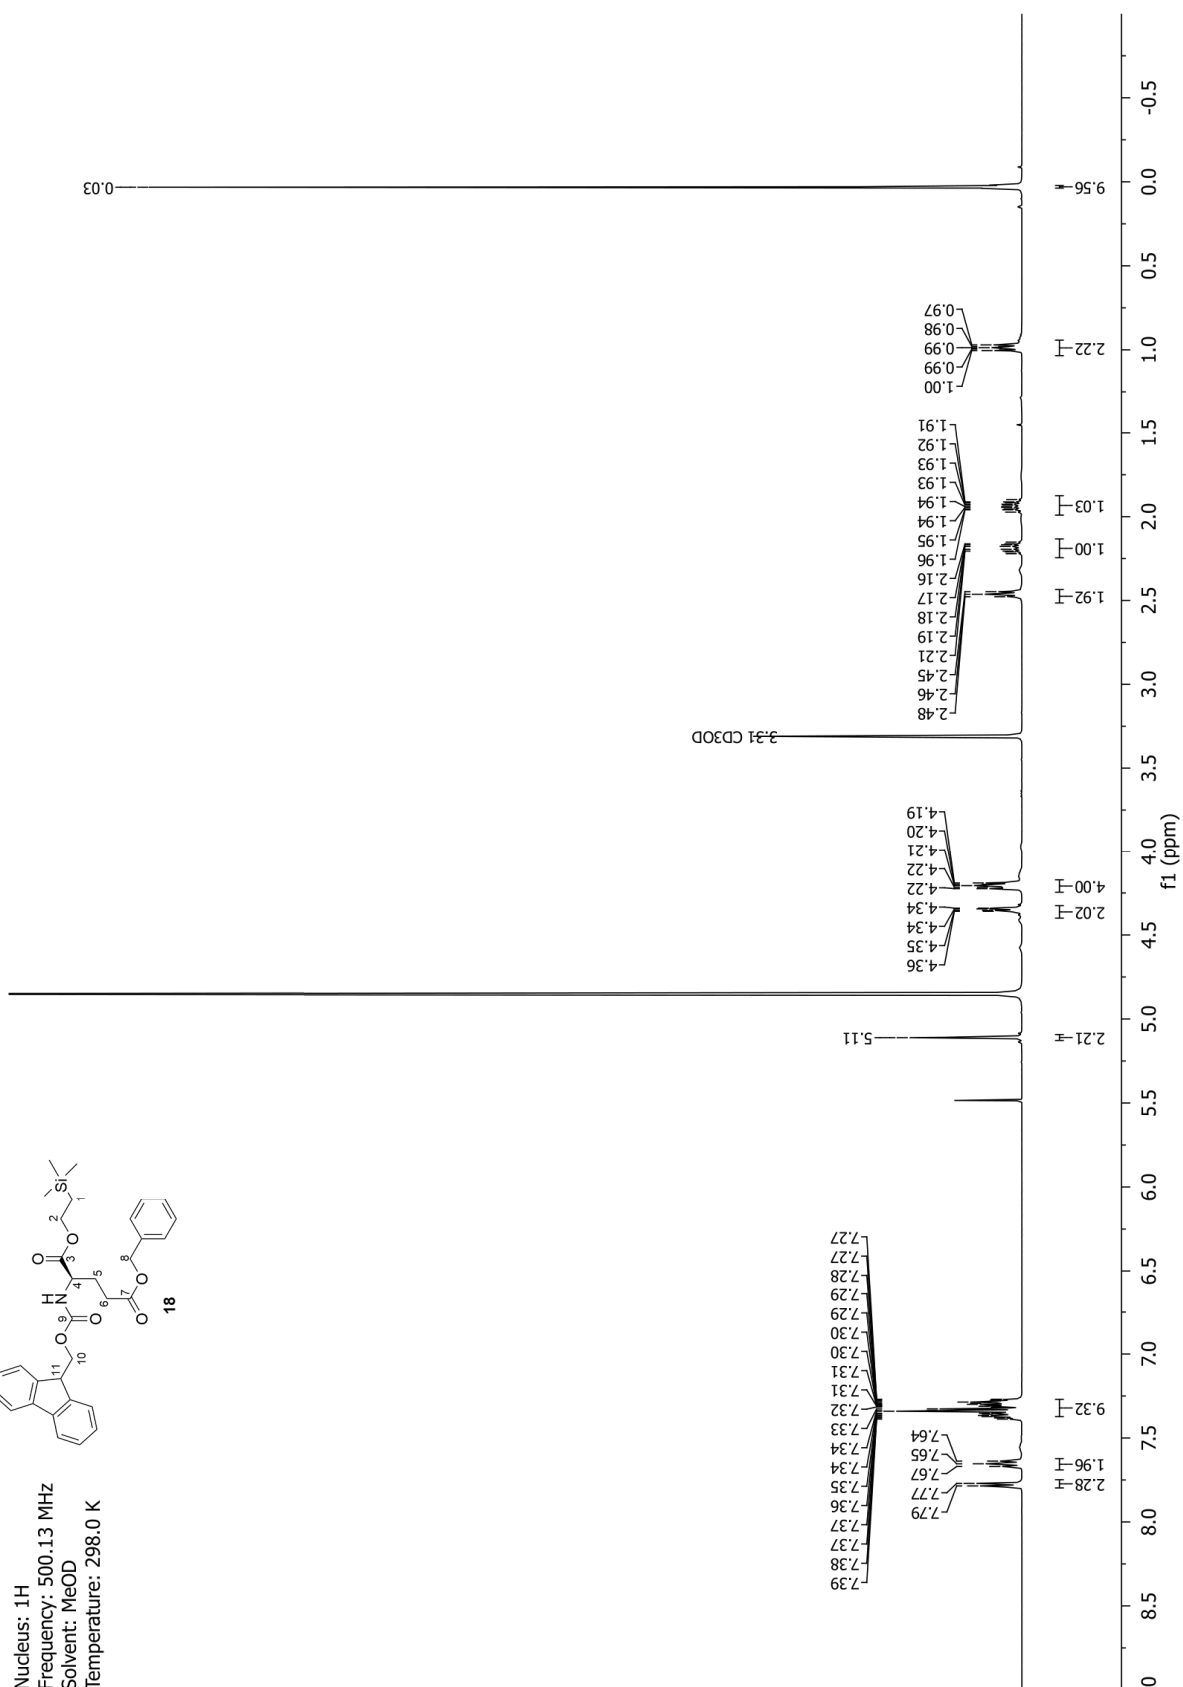

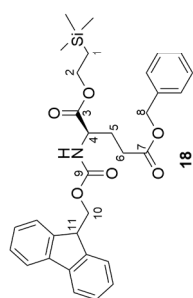

Nucleus:  $^{13}\text{C}$   
 Frequency: 125.77 MHz  
 Solvent: MeOD  
 Temperature: 298.0 K

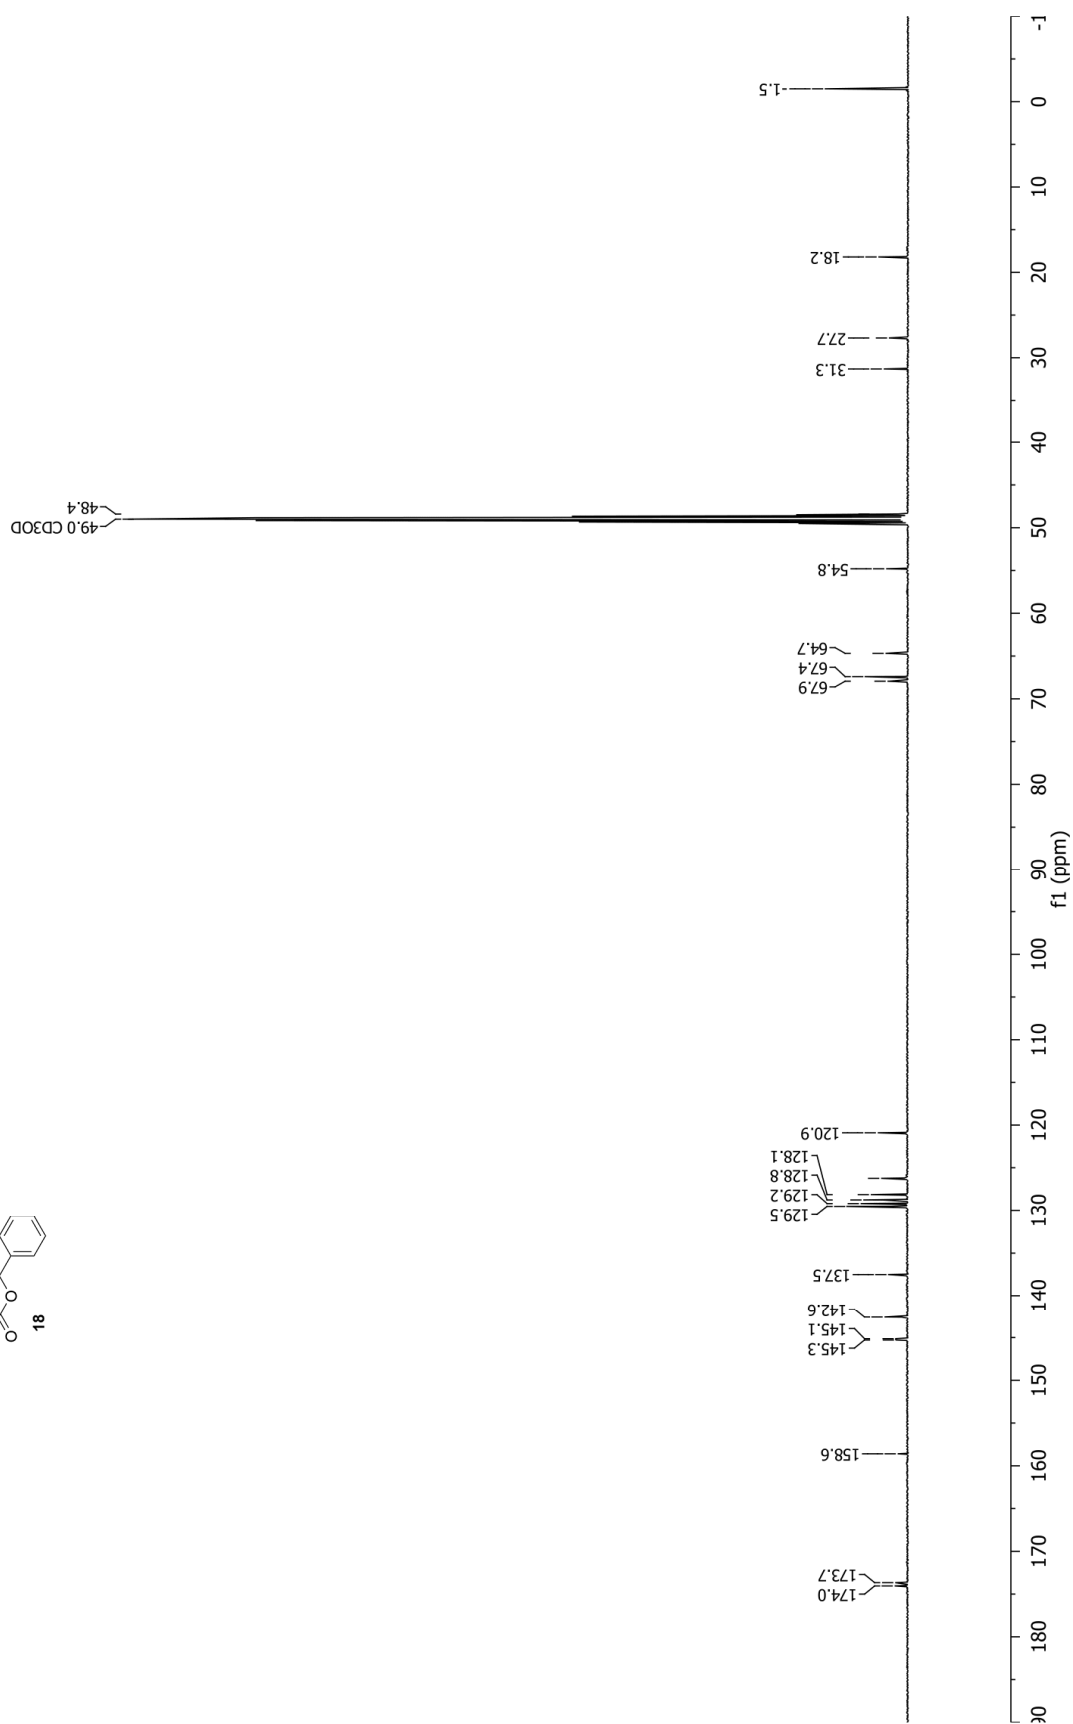

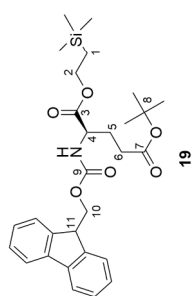

Nucleus:  $^1\text{H}$   
 Frequency: 700.41 MHz  
 Solvent: MeOD  
 Temperature: 298.0 K

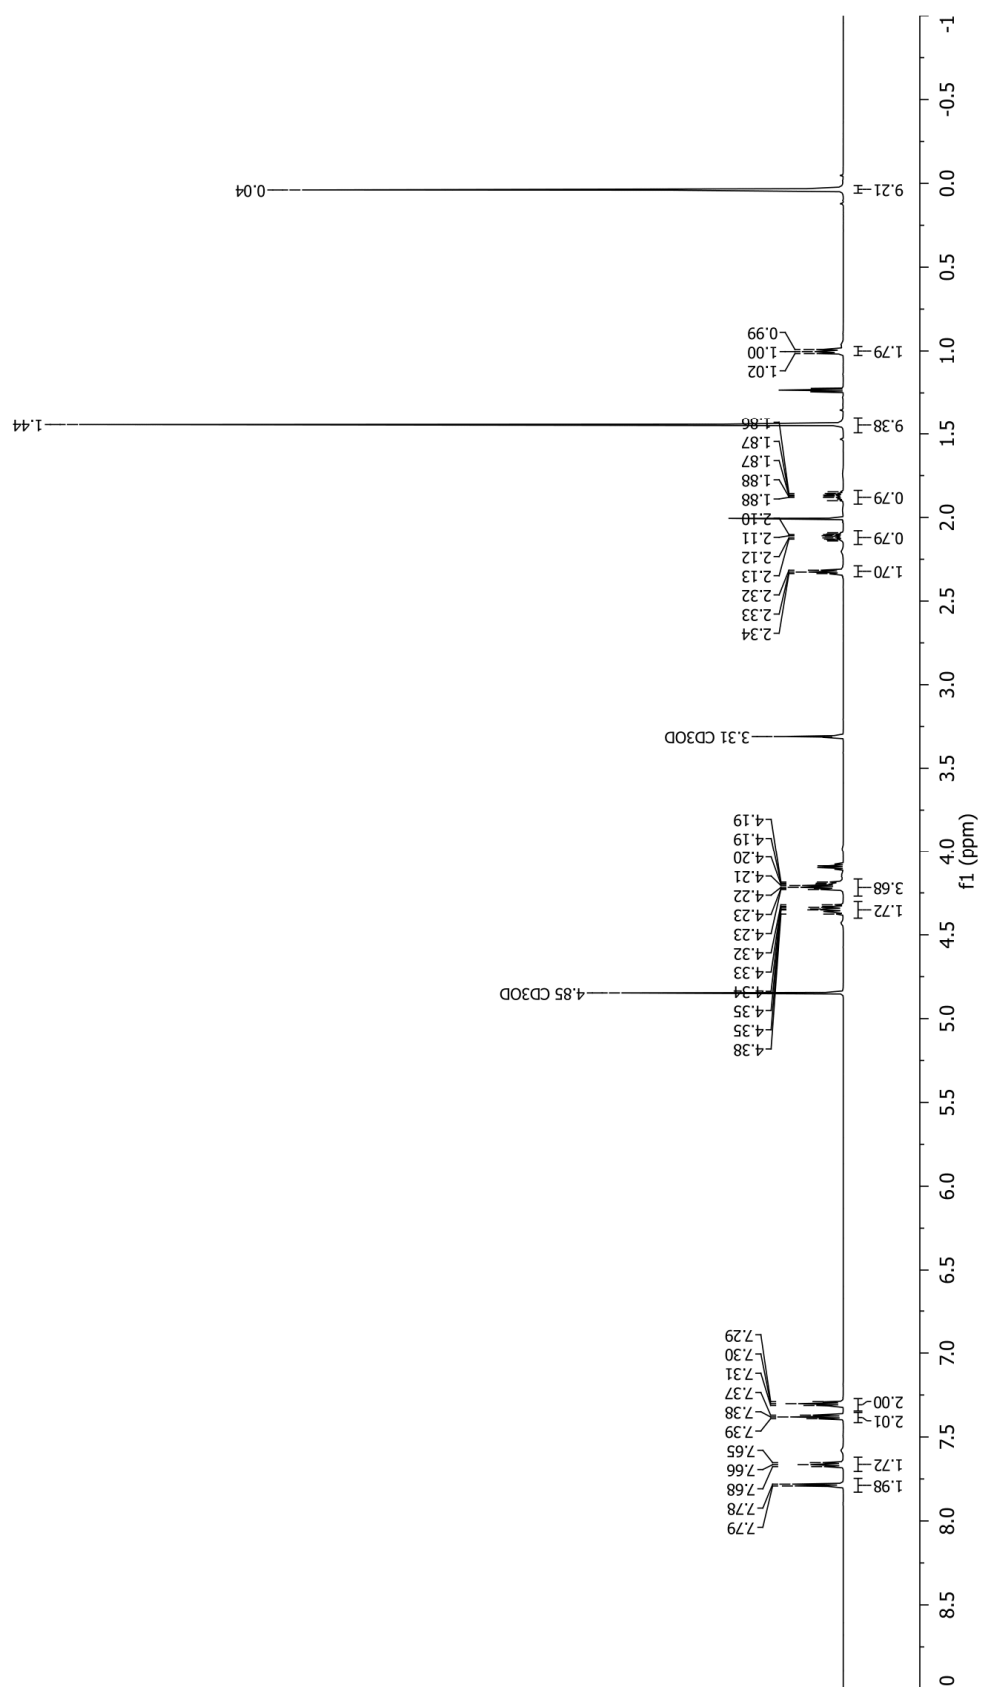

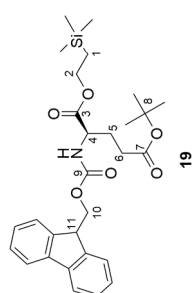

Nucleus:  $^{13}\text{C}$   
 Frequency: 176.12 MHz  
 Solvent: MeOD  
 Temperature: 298.0 K

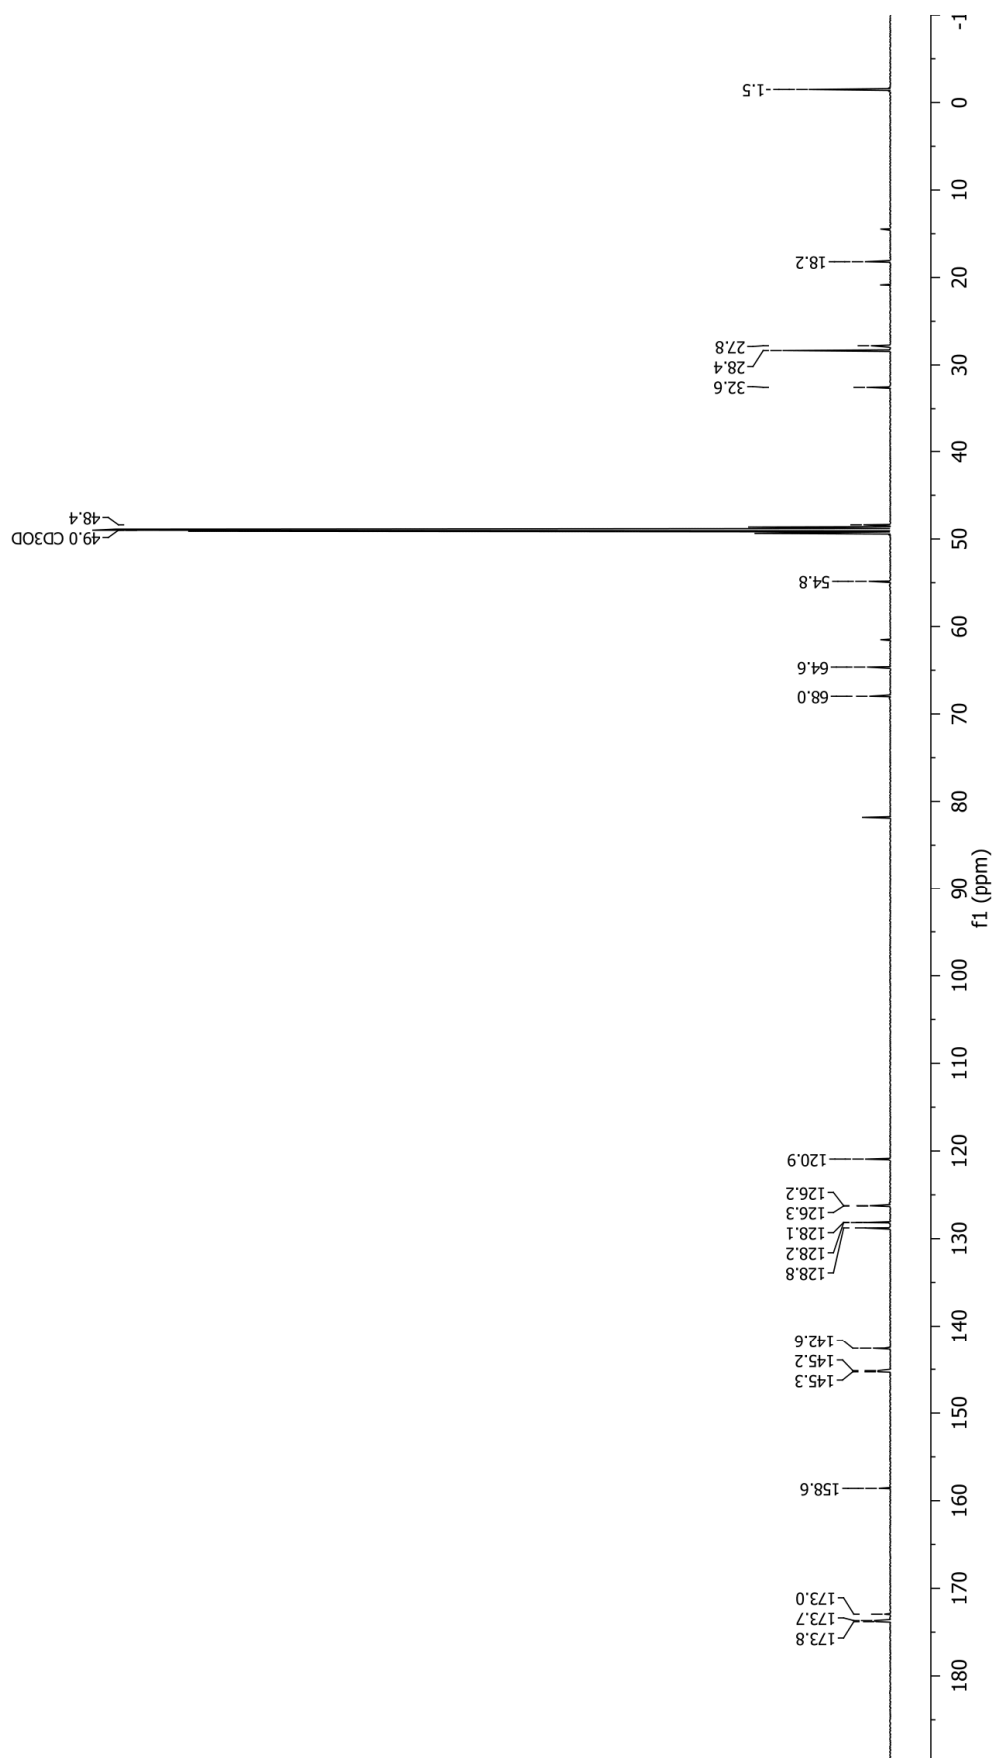



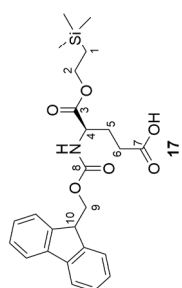

Nucleus:  $^1\text{H}$   
 Frequency: 500.13 MHz  
 Solvent: MeOD  
 Temperature: 298.0 K

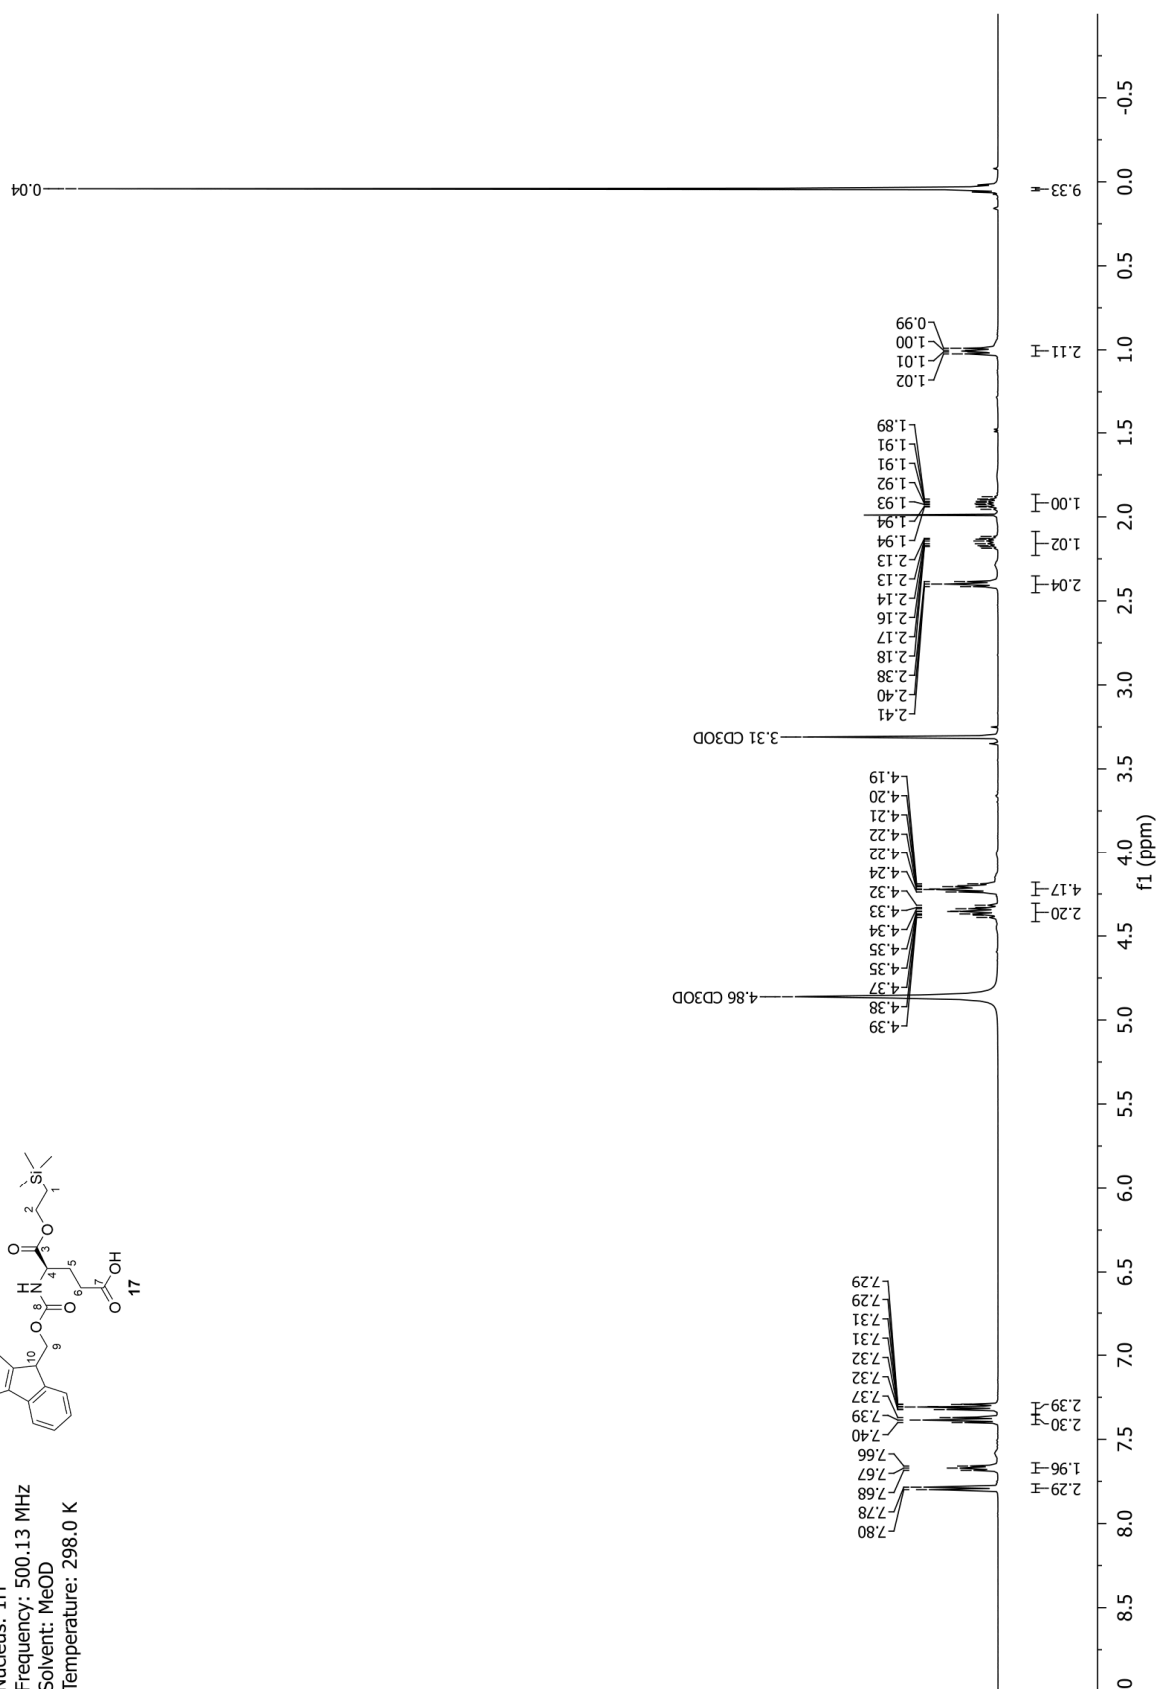

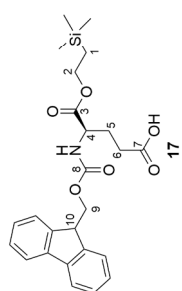

Nucleus:  $^{13}\text{C}$   
 Frequency: 125.77 MHz  
 Solvent: MeOD  
 Temperature: 298.0 K

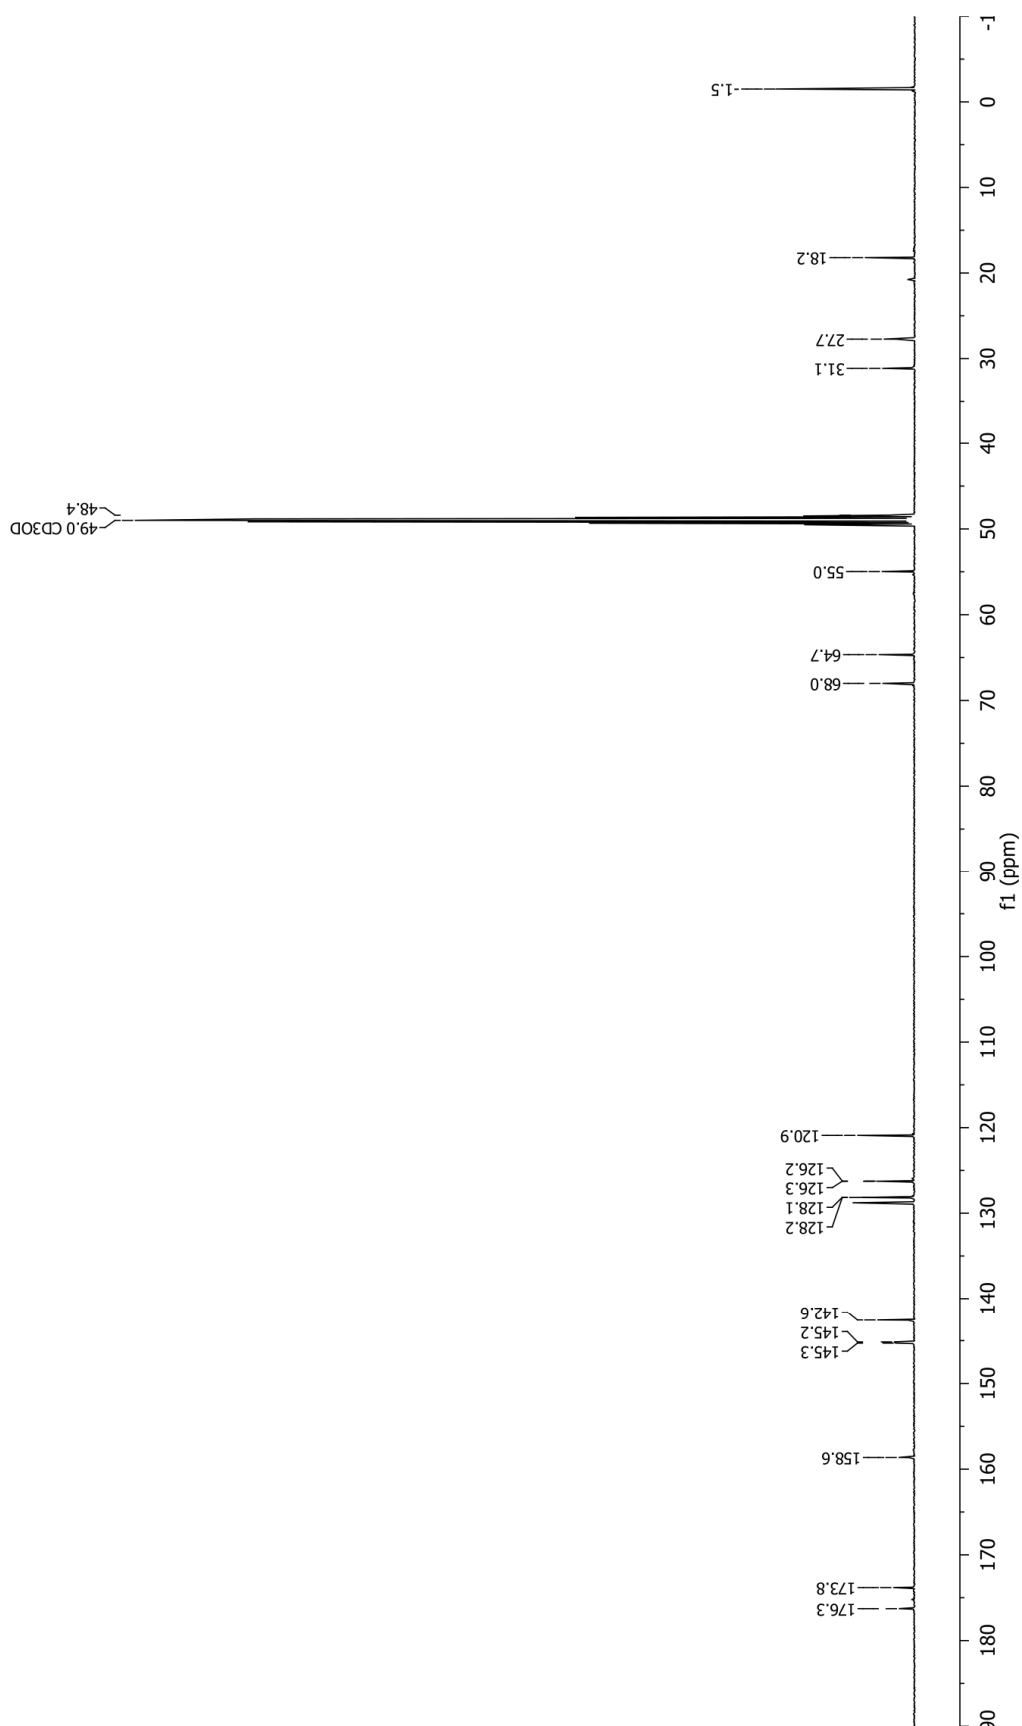

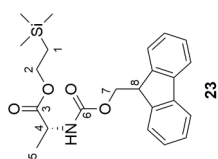

Nucleus:  $^1\text{H}$   
 Frequency: 500.13 MHz  
 Solvent:  $\text{CDCl}_3$   
 Temperature: 298.0 K

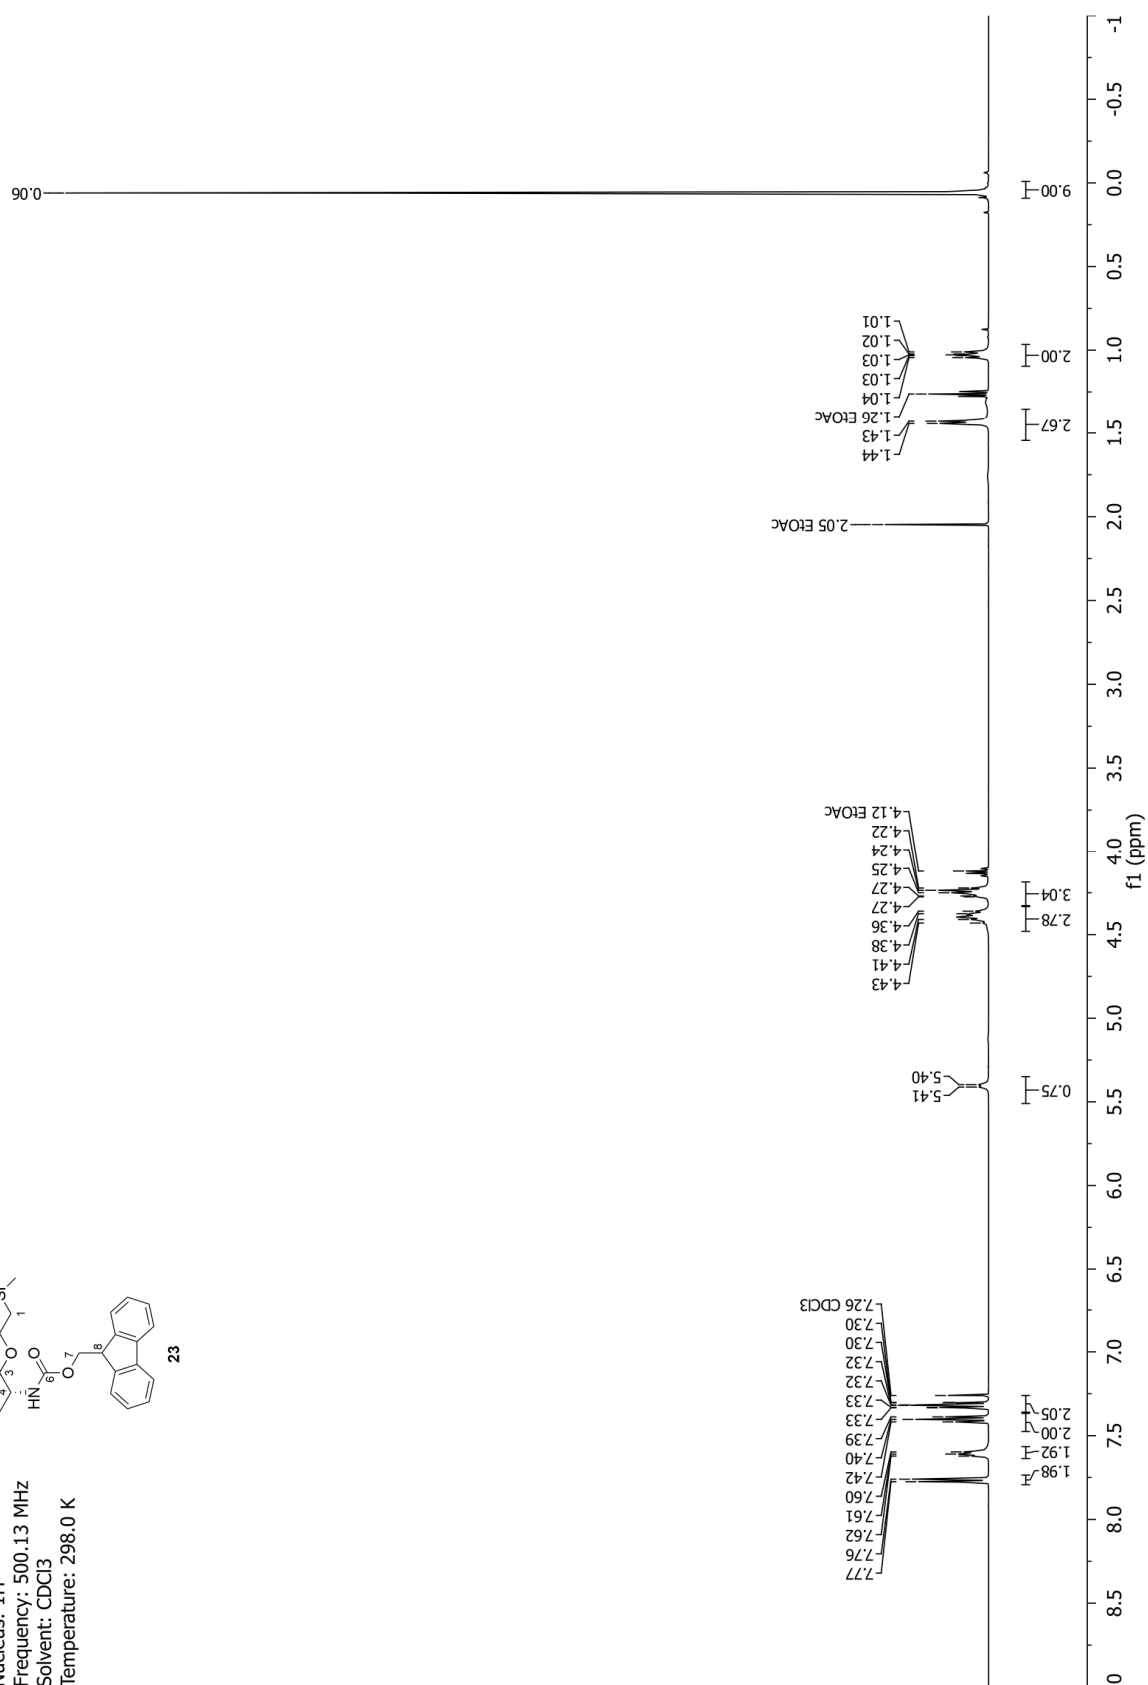

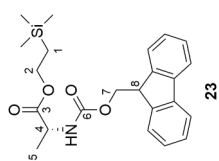

Nucleus:  $^{13}\text{C}$   
 Frequency: 125.77 MHz  
 Solvent:  $\text{CDCl}_3$   
 Temperature: 298.0 K

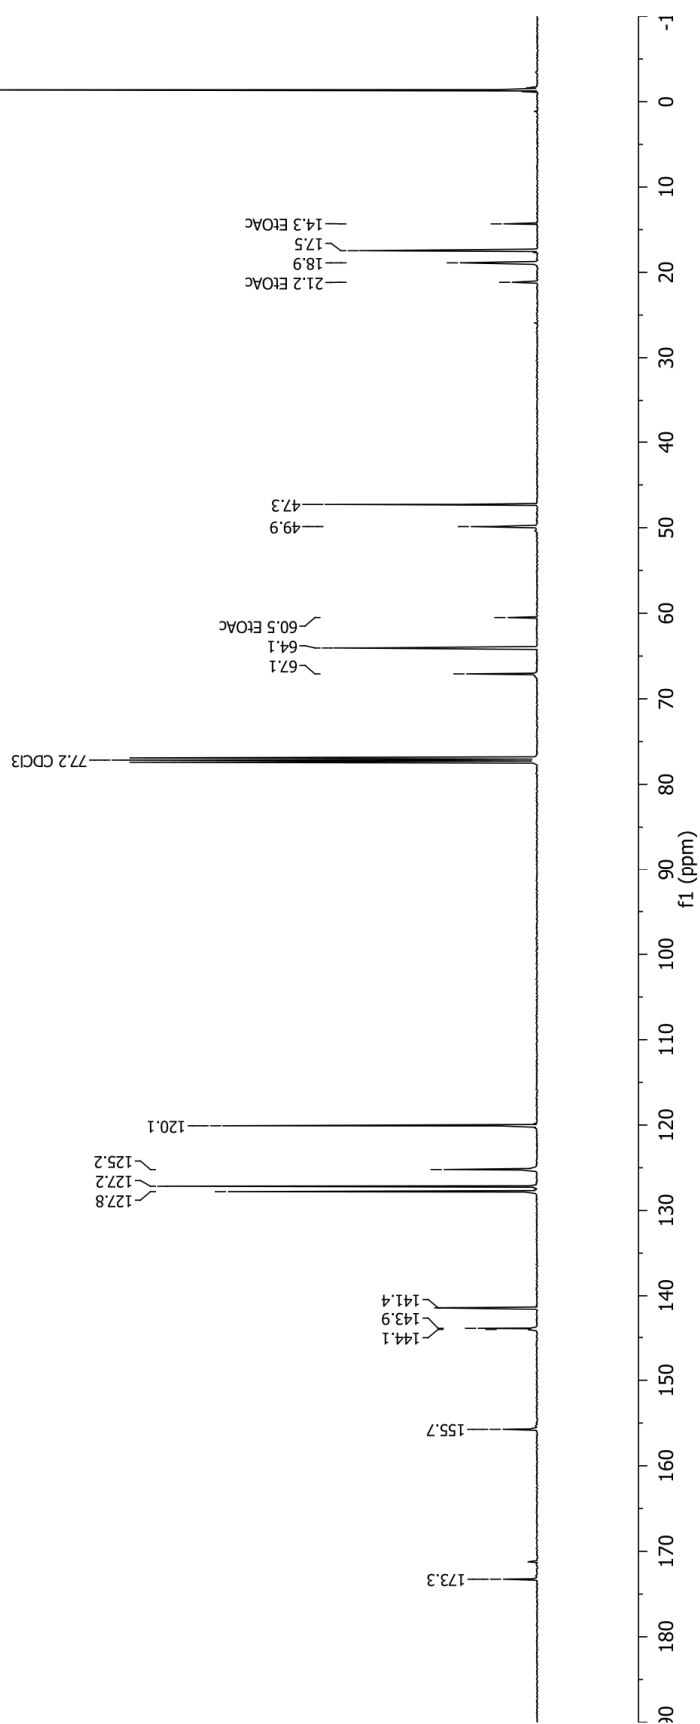

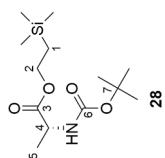

Nucleus:  $^1\text{H}$   
 Frequency: 700.41 MHz  
 Solvent: MeOD  
 Temperature: 298.0 K

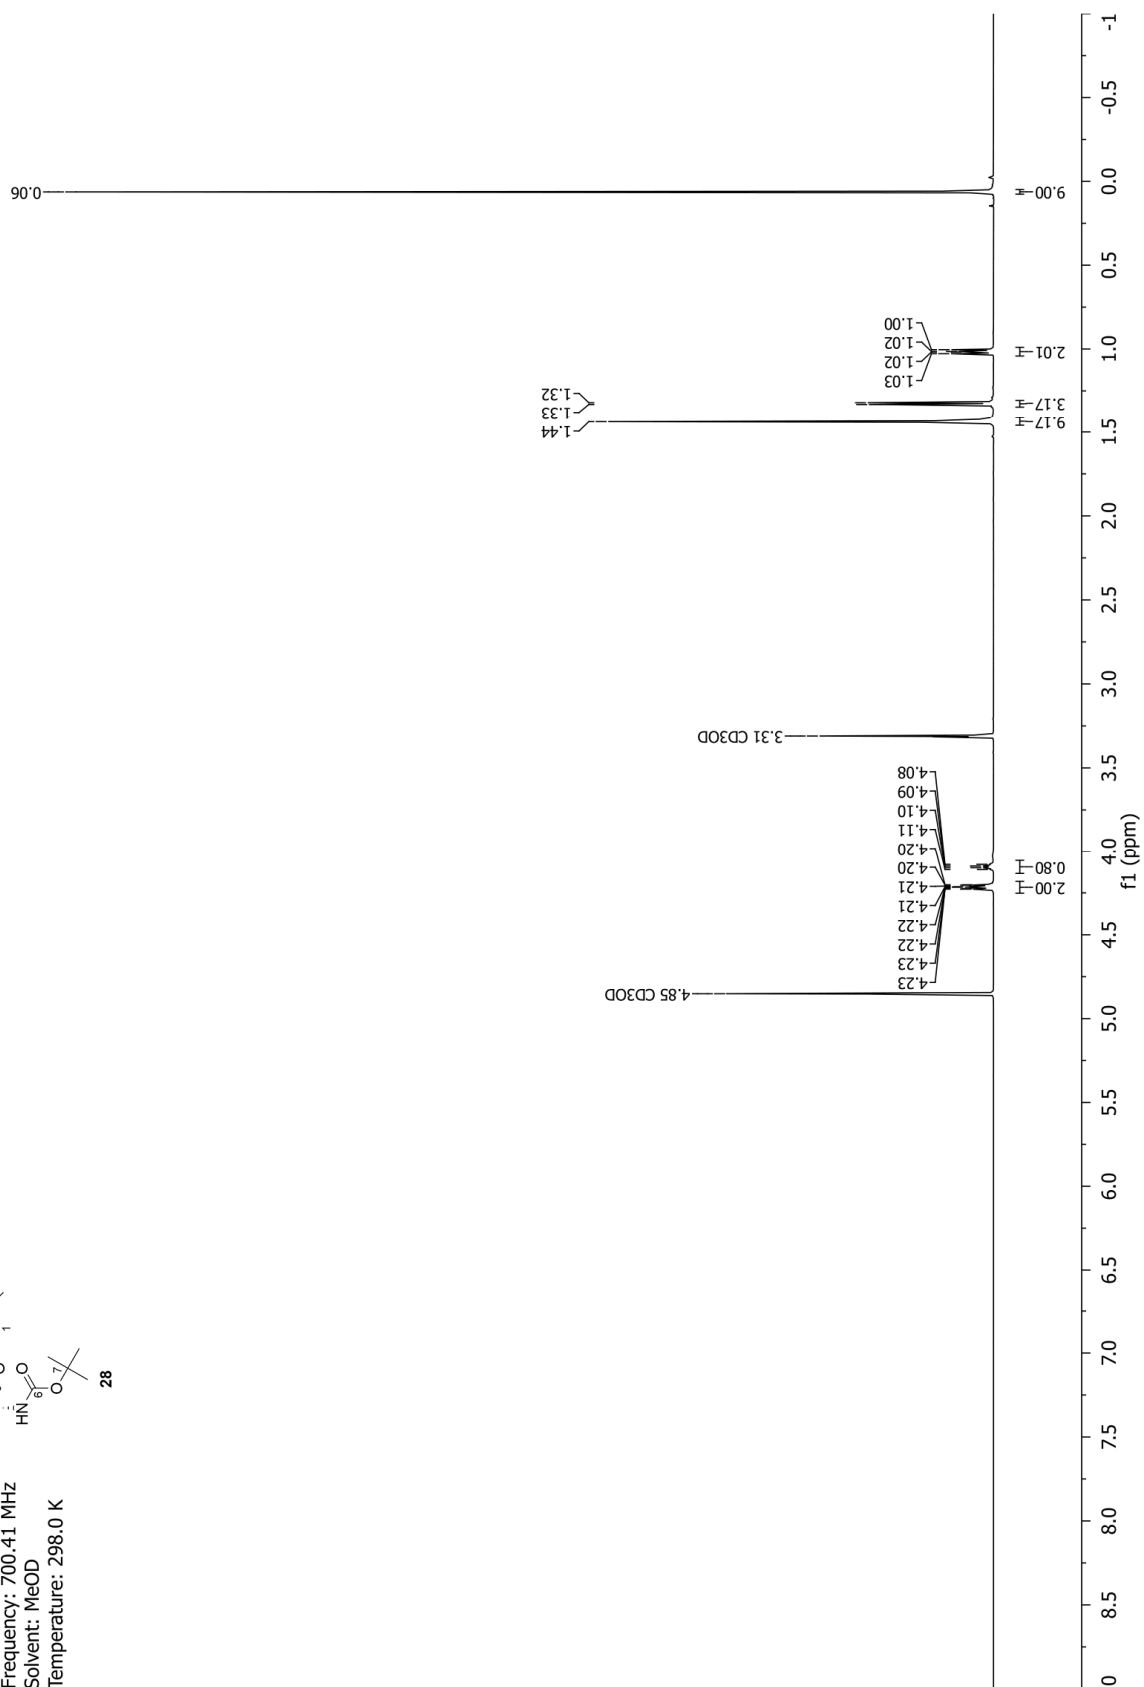

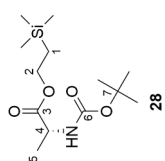

Nucleus:  $^{13}\text{C}$   
 Frequency: 176.14 MHz  
 Solvent: MeOD  
 Temperature: 298.0 K

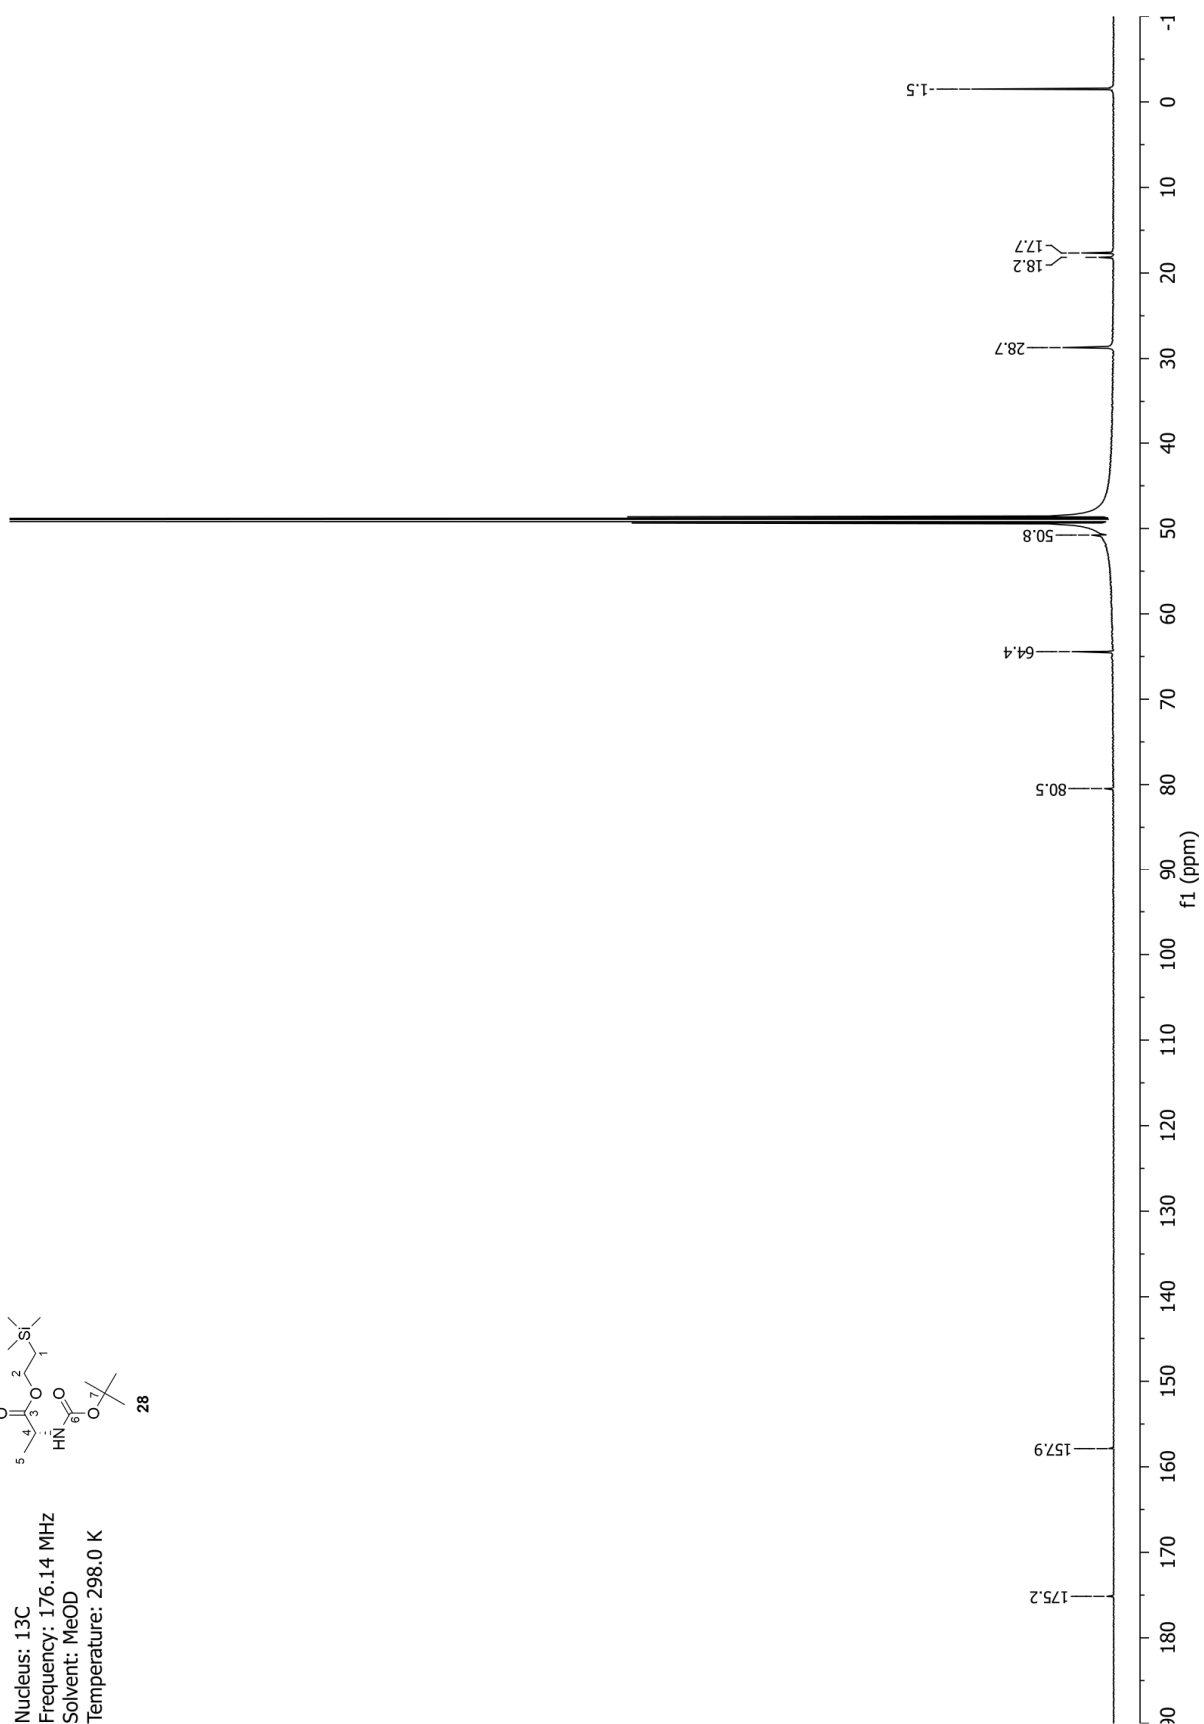

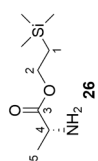

Nucleus:  $^1\text{H}$   
 Frequency: 500.13 MHz  
 Solvent: MeOD  
 Temperature: 298.0 K

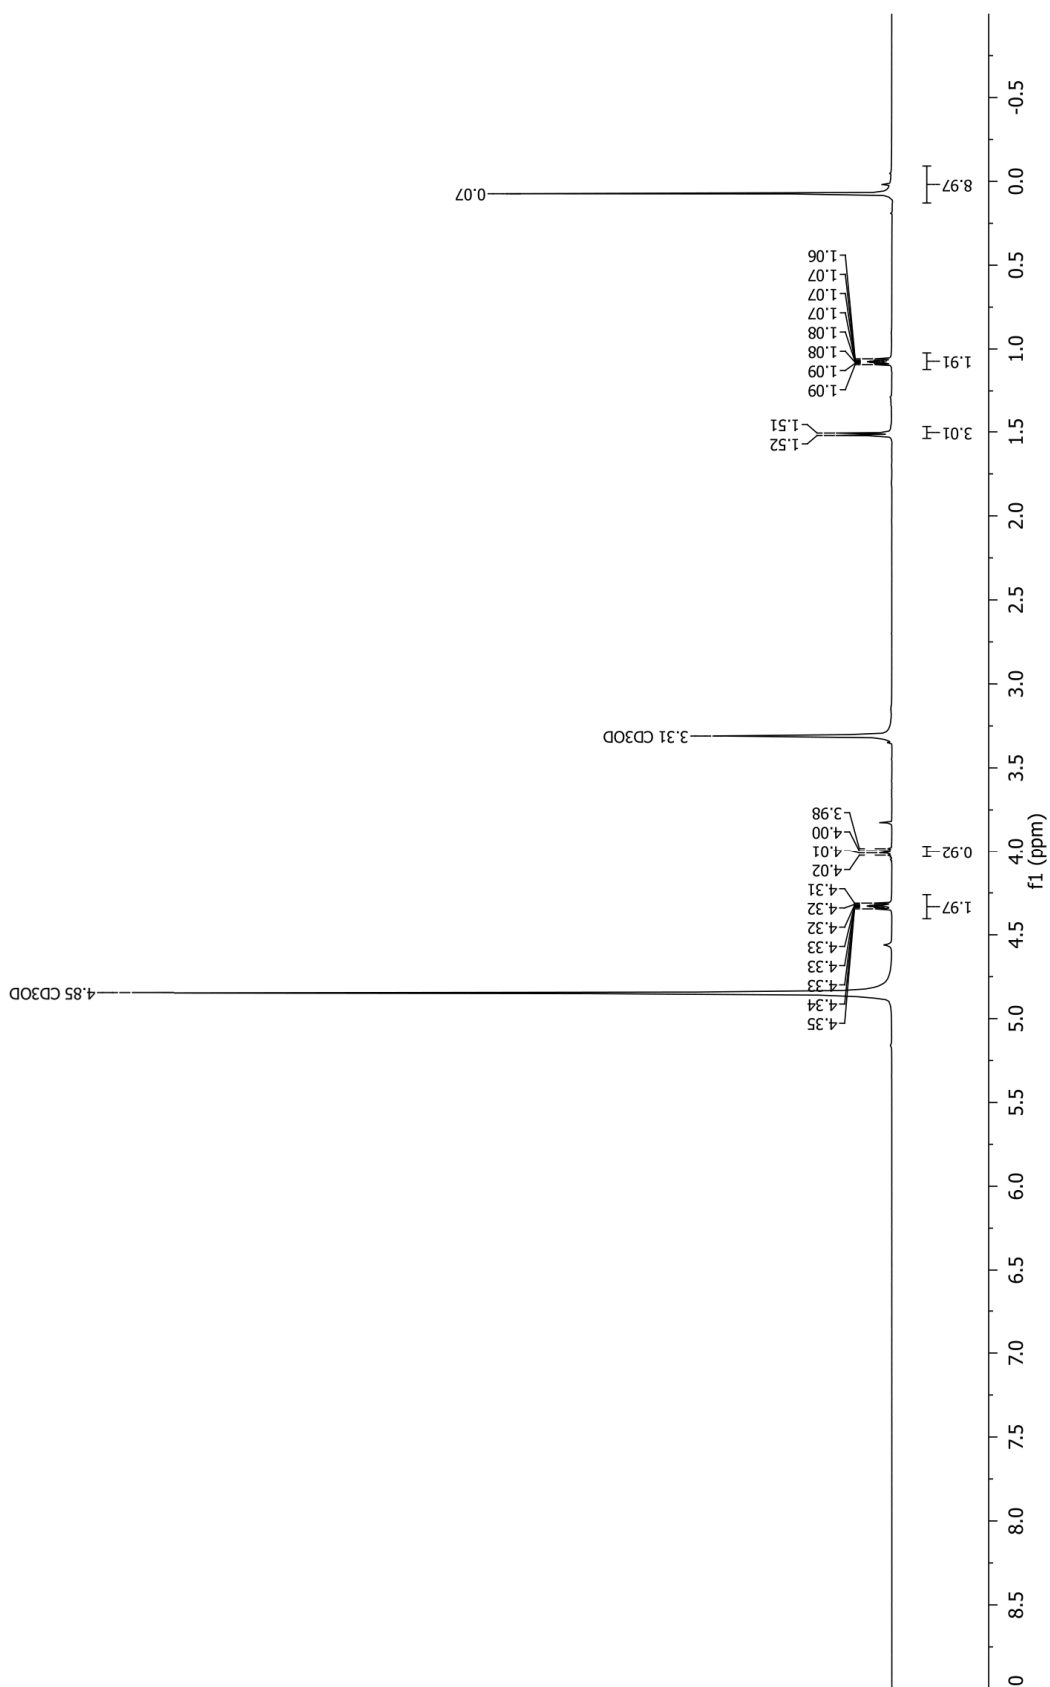

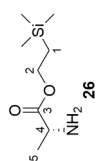

Nucleus:  $^{13}\text{C}$   
 Frequency: 125.77 MHz  
 Solvent: MeOD  
 Temperature: 298.0 K

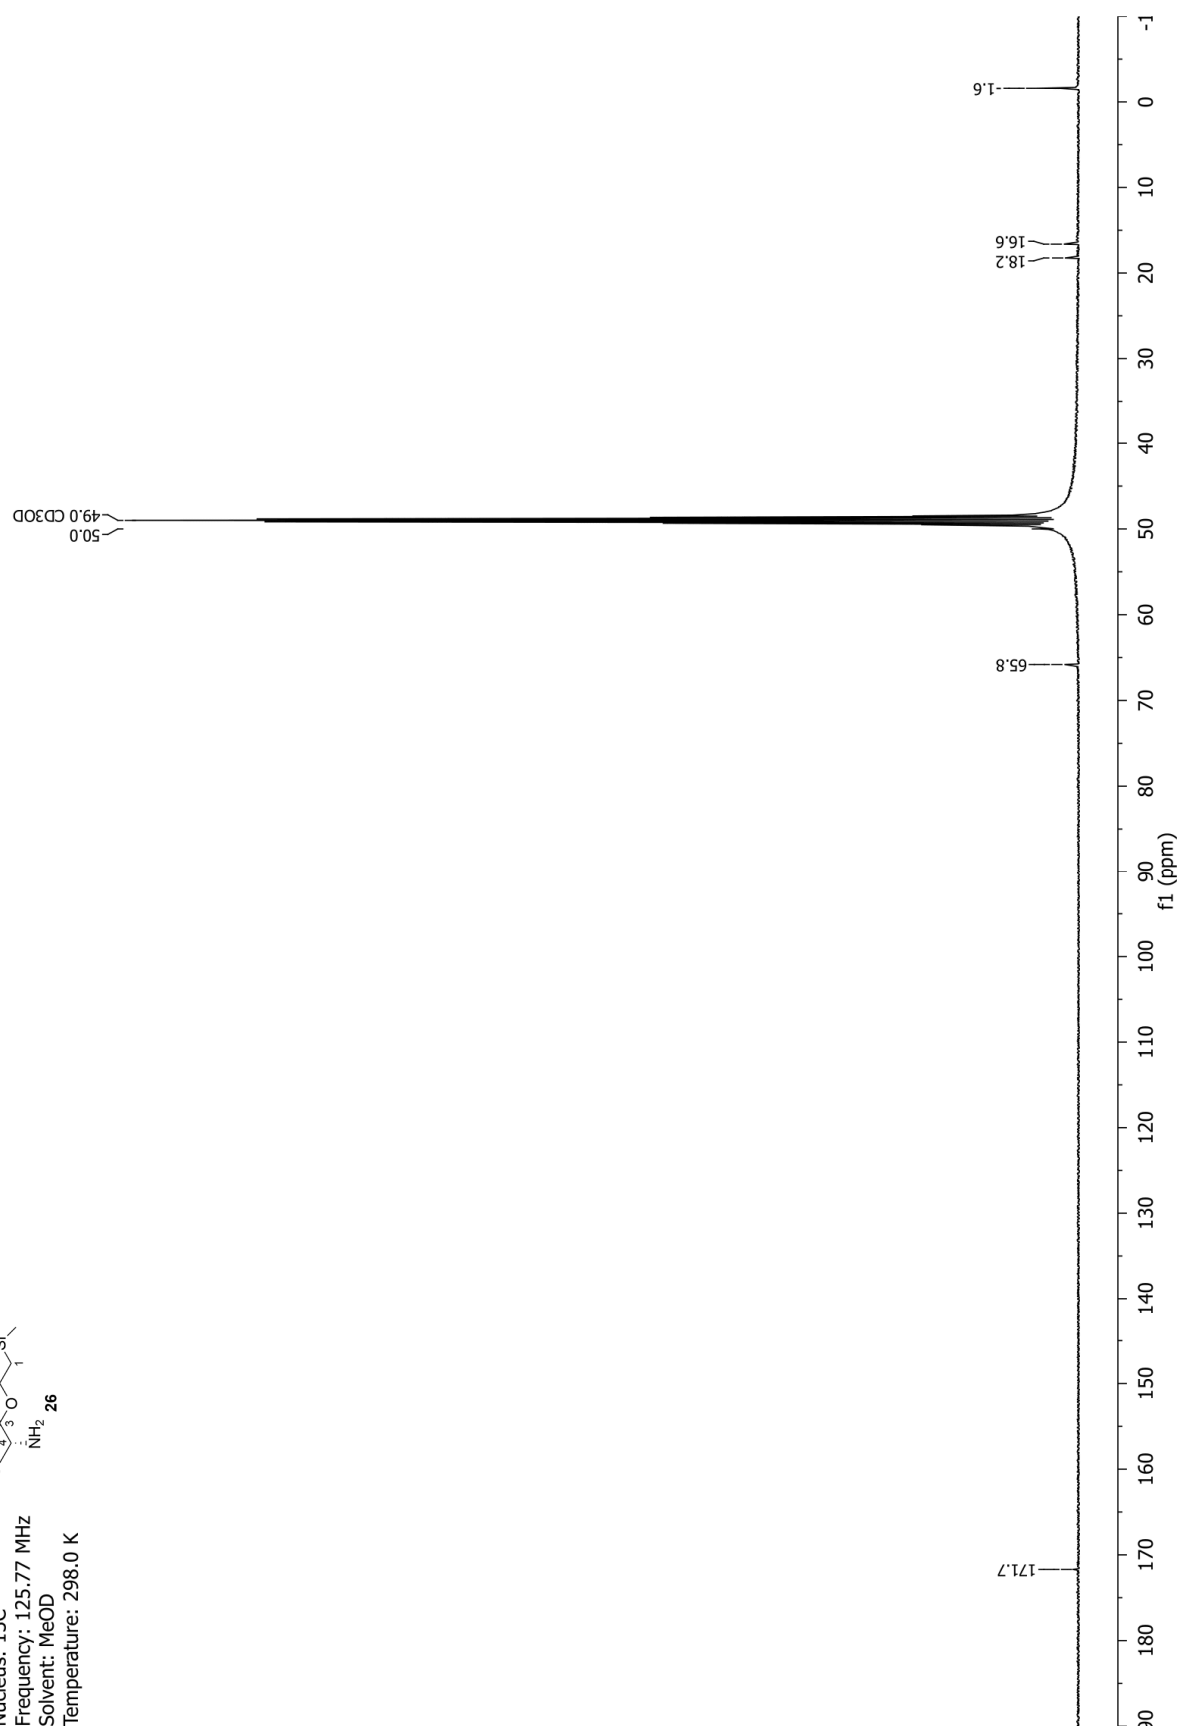



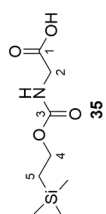

Nucleus:  $^1\text{H}$   
 Frequency: 500.07 MHz  
 Solvent: MeOD  
 Temperature: 298.0 K

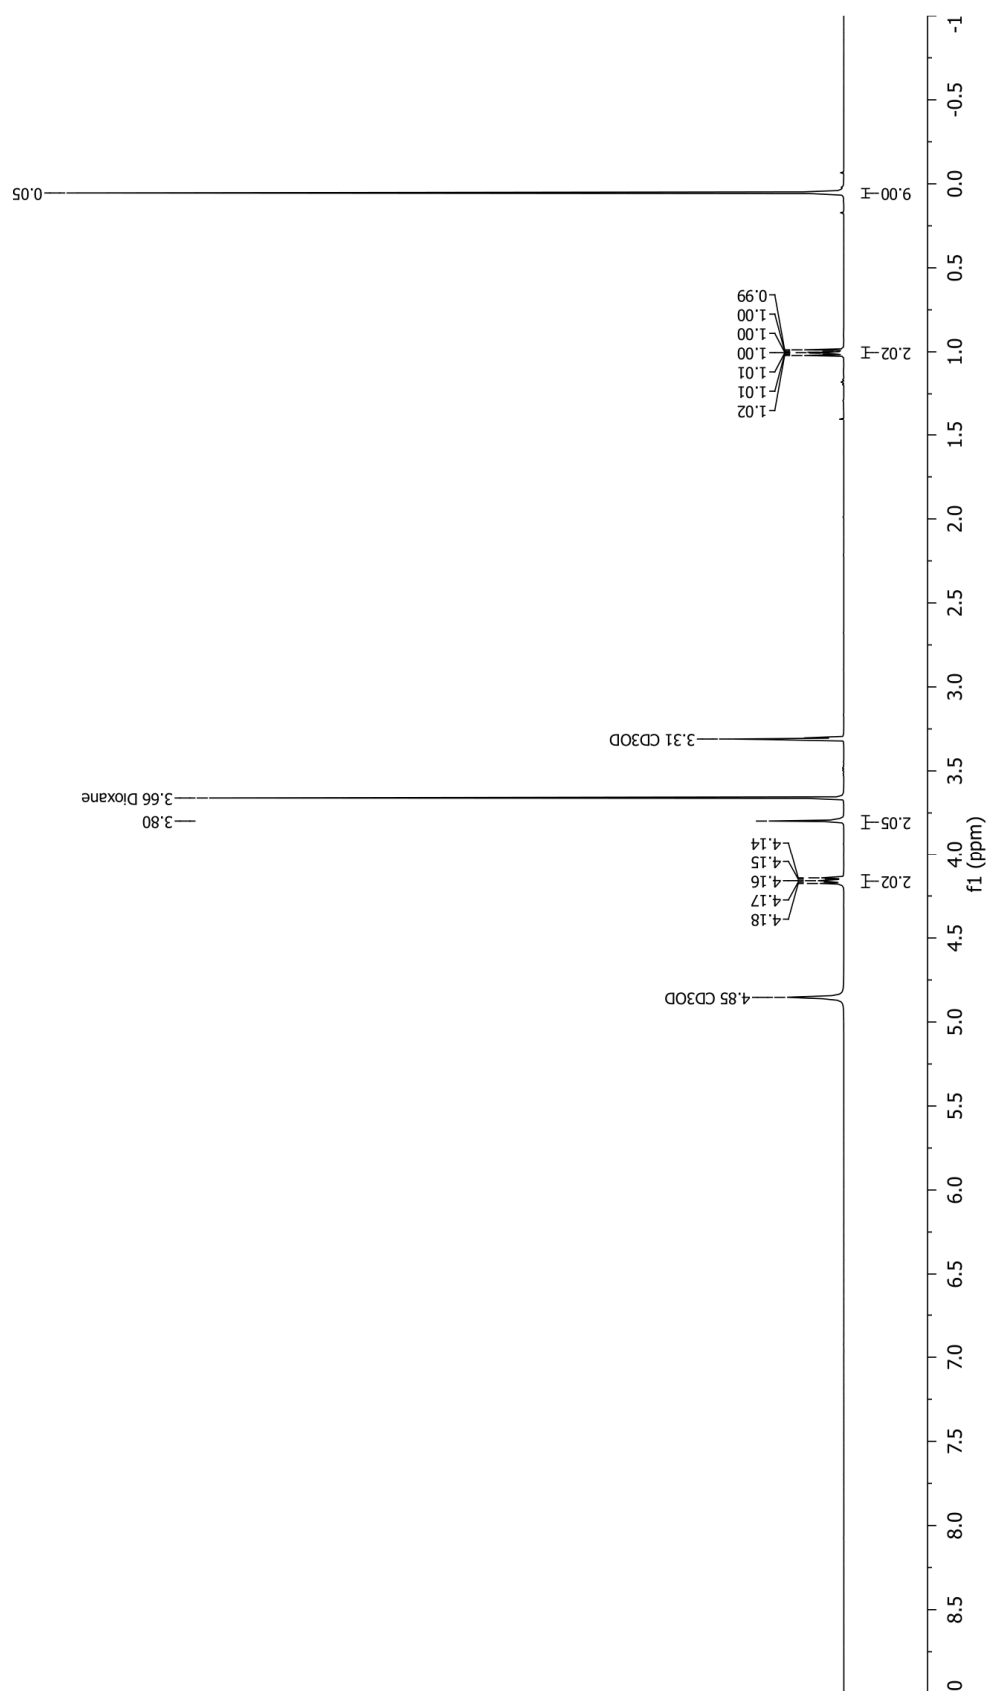

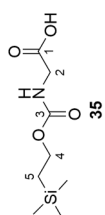

Nucleus:  $^{13}\text{C}$   
 Frequency: 125.76 MHz  
 Solvent: MeOD  
 Temperature: 298.0 K

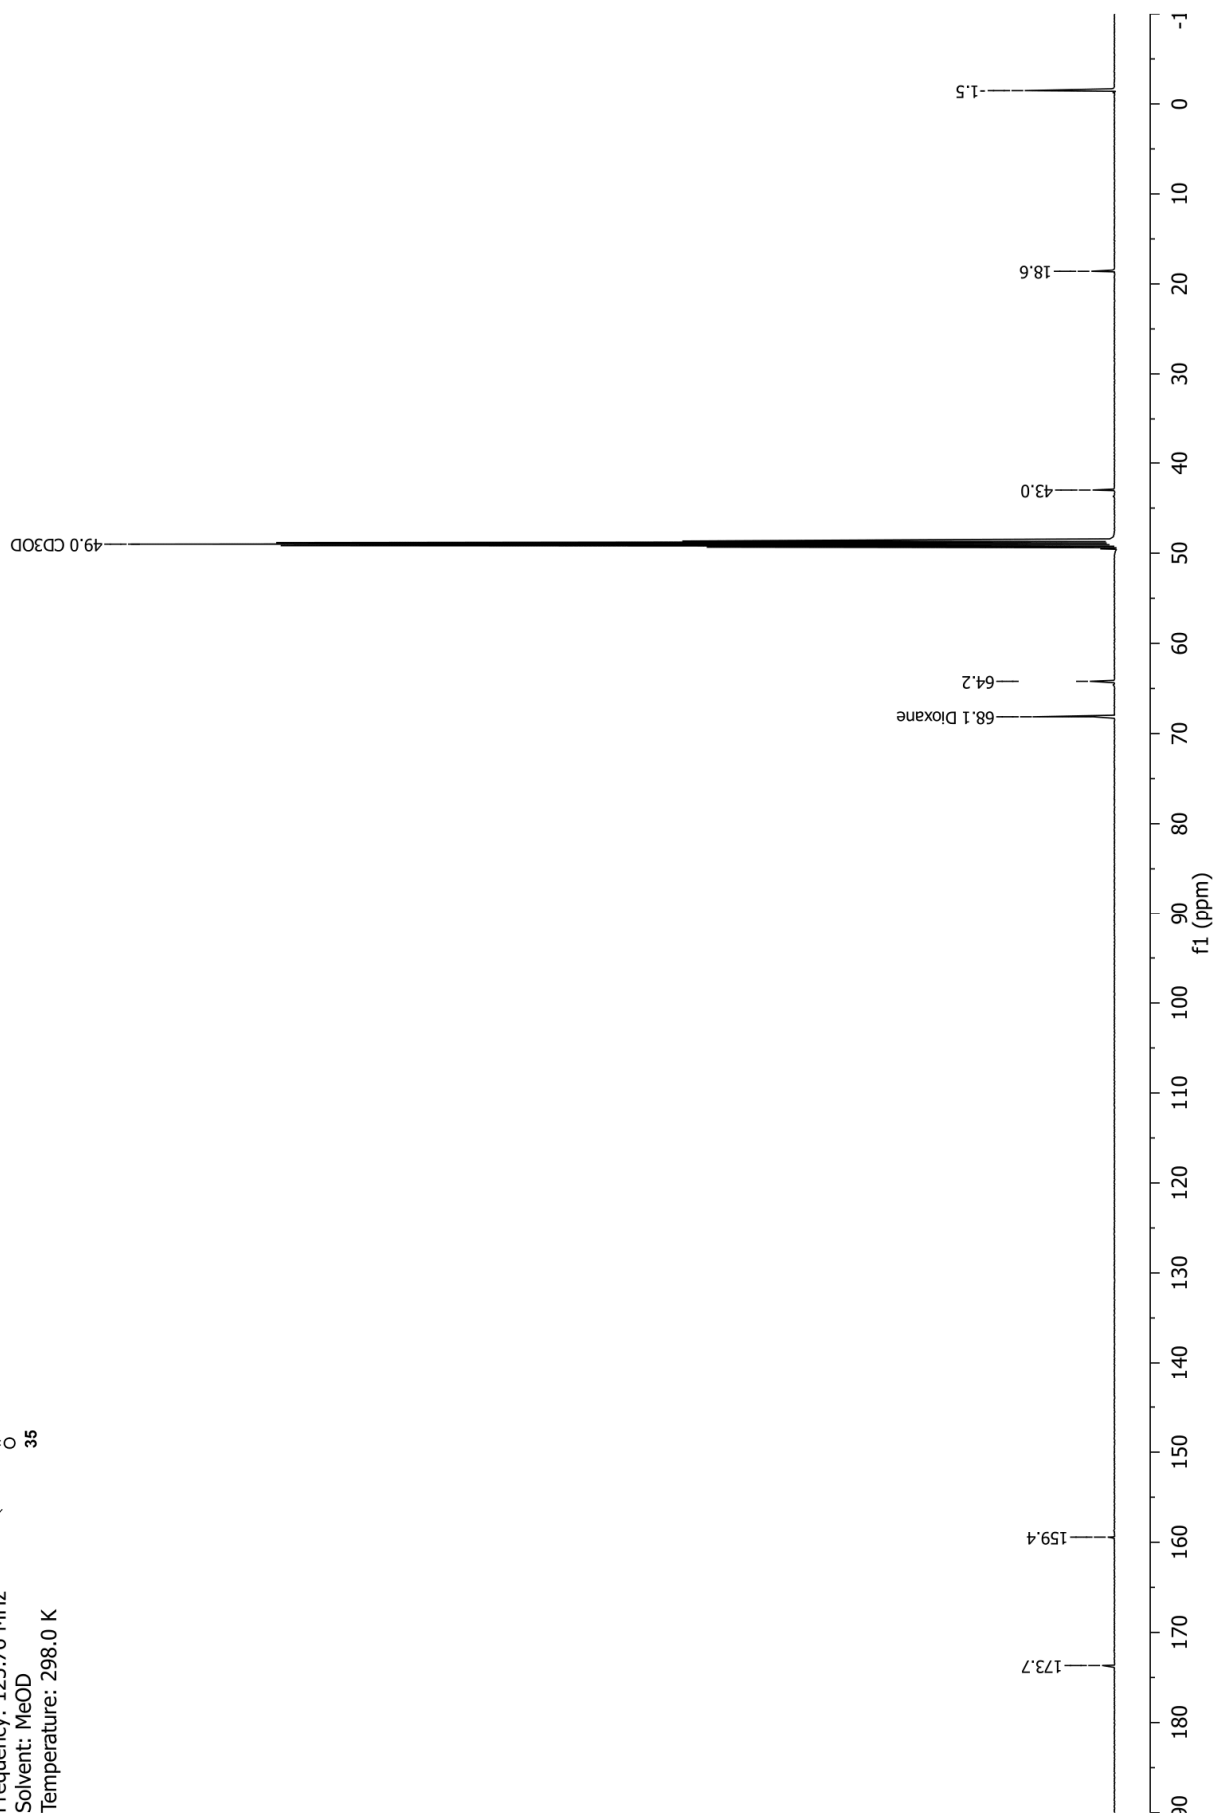

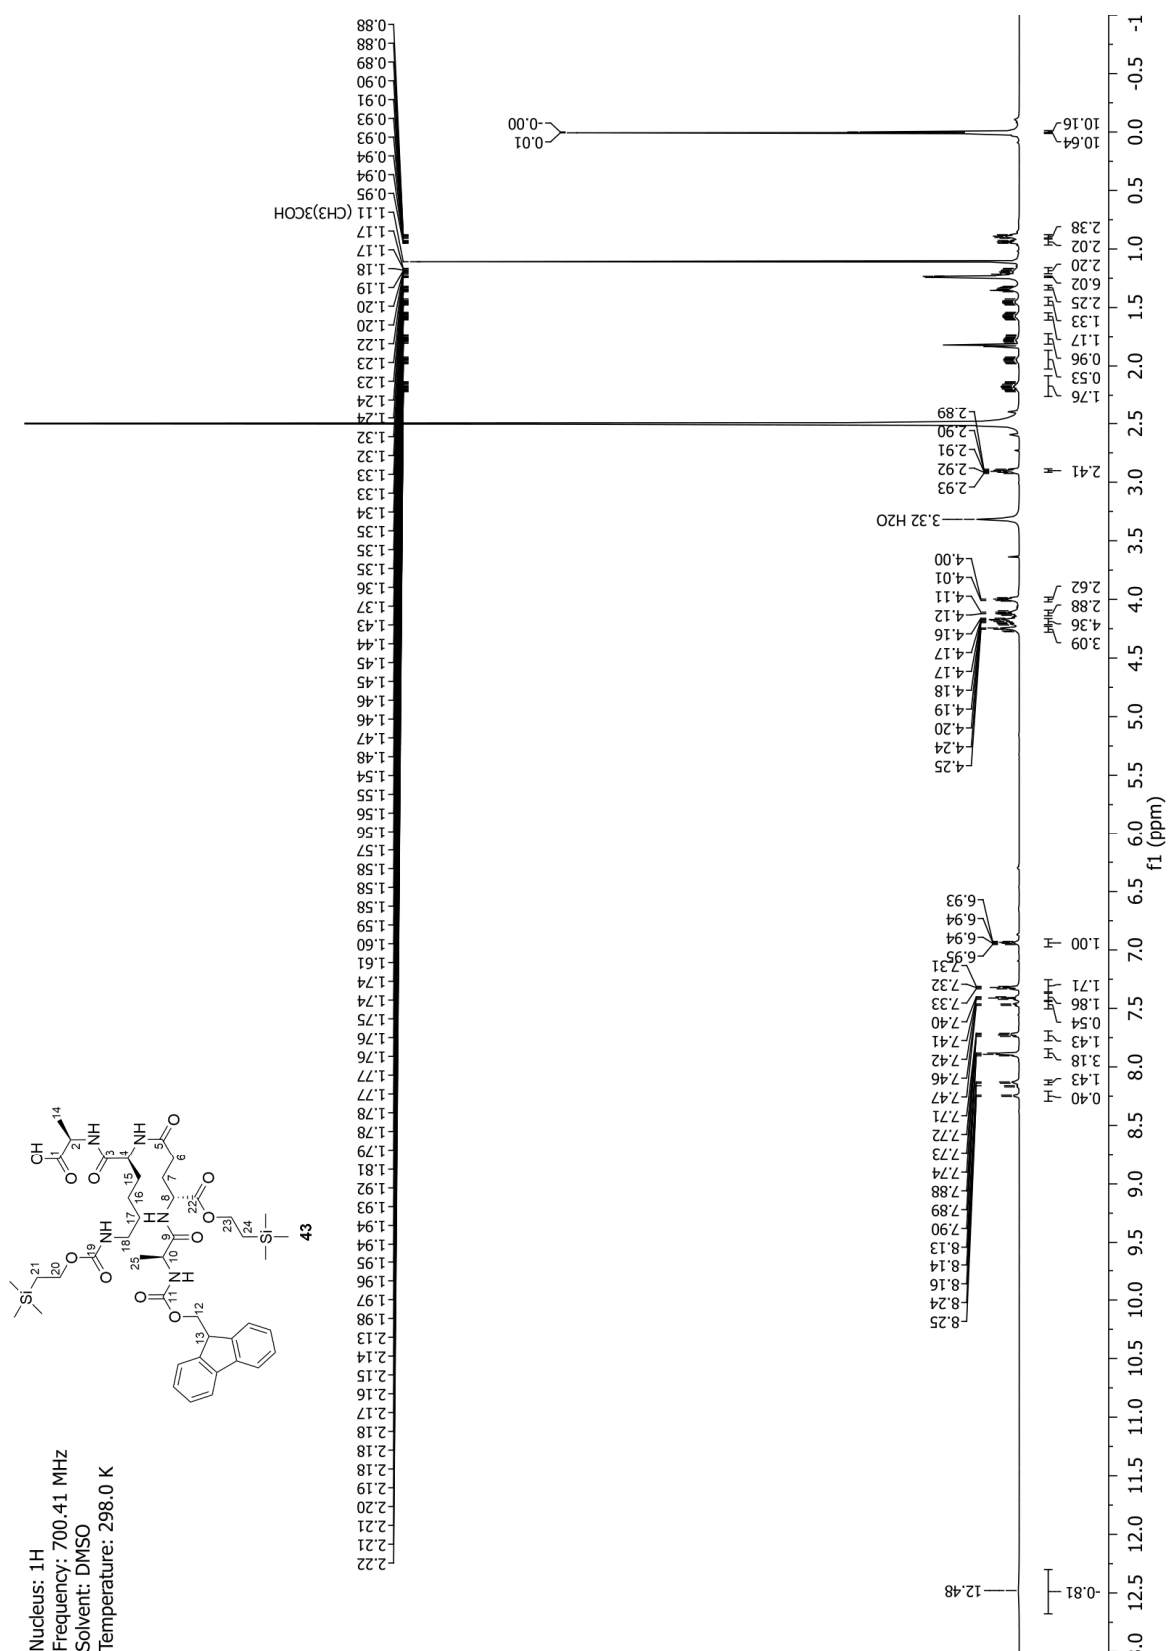

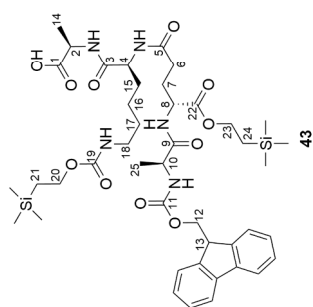

Nucleus:  $^{13}\text{C}$   
 Frequency: 176.14 MHz  
 Solvent: DMSO  
 Temperature: 298.0 K

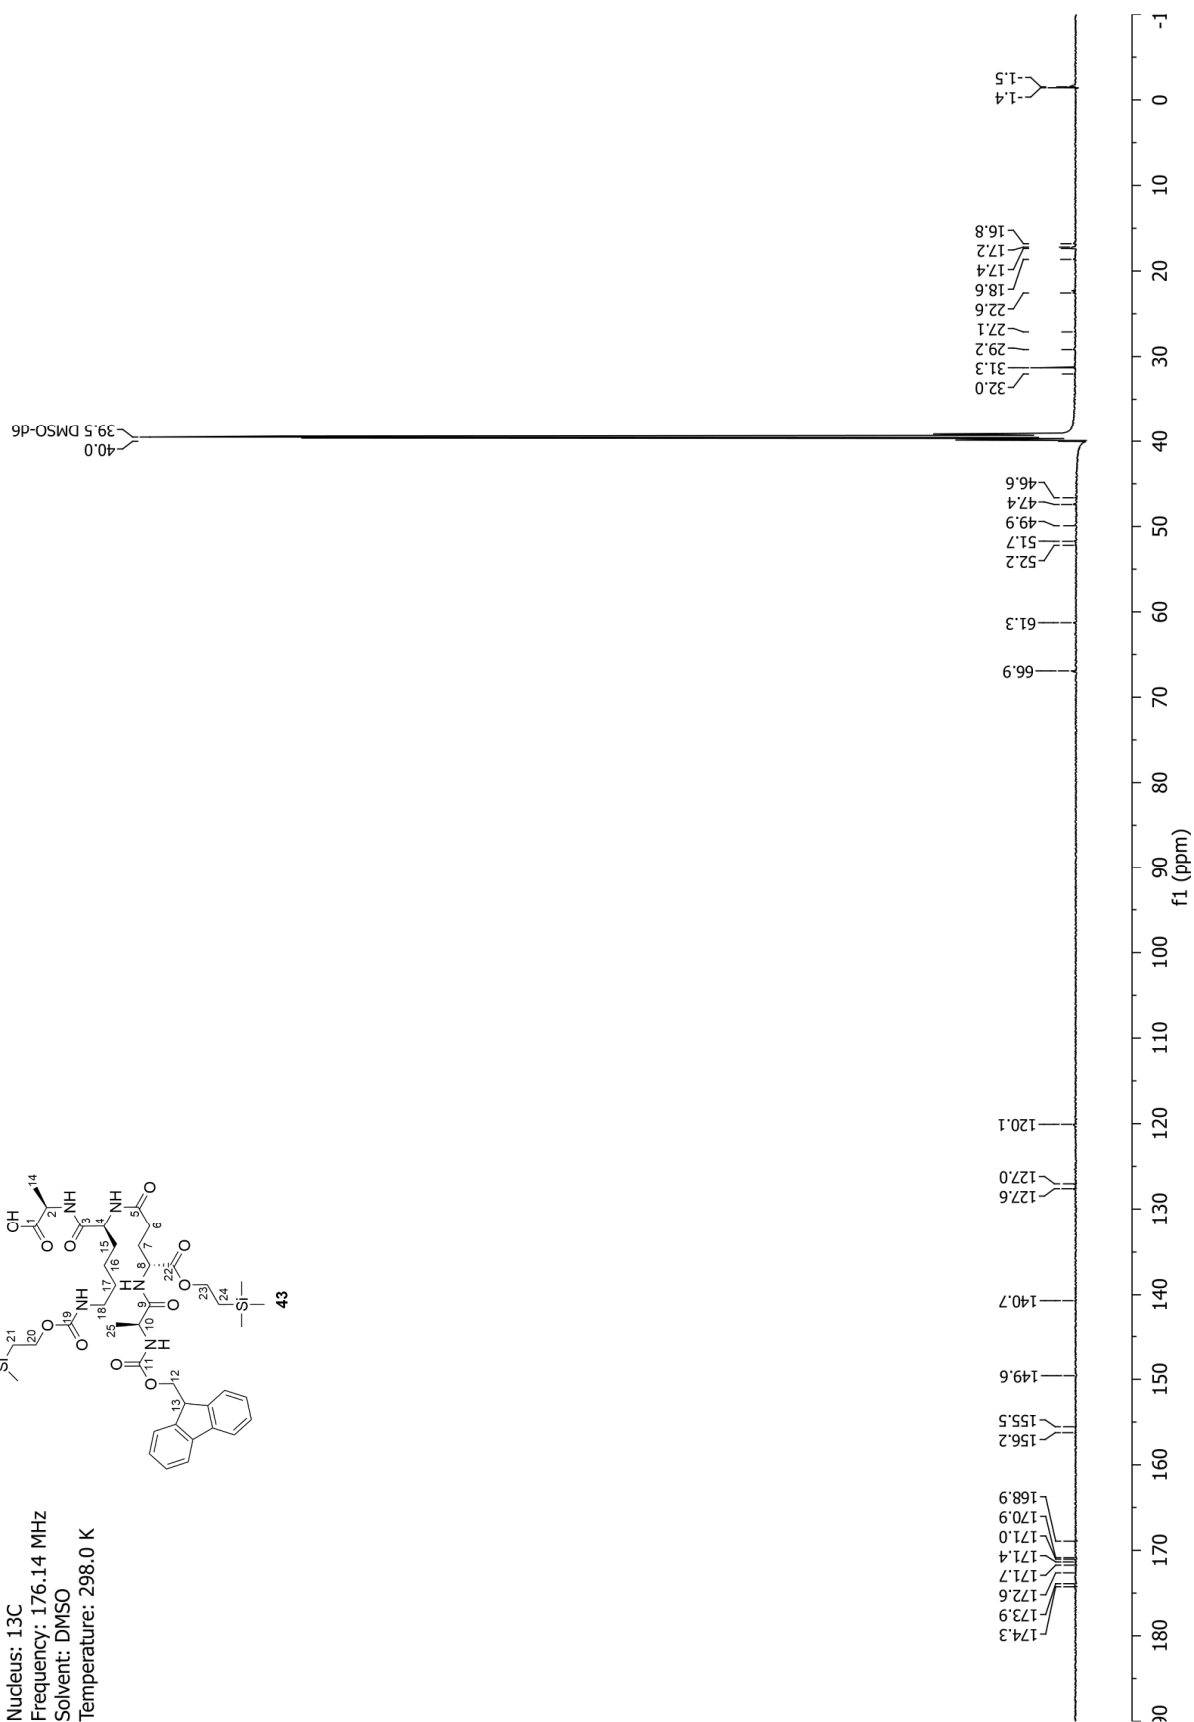

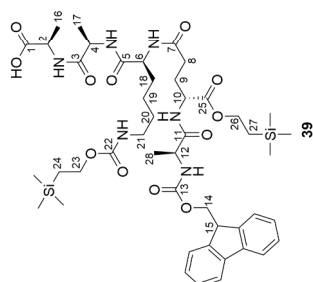

Nucleus:  $^1\text{H}$   
 Frequency: 500.13 MHz  
 Solvent: DMSO  
 Temperature: 298.0 K

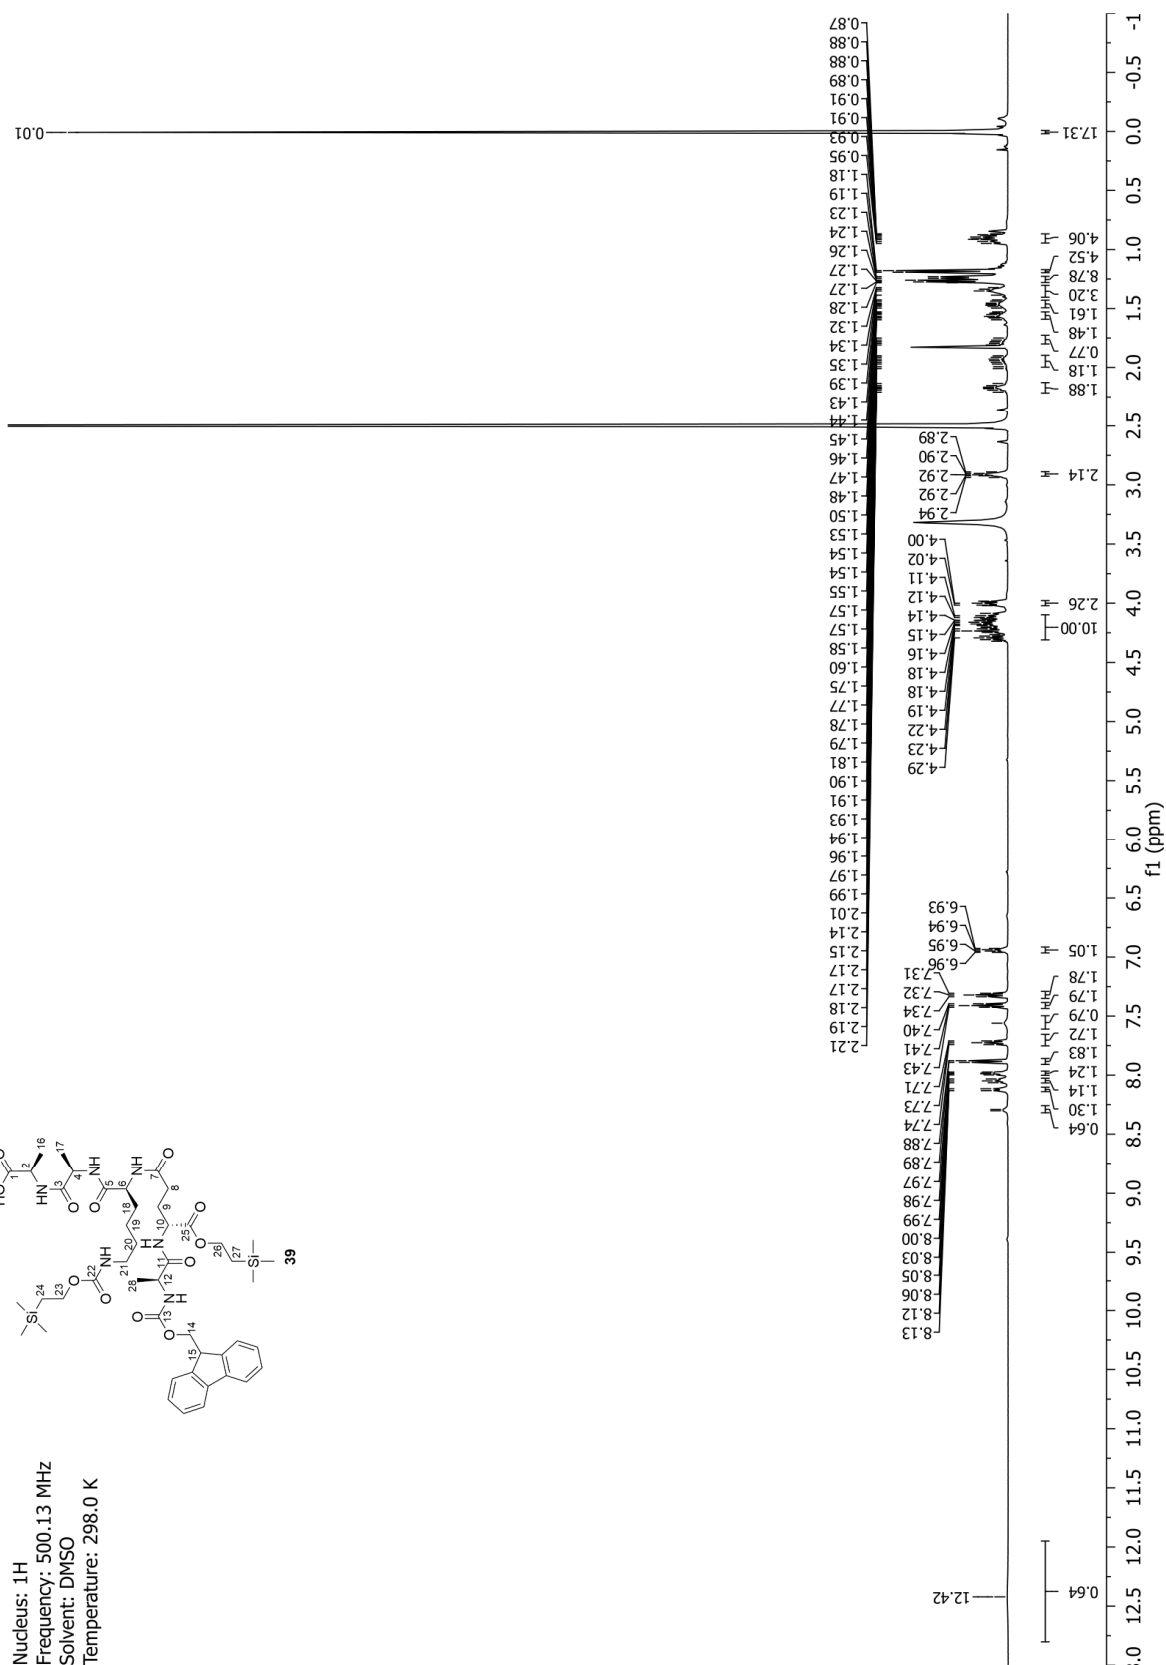

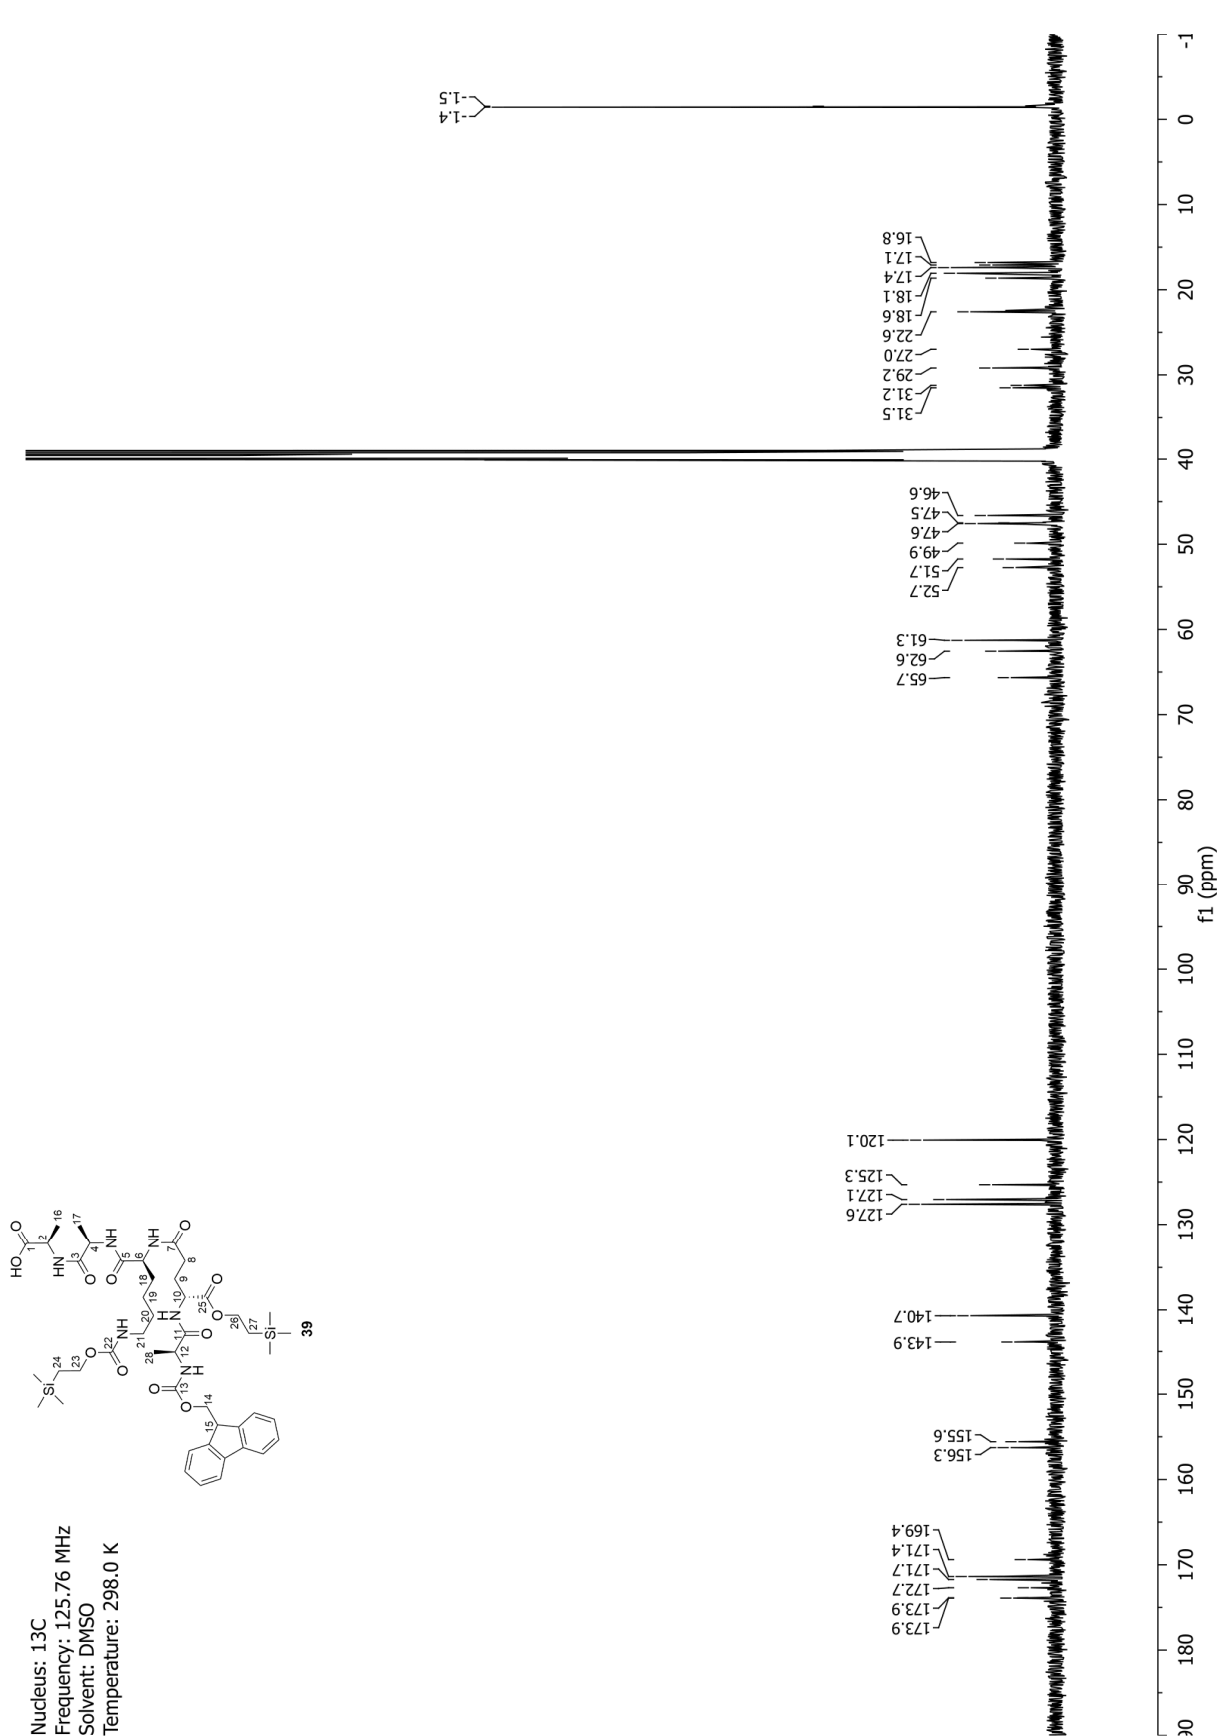

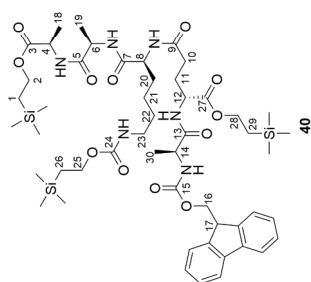

Nucleus:  $^1\text{H}$   
 Frequency: 700.41 MHz  
 Solvent: DMSO  
 Temperature: 298.0 K

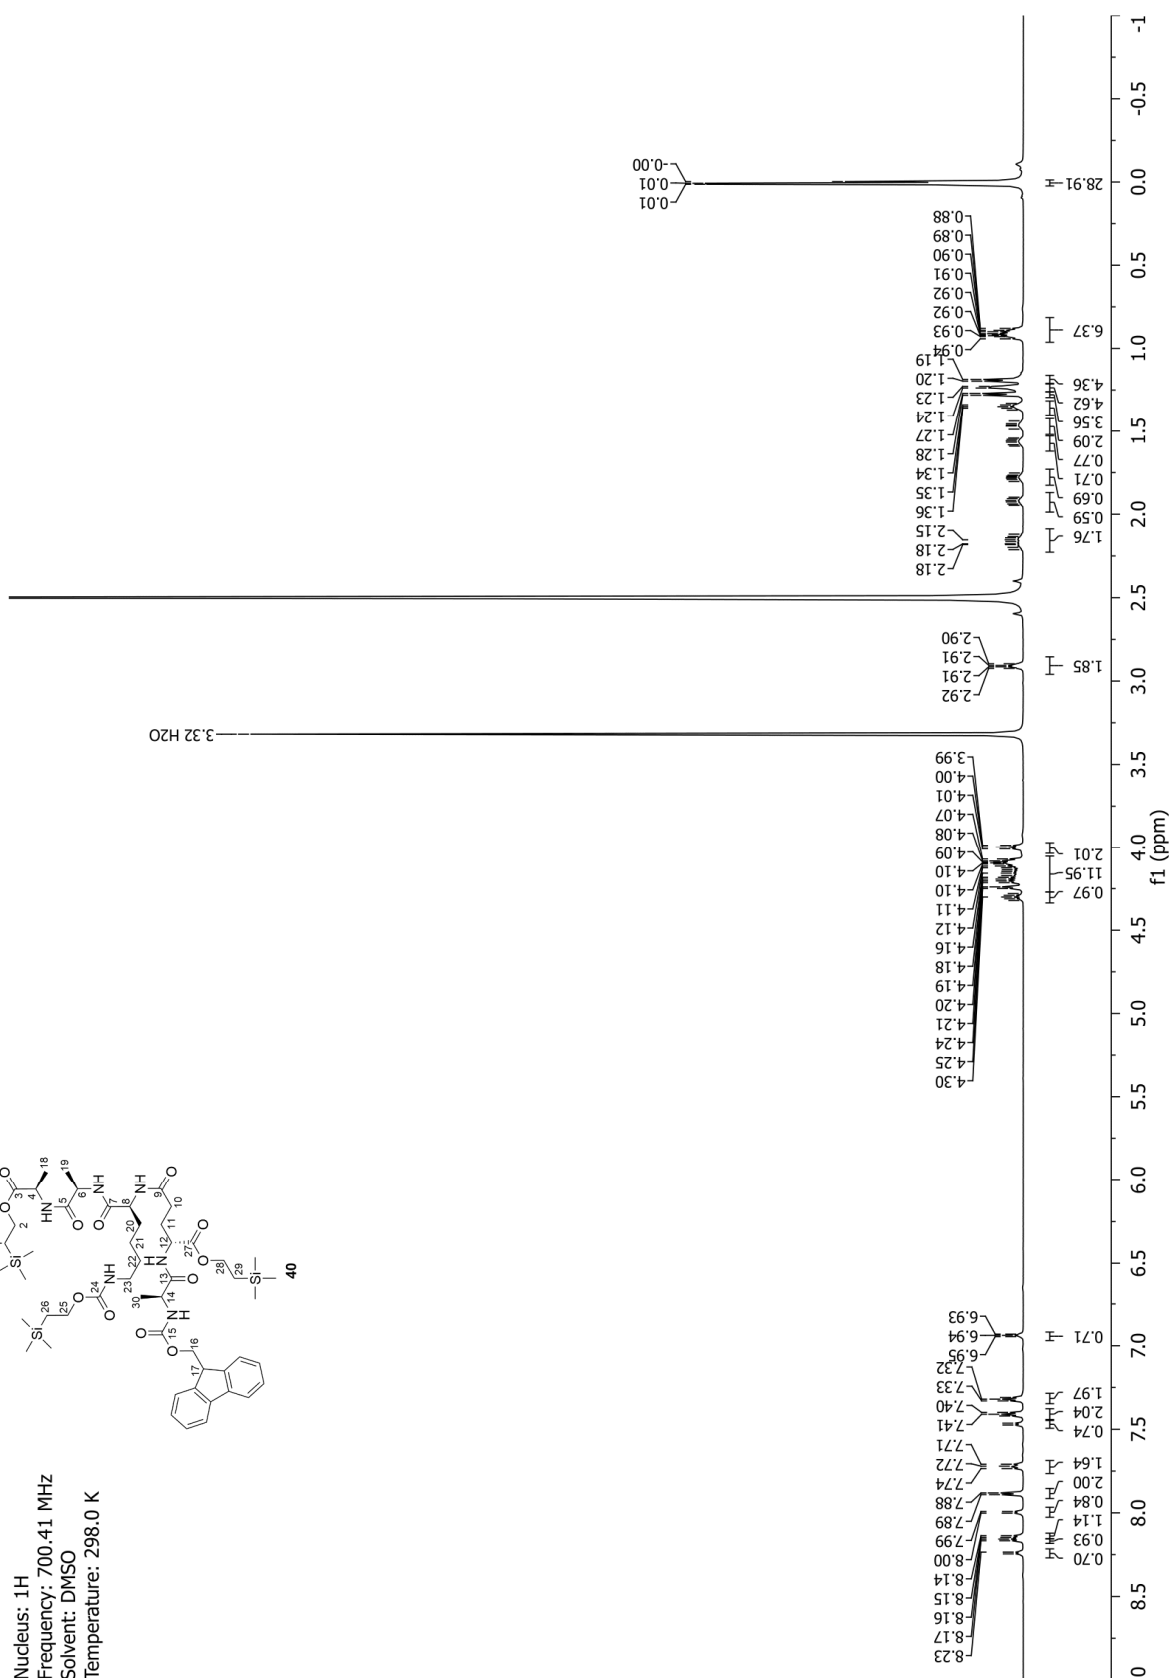

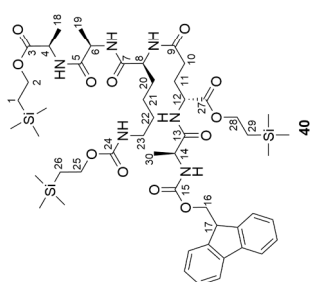

Nucleus:  $^{13}\text{C}$   
 Frequency: 176.12 MHz  
 Solvent: DMSO  
 Temperature: 298.0 K

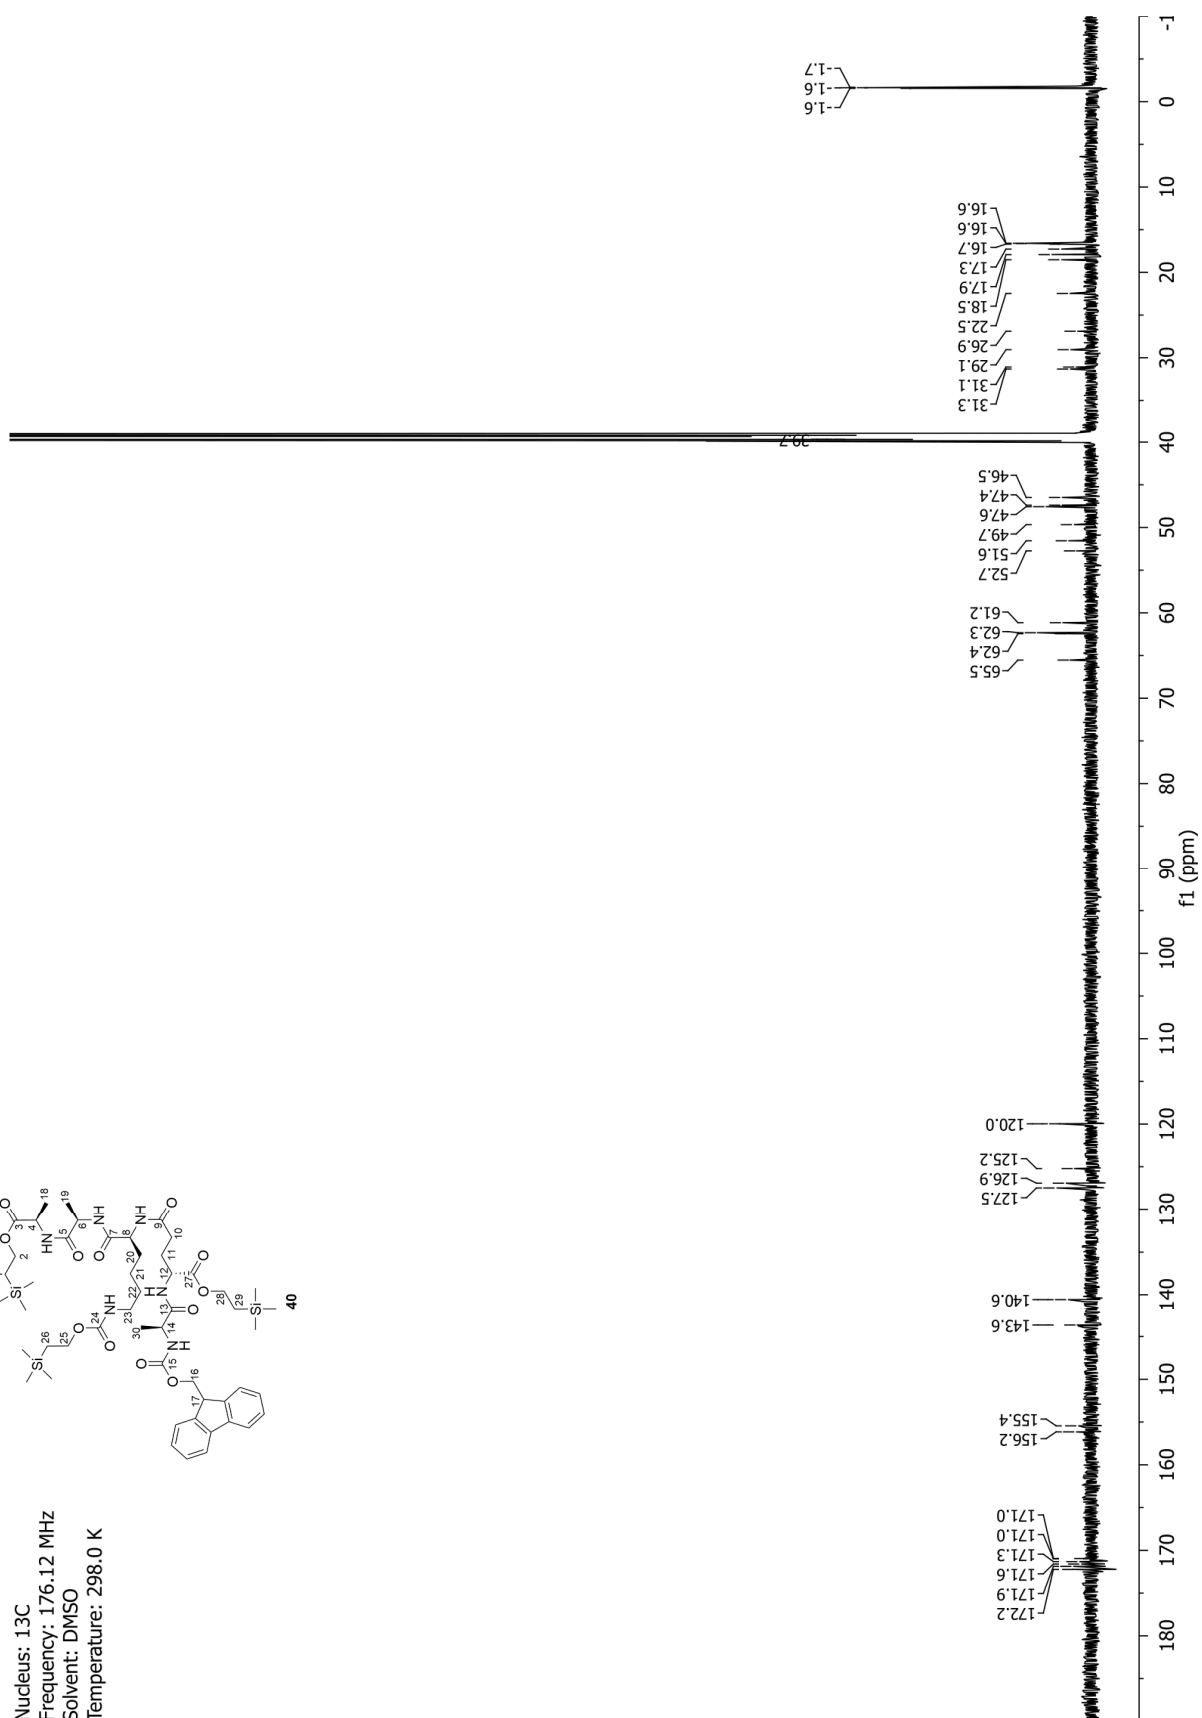



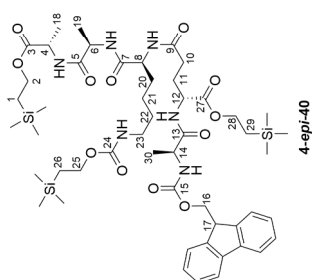

Nucleus:  $^1\text{H}$   
 Frequency: 700.41 MHz  
 Solvent: MeOD  
 Temperature: 298.0 K

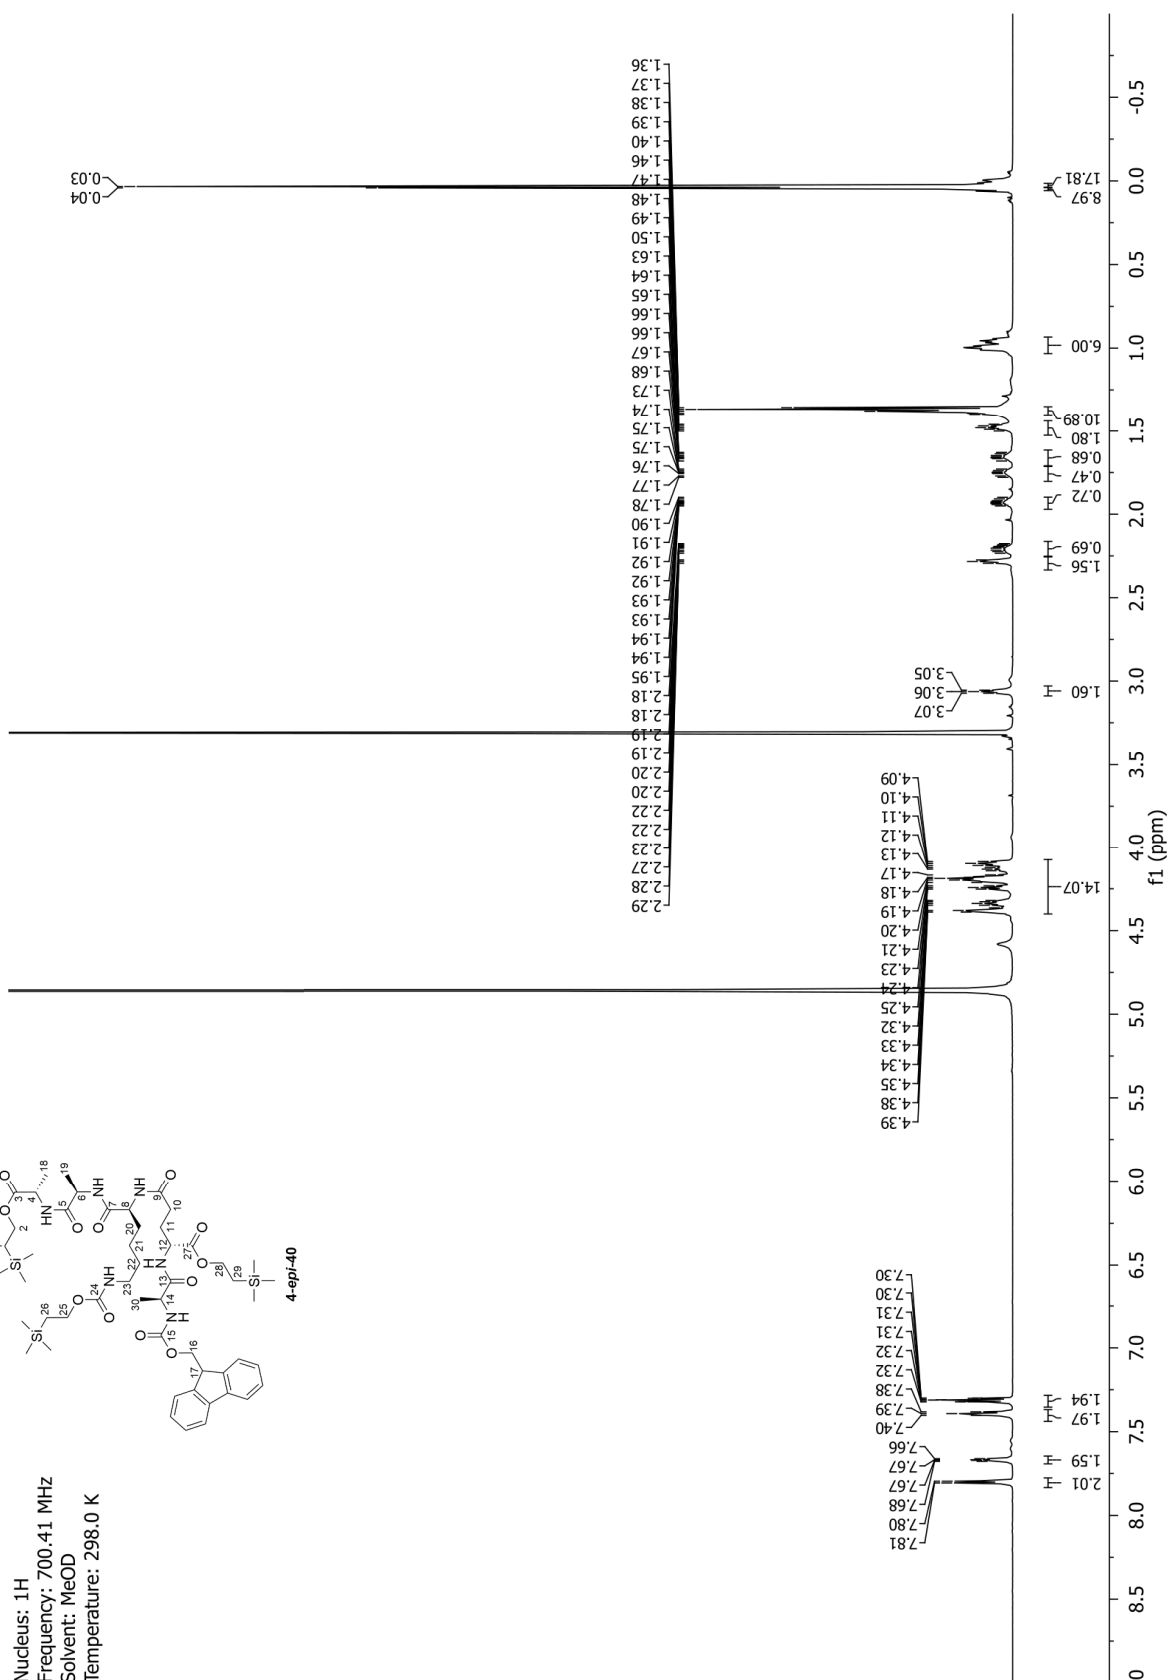

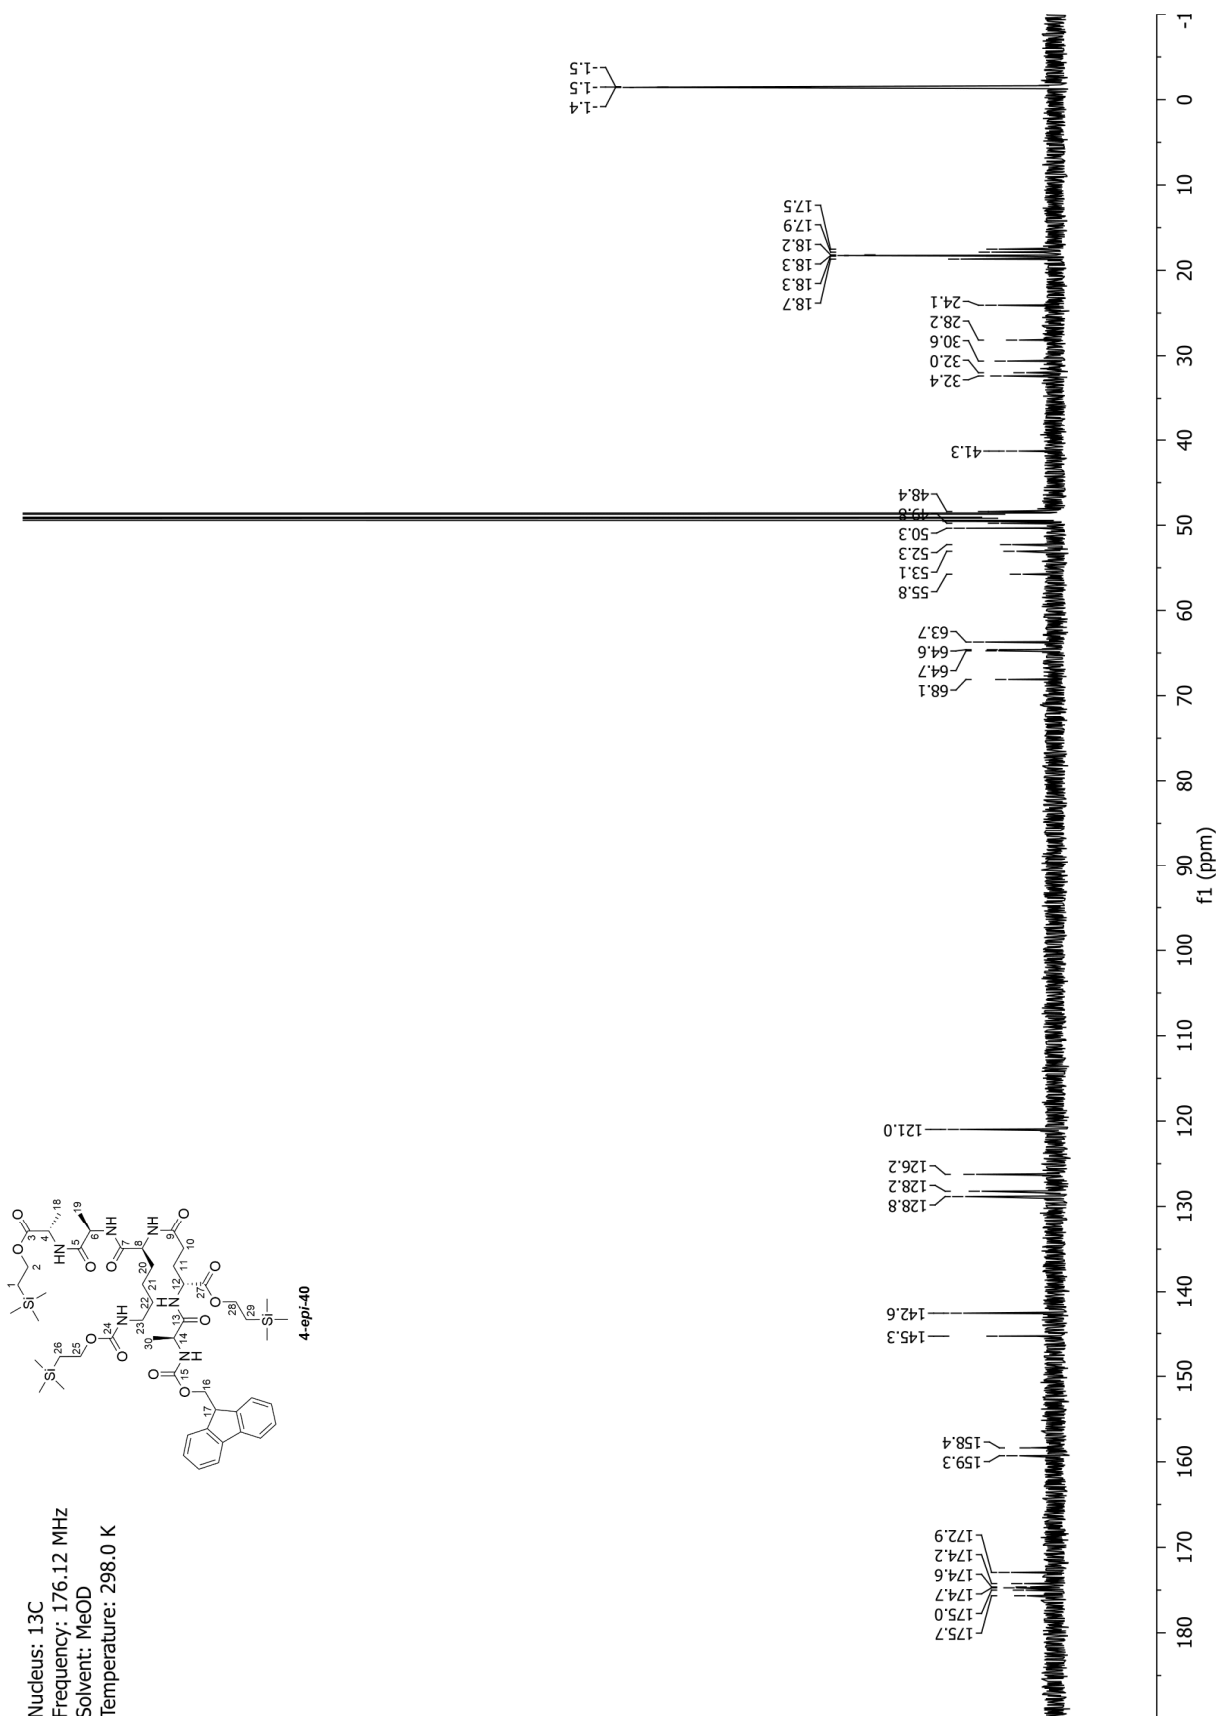

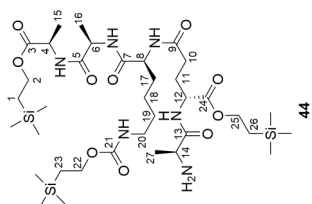

Nucleus:  $^1\text{H}$   
 Frequency: 700.41 MHz  
 Solvent: DMSO  
 Temperature: 298.0 K

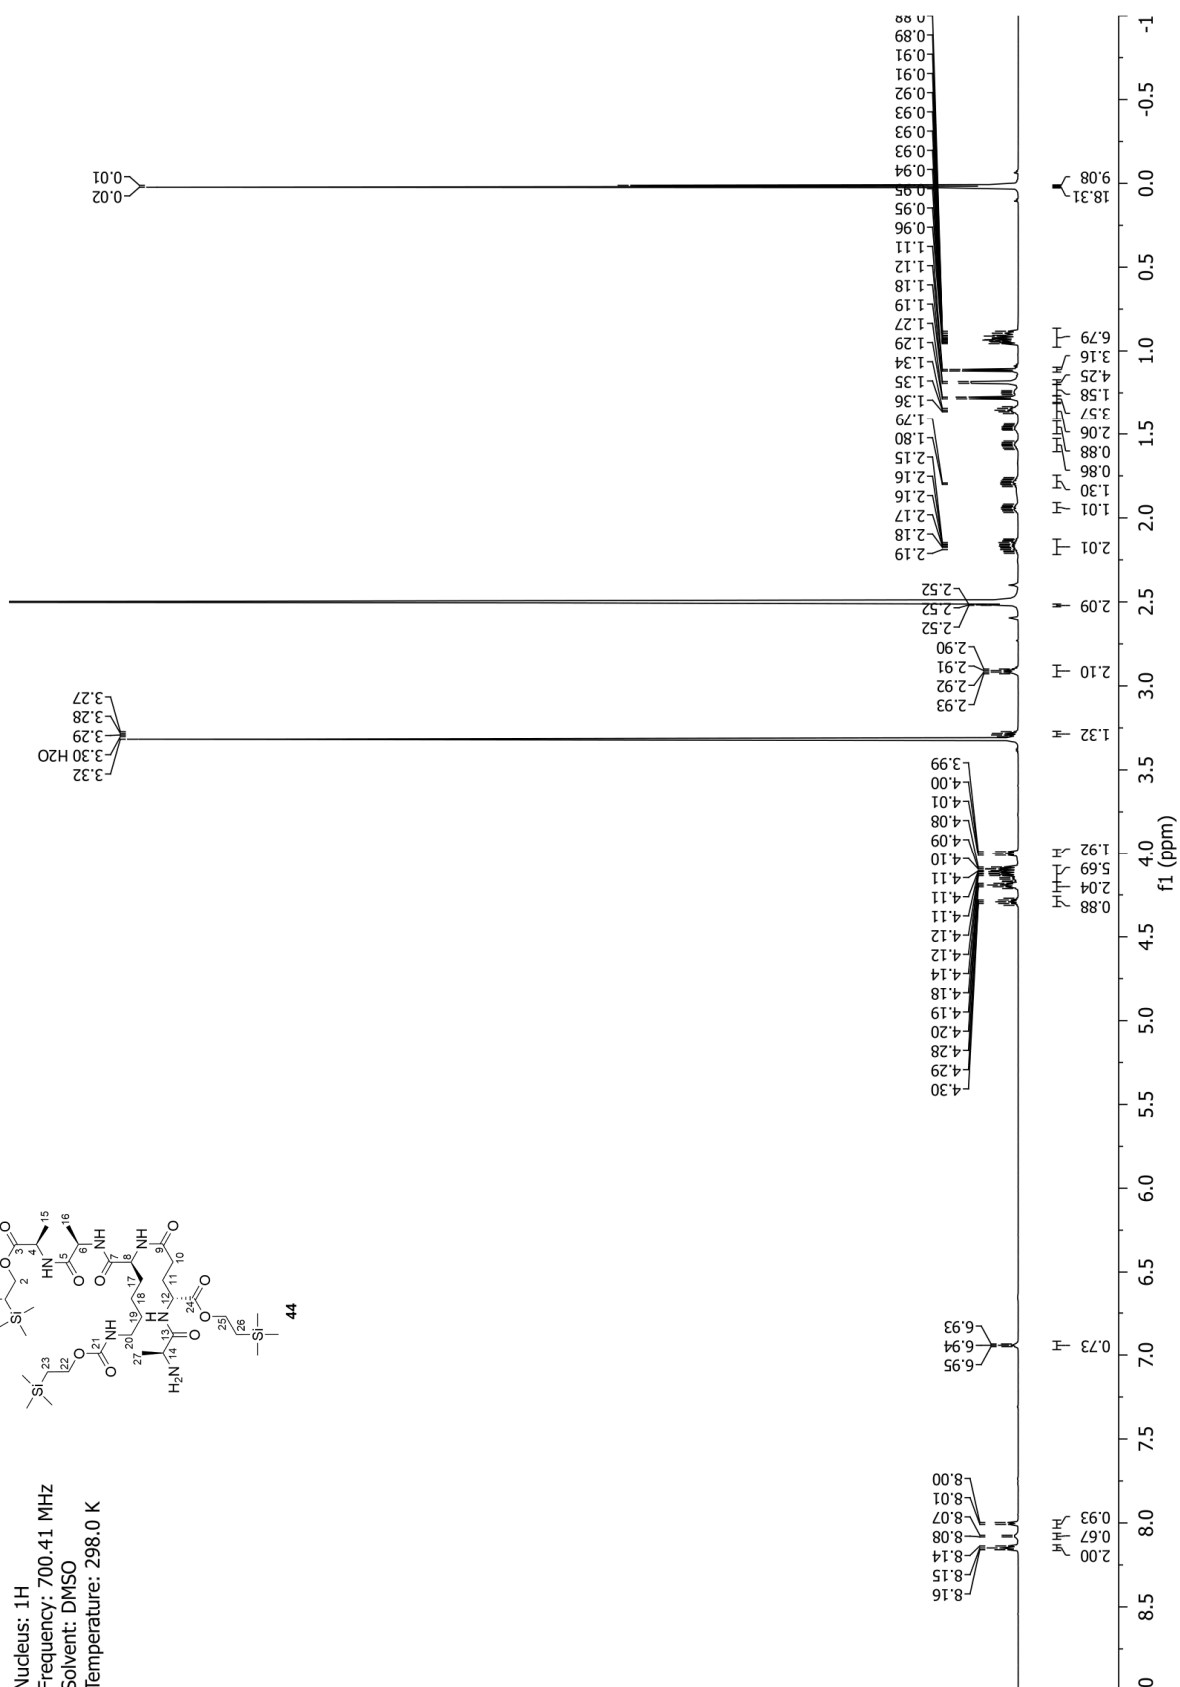

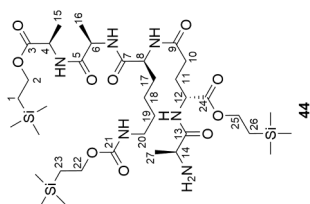

Nucleus:  $^{13}\text{C}$   
 Frequency: 176.12 MHz  
 Solvent: DMSO  
 Temperature: 298.0 K

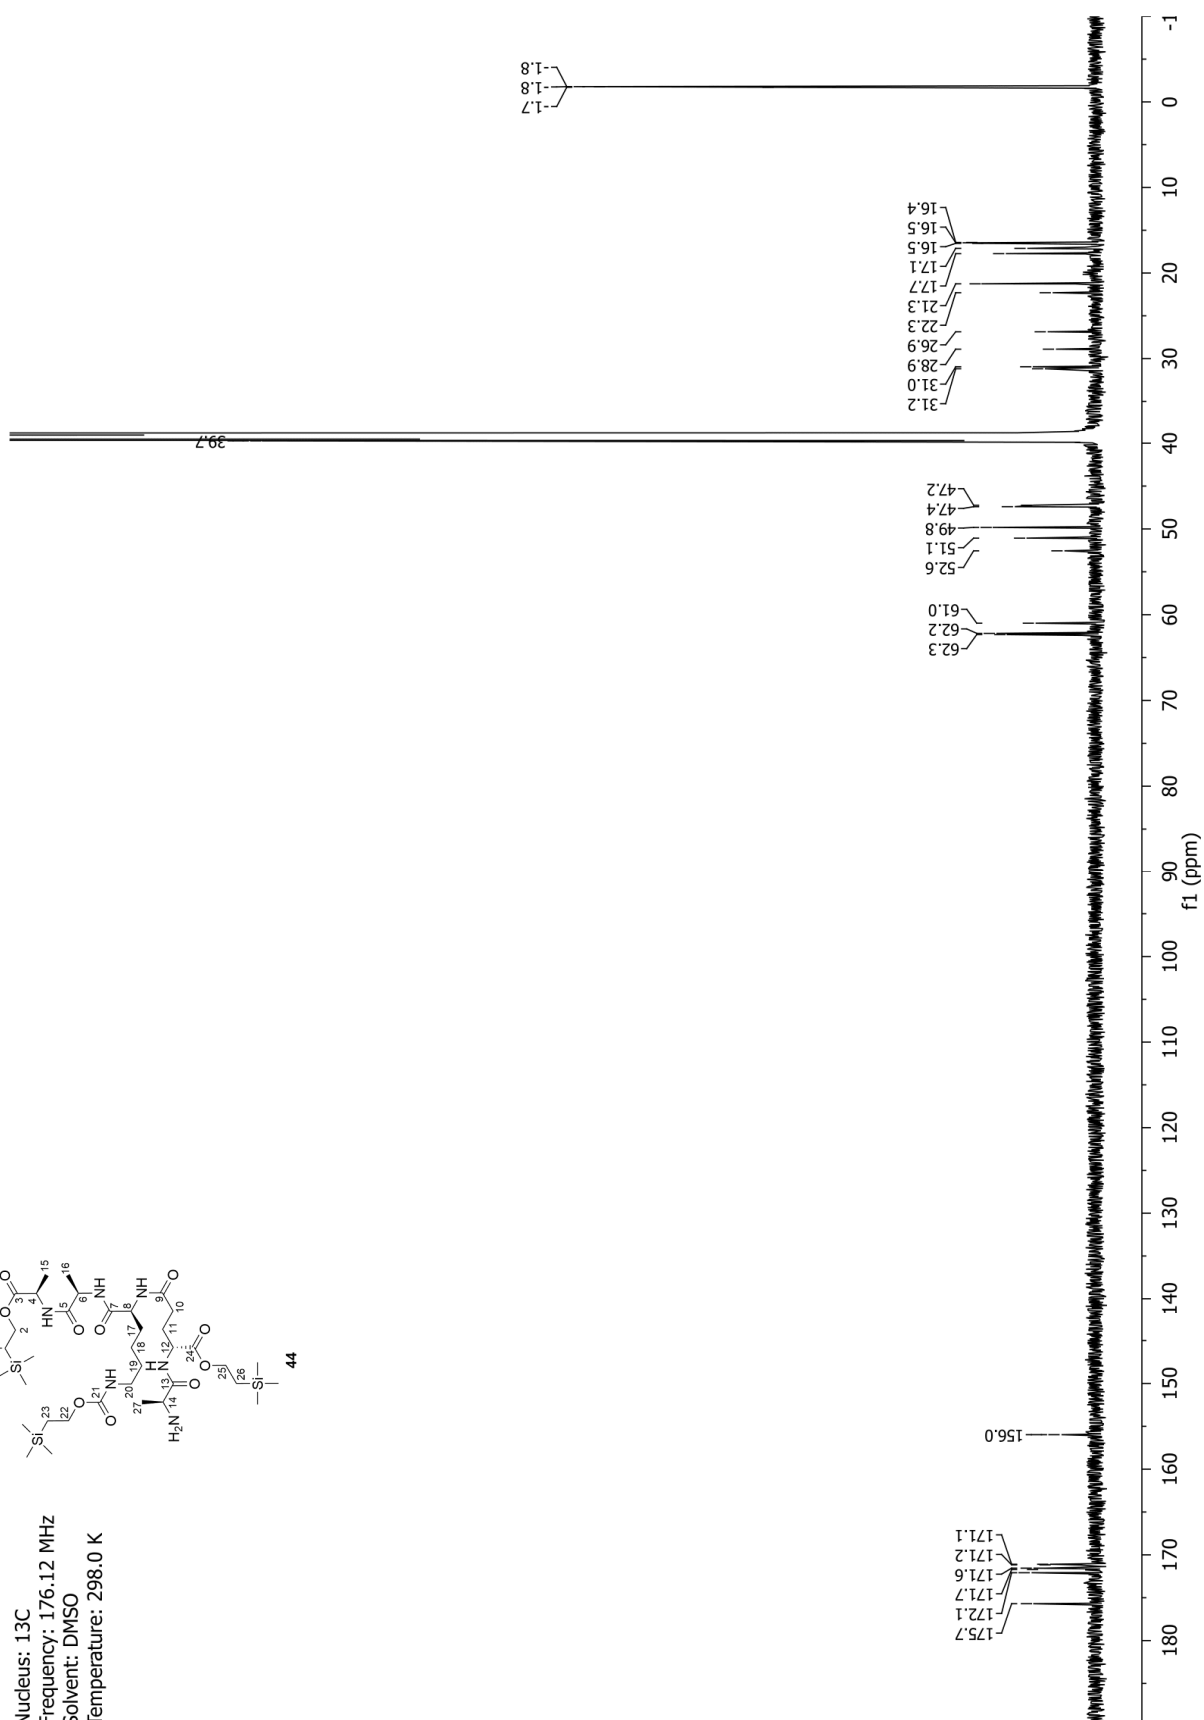

Nucleus:  $^1\text{H}$   
Frequency: 700.41 MHz  
Solvent: DMSO  
Temperature: 298.0 K

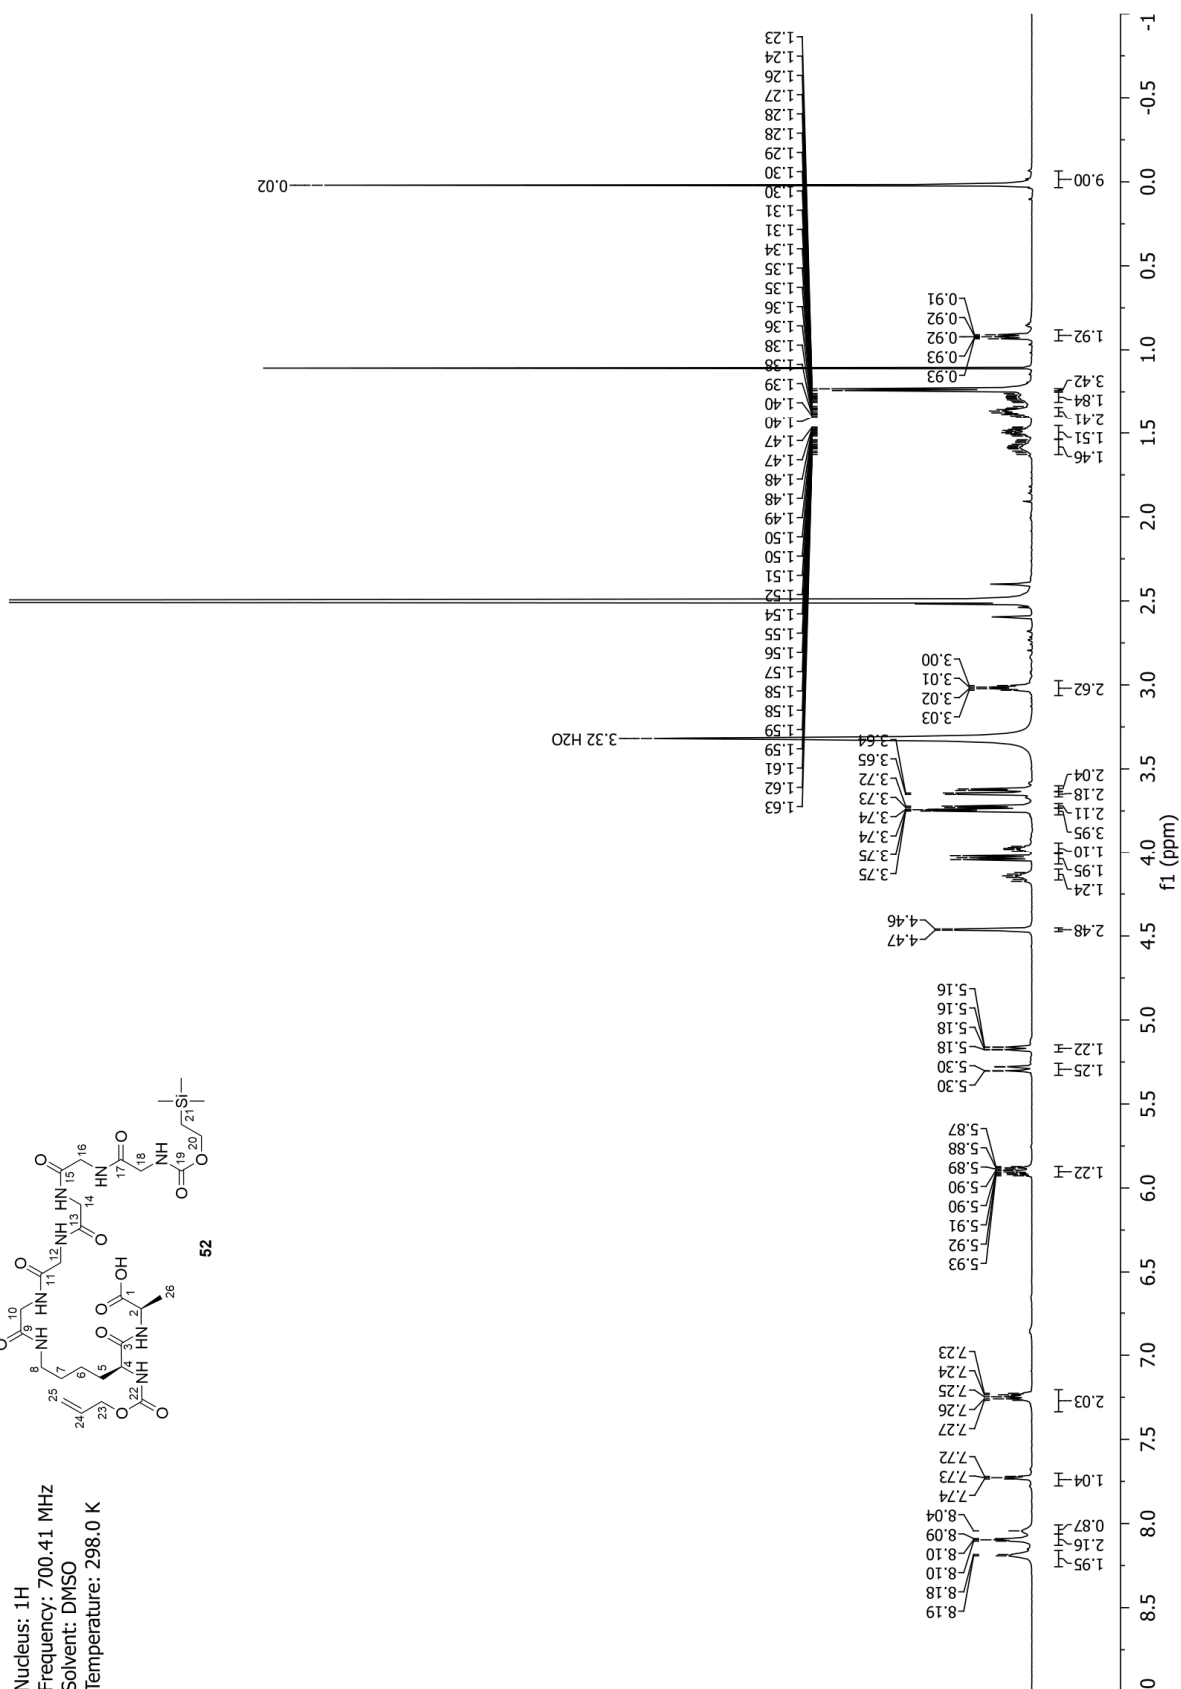

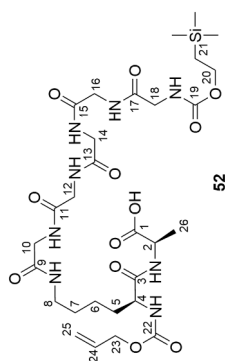

Nucleus:  $^{13}\text{C}$   
 Frequency: 176.12 MHz  
 Solvent: DMSO  
 Temperature: 298.0 K

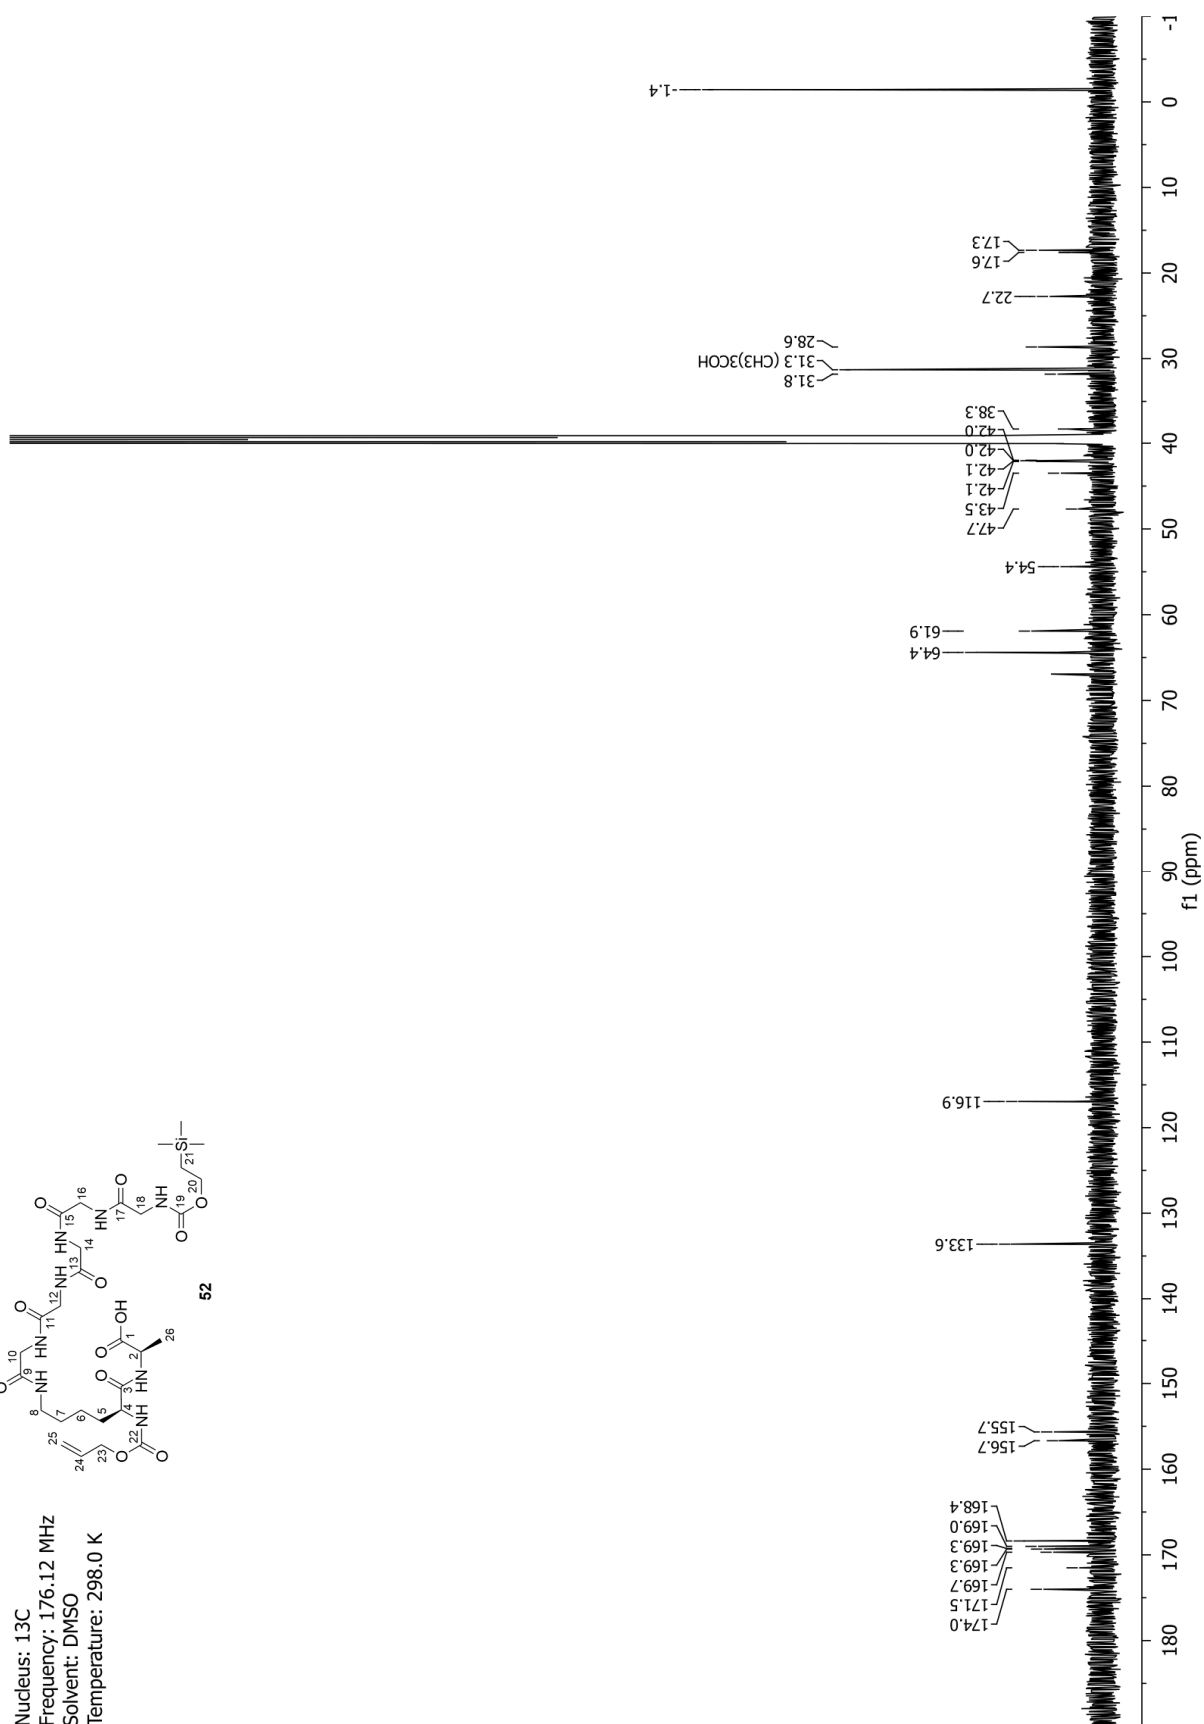

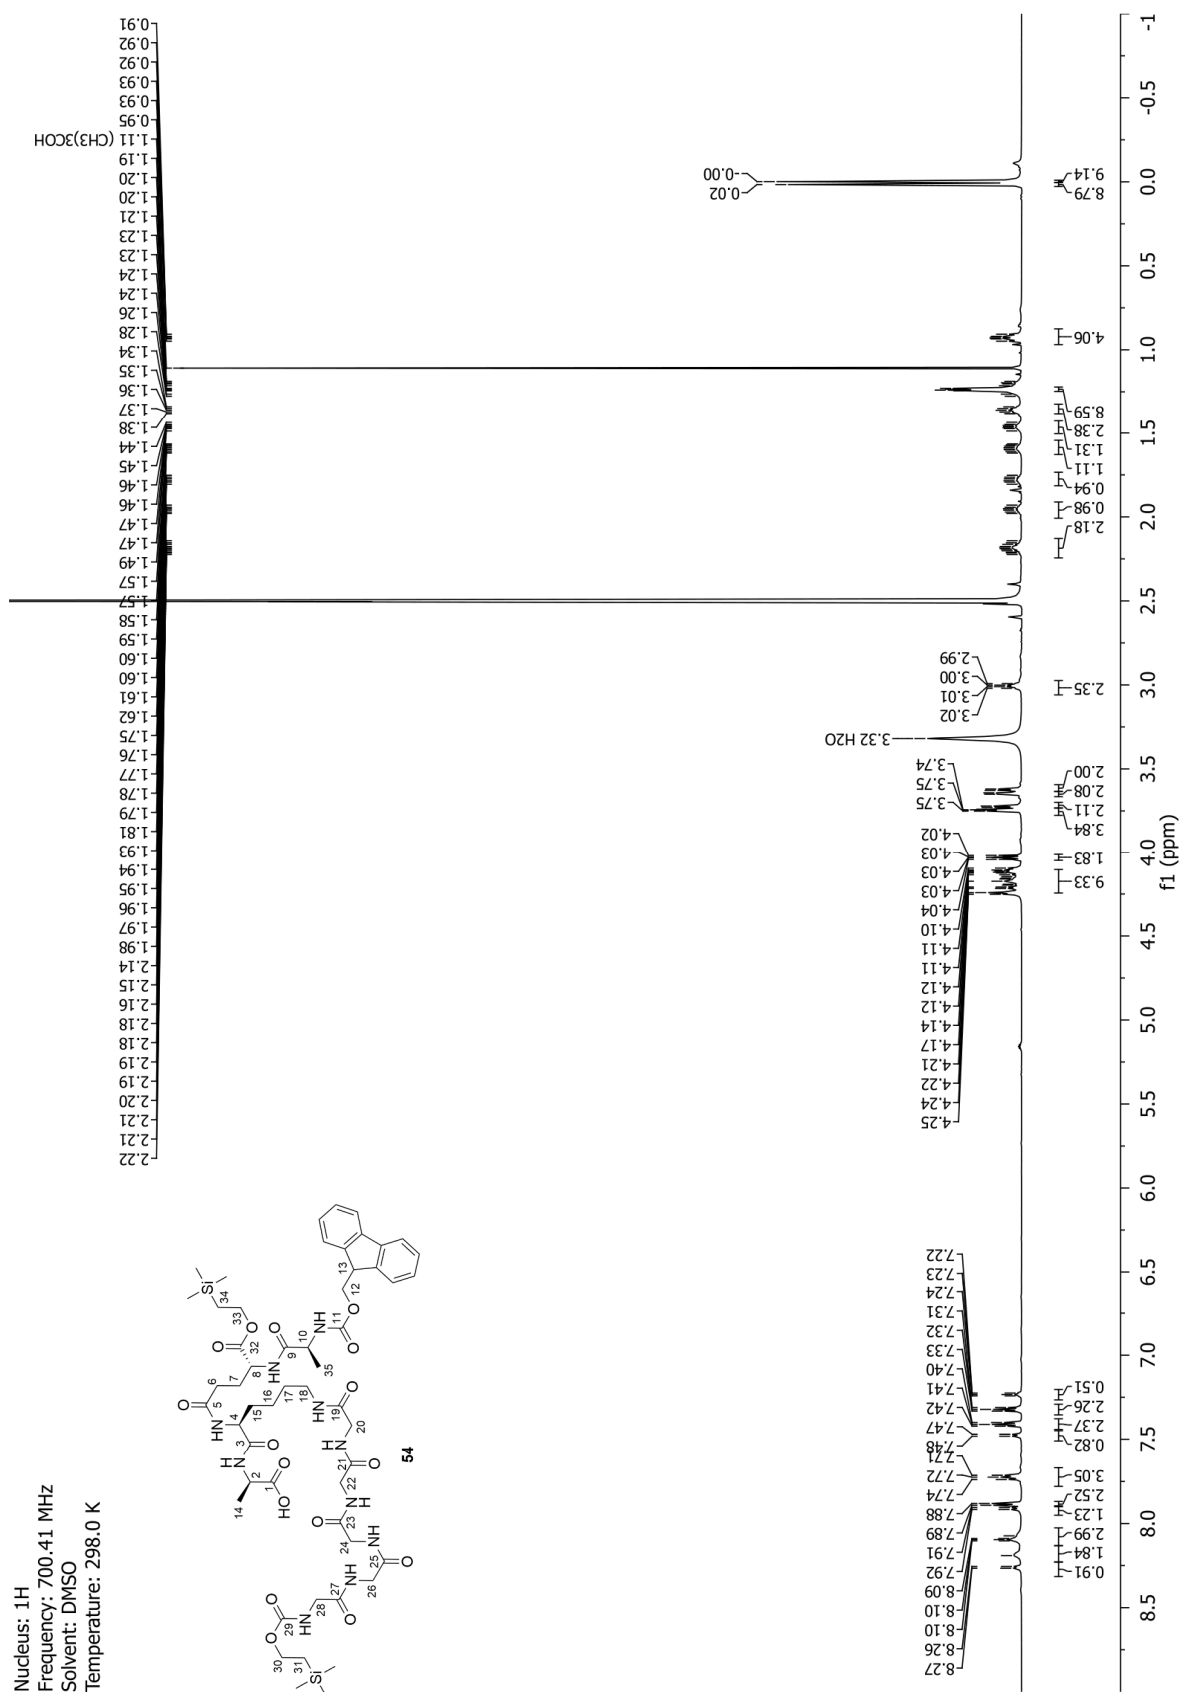

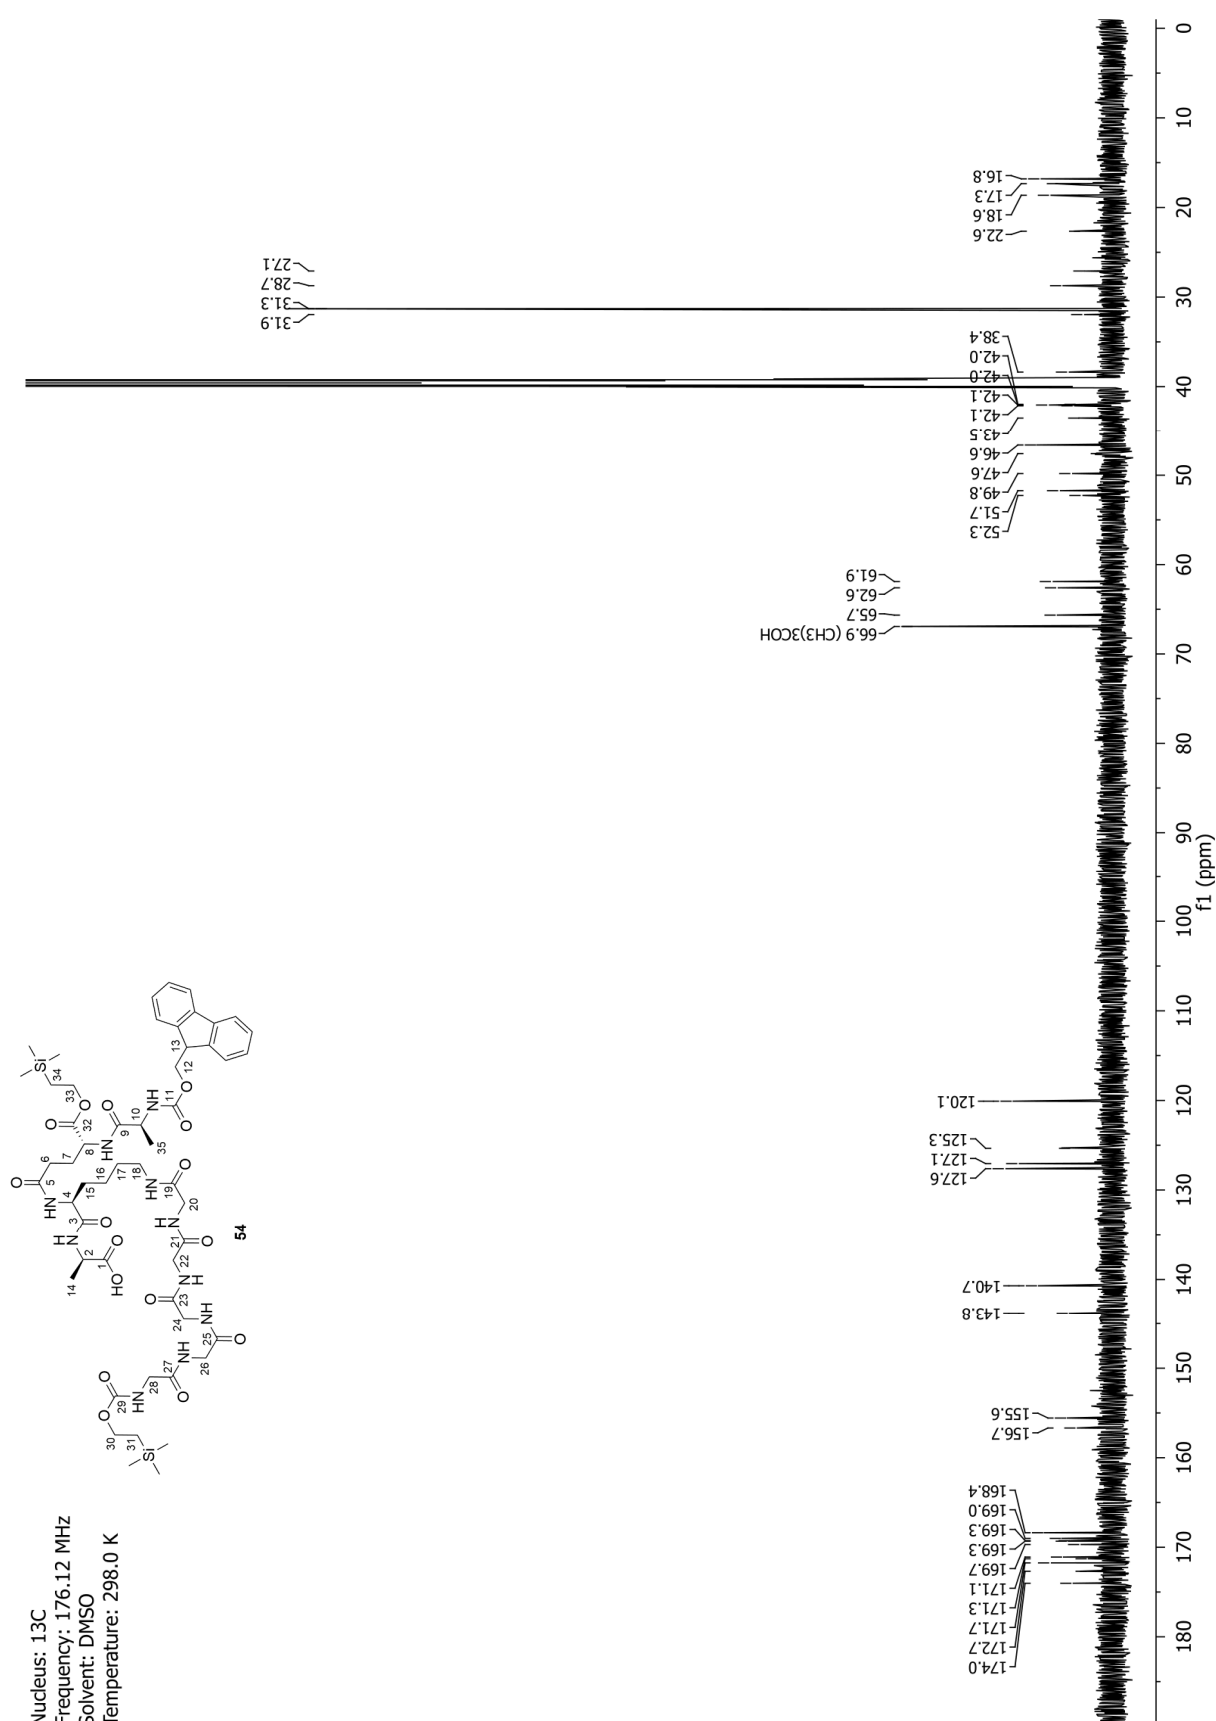



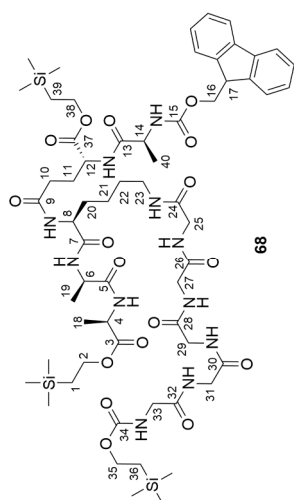

Nucleus:  $^1\text{H}$   
 Frequency: 700.41 MHz  
 Solvent: DMSO  
 Temperature: 298.0 K

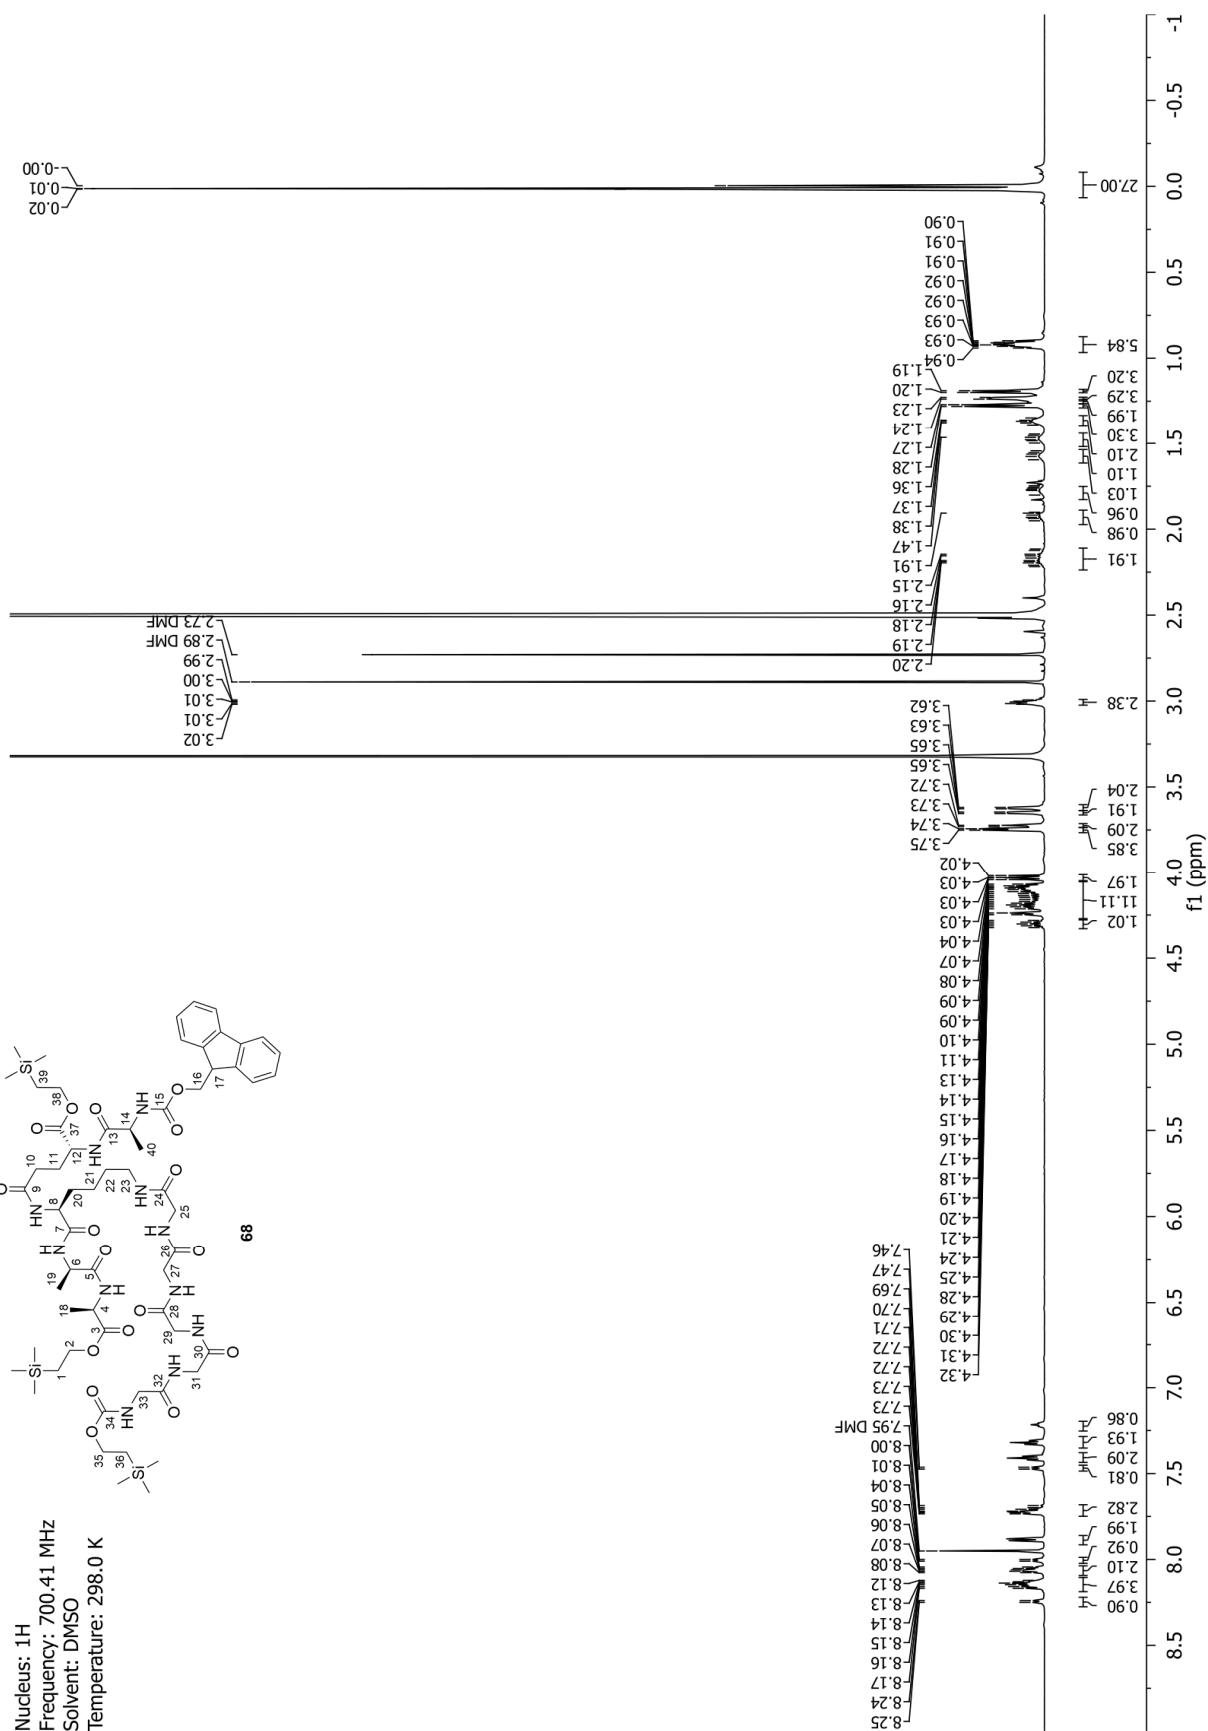

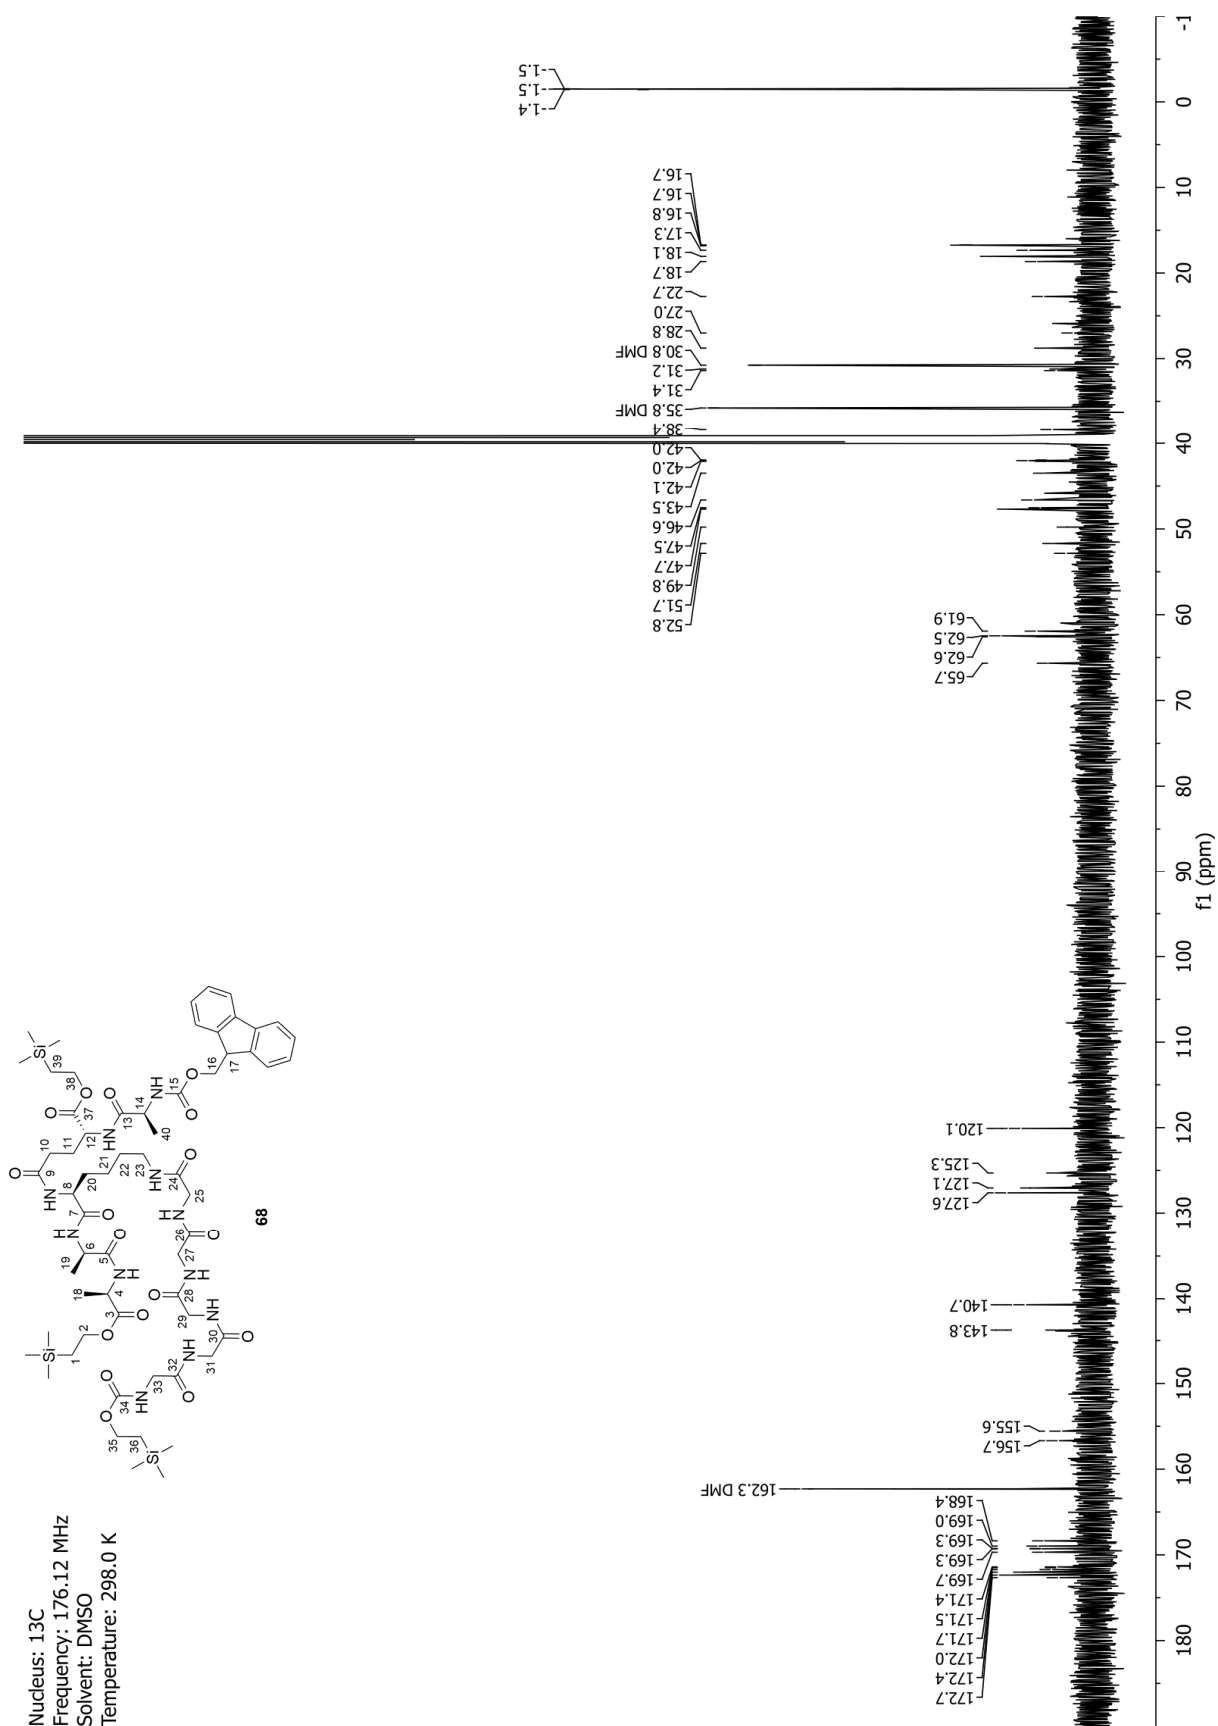

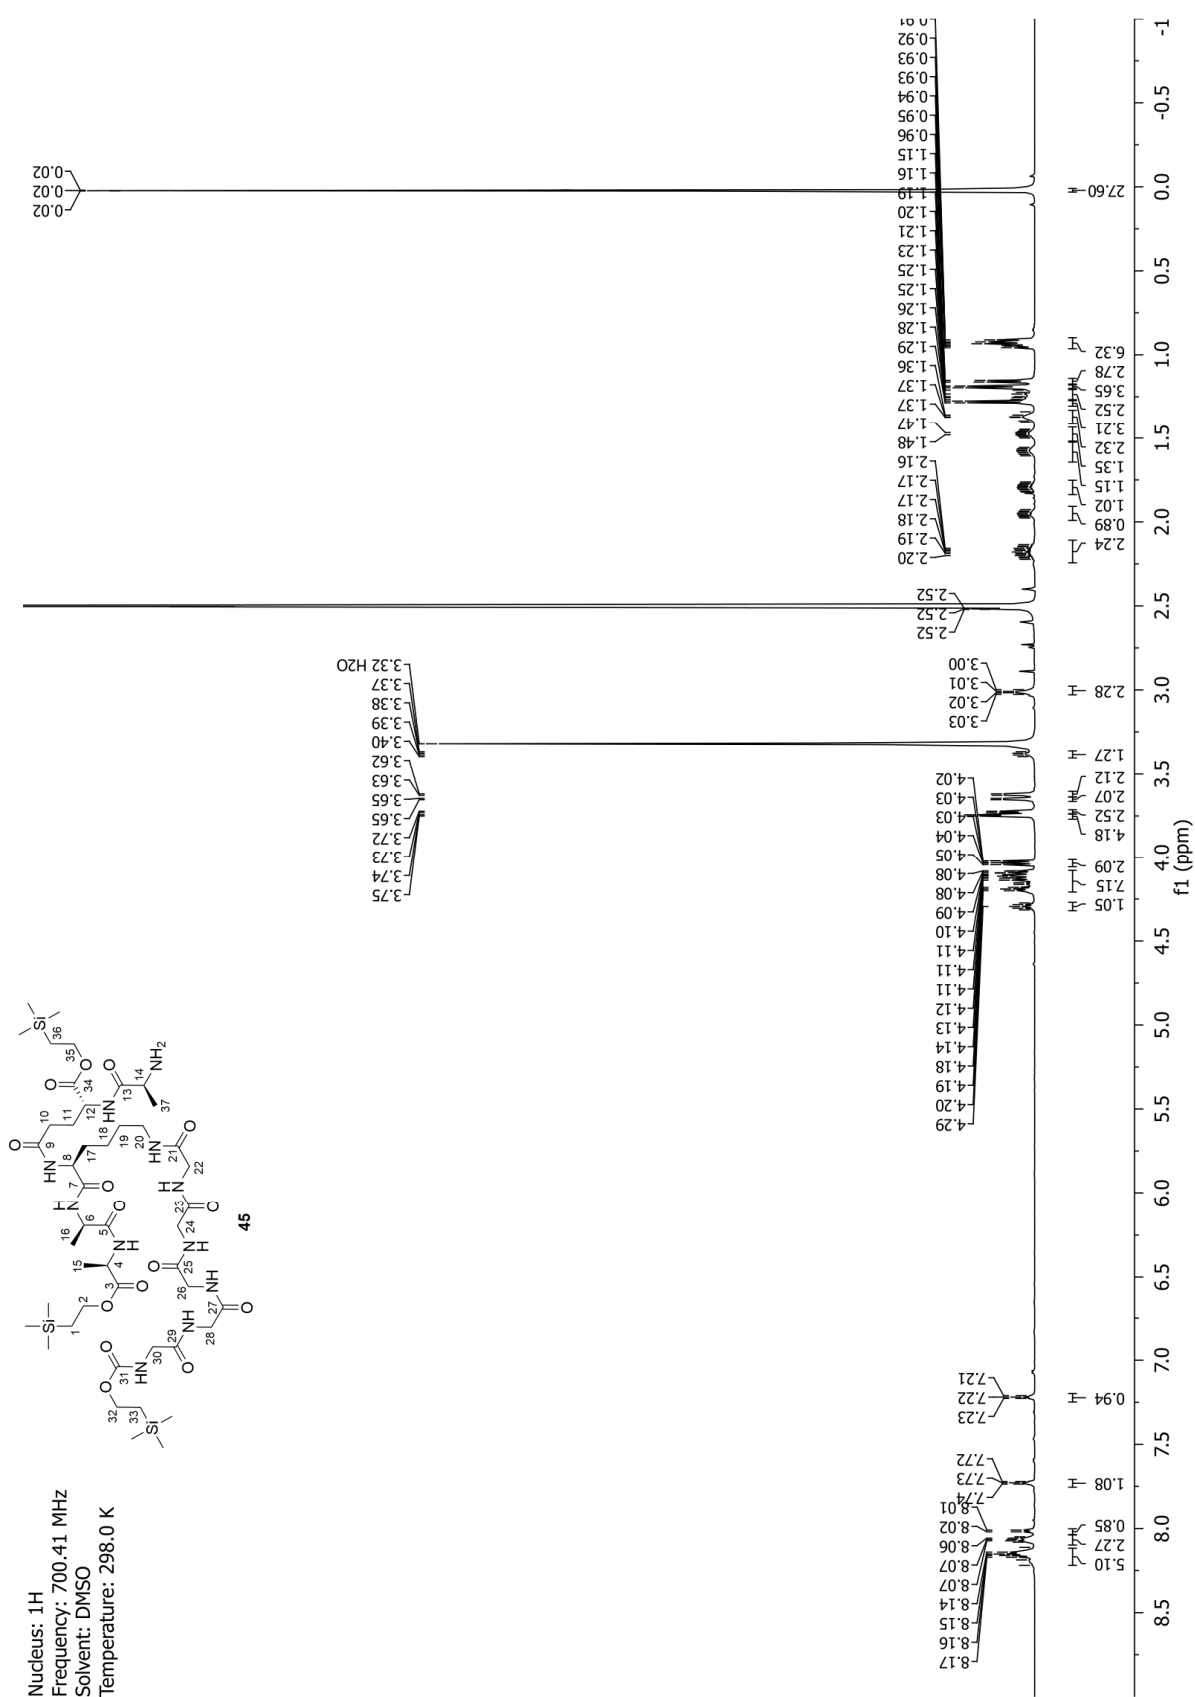

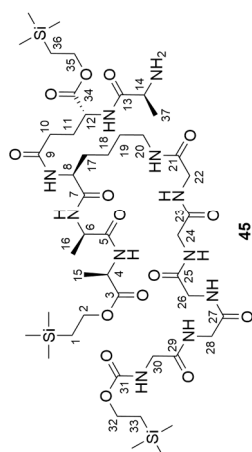

Nucleus:  $^{13}\text{C}$   
 Frequency: 176.12 MHz  
 Solvent: DMSO  
 Temperature: 298.0 K

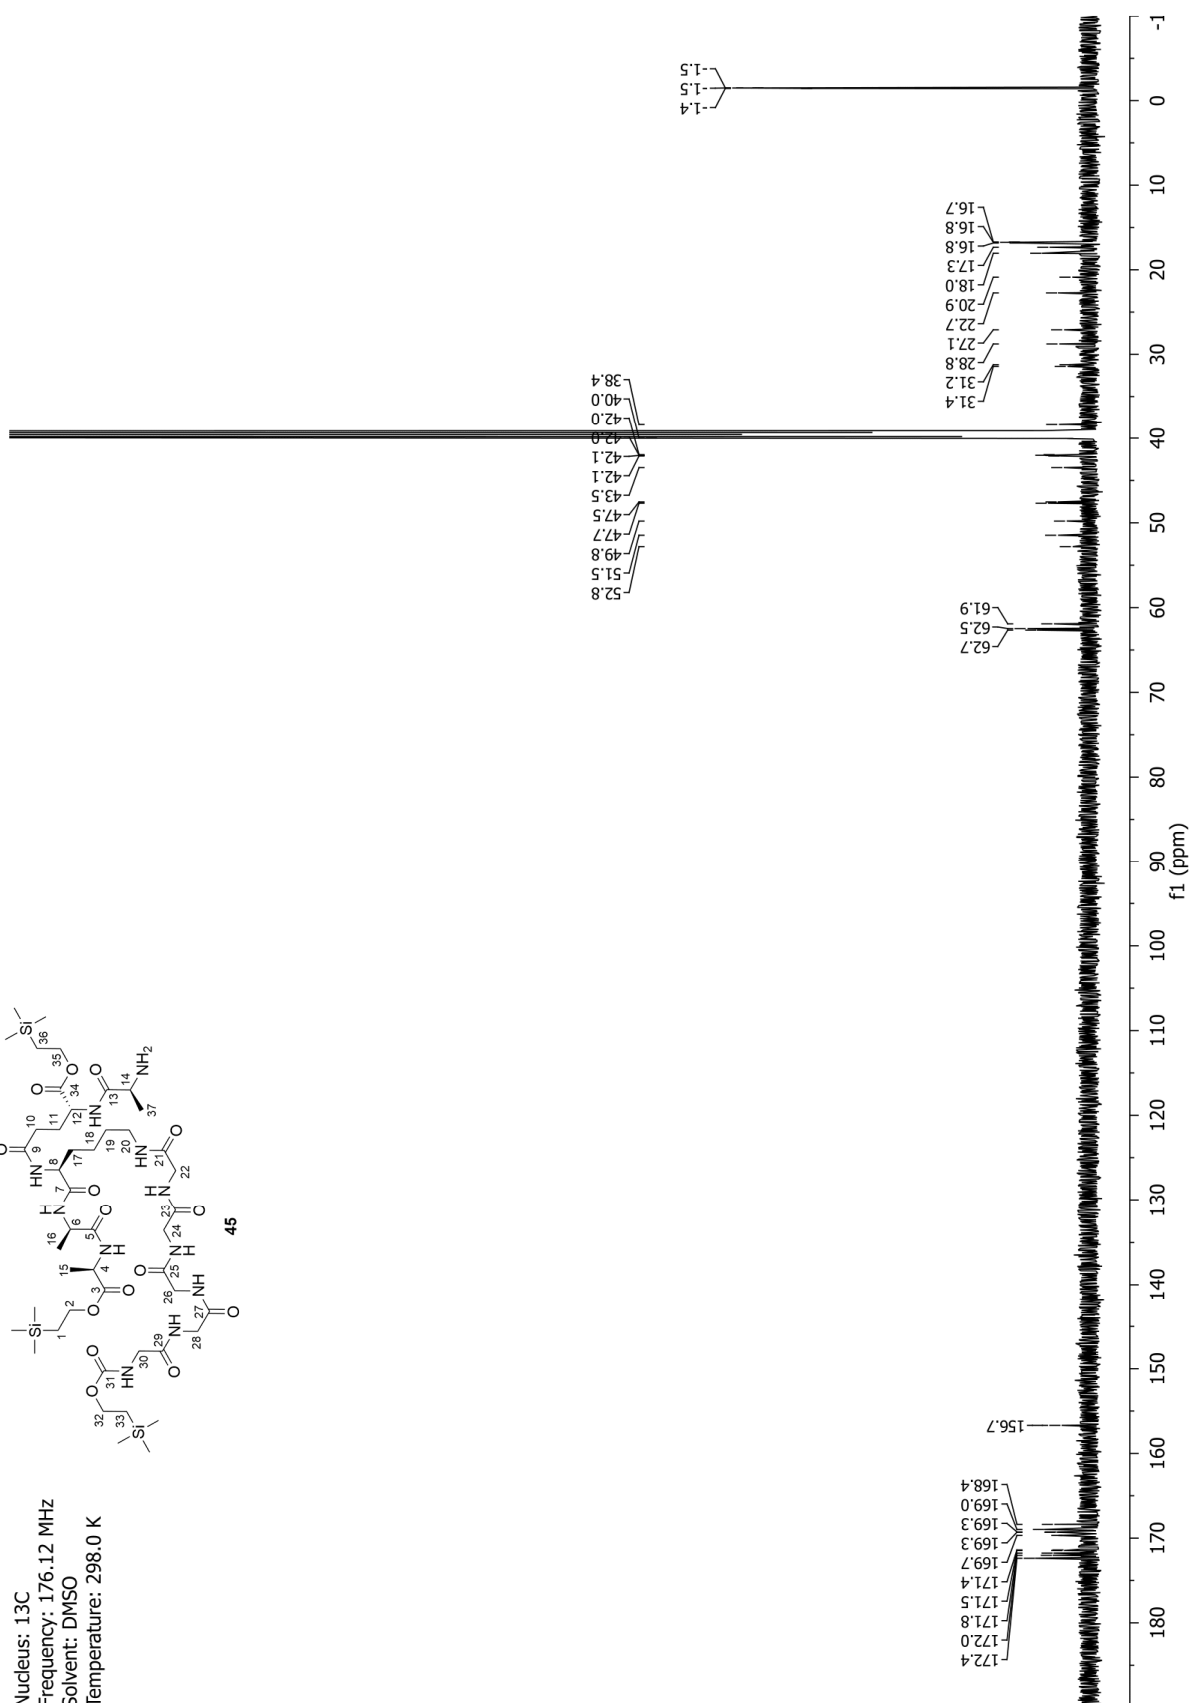

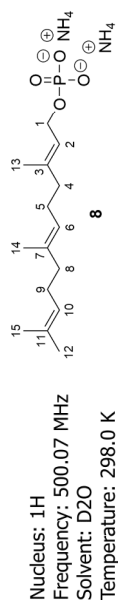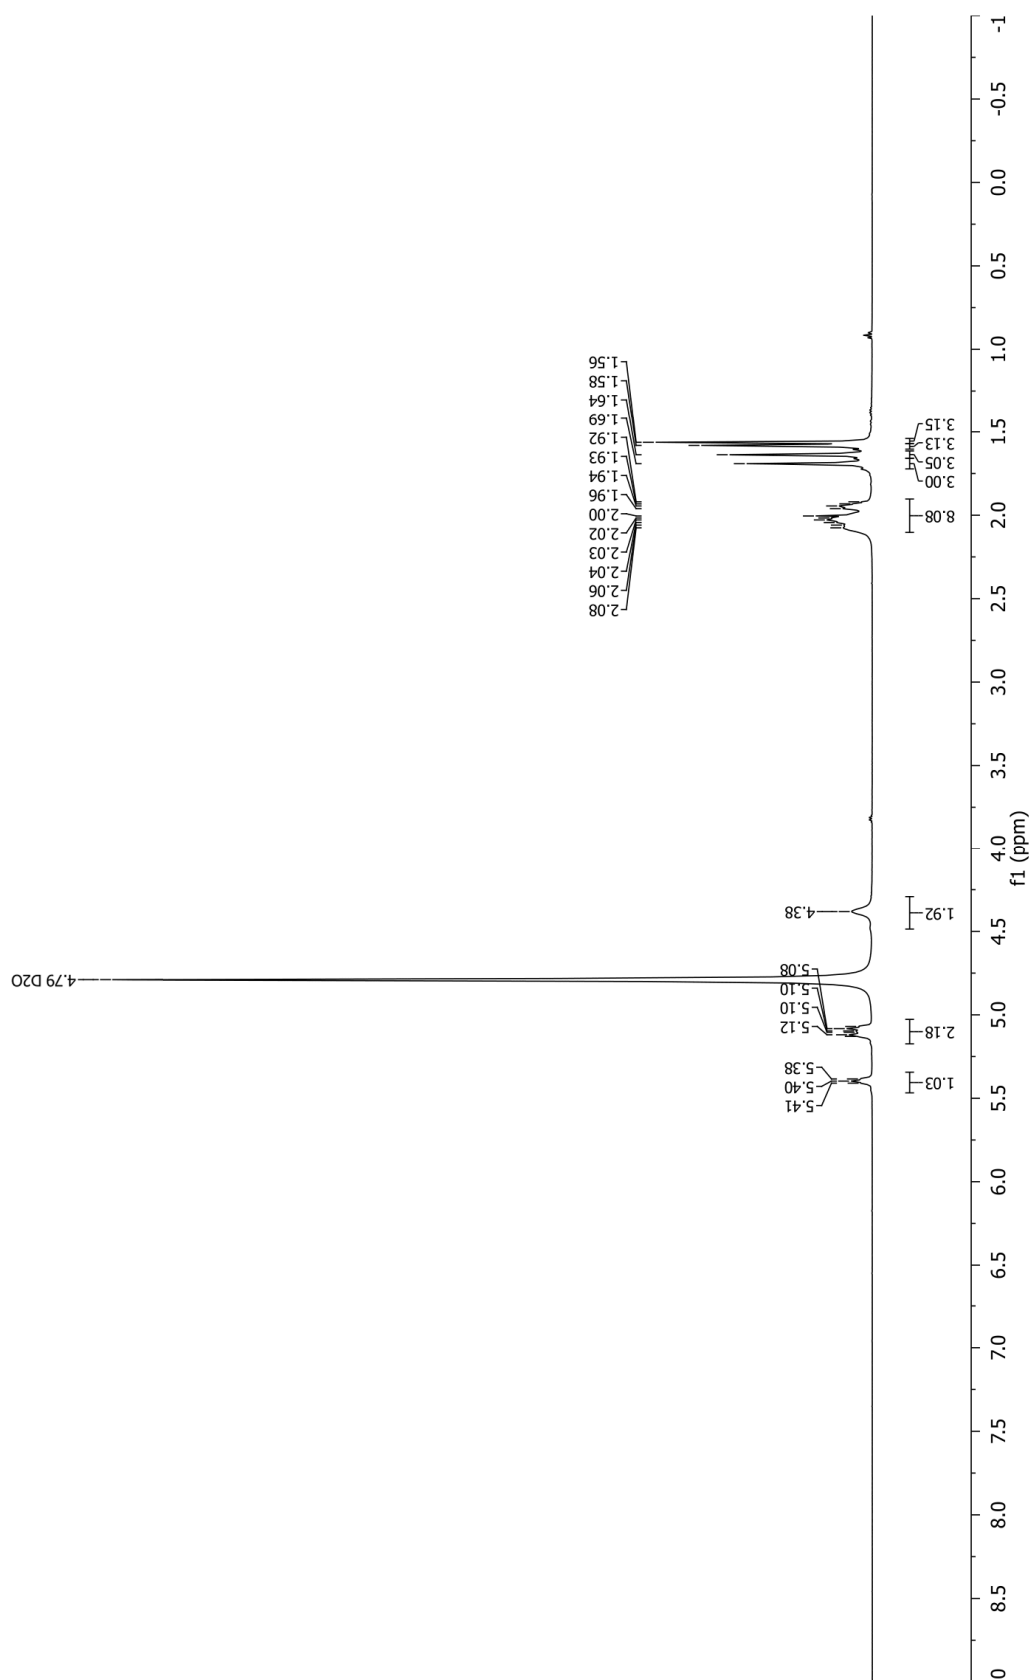

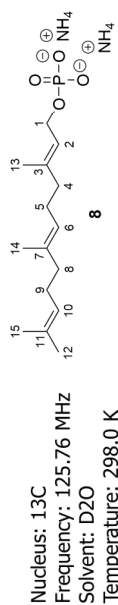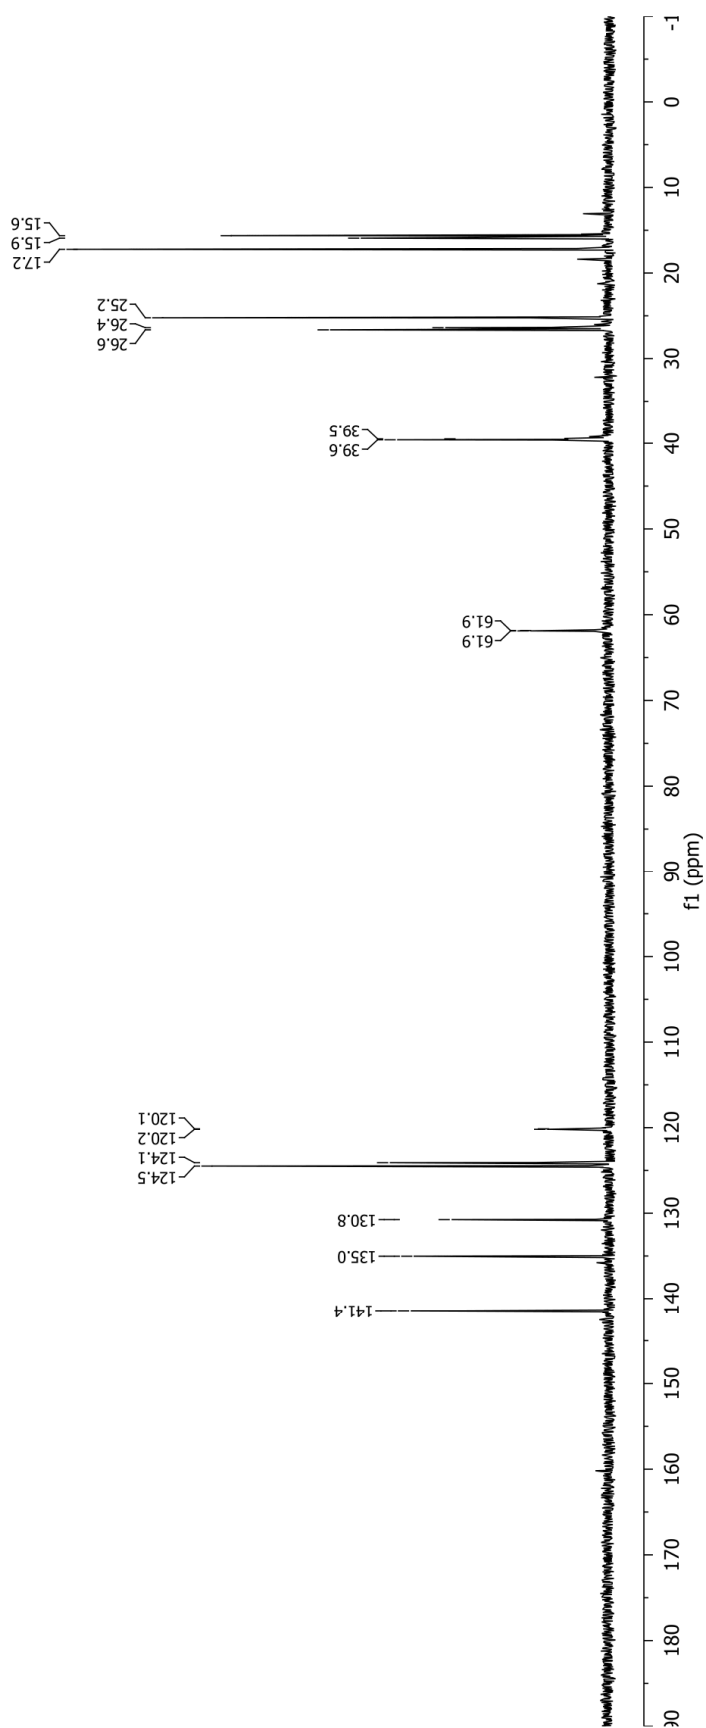

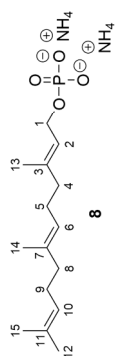

Nucleus:  $^{31}\text{P}$   
 Frequency: 202.46 MHz  
 Solvent: D<sub>2</sub>O  
 Temperature: 298.0 K

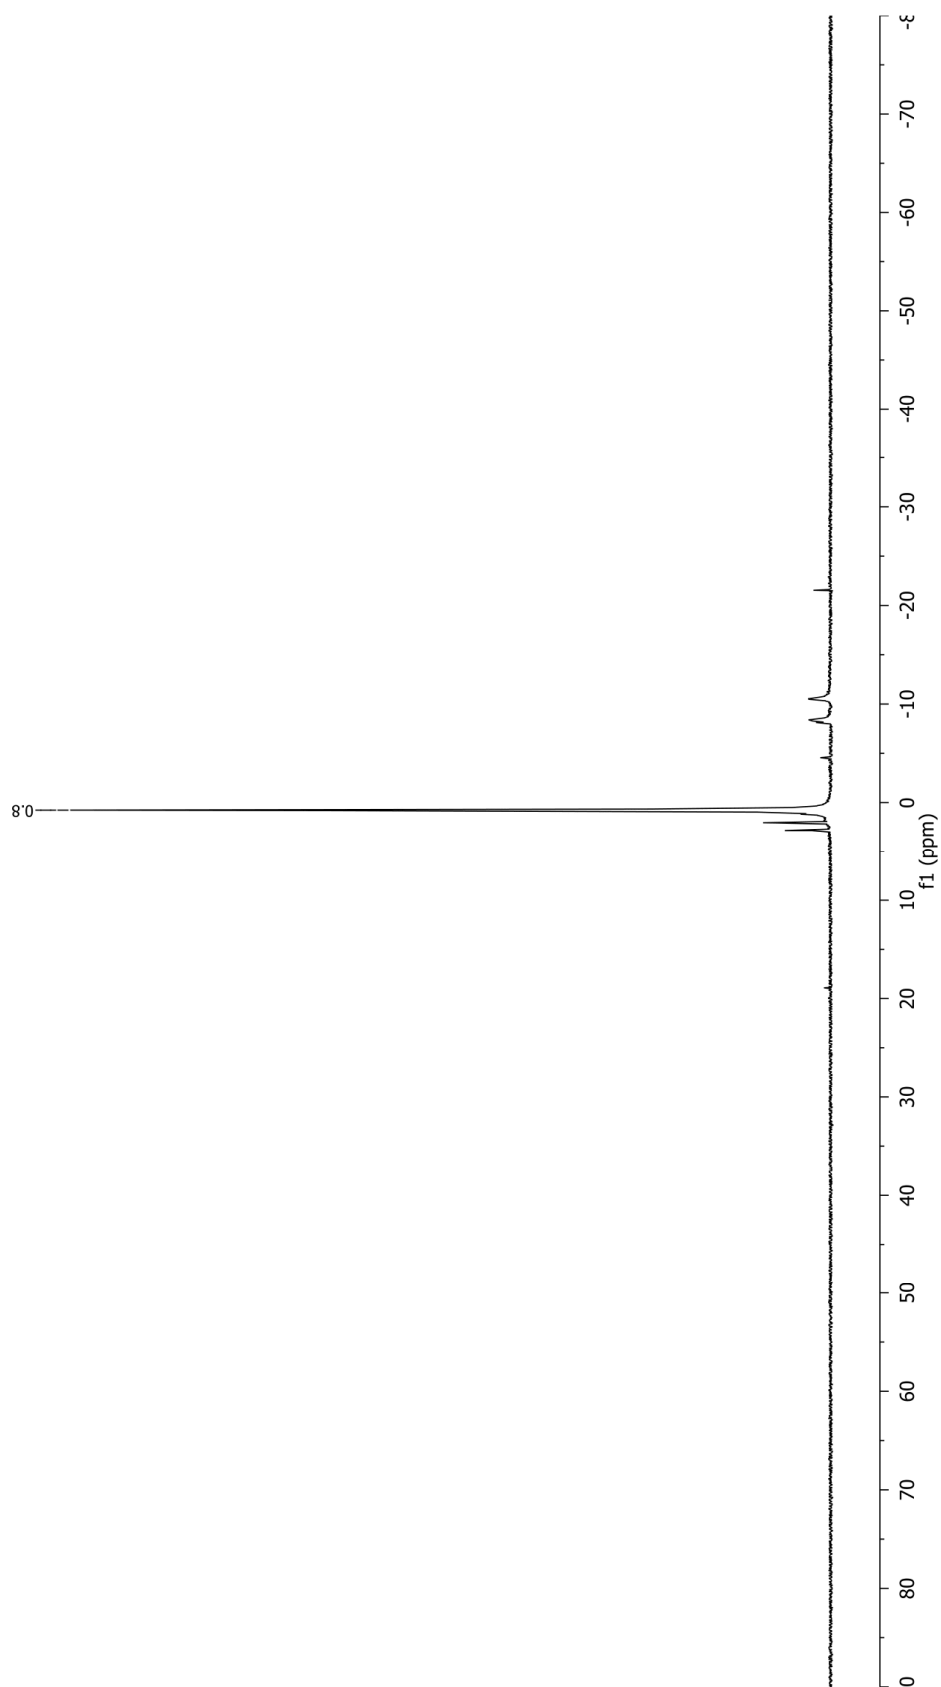

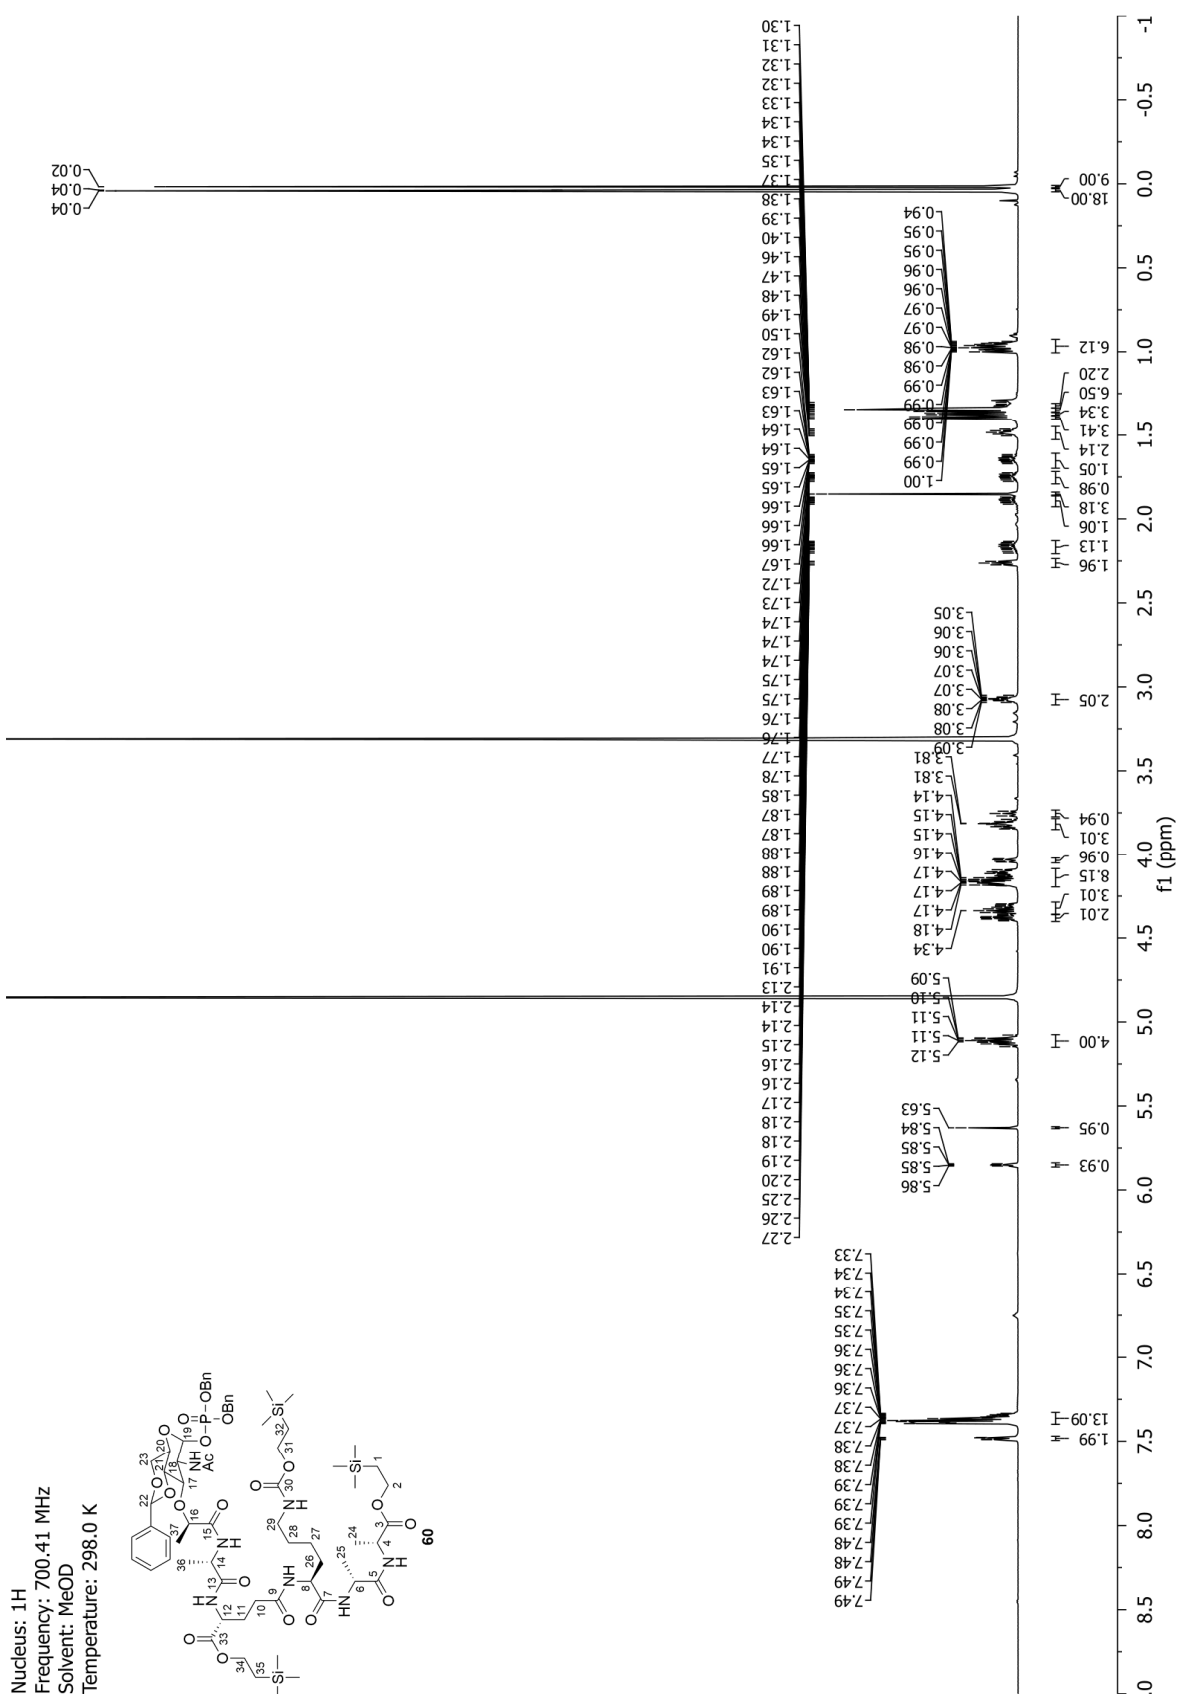



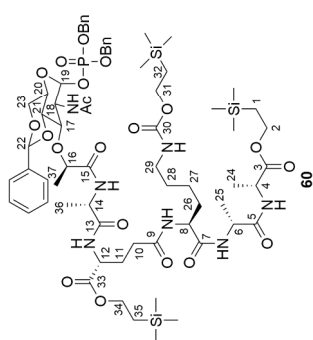

Nucleus:  $^{13}\text{C}$   
 Frequency: 176.12 MHz  
 Solvent: MeOD  
 Temperature: 298.0 K

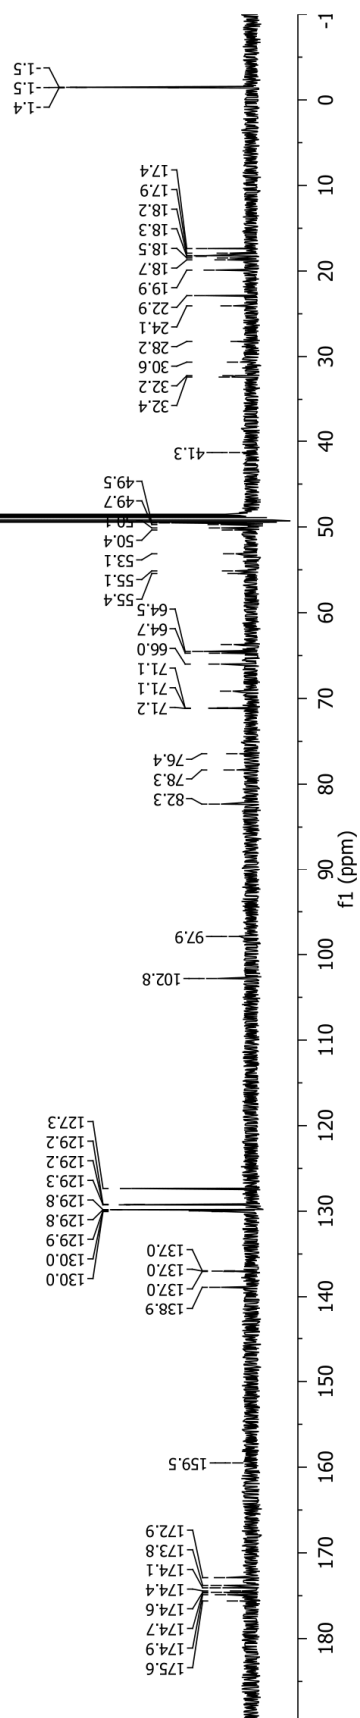

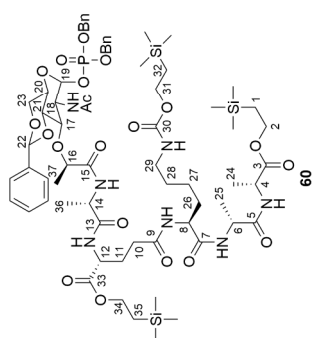

Nucleus:  $^{31}\text{P}$   
 Frequency: 202.46 MHz  
 Solvent: MeOD  
 Temperature: 298.0 K

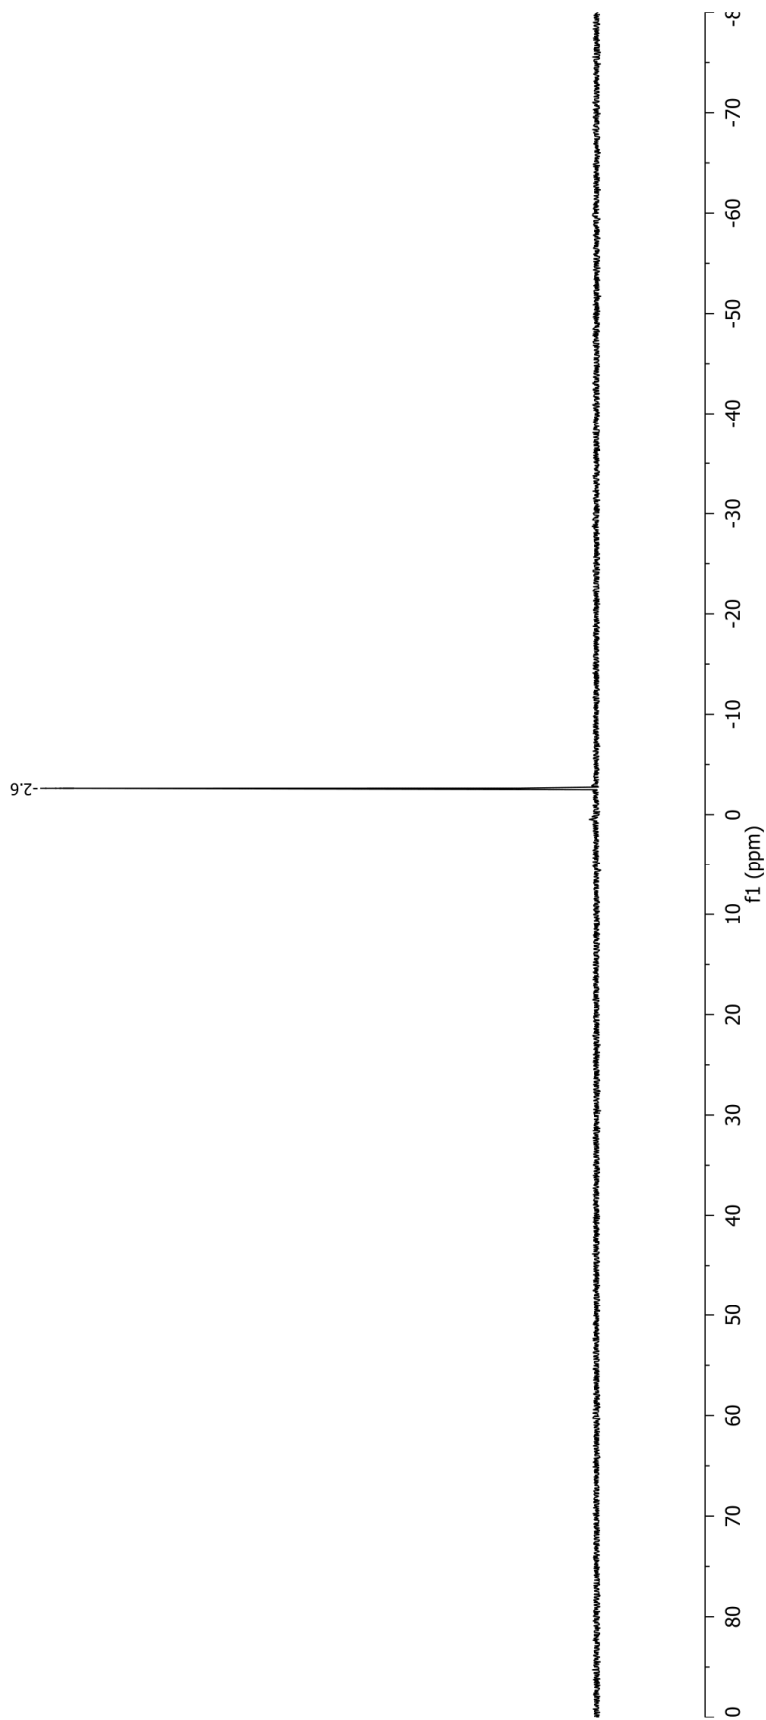

Nucleus:  $^1\text{H}$   
 Frequency: 700.41 MHz  
 Solvent: D<sub>2</sub>O  
 Temperature: 298.0 K

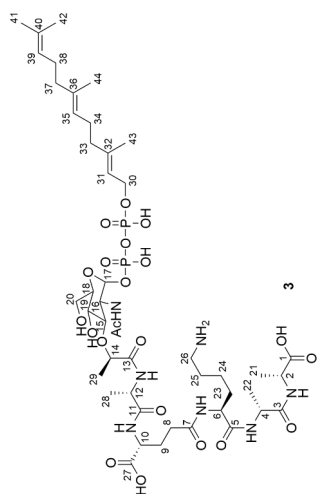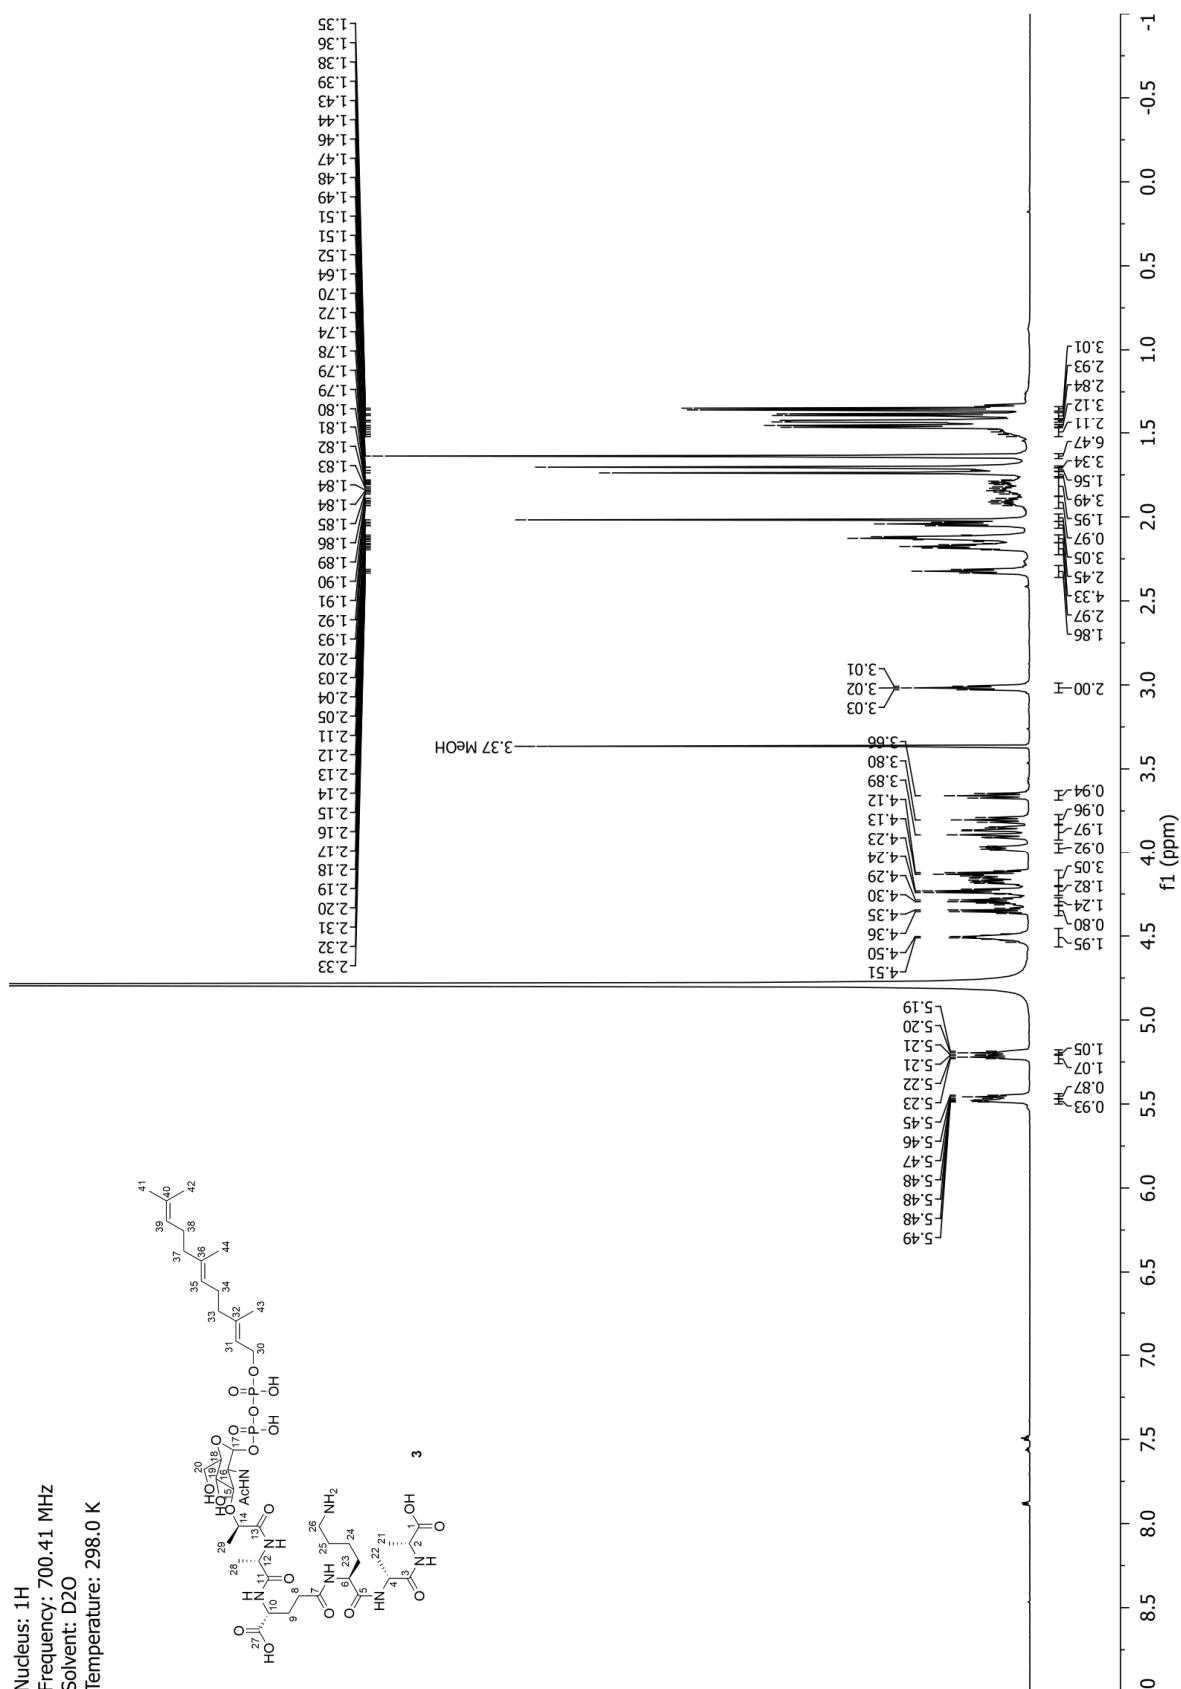

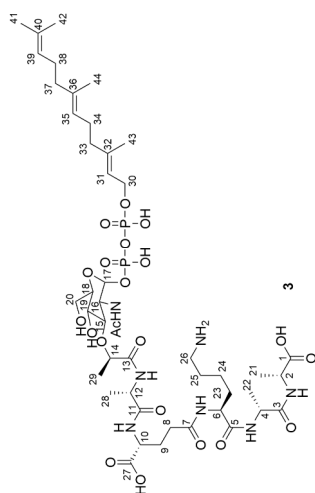

Nucleus:  $^{13}\text{C}$   
 Frequency: 176.12 MHz  
 Solvent: D<sub>2</sub>O  
 Temperature: 298.0 K

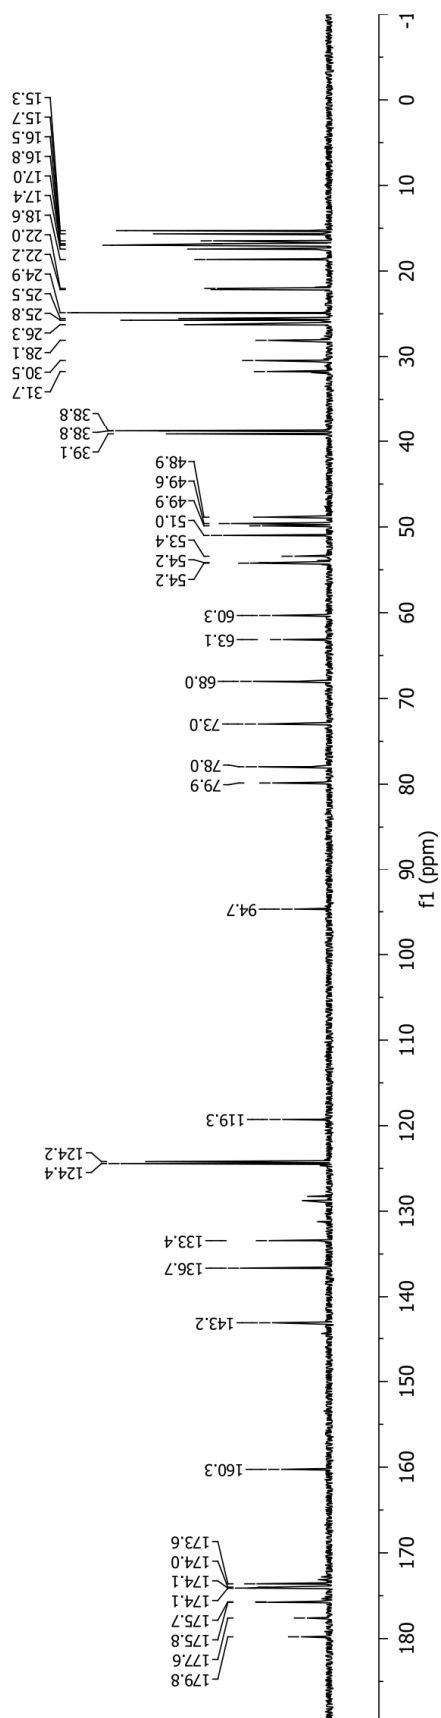

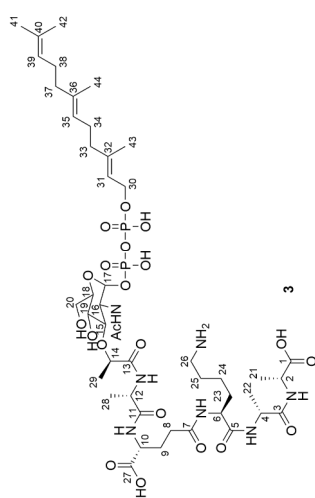

Nucleus:  $^{31}\text{P}$   
 Frequency: 283.53 MHz  
 Solvent: D<sub>2</sub>O  
 Temperature: 298.0 K

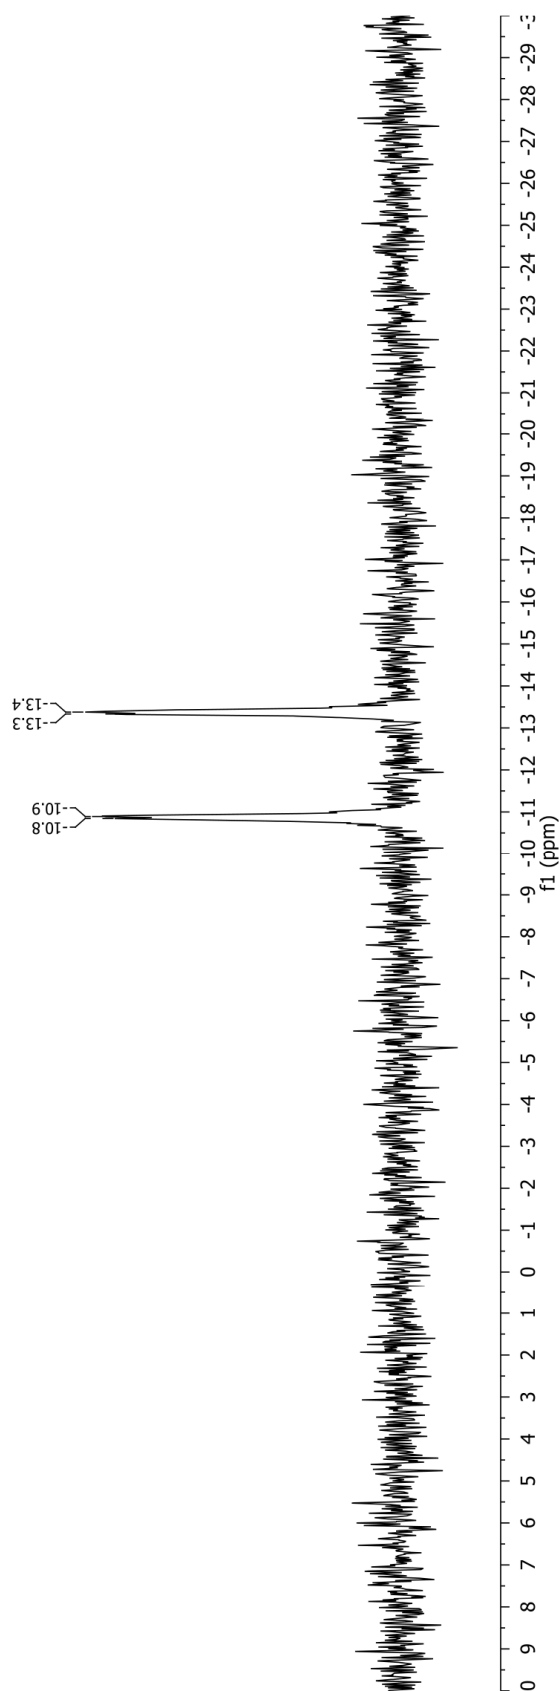

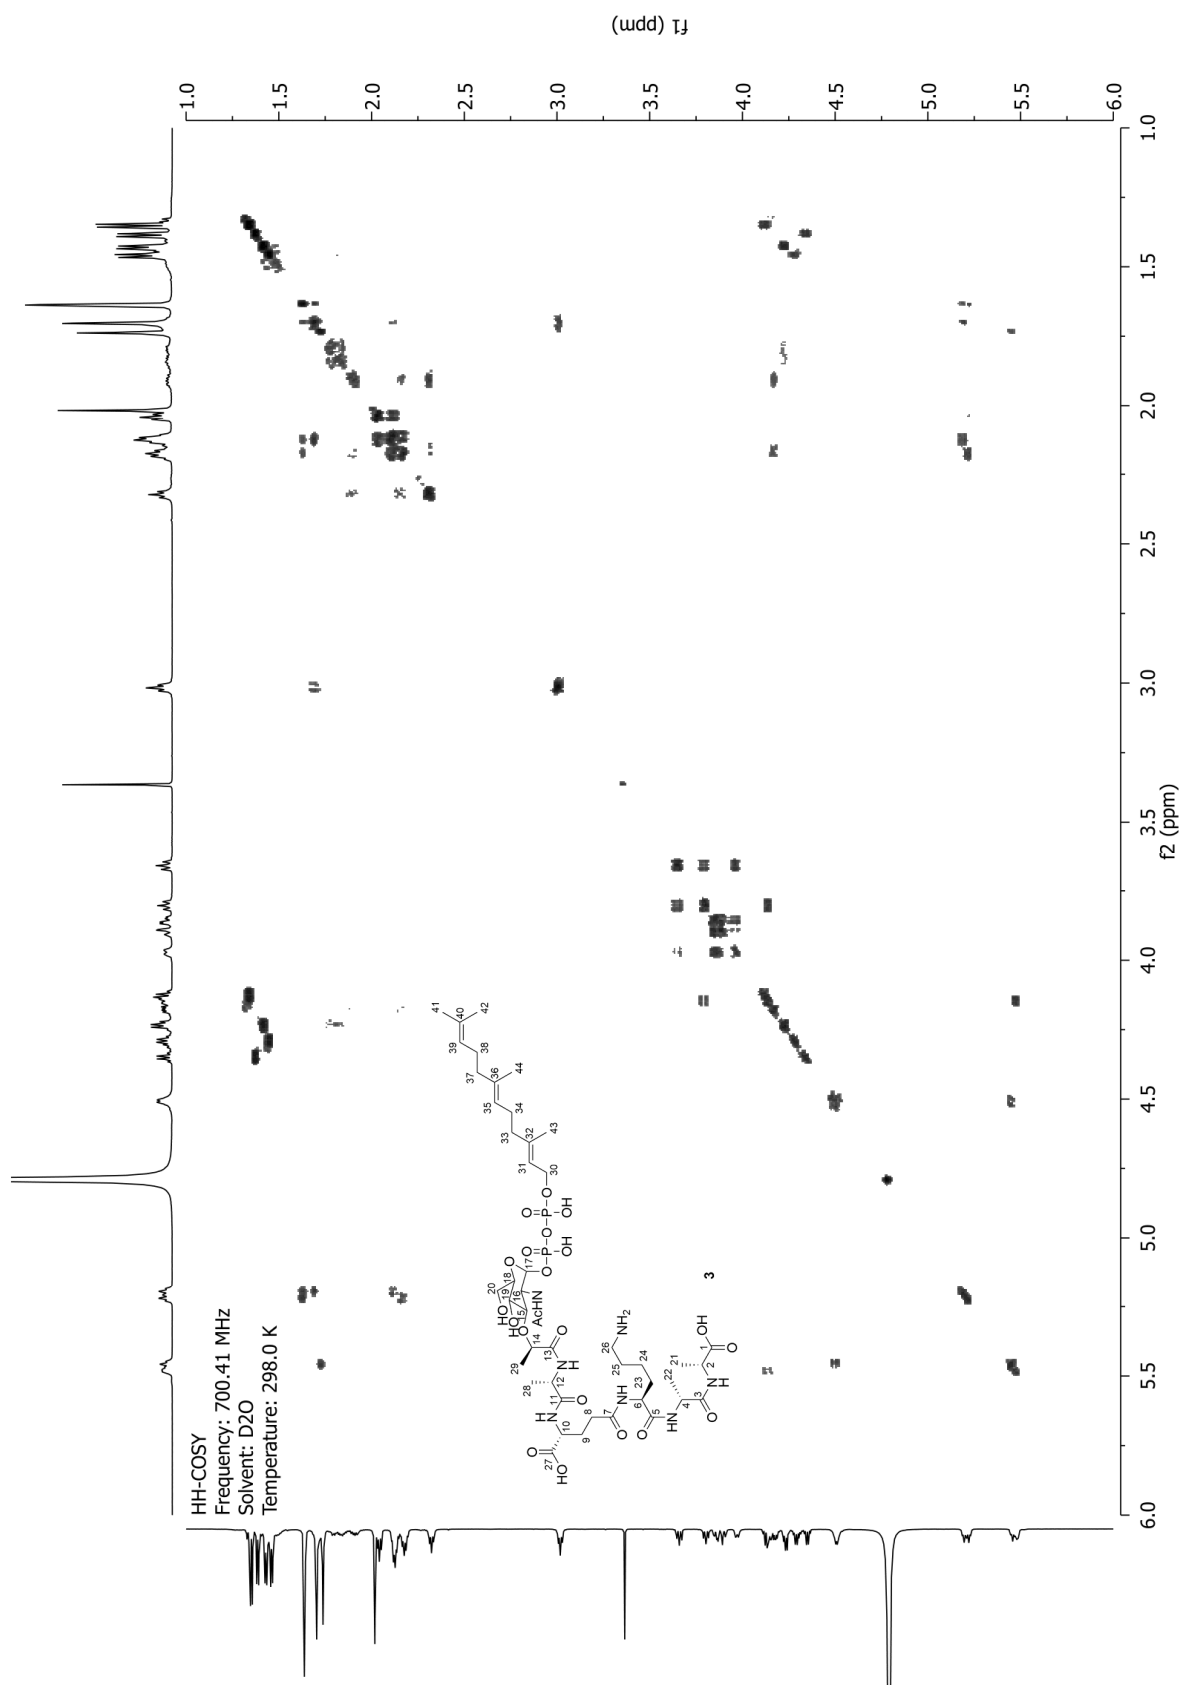

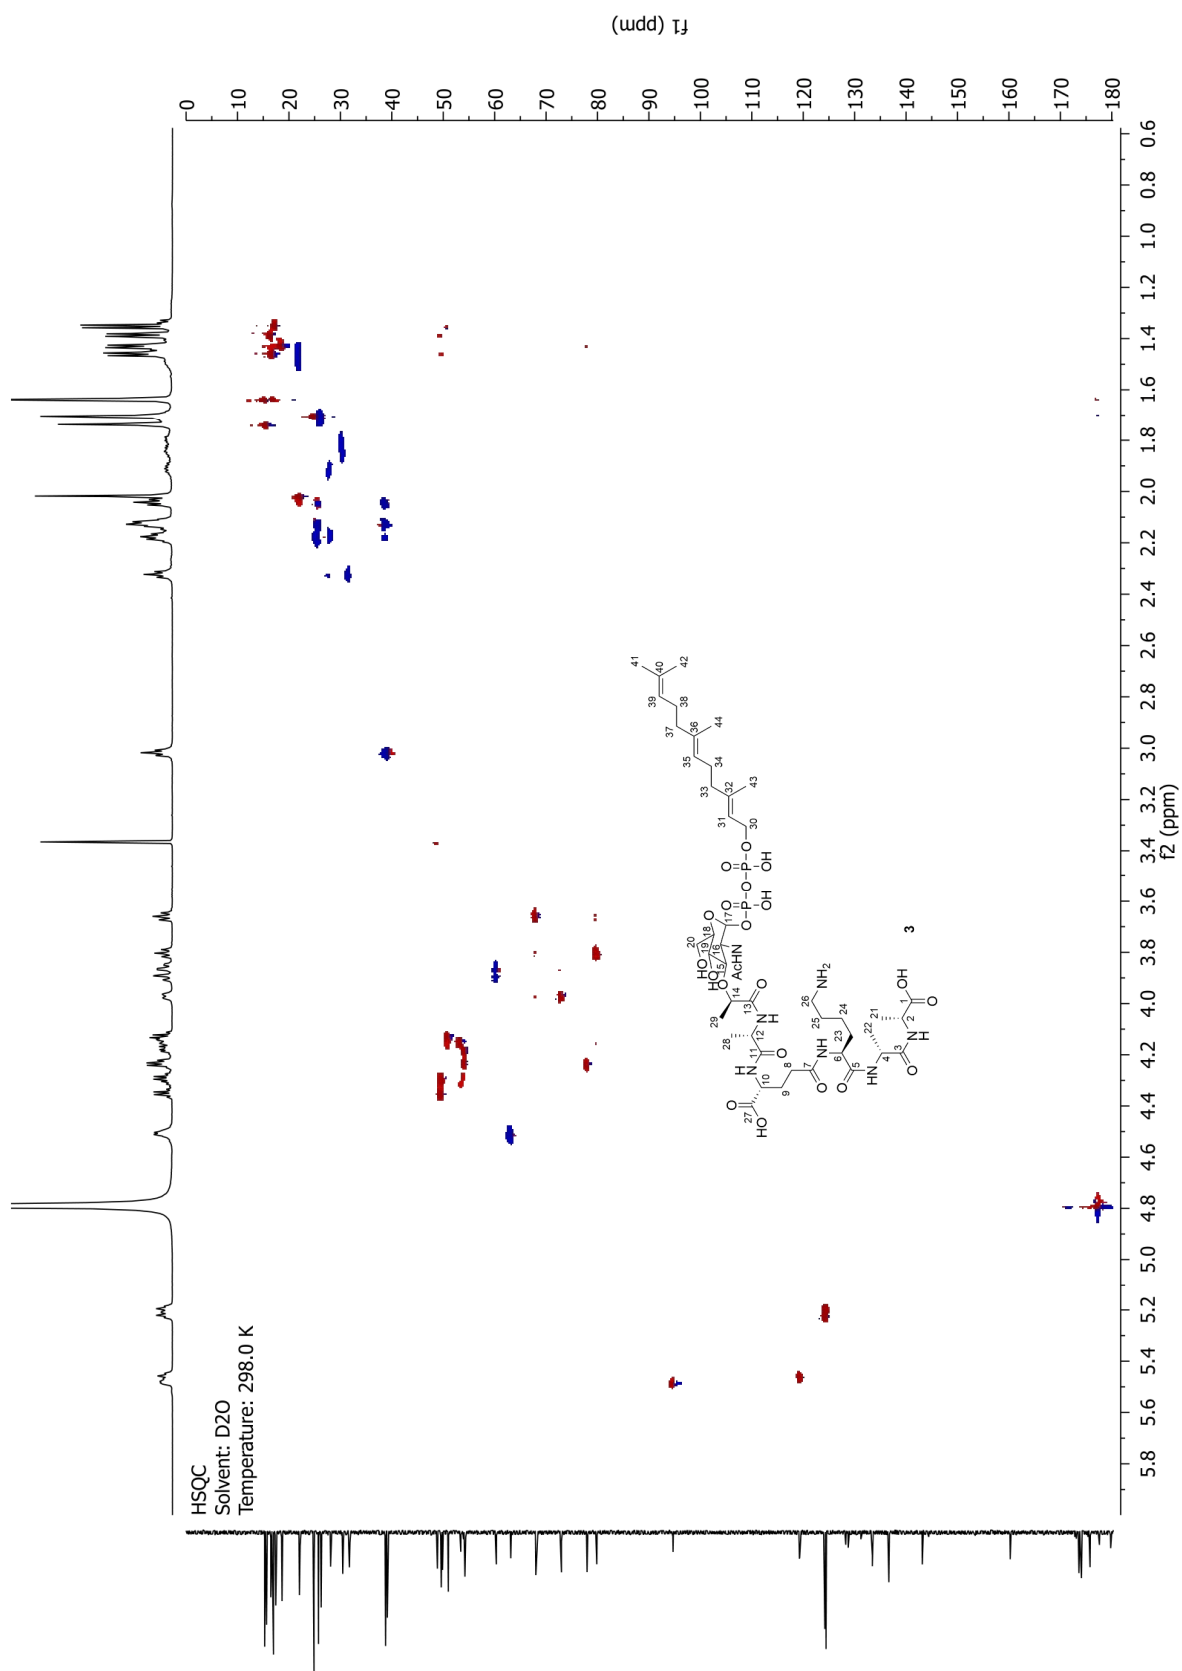

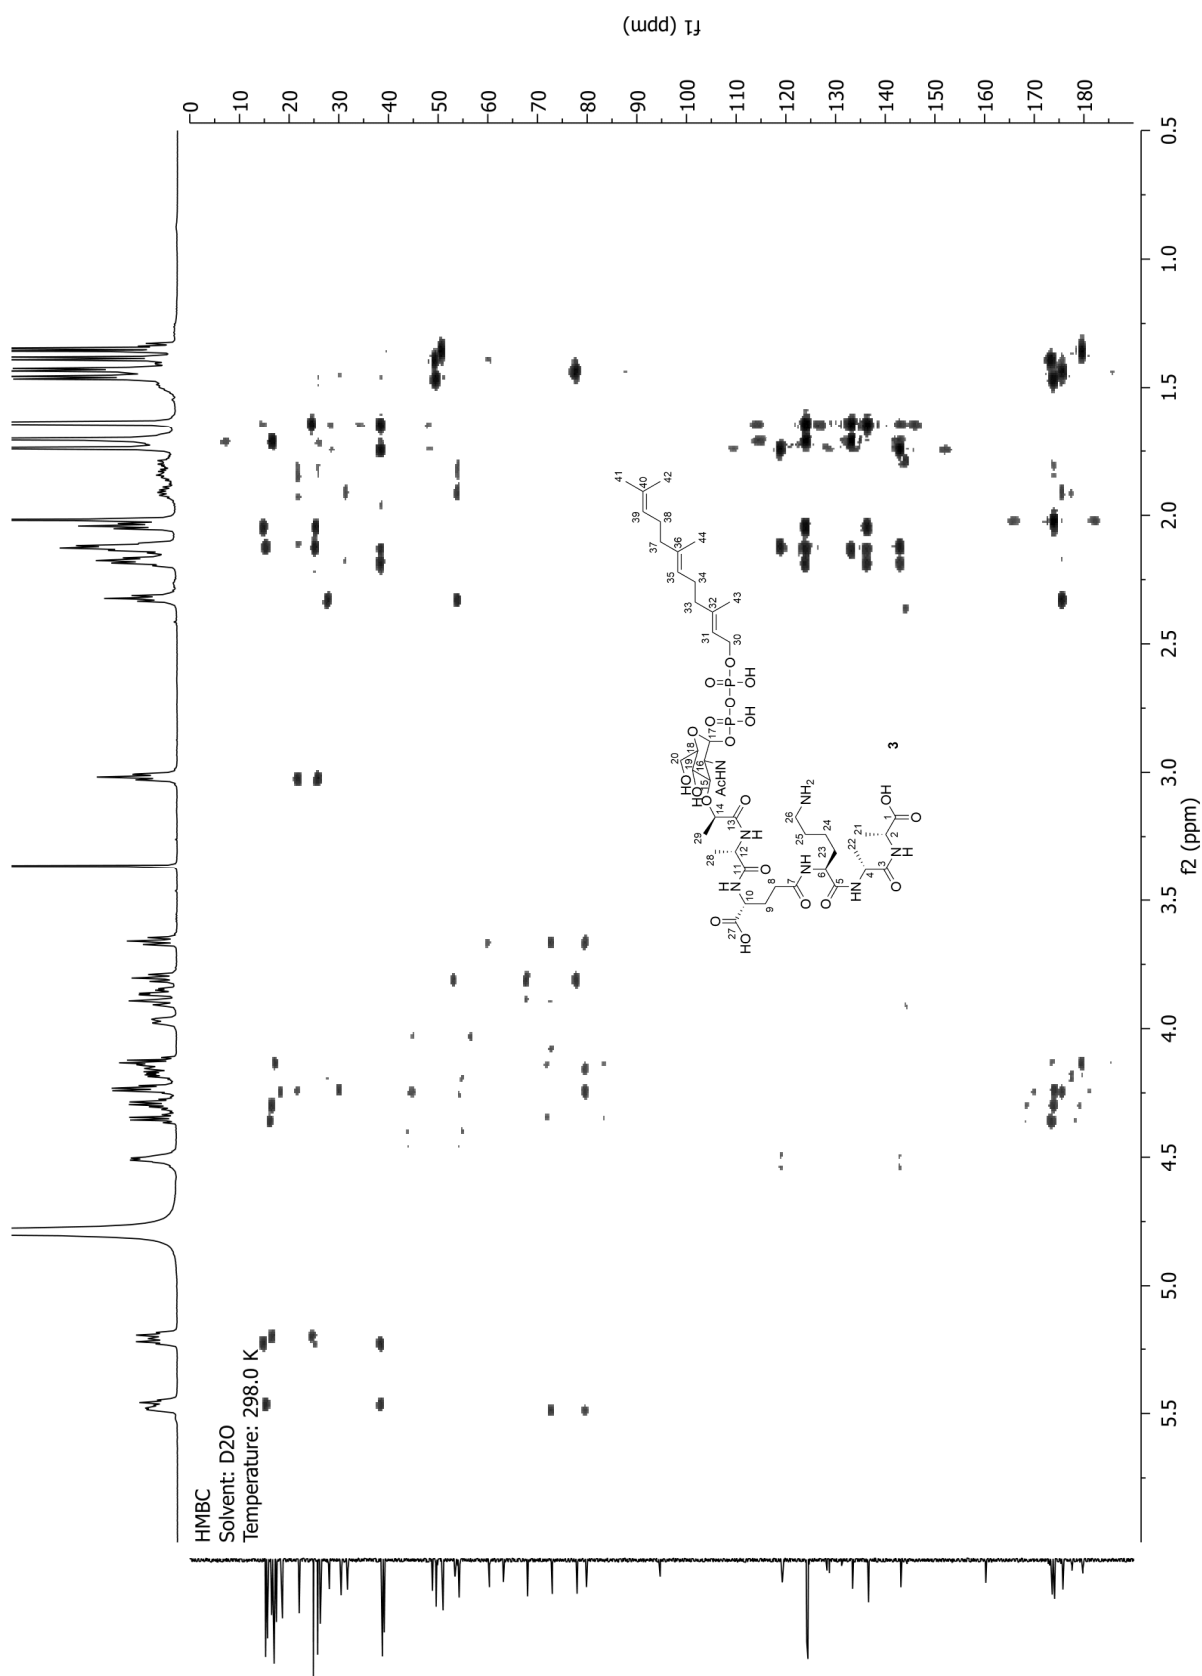



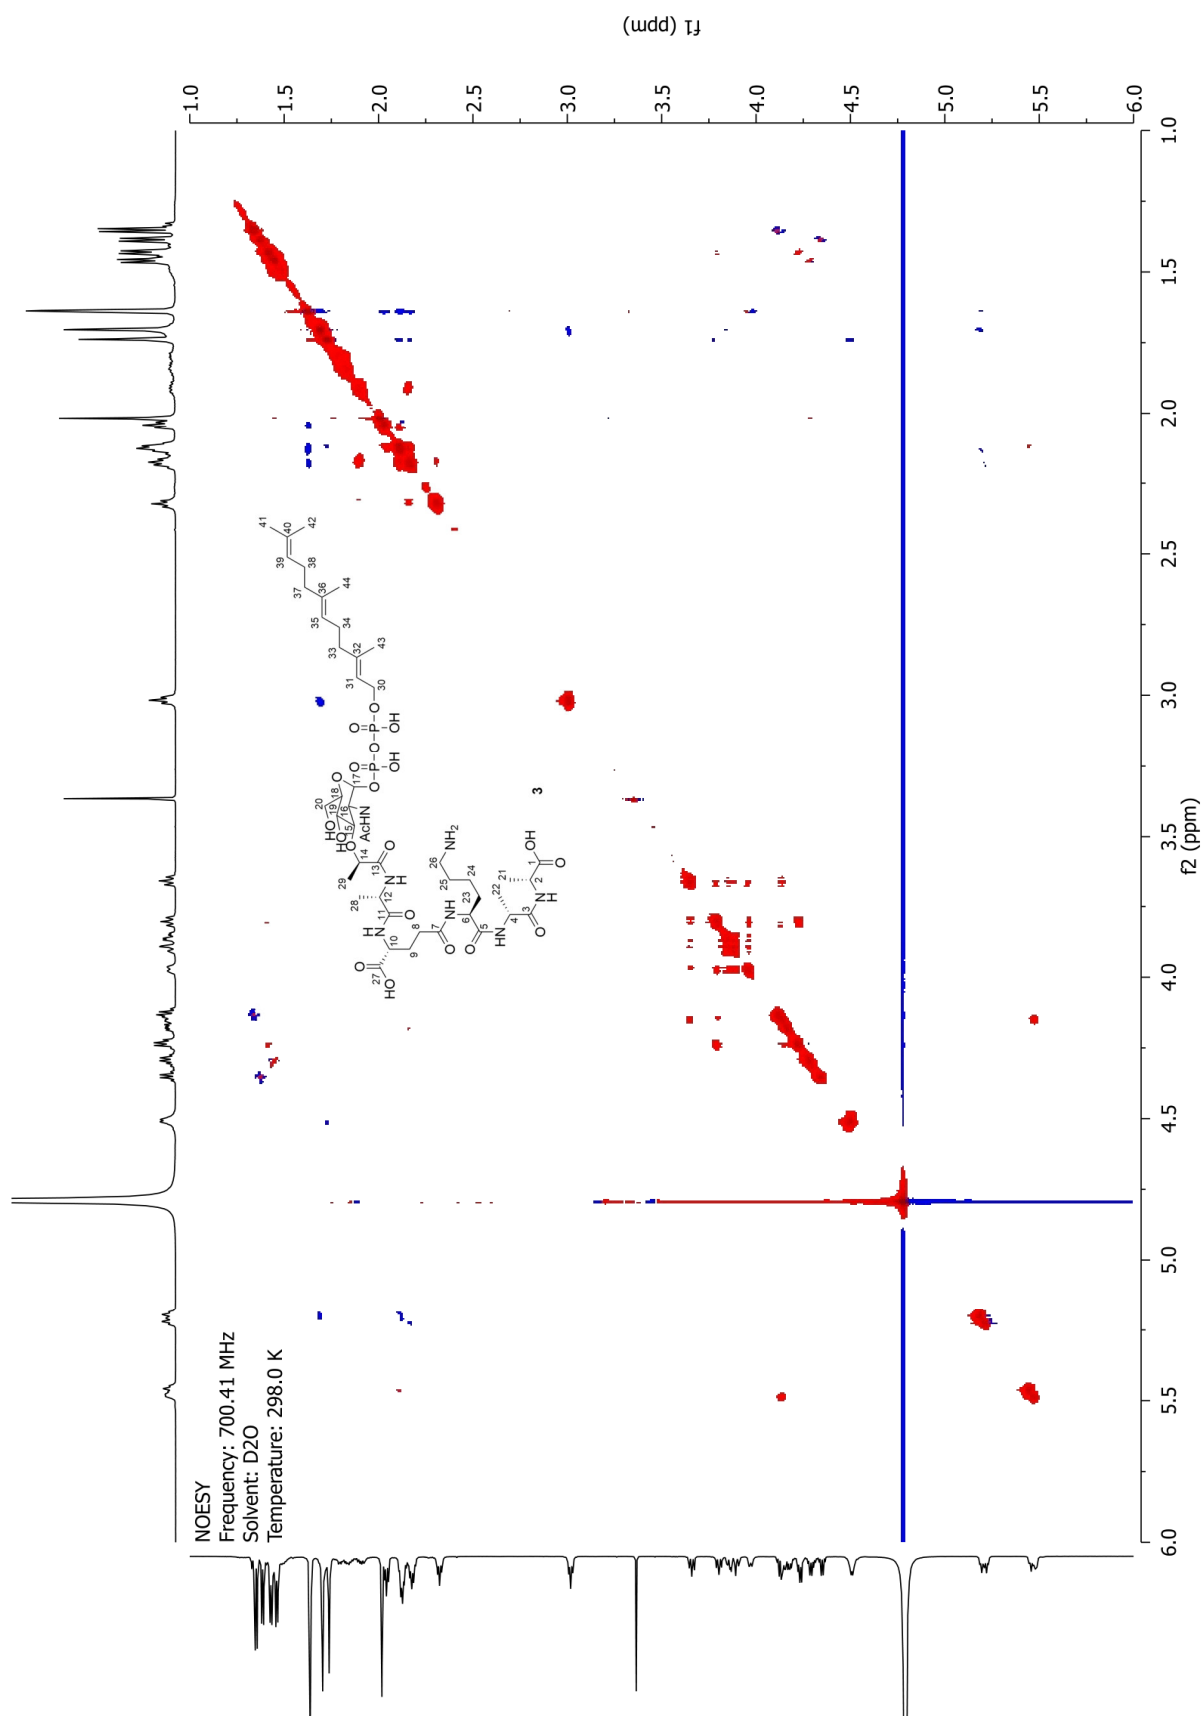

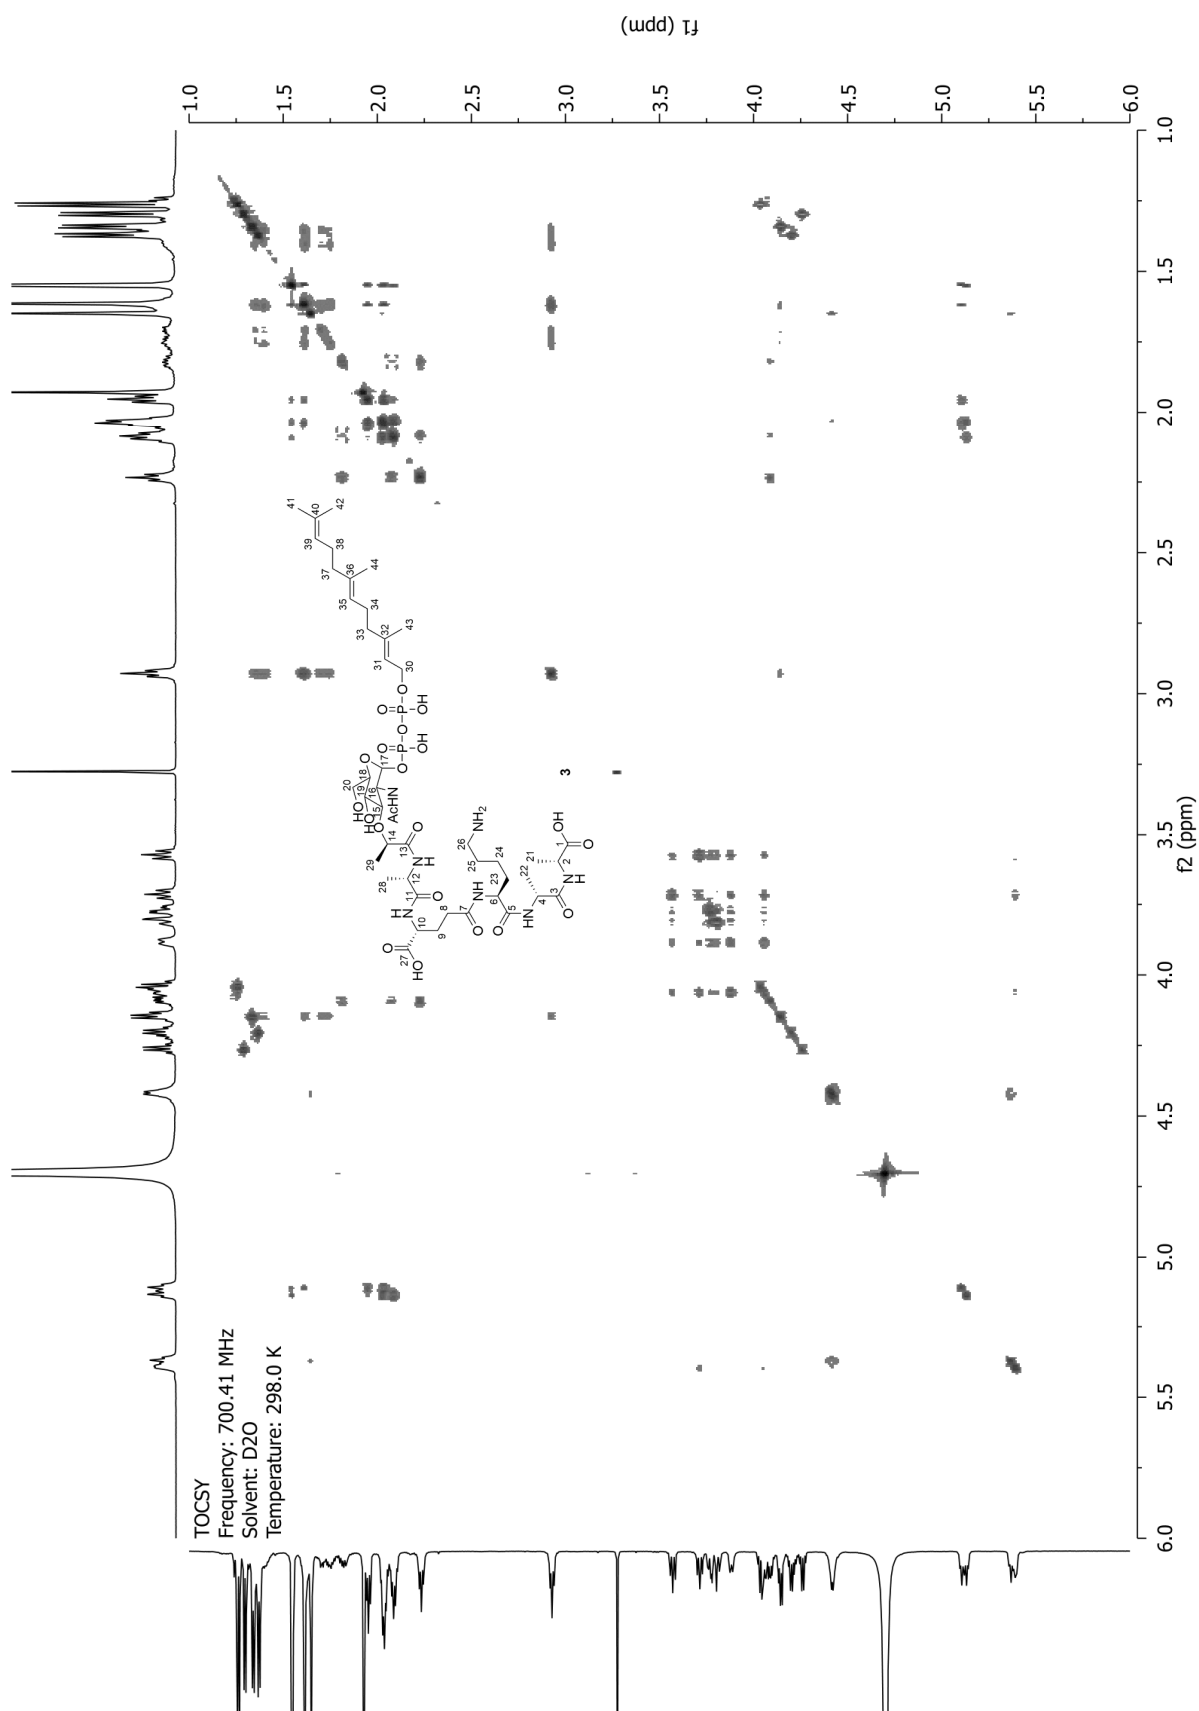

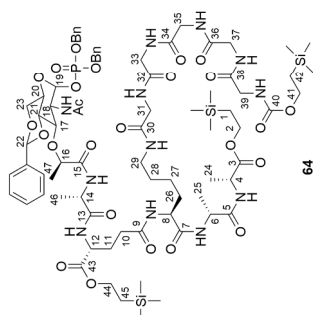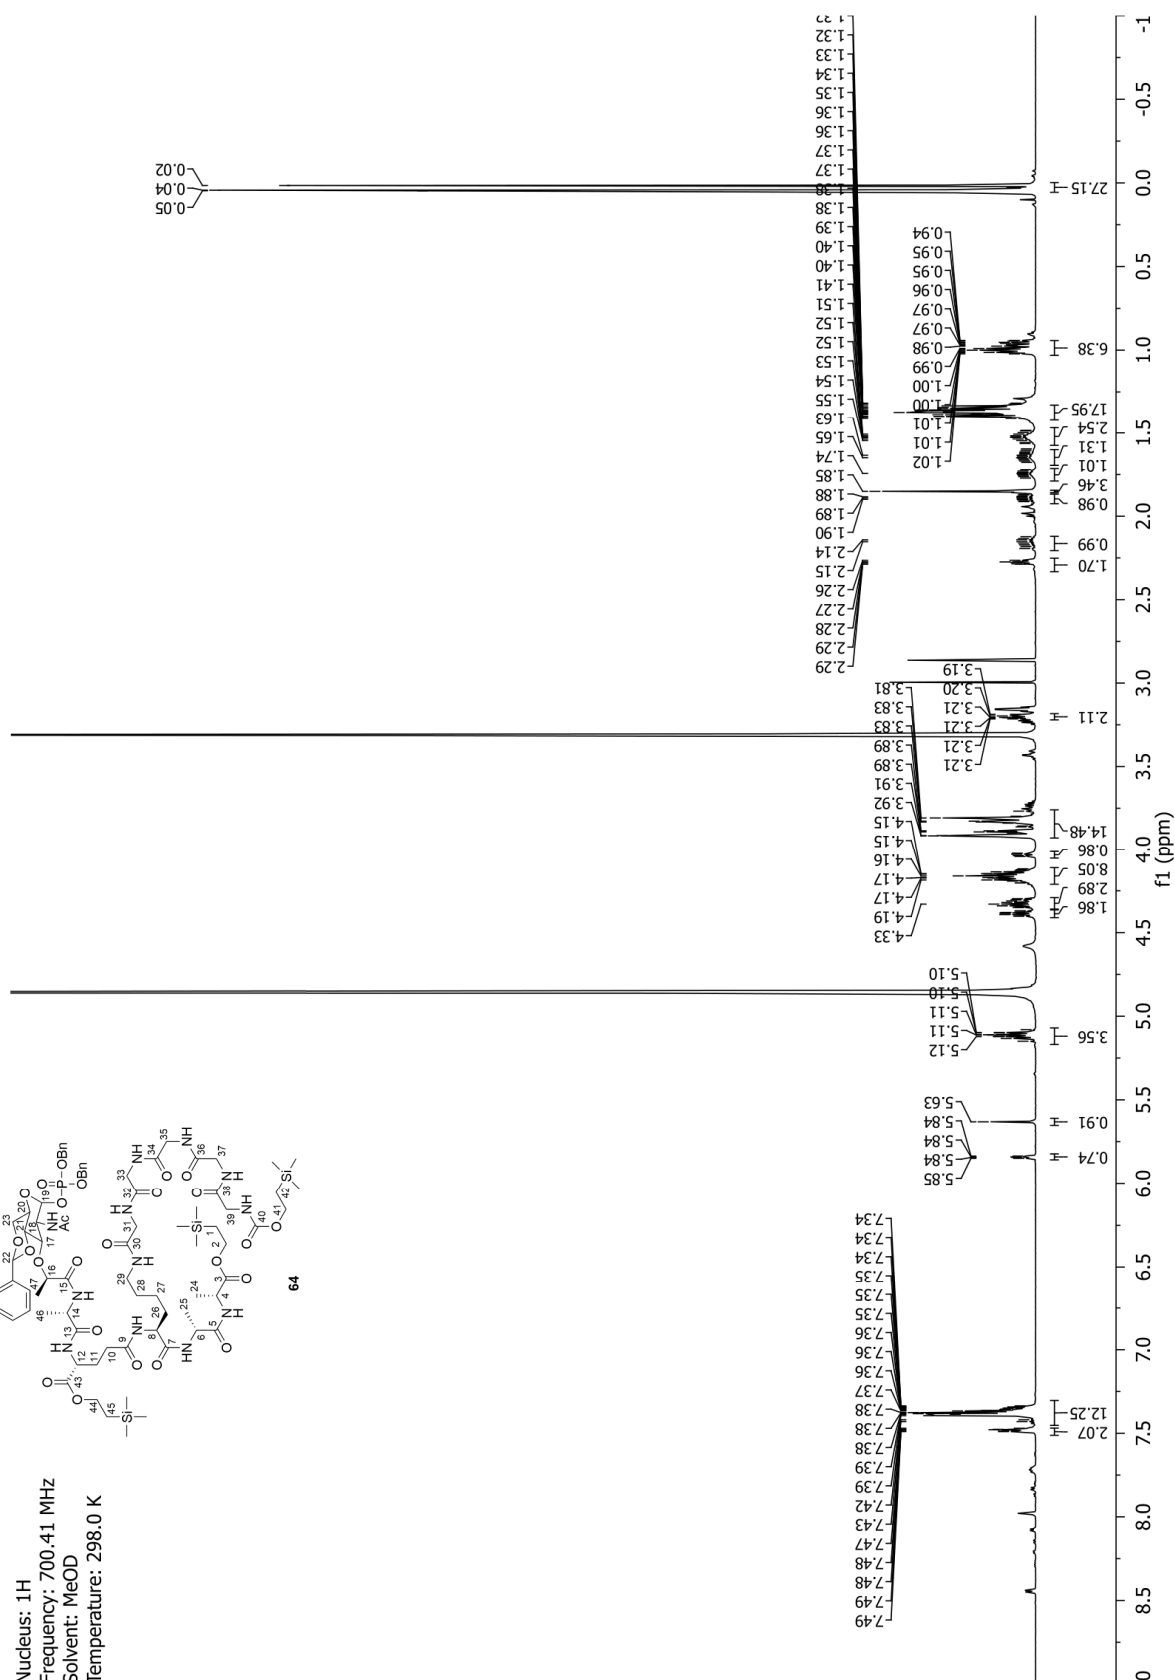

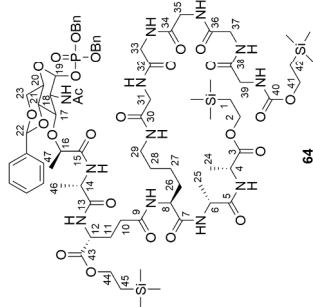

Nucleus:  $^{13}\text{C}$   
 Frequency: 176.12 MHz  
 Solvent: MeOD  
 Temperature: 298.0 K

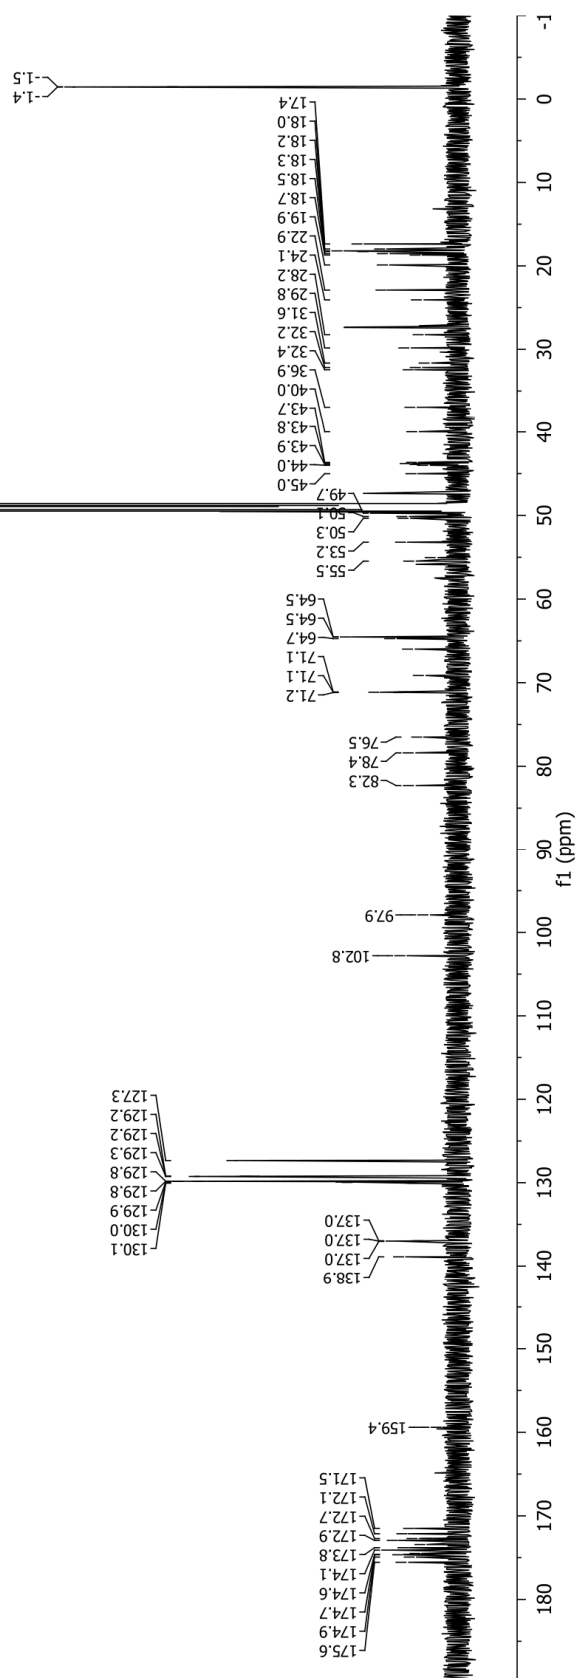

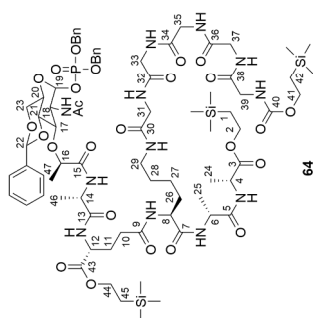

Nucleus:  $^1\text{H}$   
 Frequency: 283.53 MHz  
 Solvent: MeOD  
 Temperature: 298.0 K

2.6

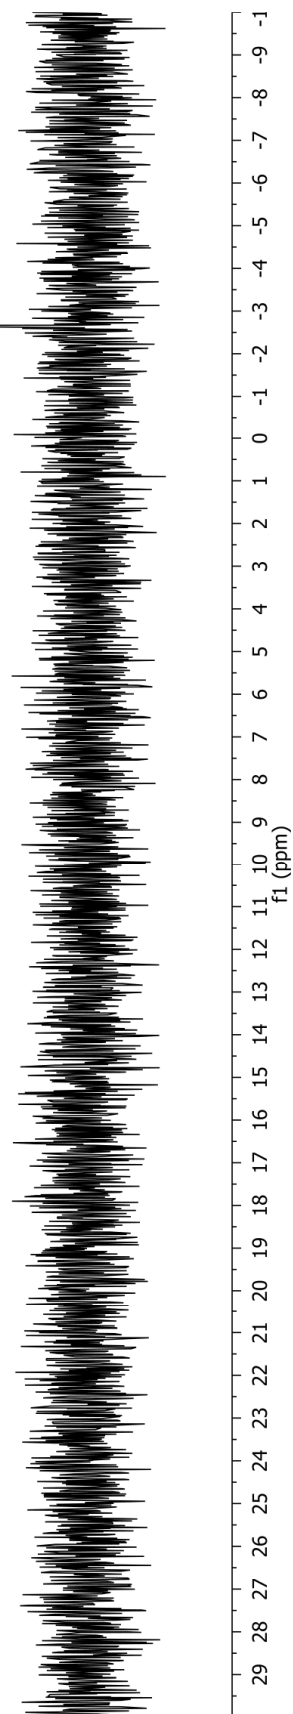

Nucleus:  $^1\text{H}$   
 Frequency: 700.41 MHz  
 Solvent: D<sub>2</sub>O  
 Temperature: 298.0 K

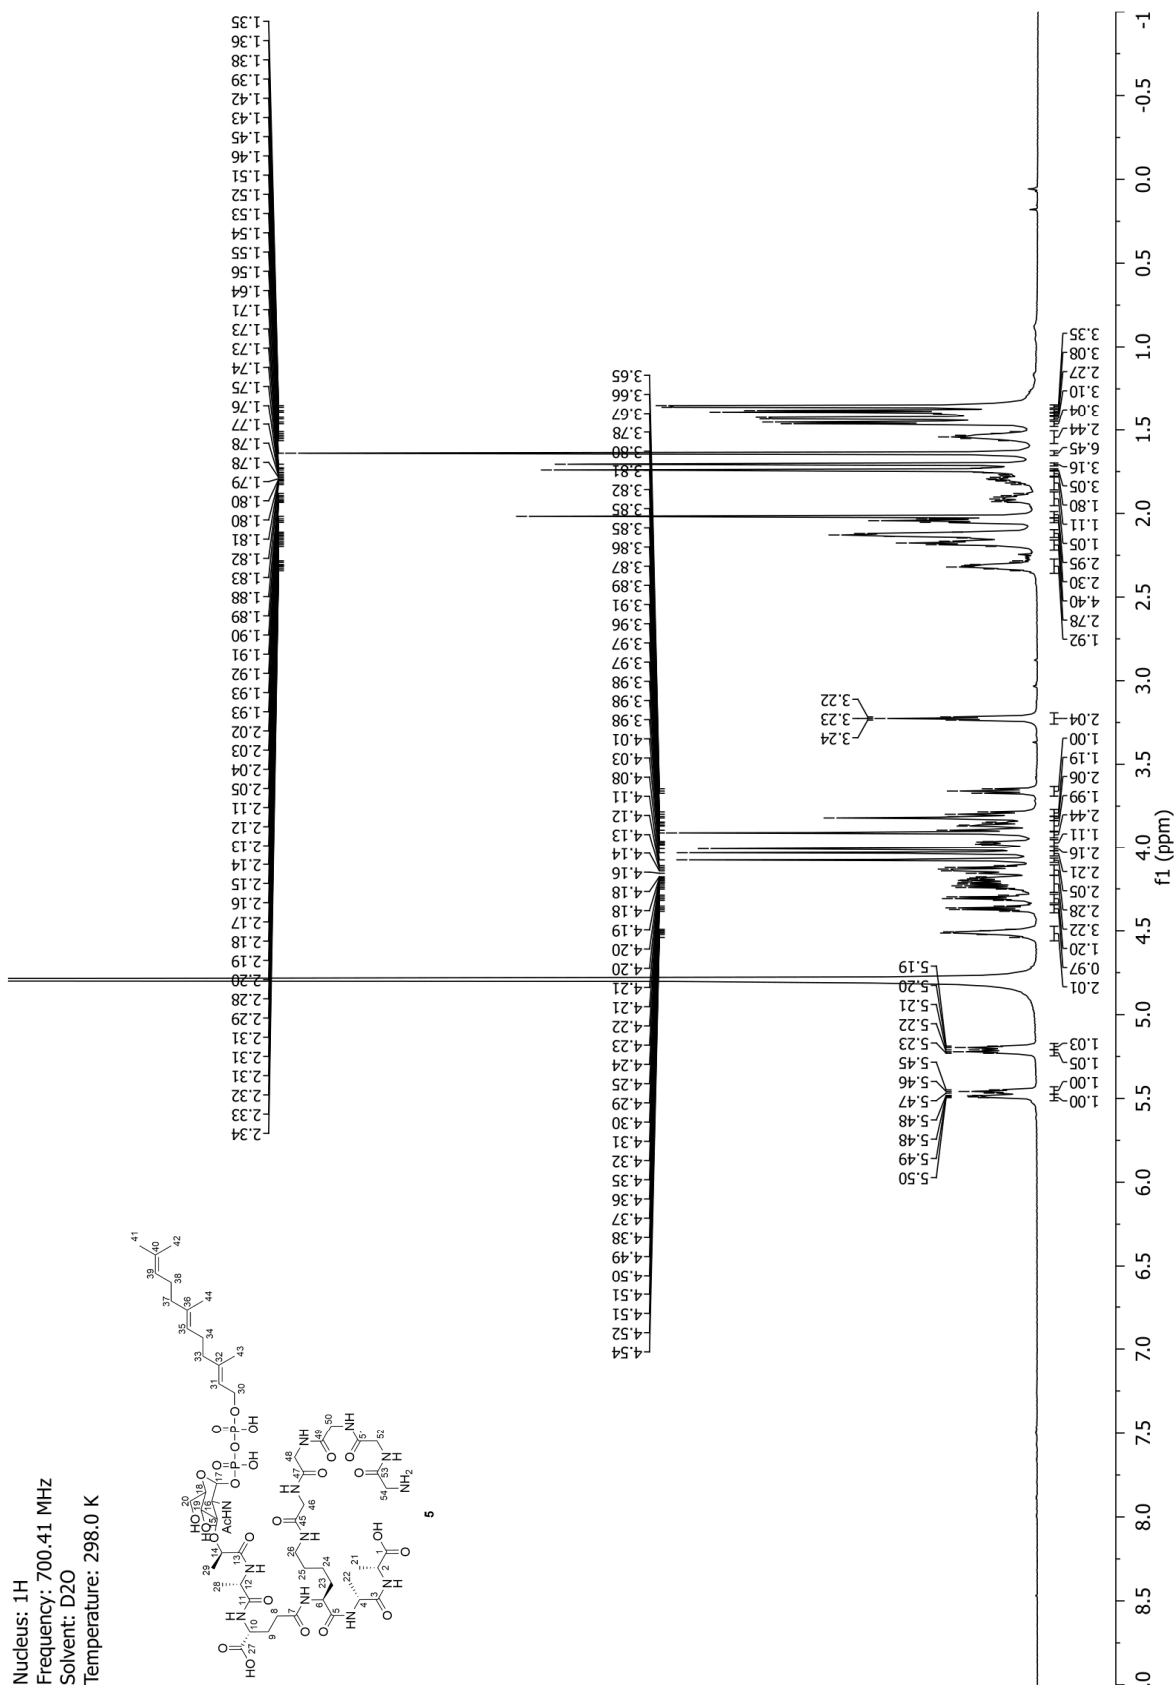

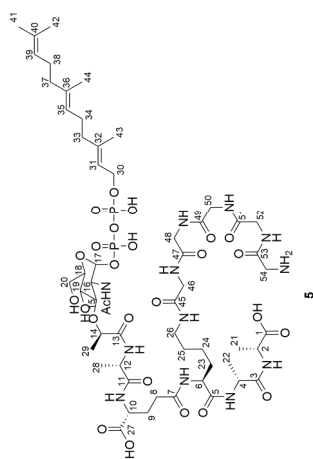

Nucleus:  $^{13}\text{C}$   
 Frequency: 176.12 MHz  
 Solvent: D<sub>2</sub>O  
 Temperature: 298.0 K

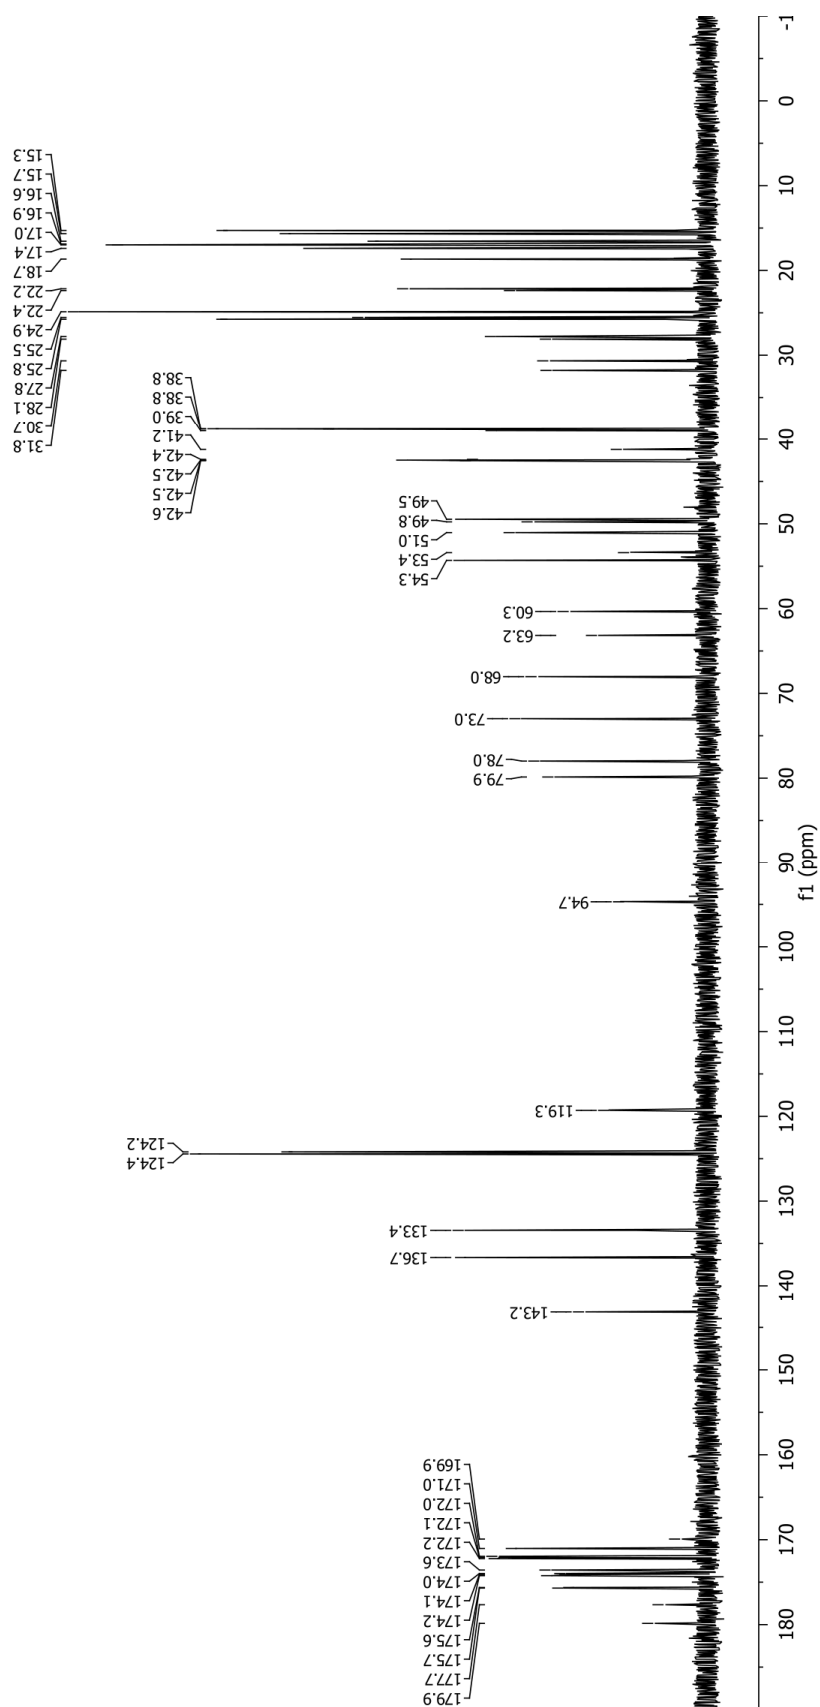

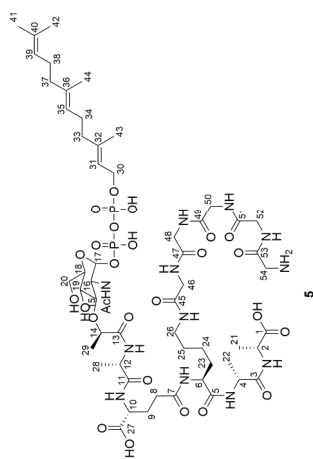

Nucleus:  $^{31}\text{P}$   
 Frequency: 161.98 MHz  
 Solvent: D<sub>2</sub>O  
 Temperature: 298.0 K

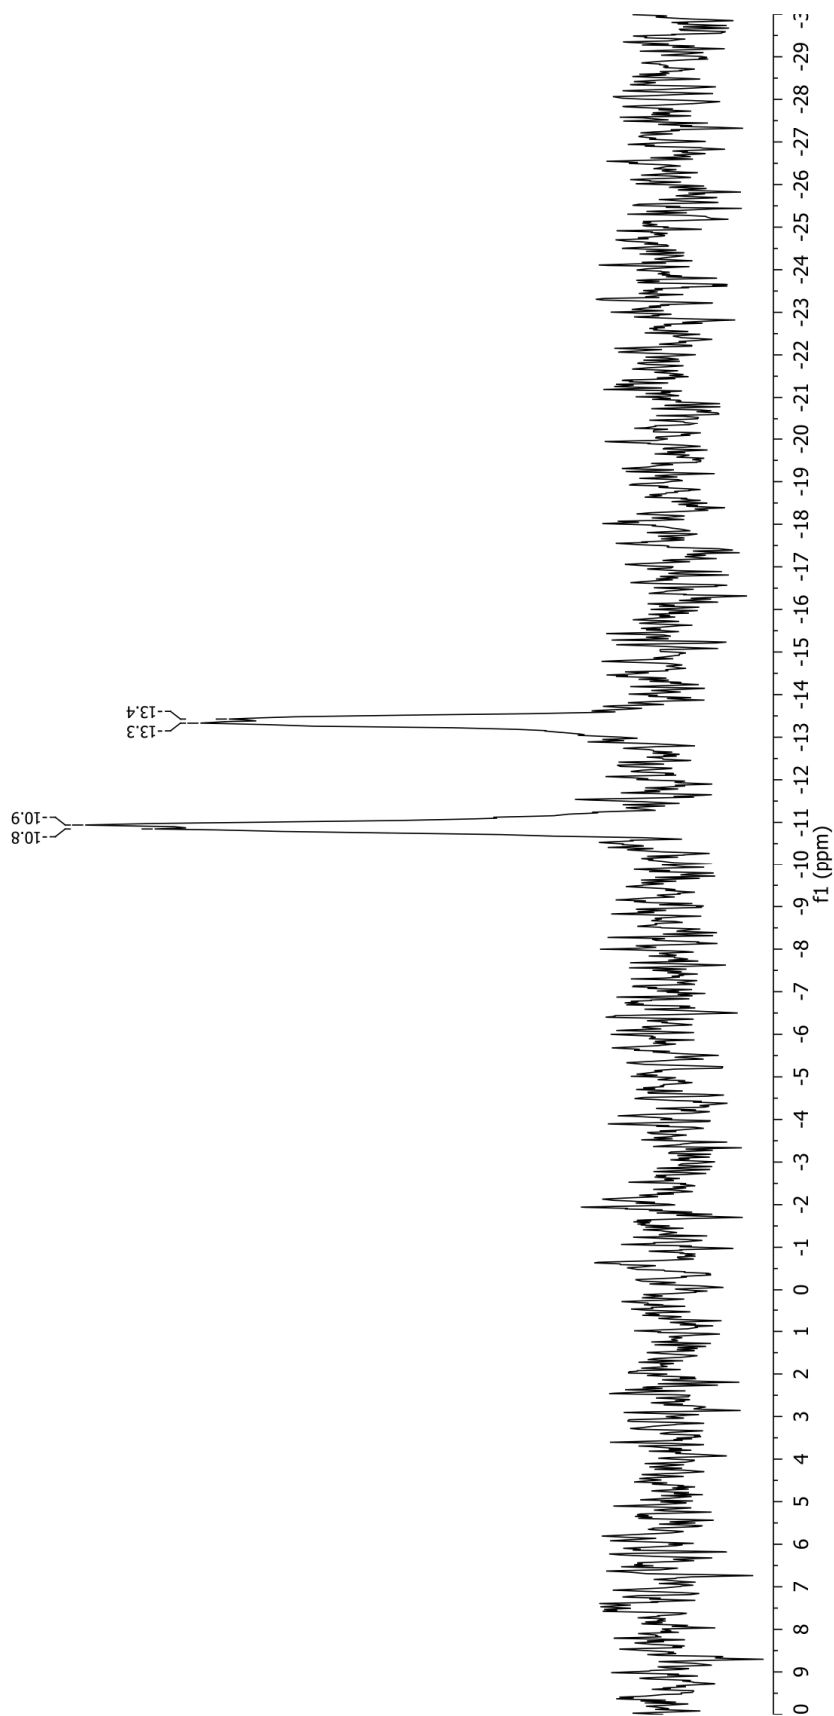



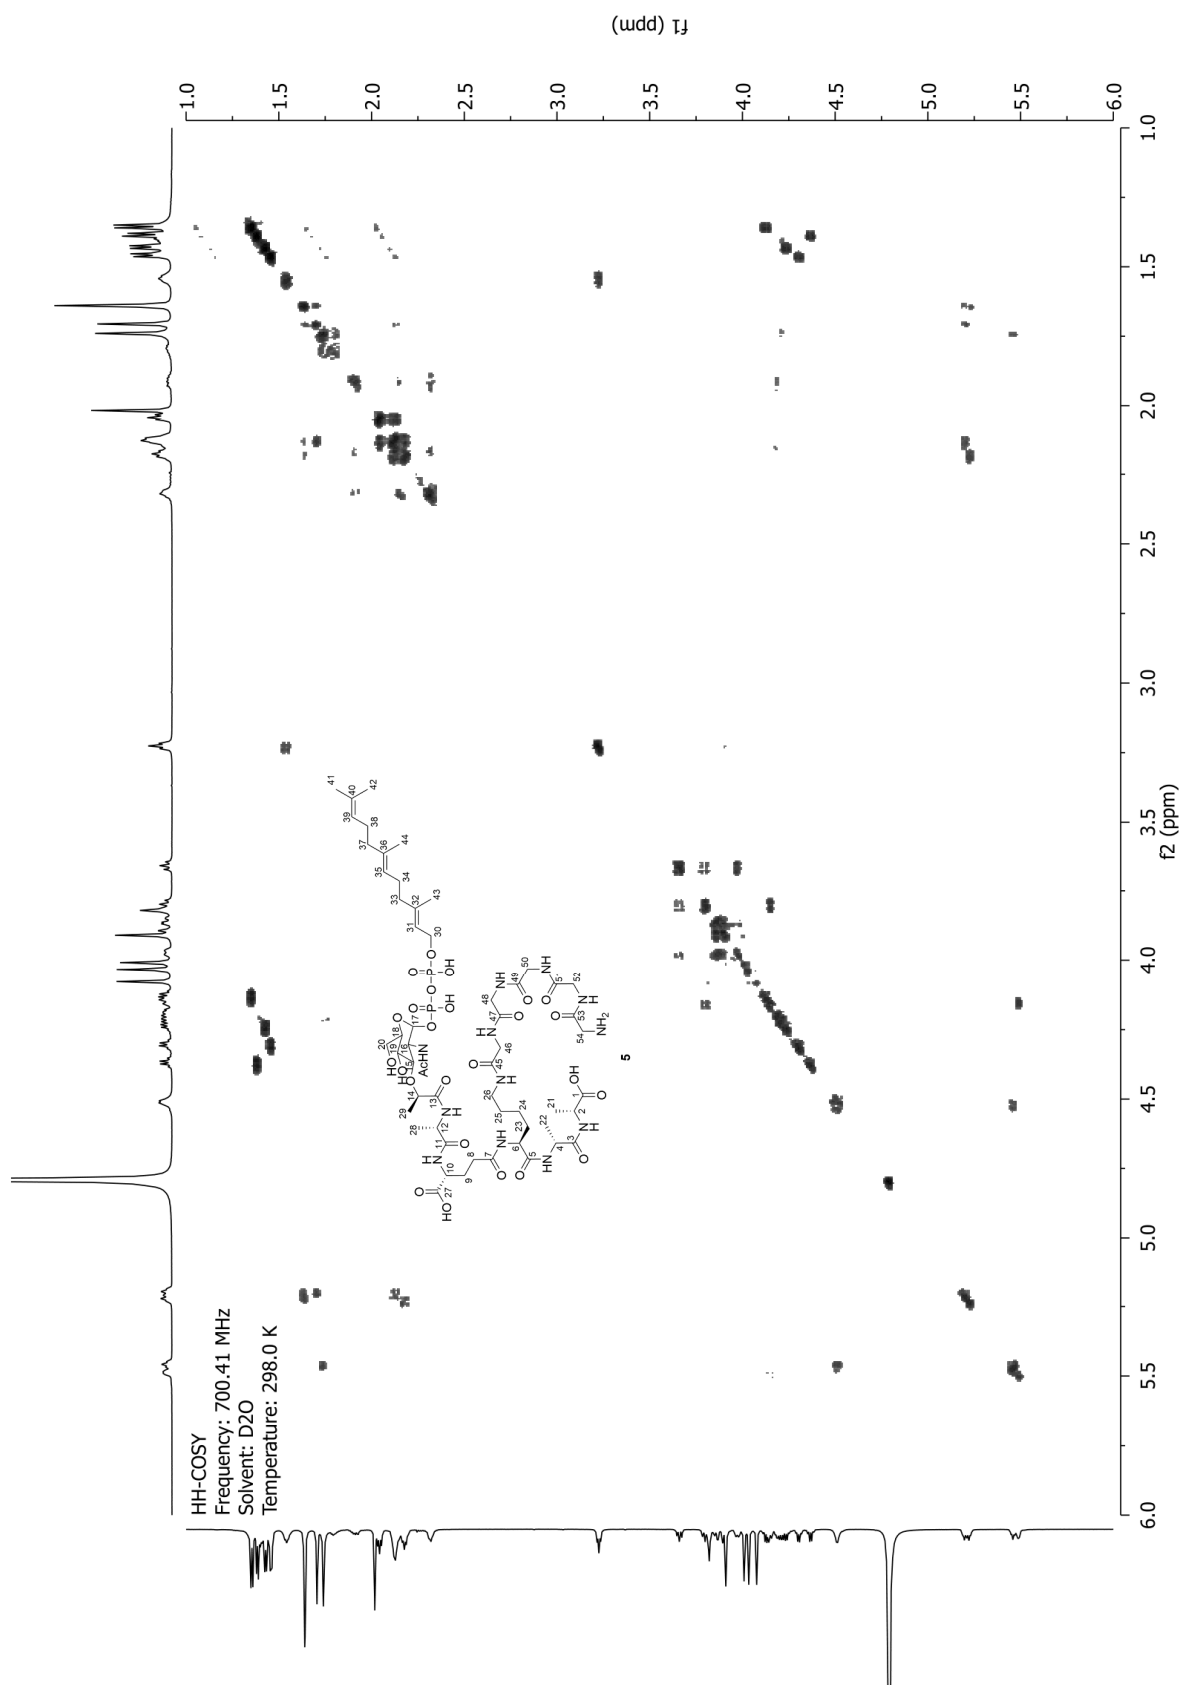

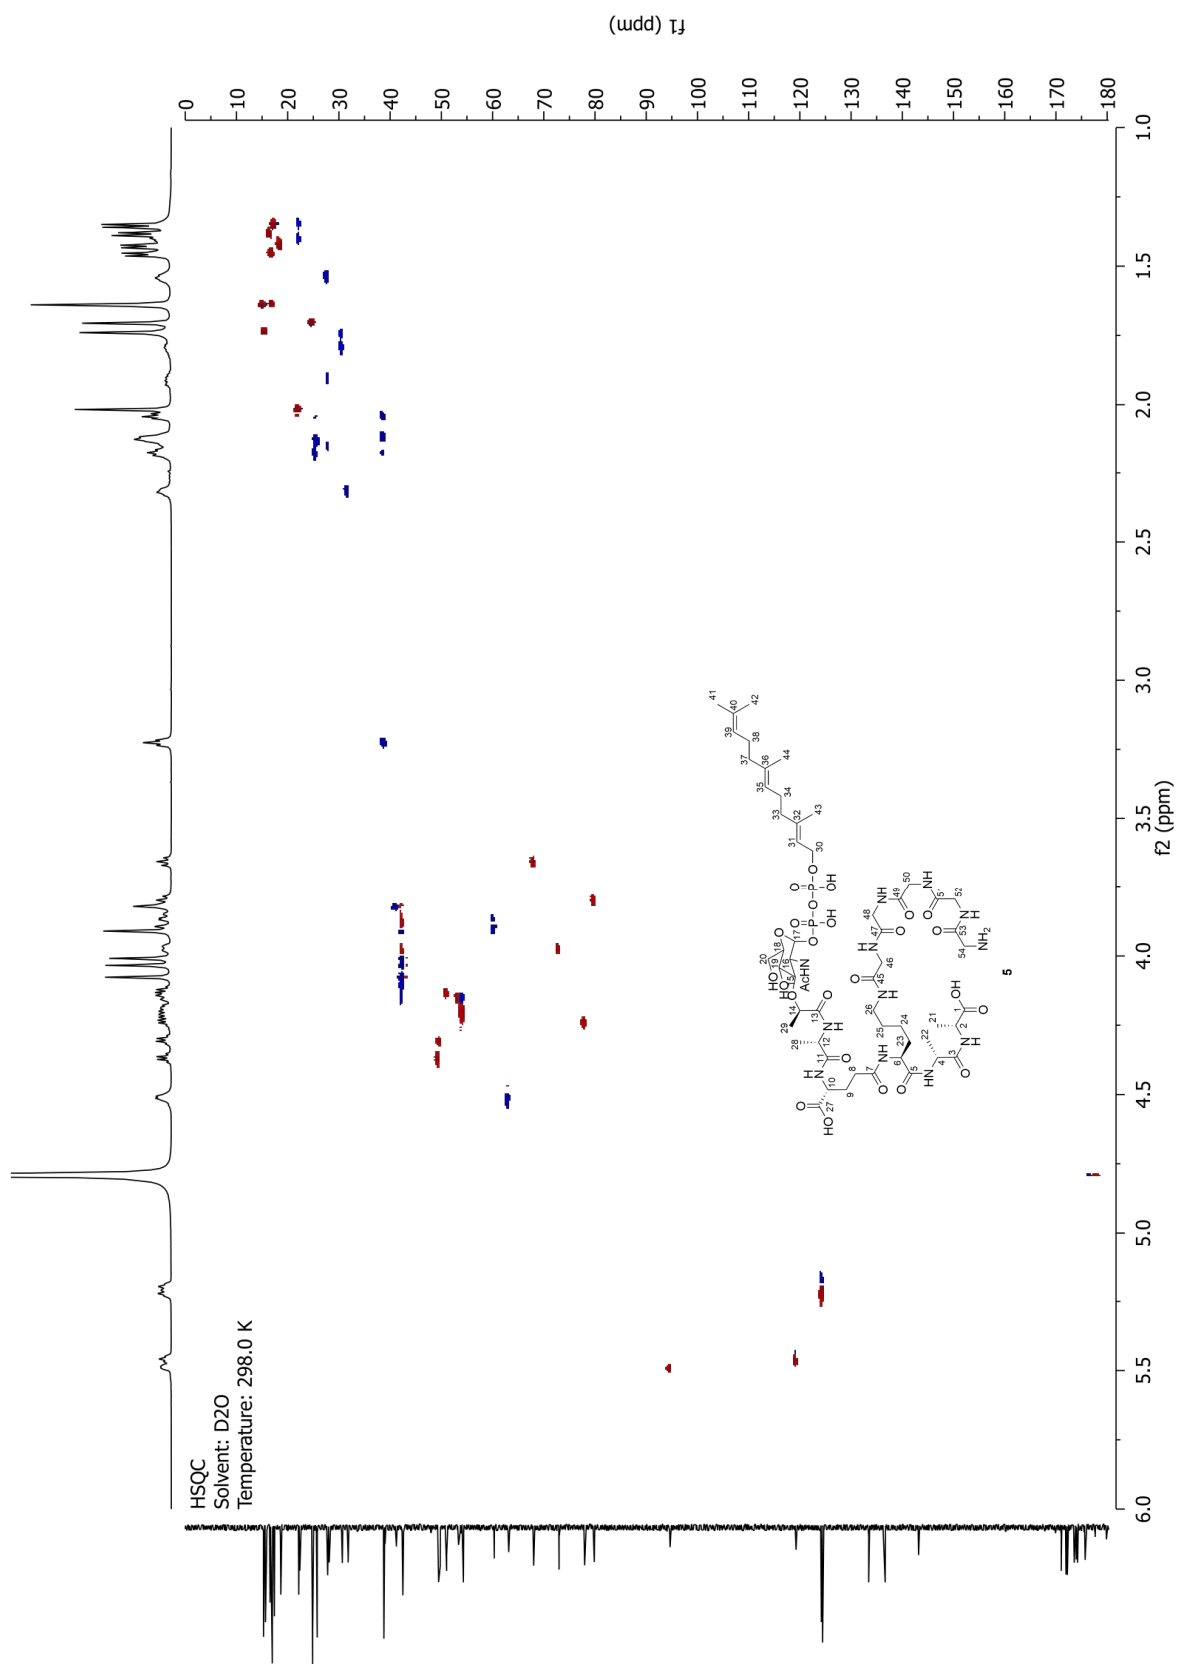

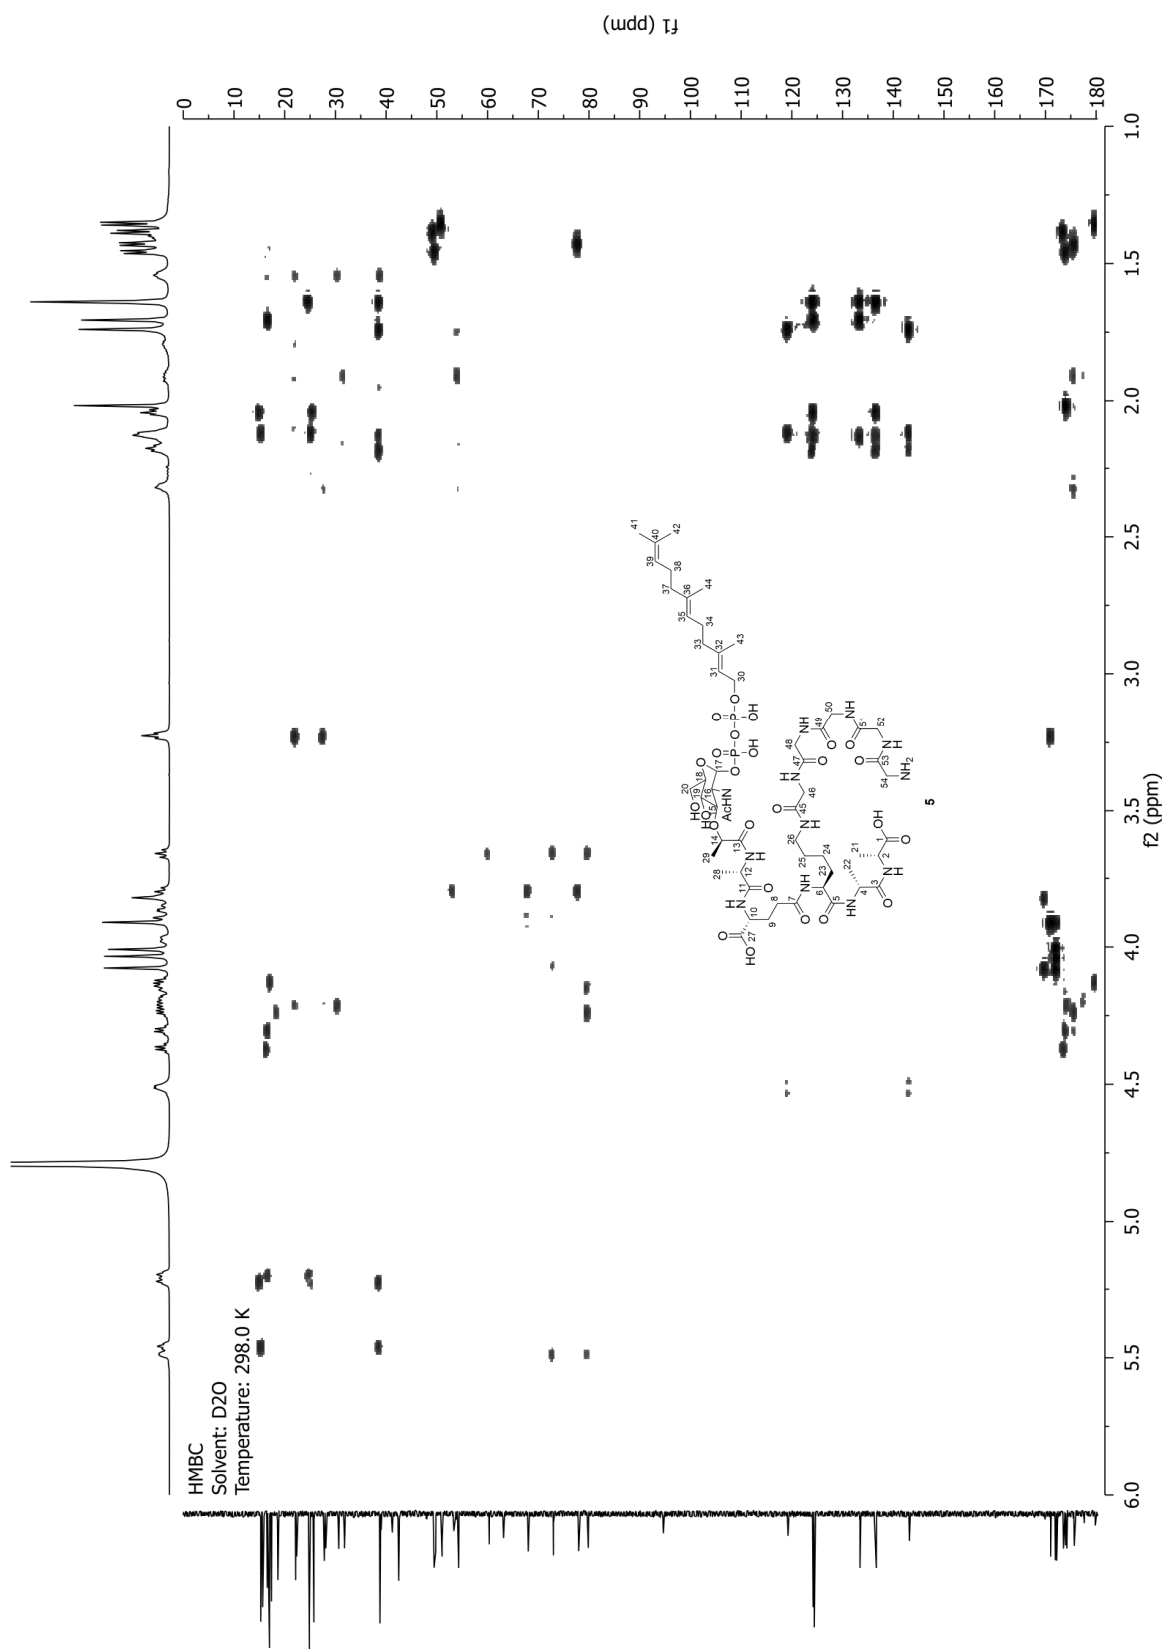

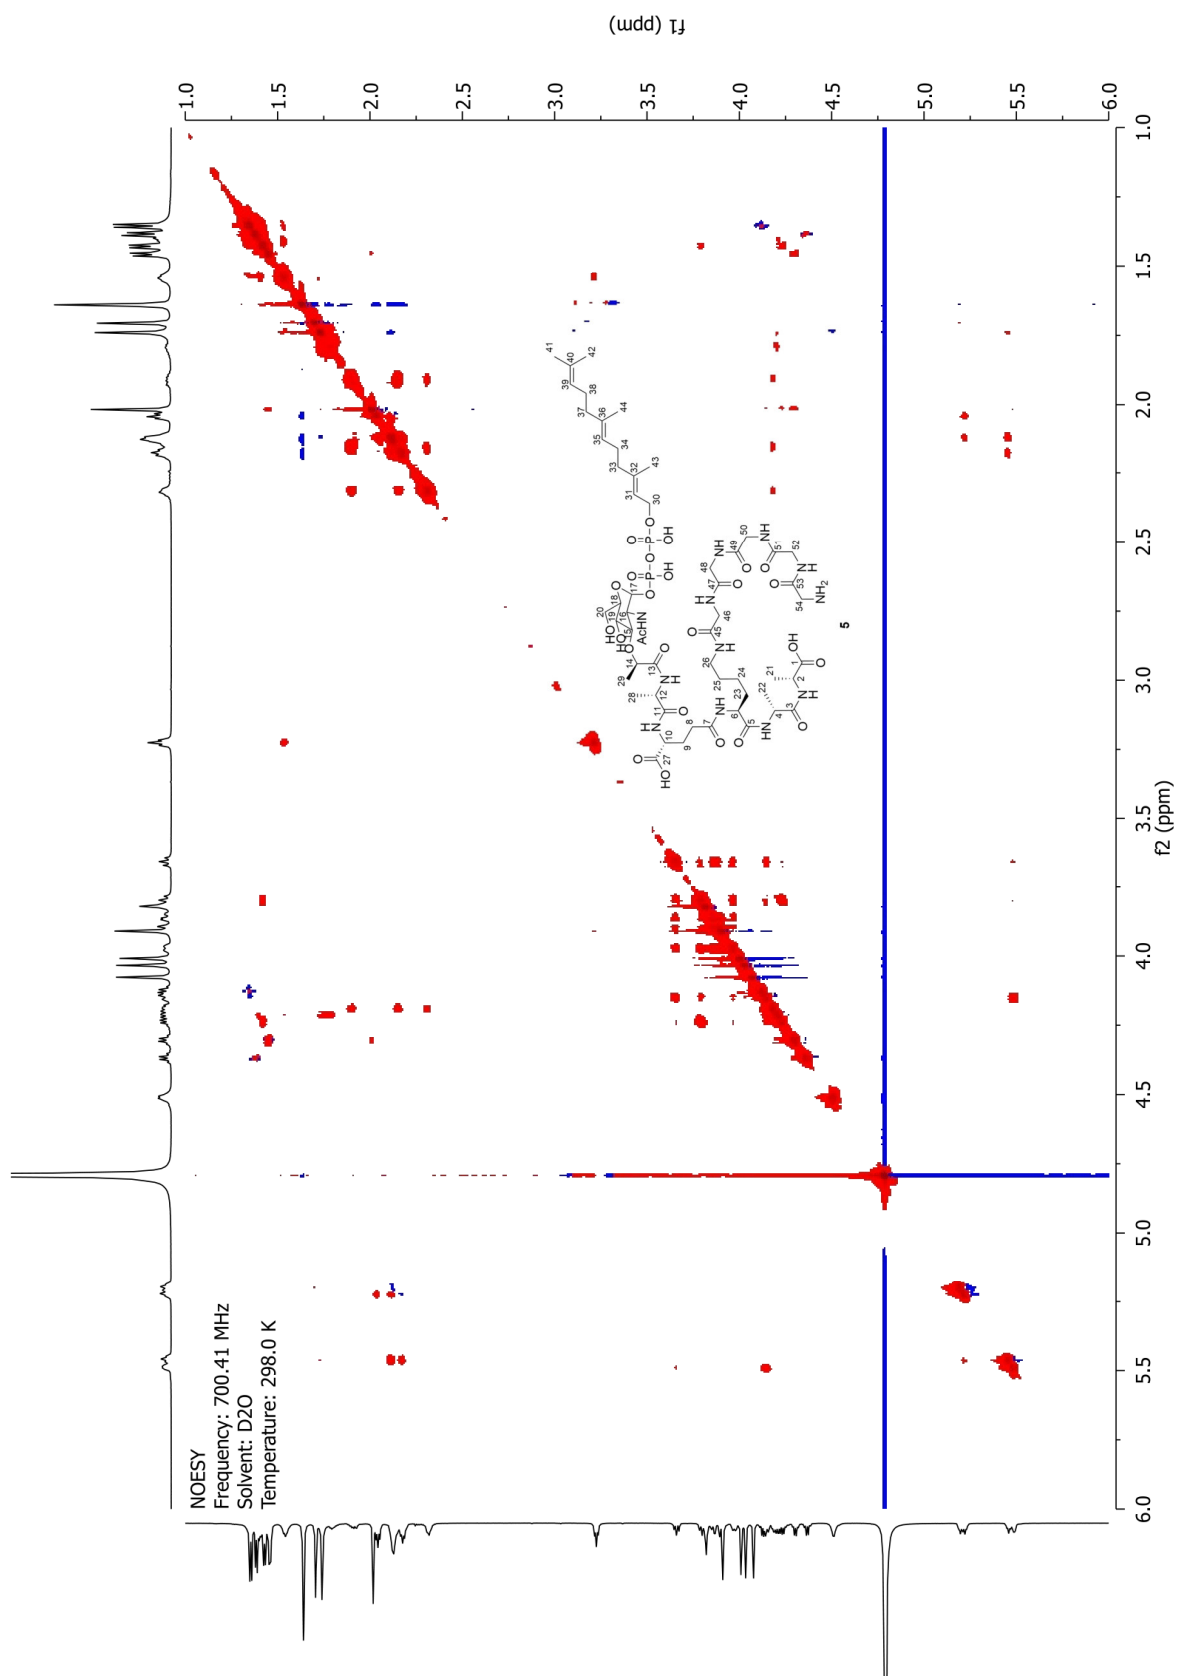

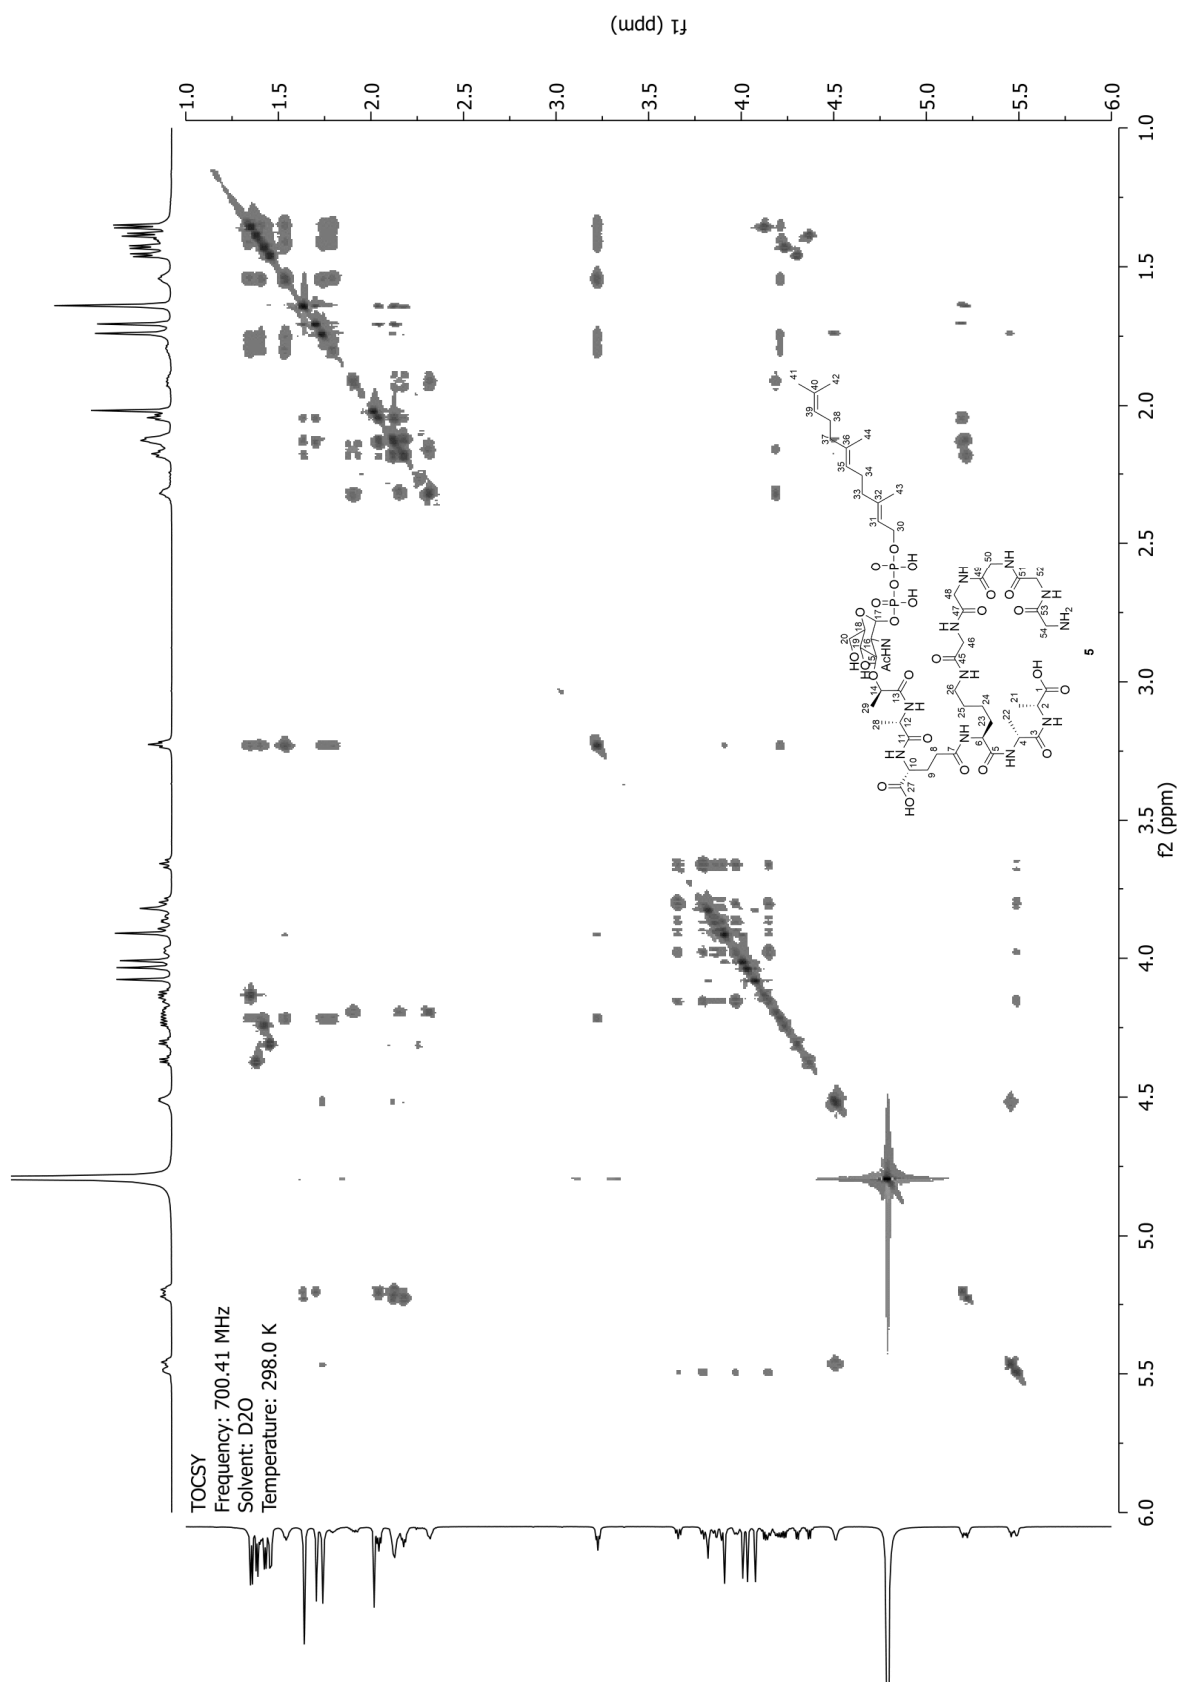

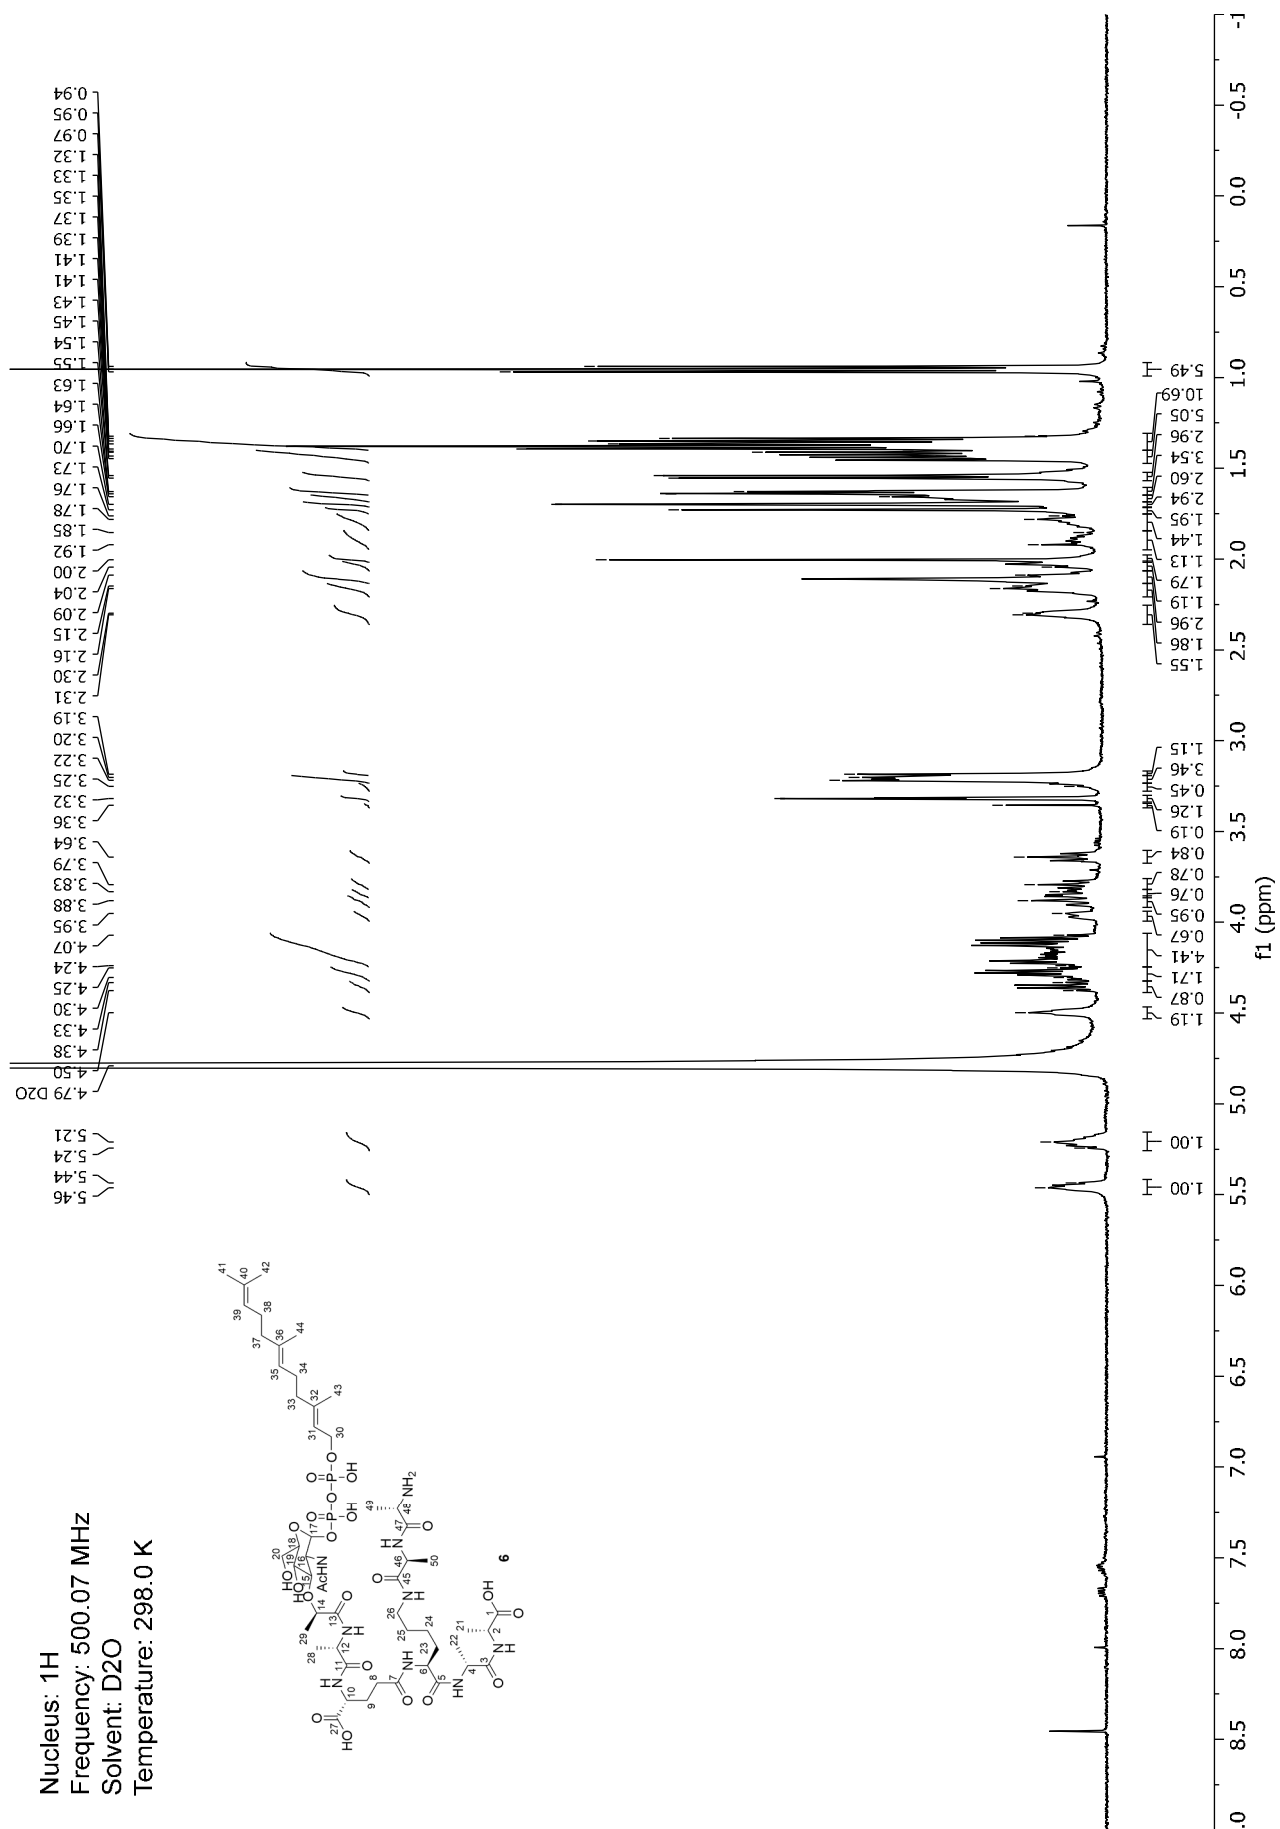

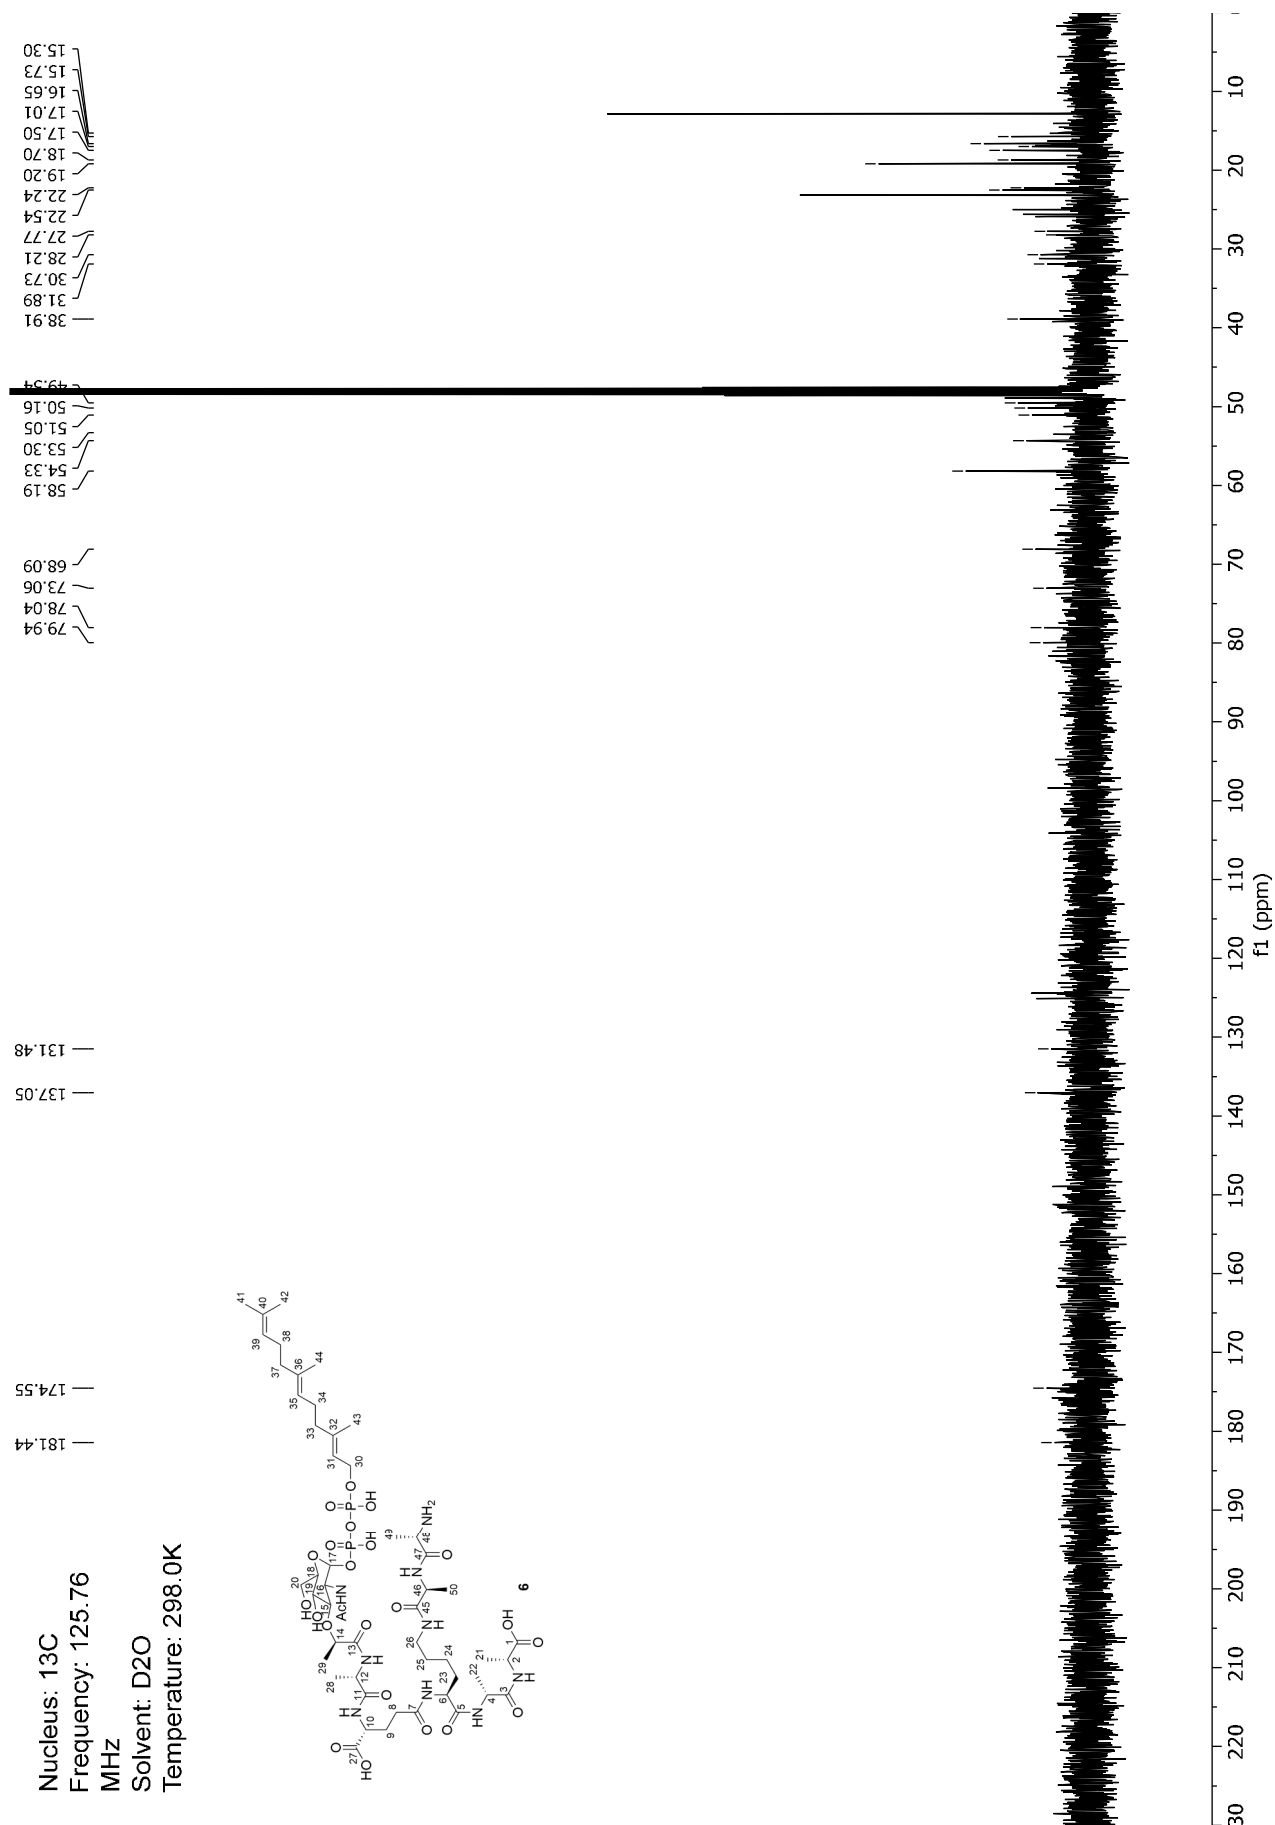

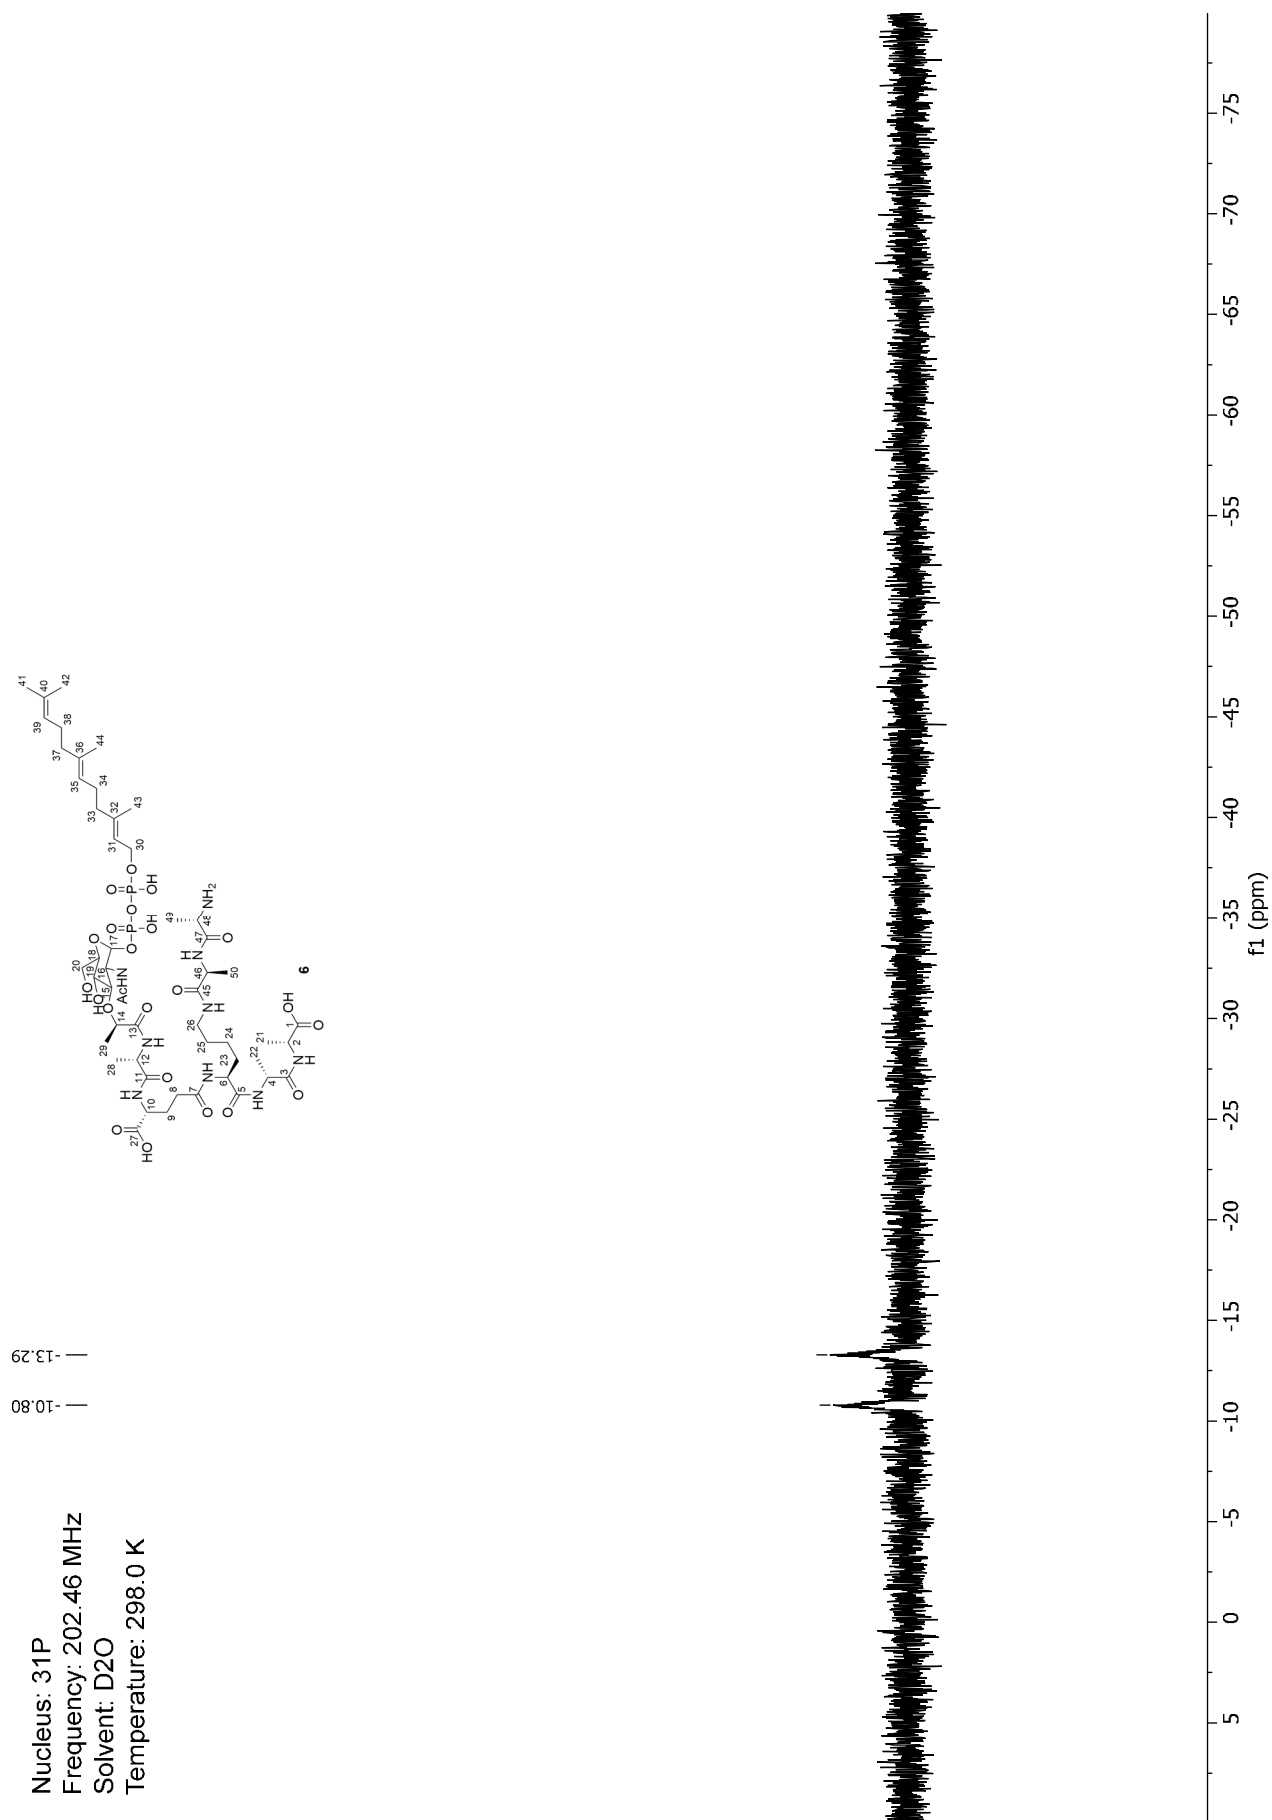



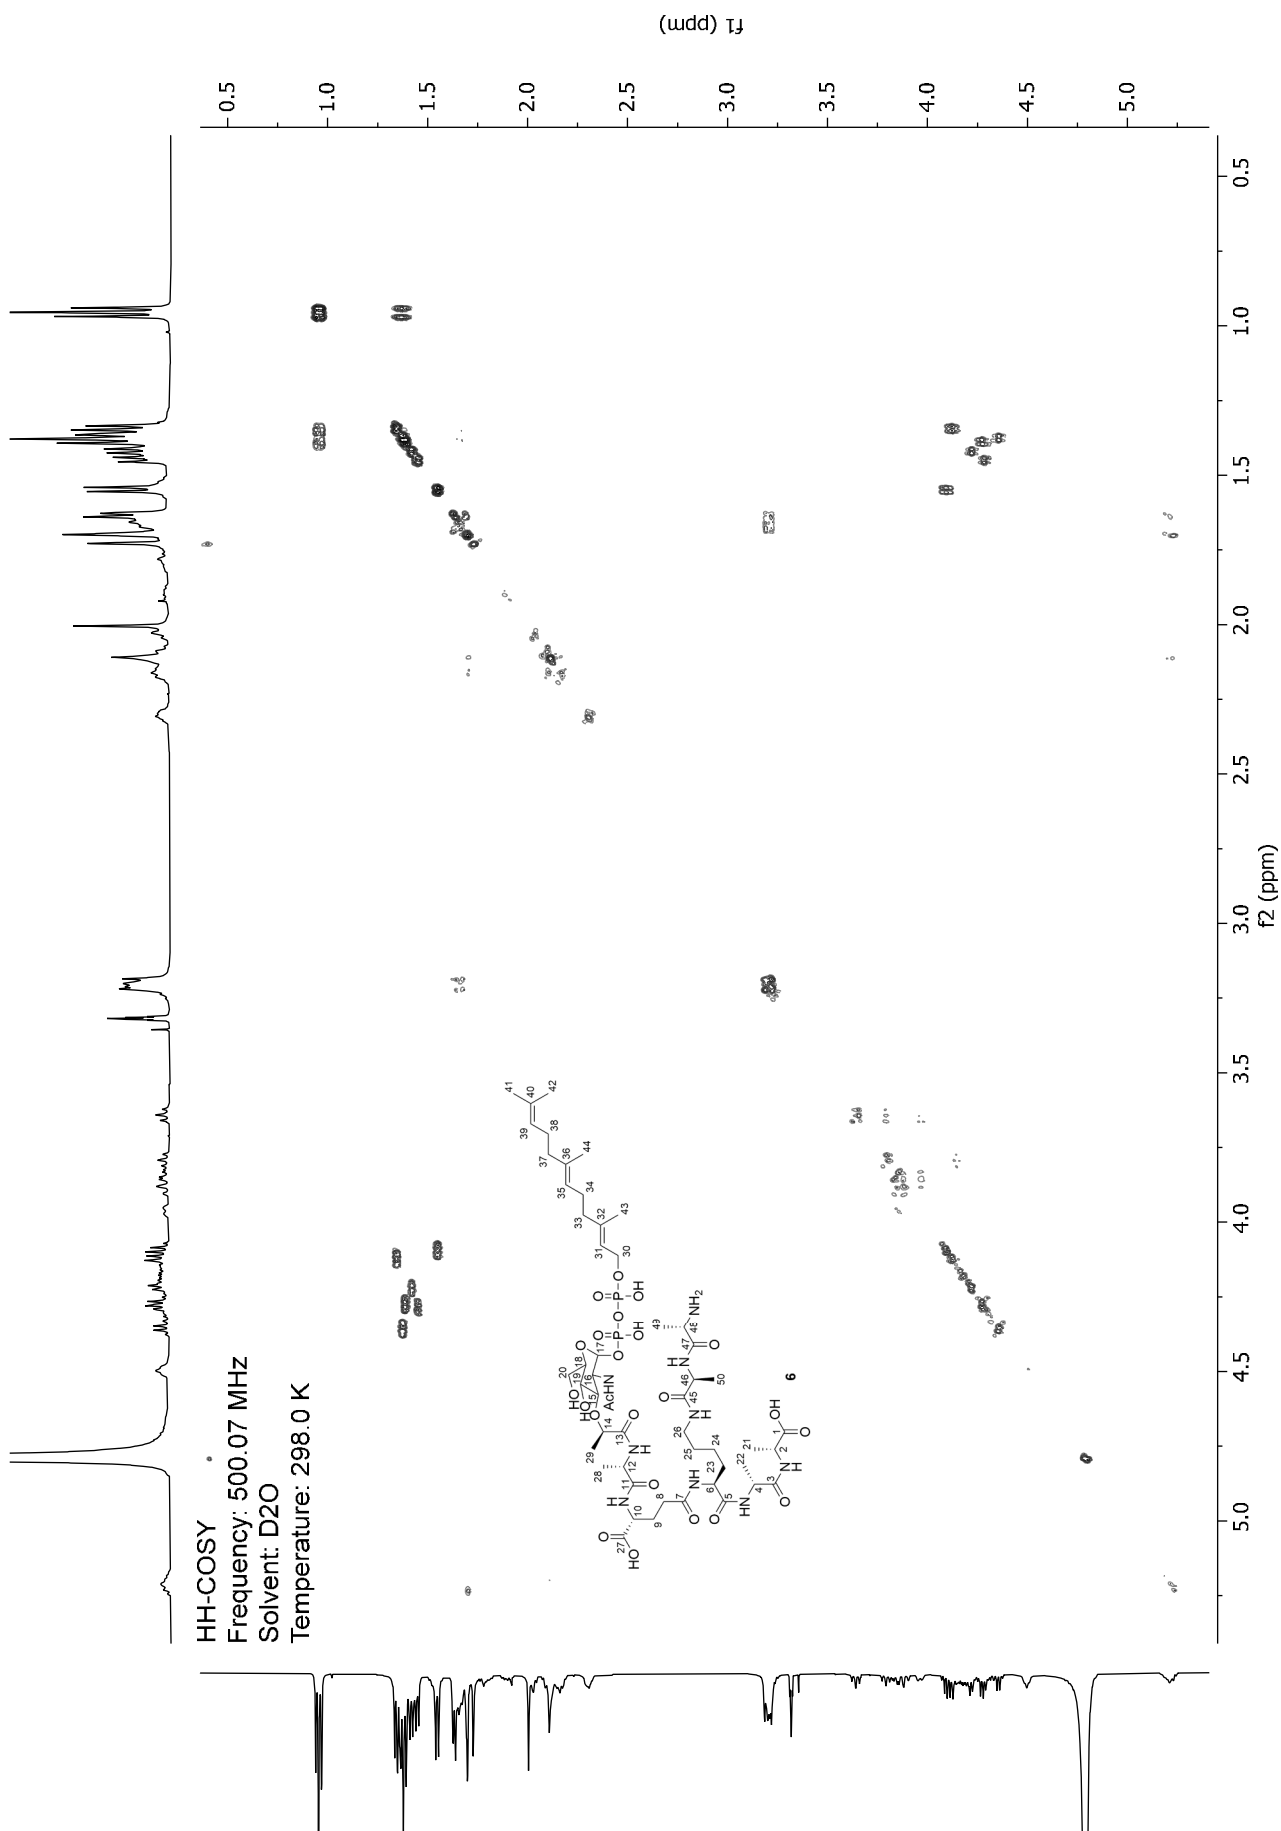

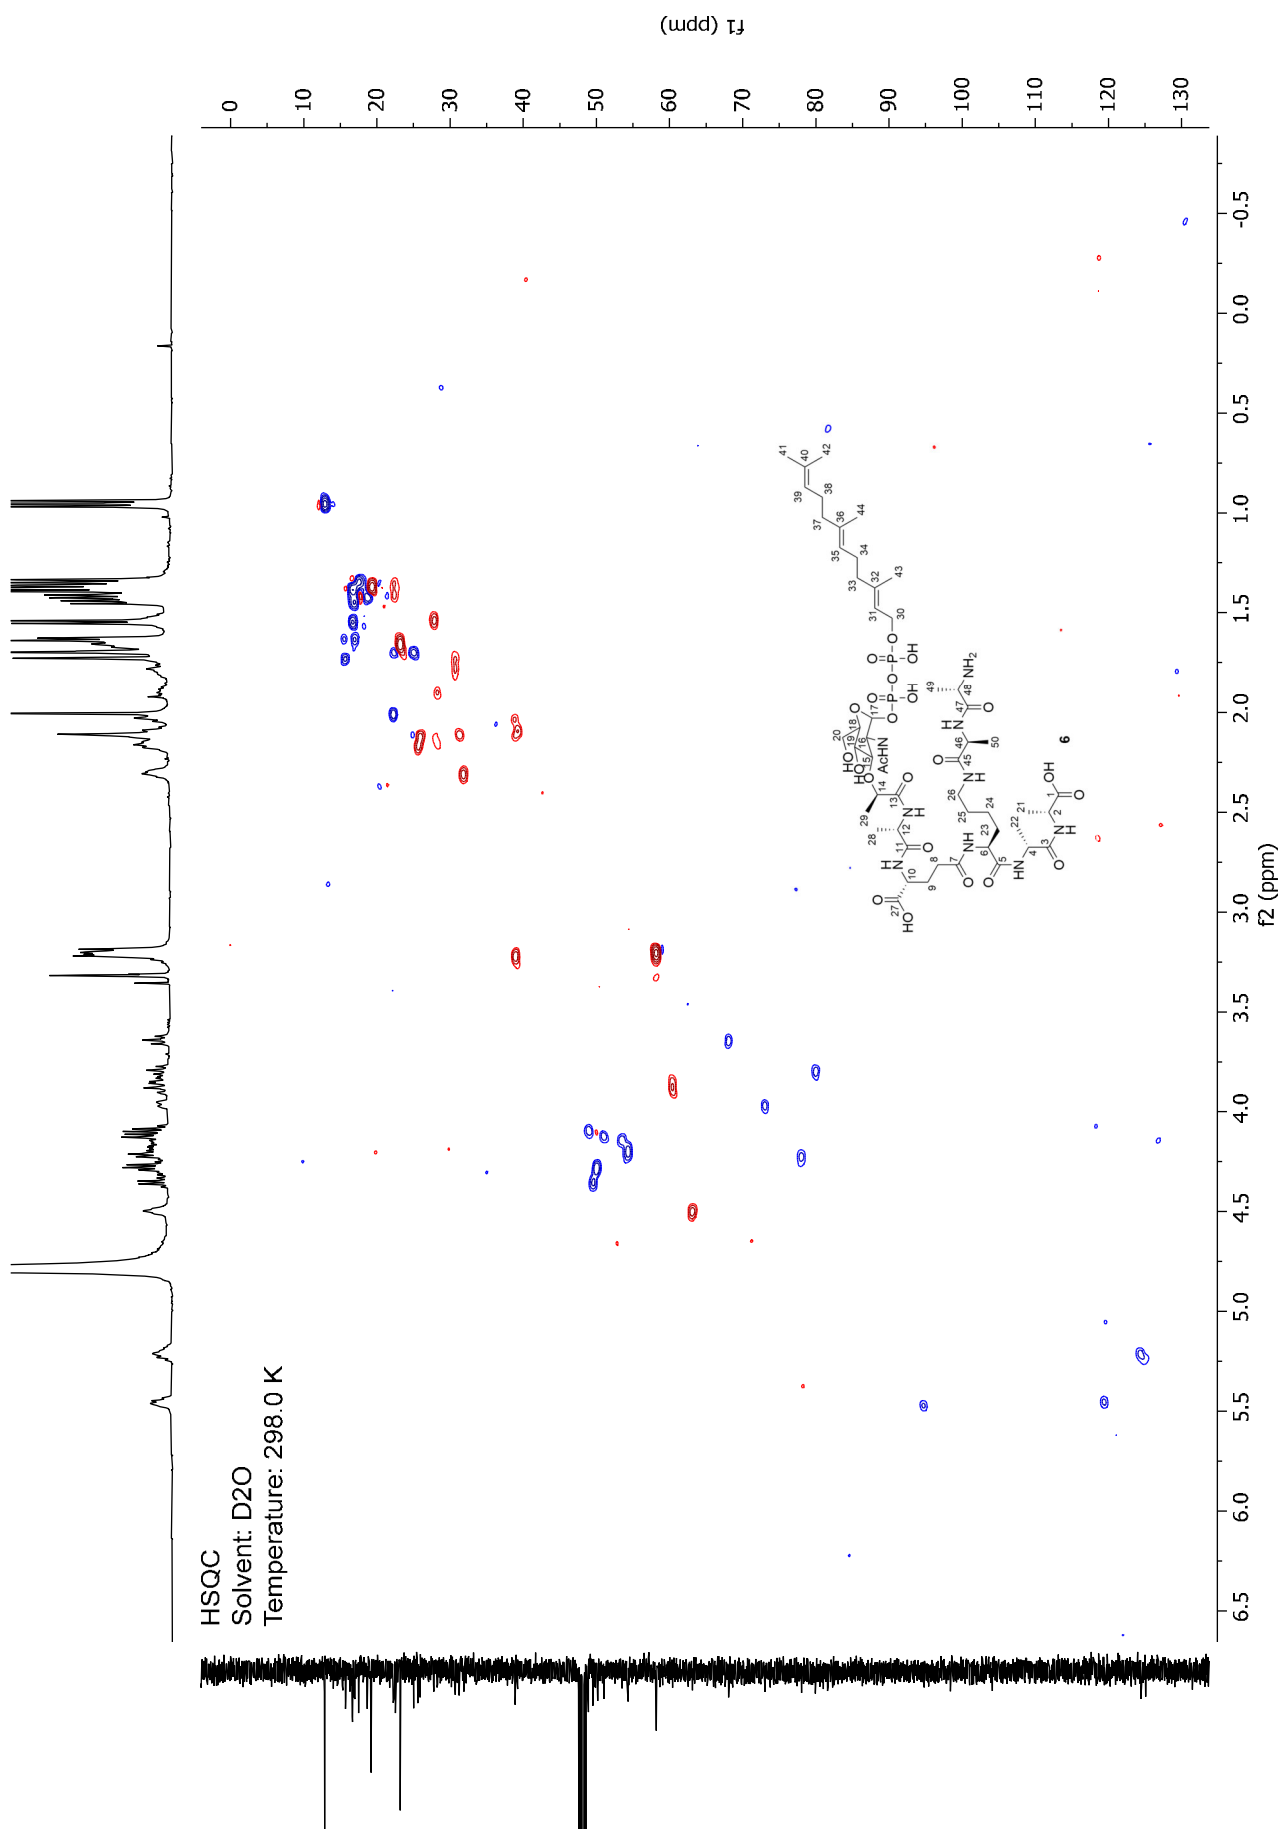

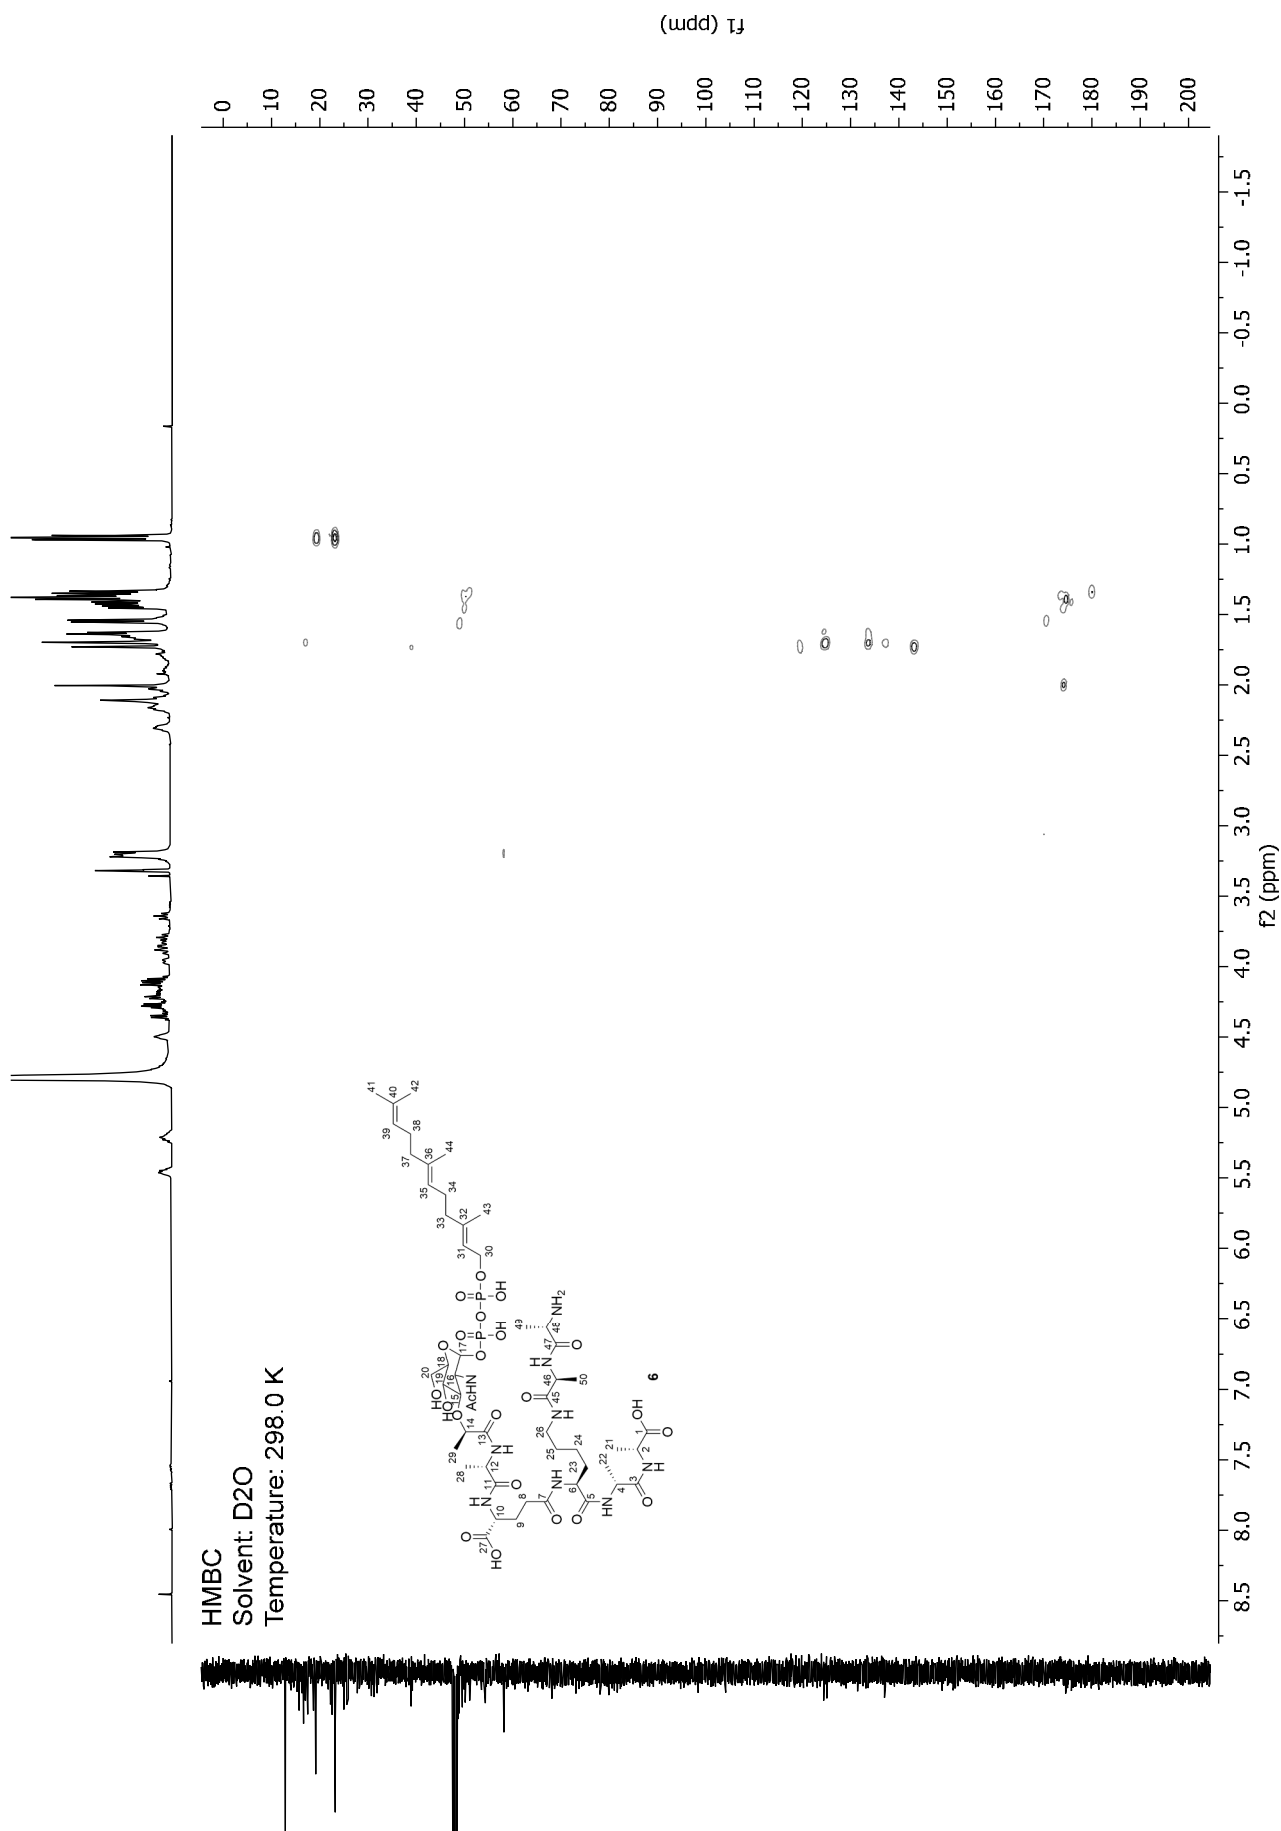

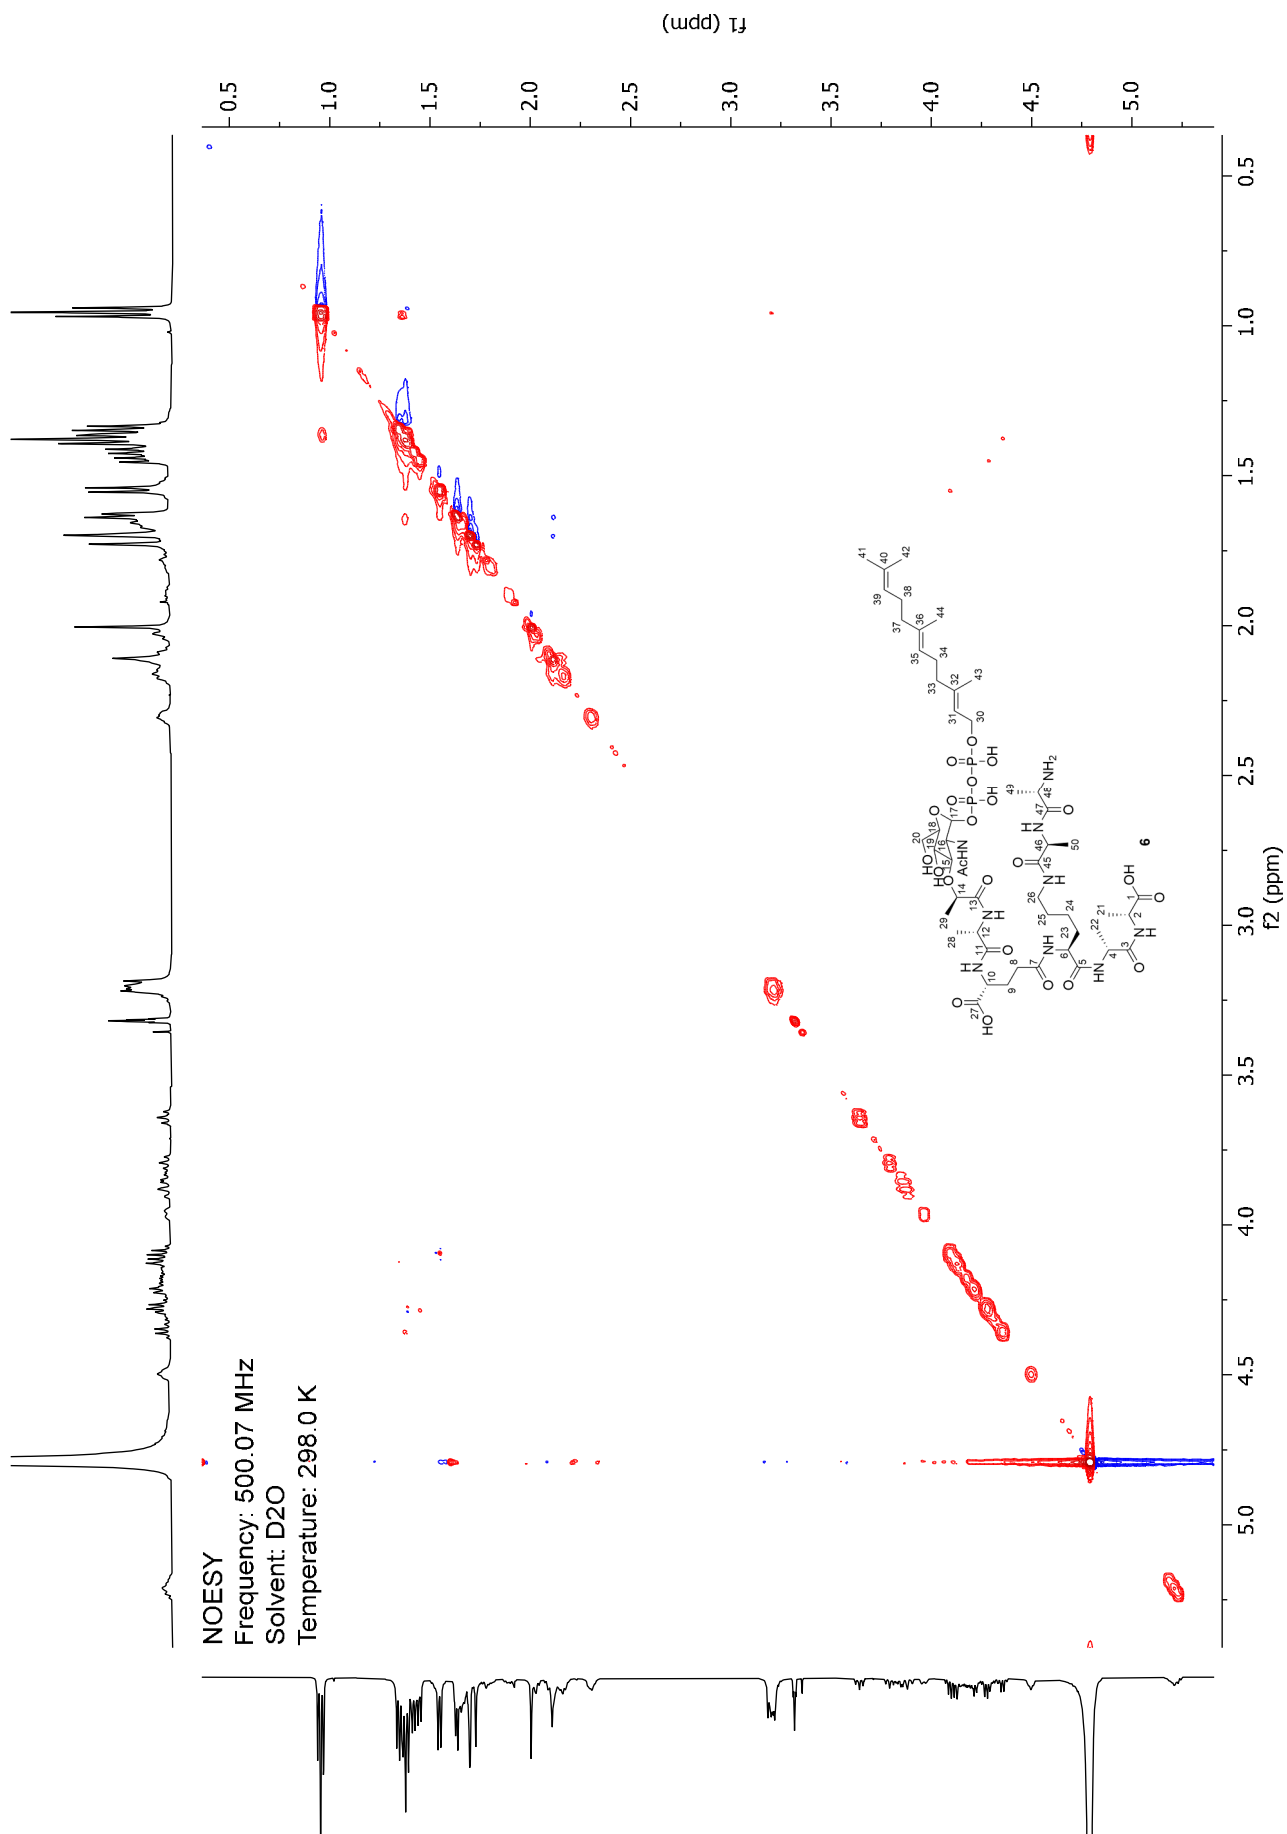

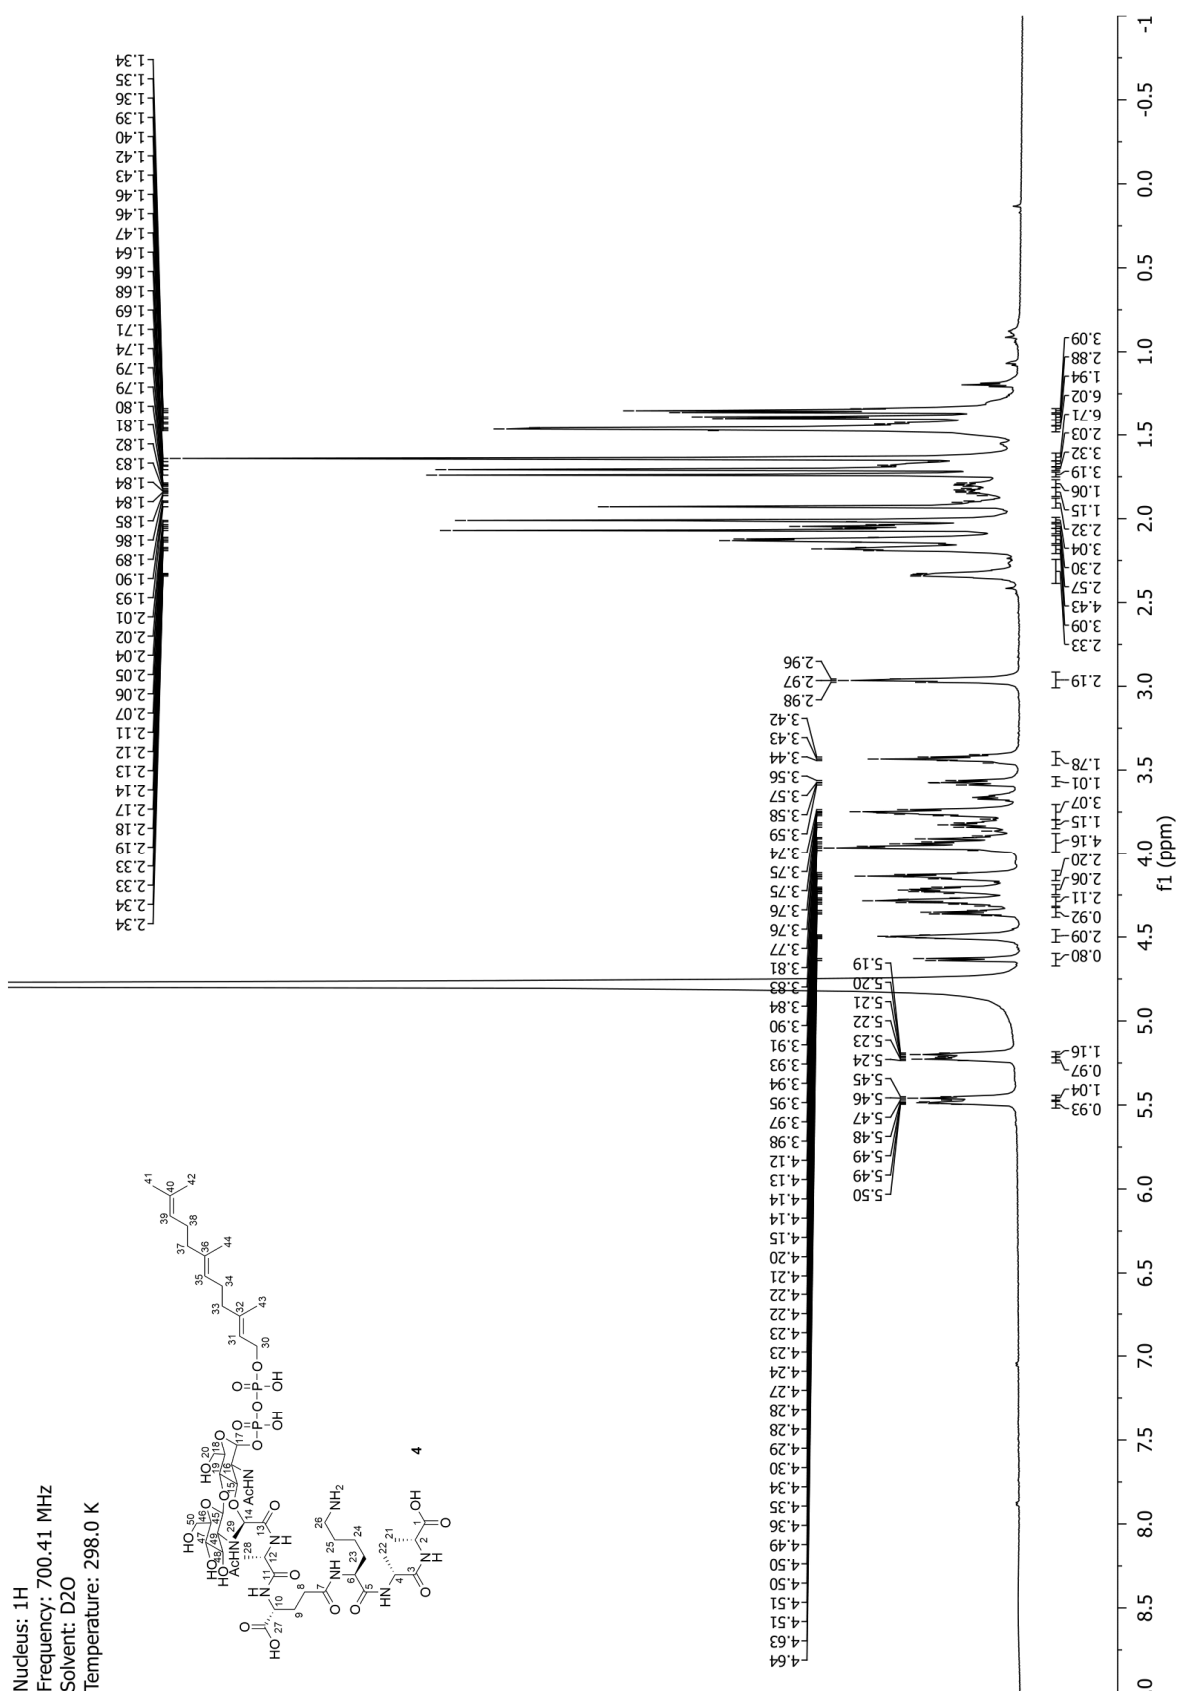

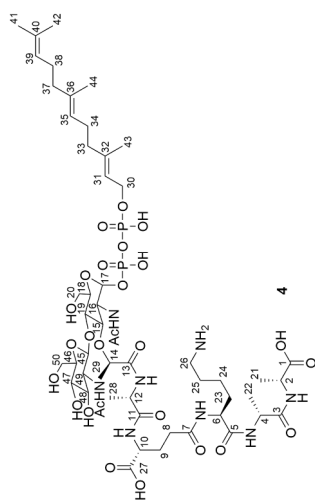

Nucleus:  $^{13}\text{C}$   
 Frequency: 176.12 MHz  
 Solvent: D<sub>2</sub>O  
 Temperature: 298.0 K

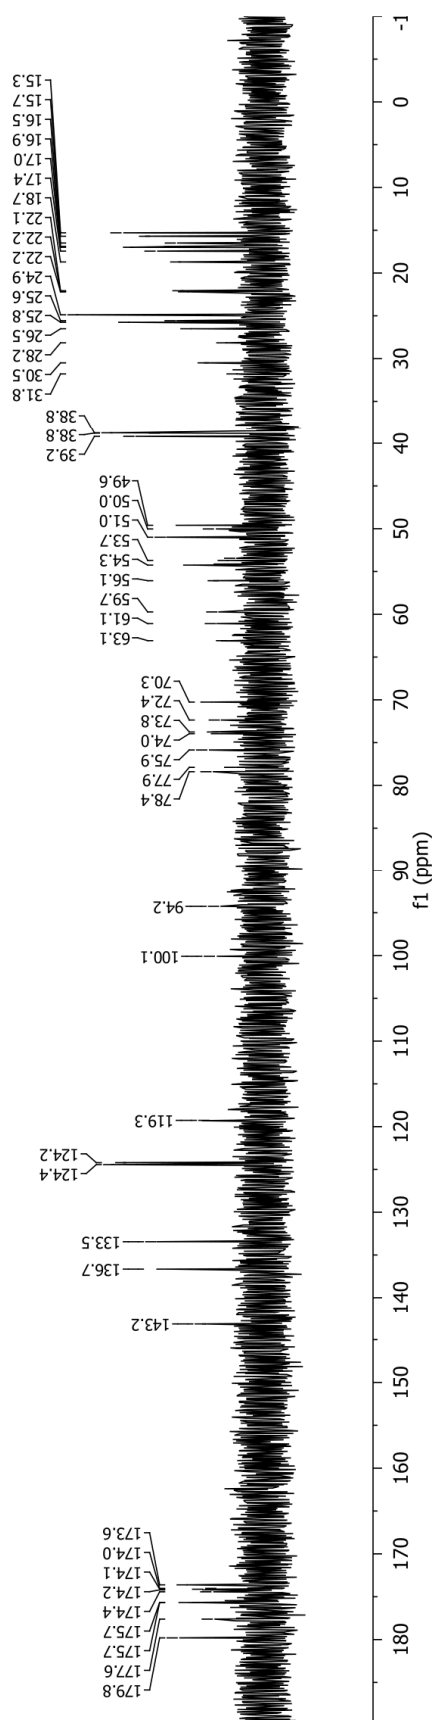

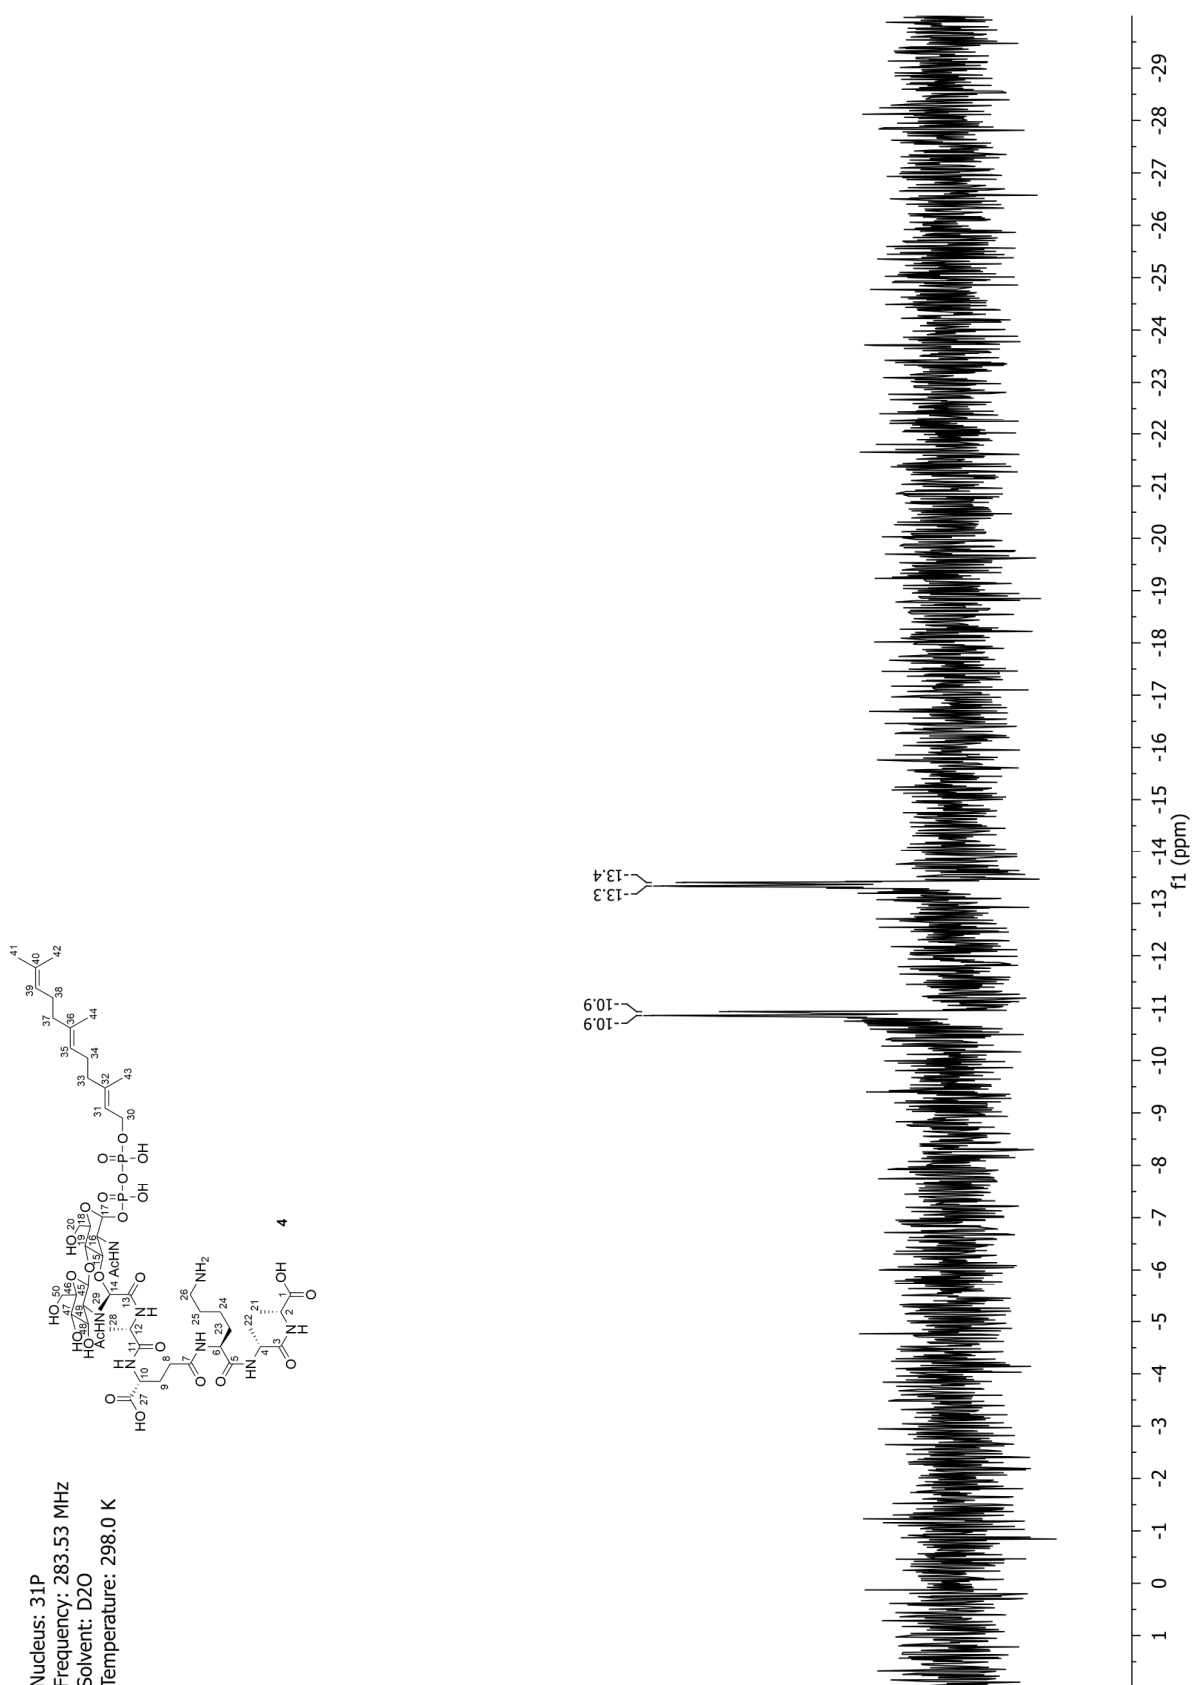

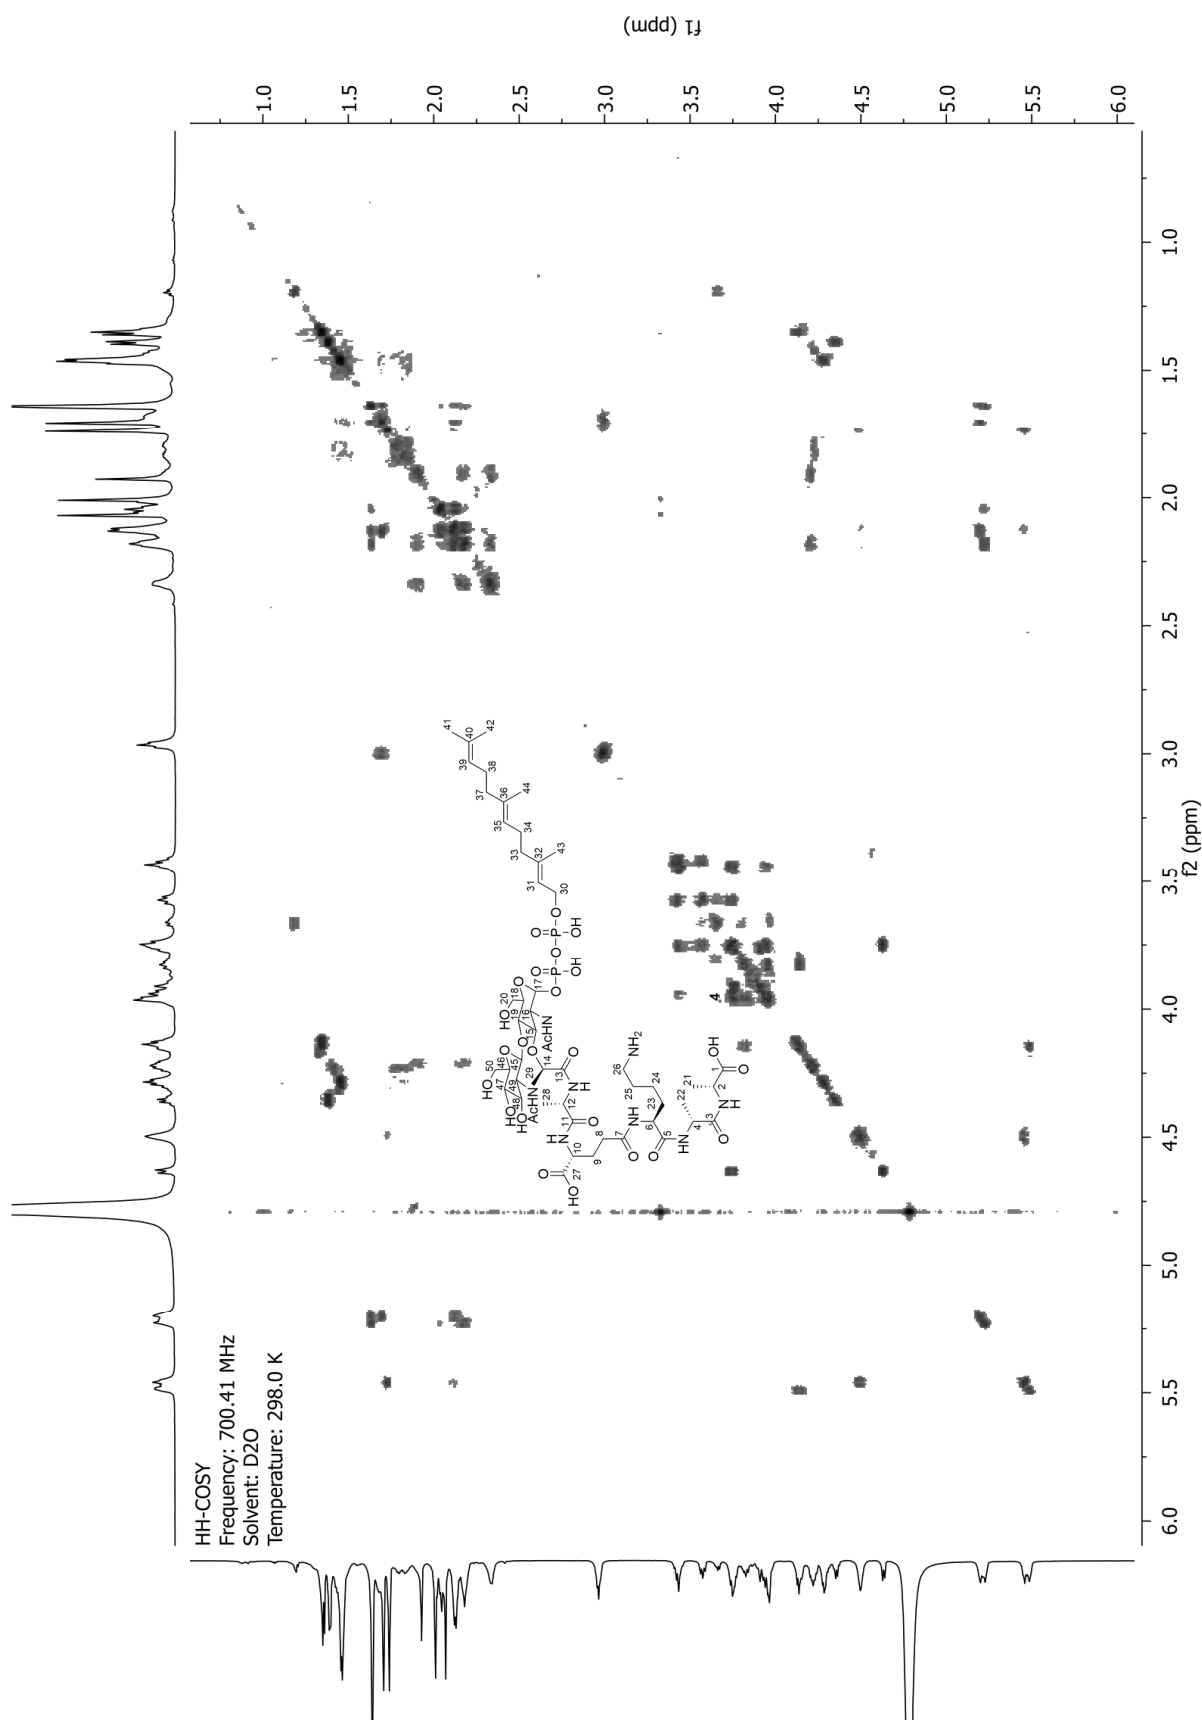



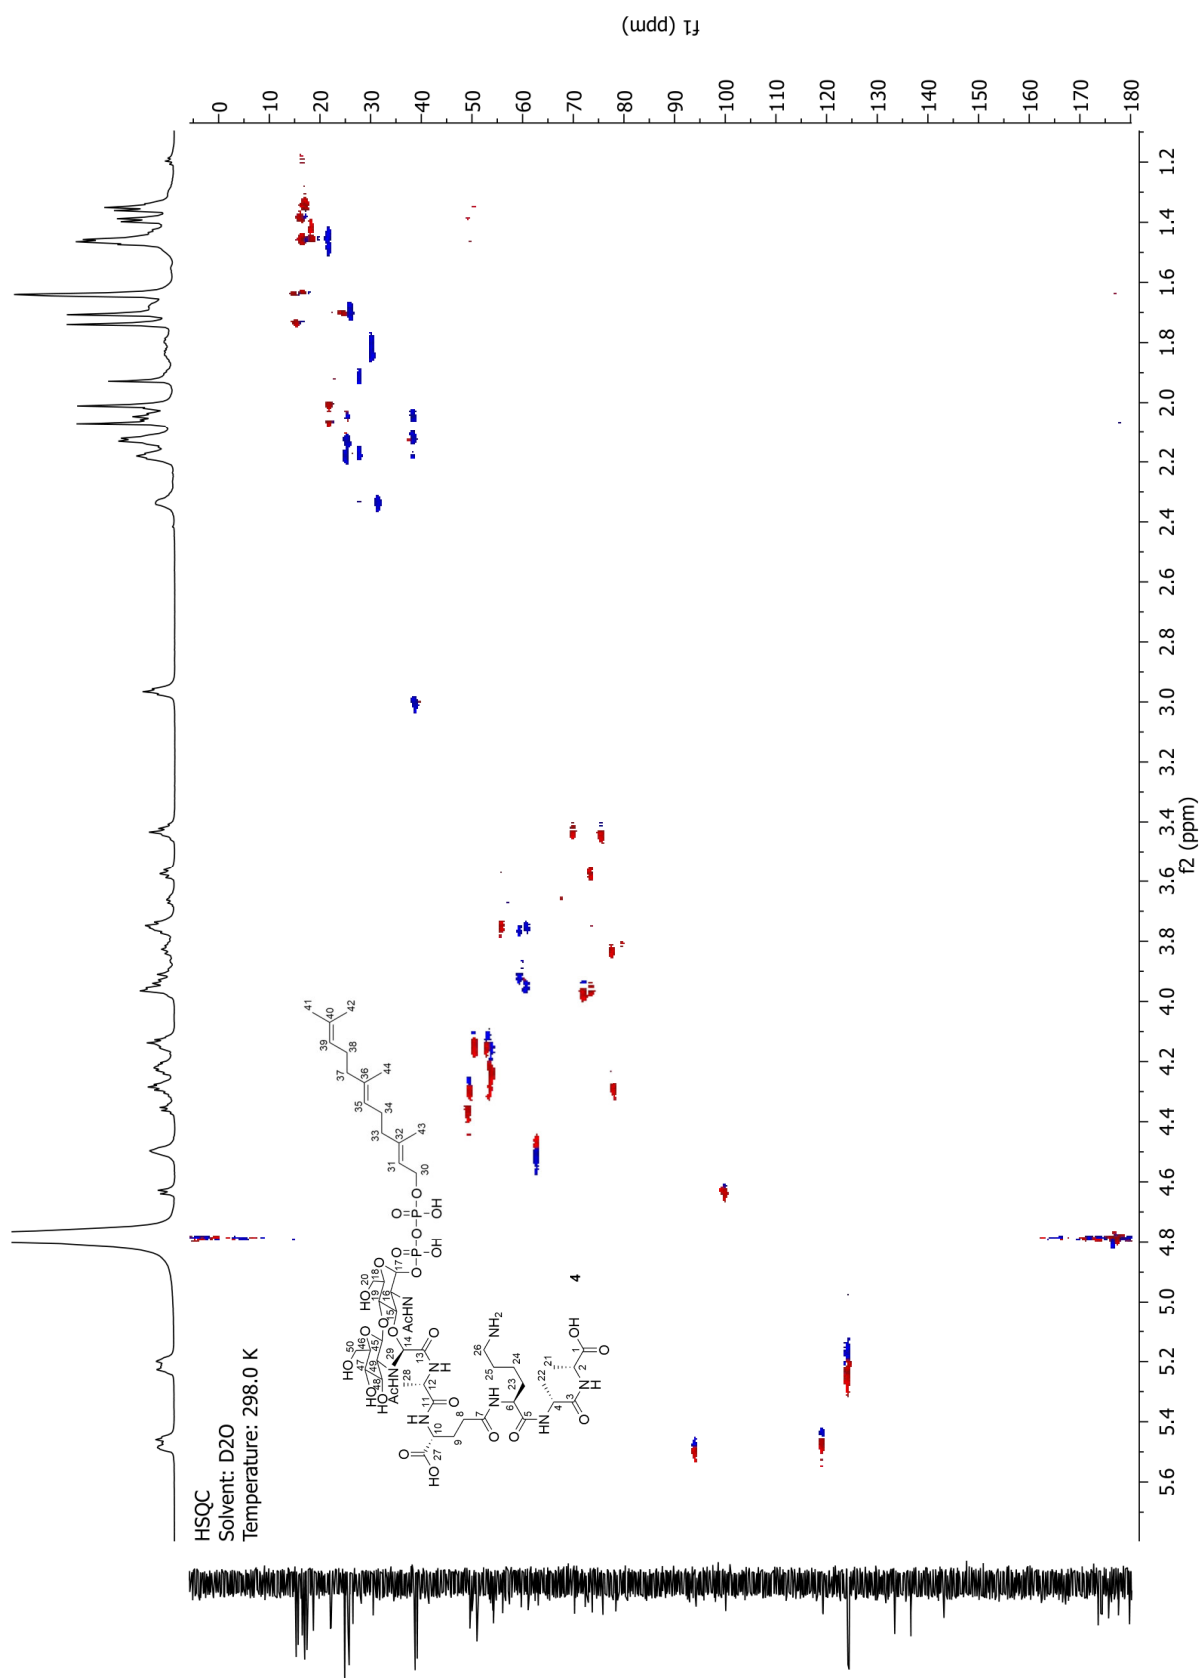

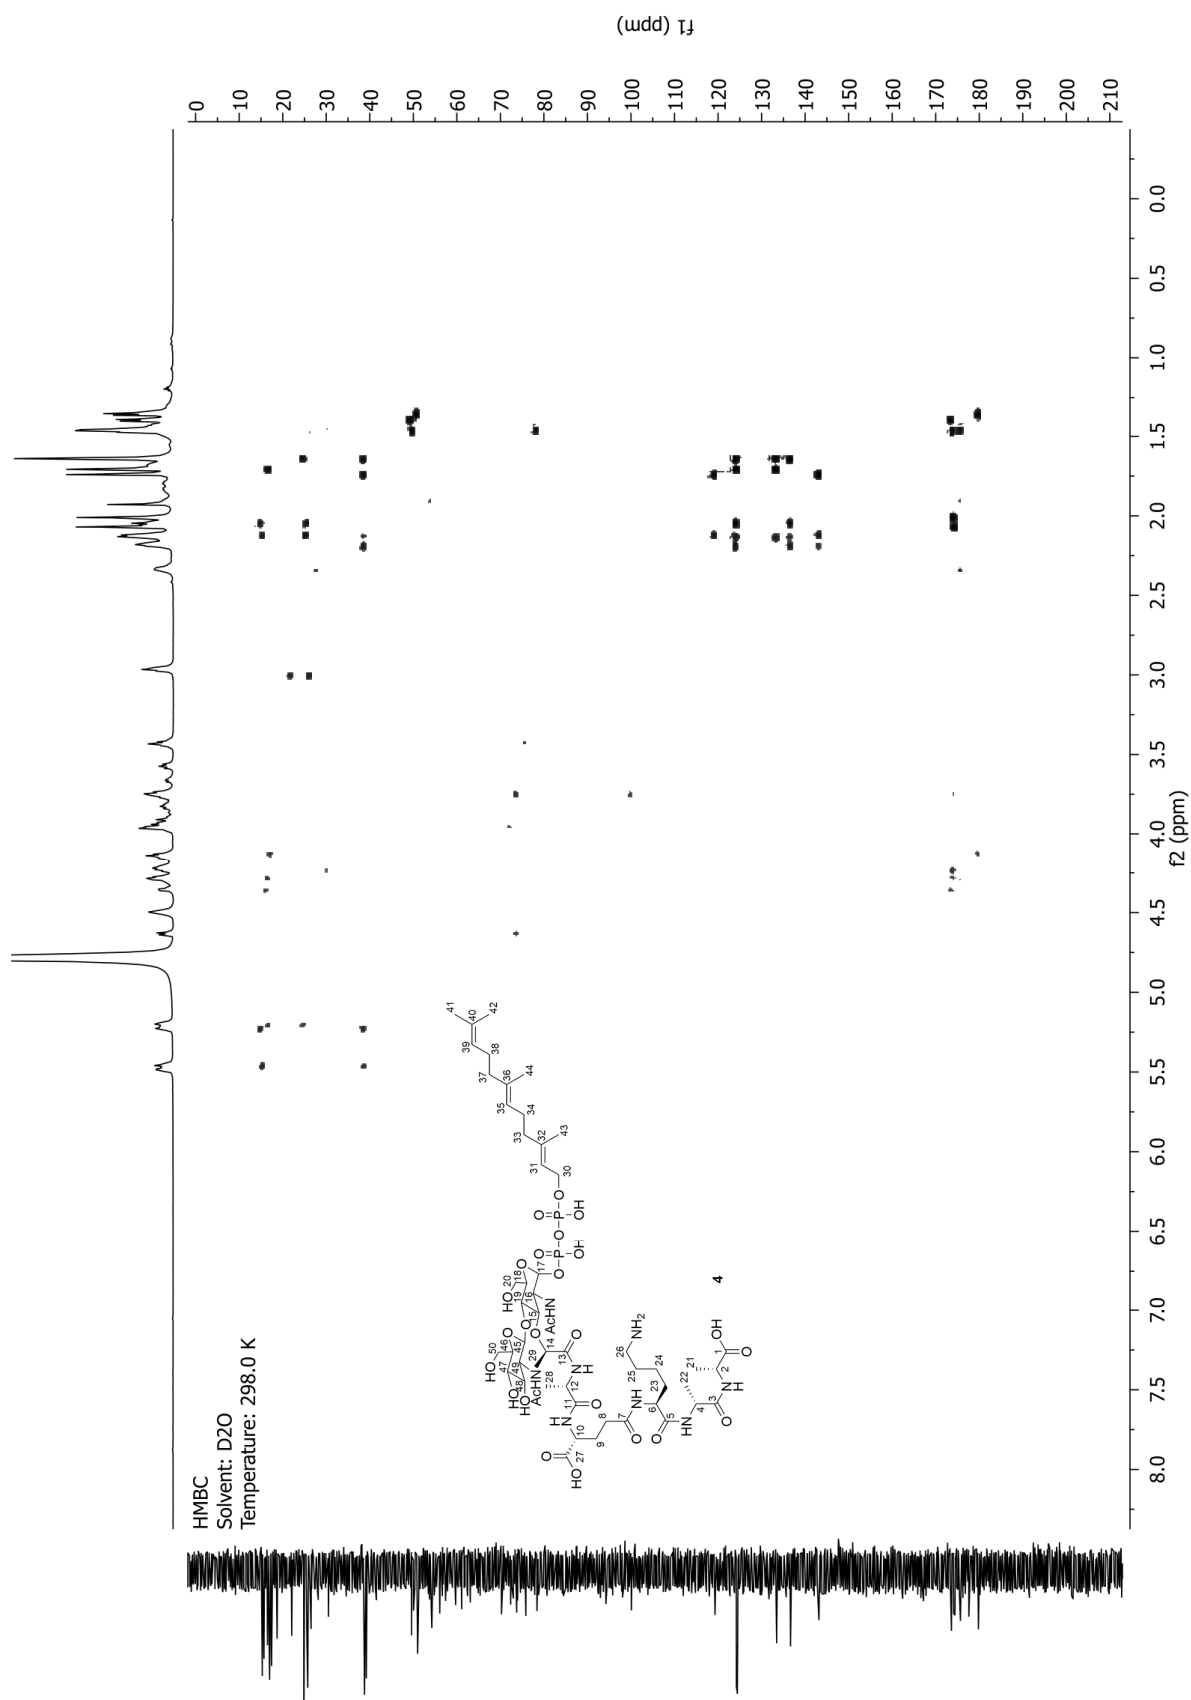

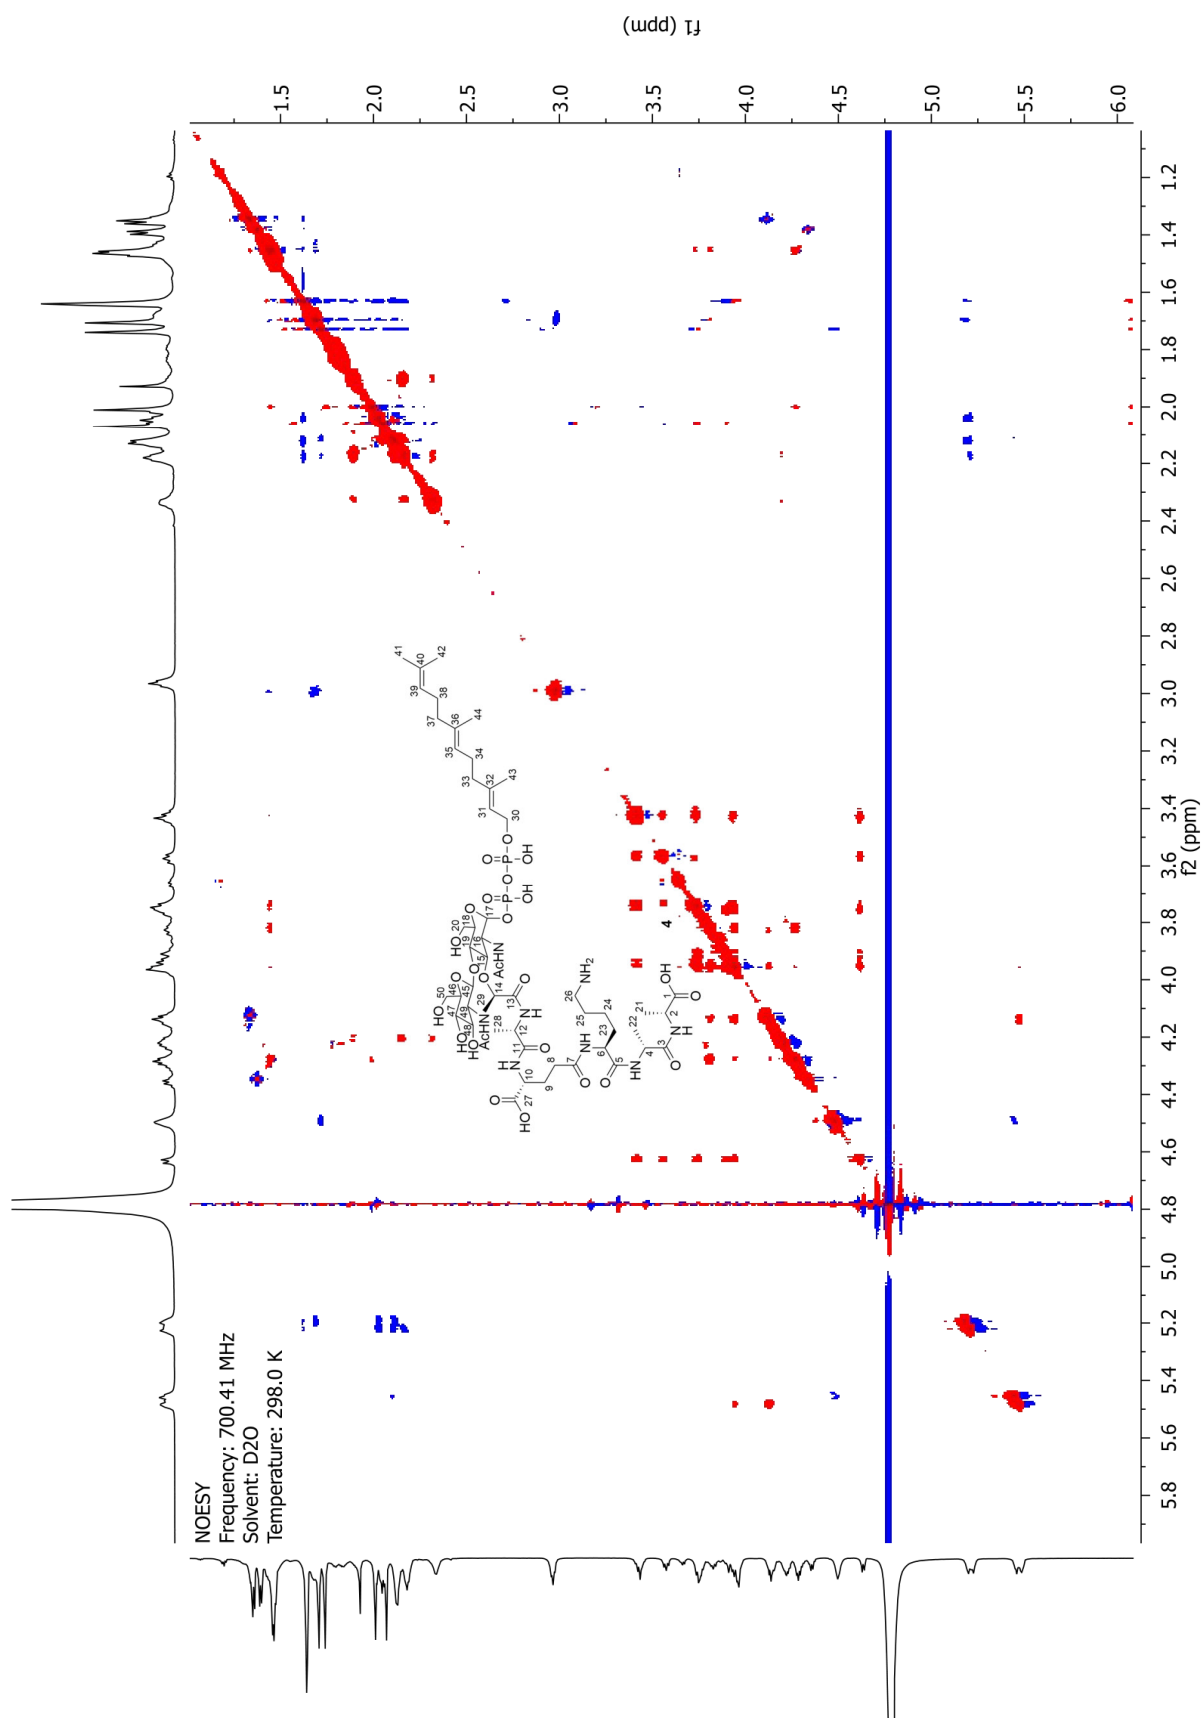

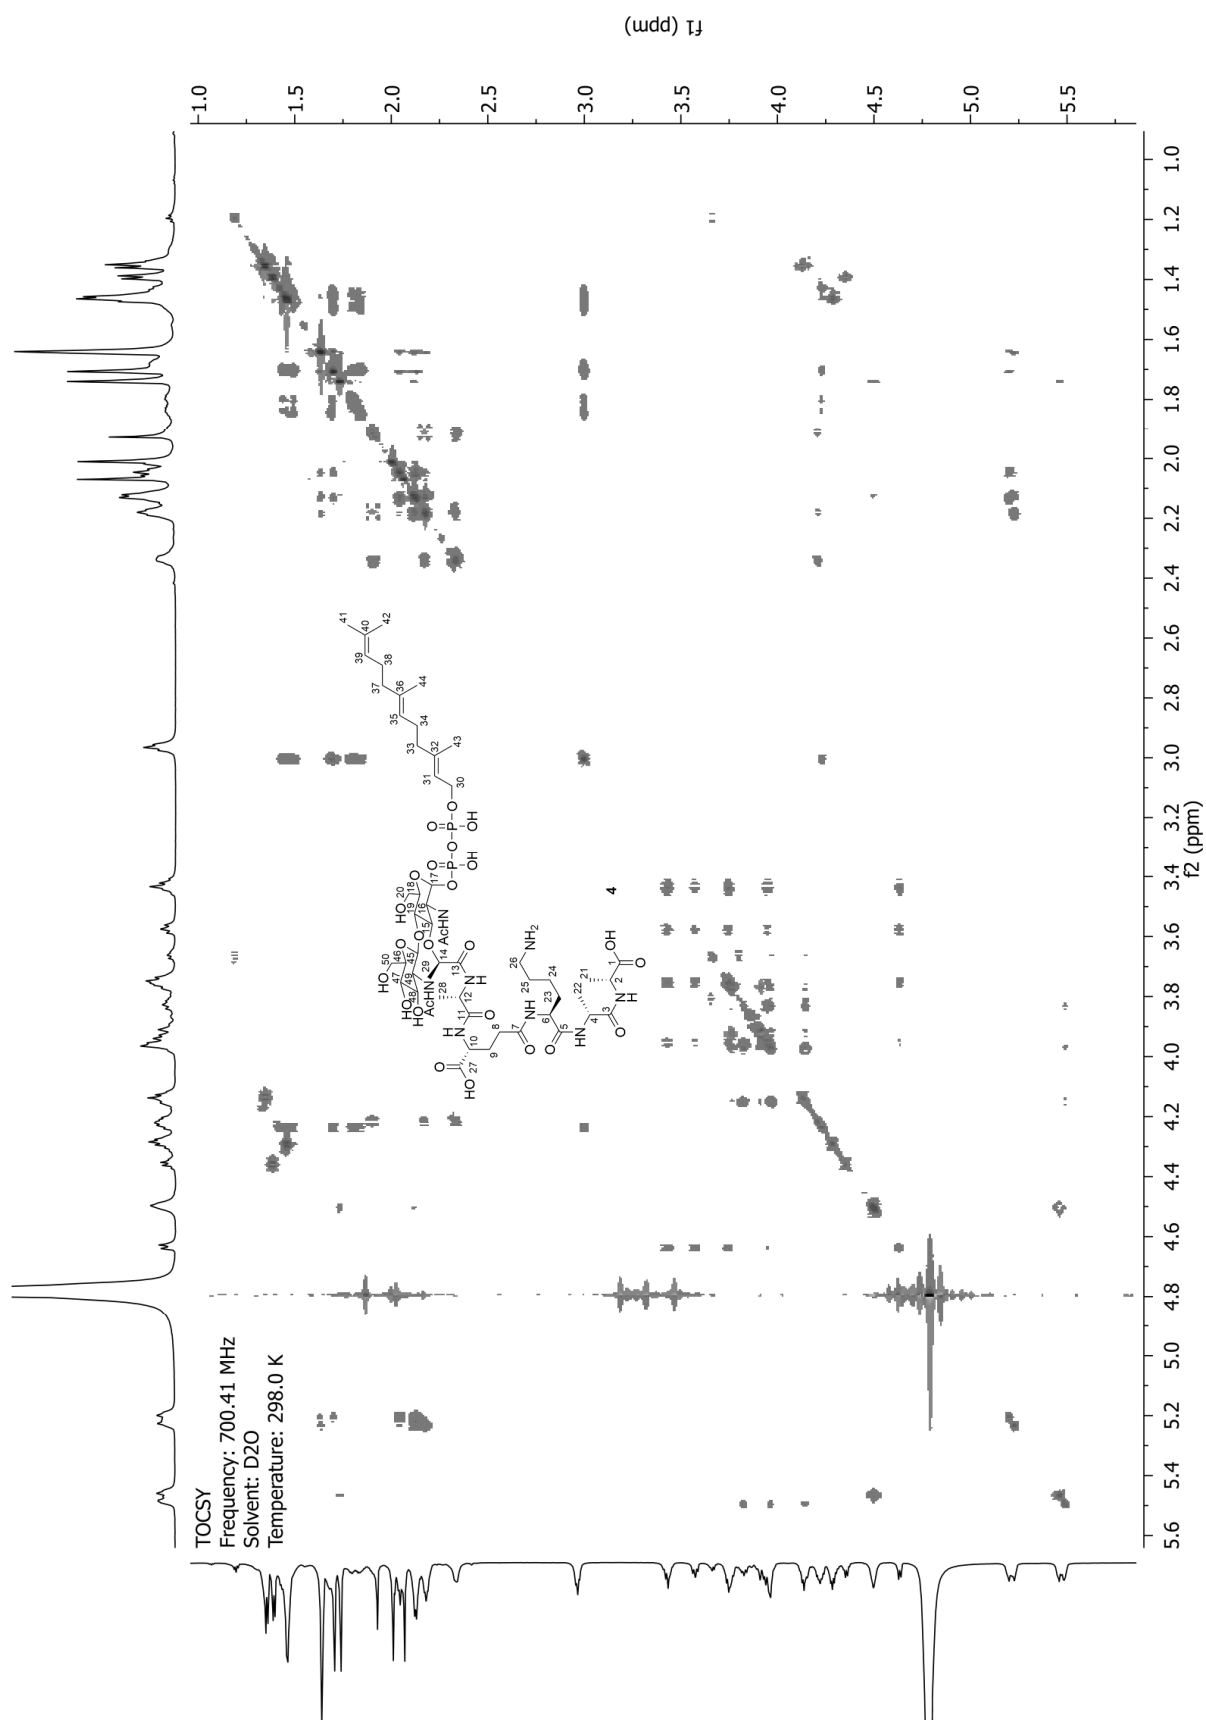

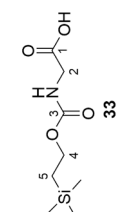

Nucleus:  $^1\text{H}$   
 Frequency: 500.14 MHz  
 Solvent: MeOD  
 Temperature: 298.0 K

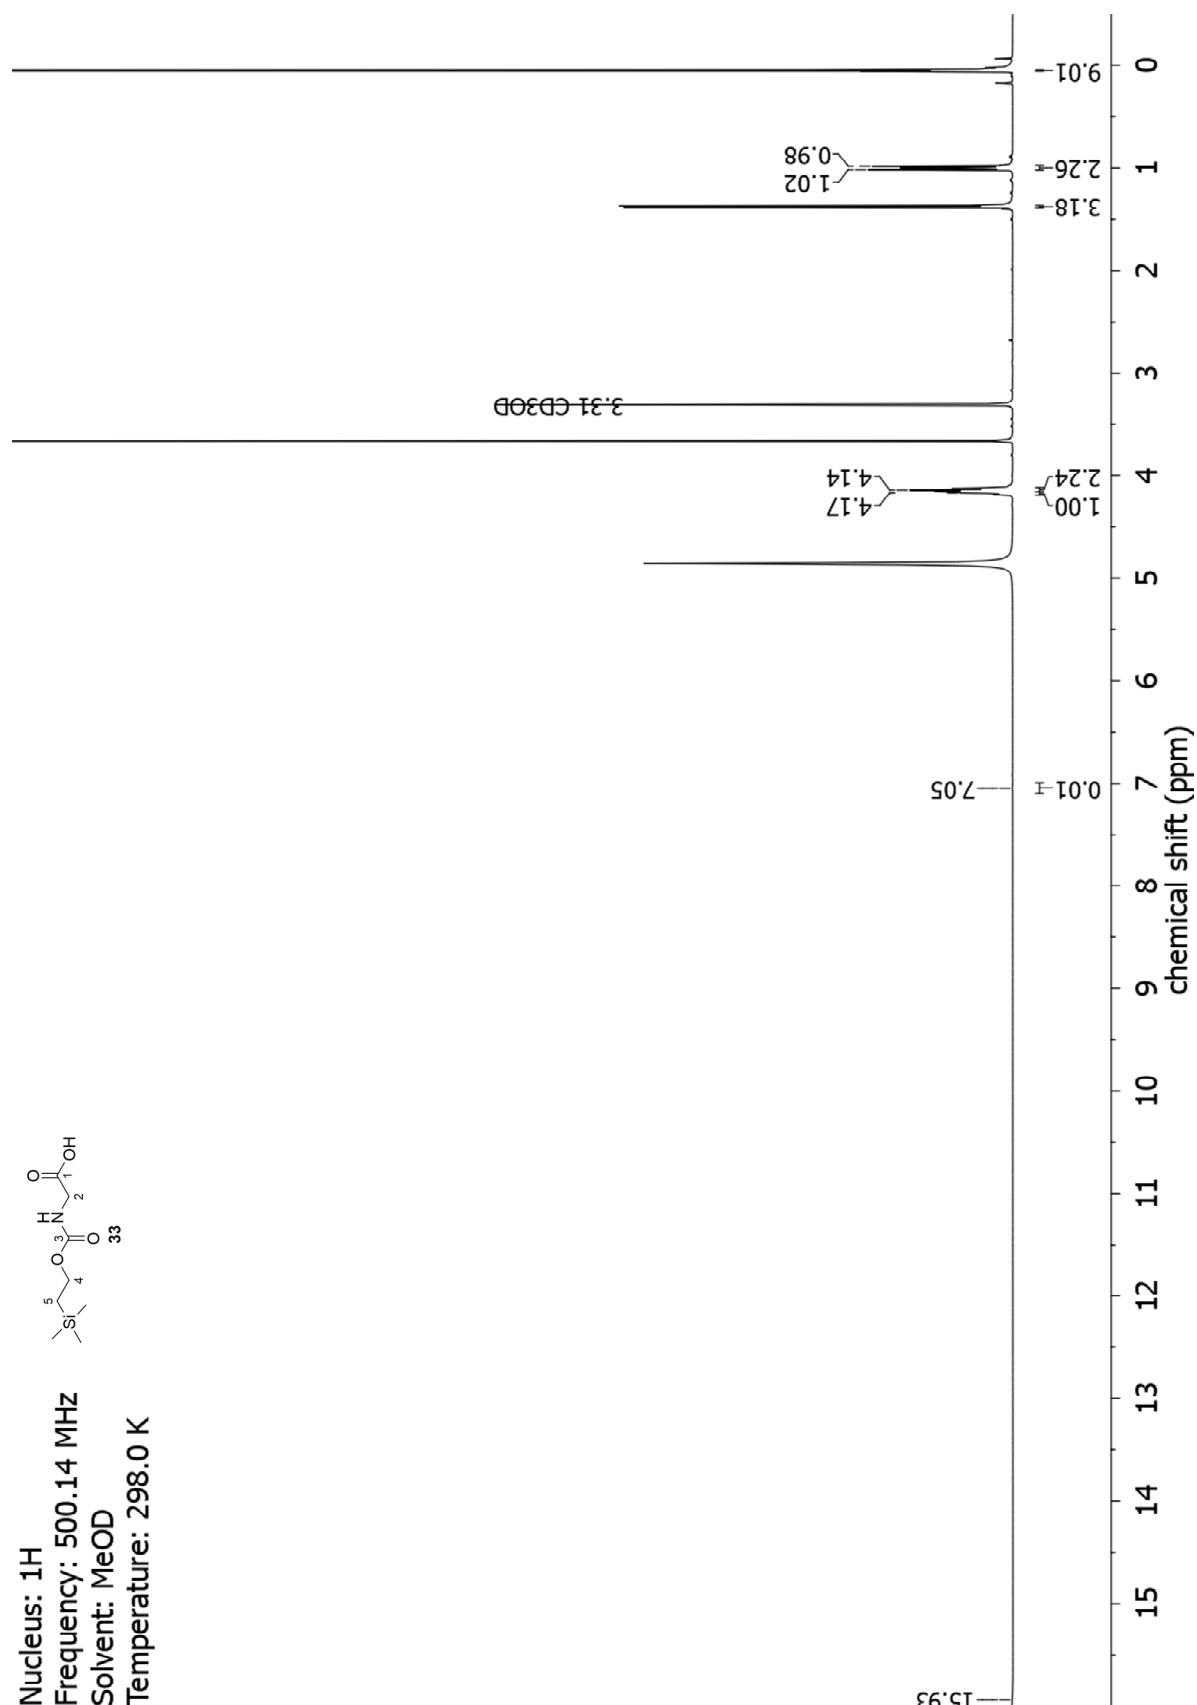

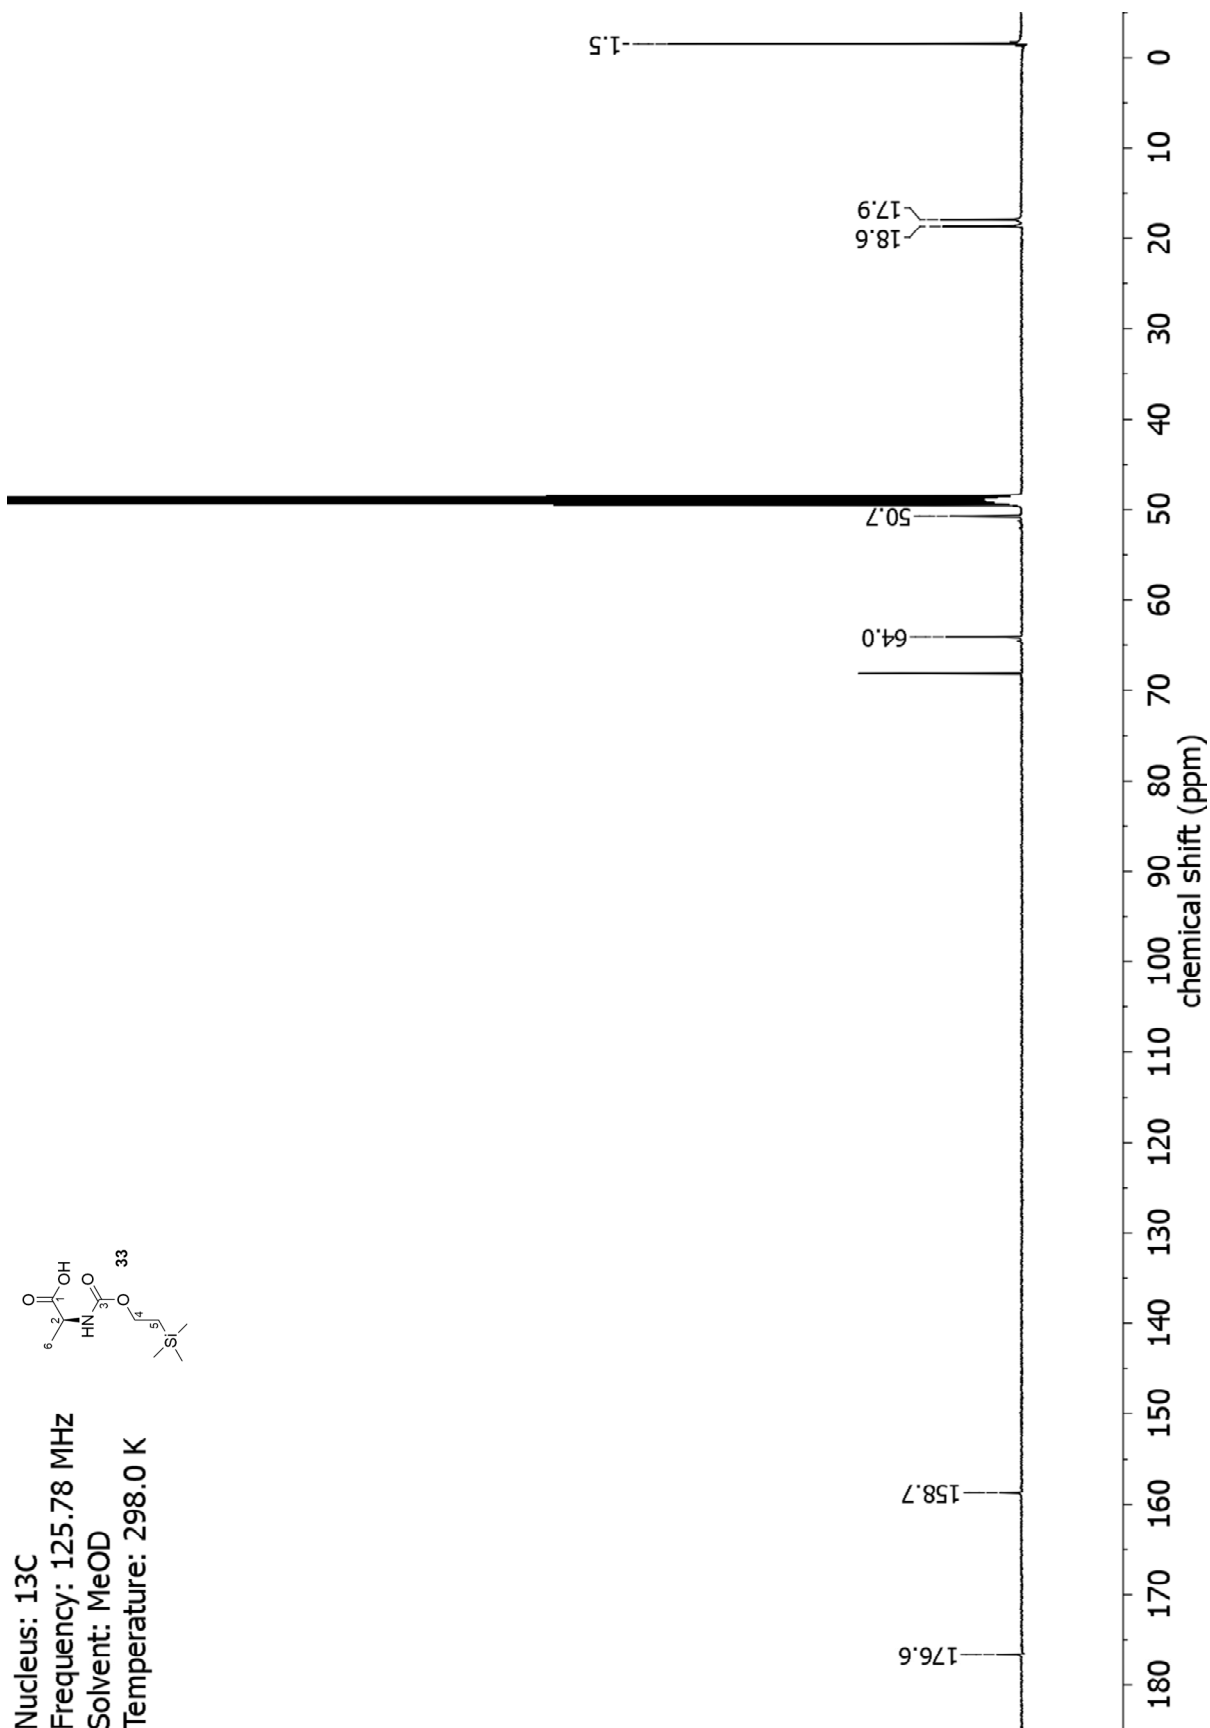

Nucleus:  $^1\text{H}$   
 Frequency: 700.41 MHz  
 Solvent: DMSO  
 Temperature: 298.0 K

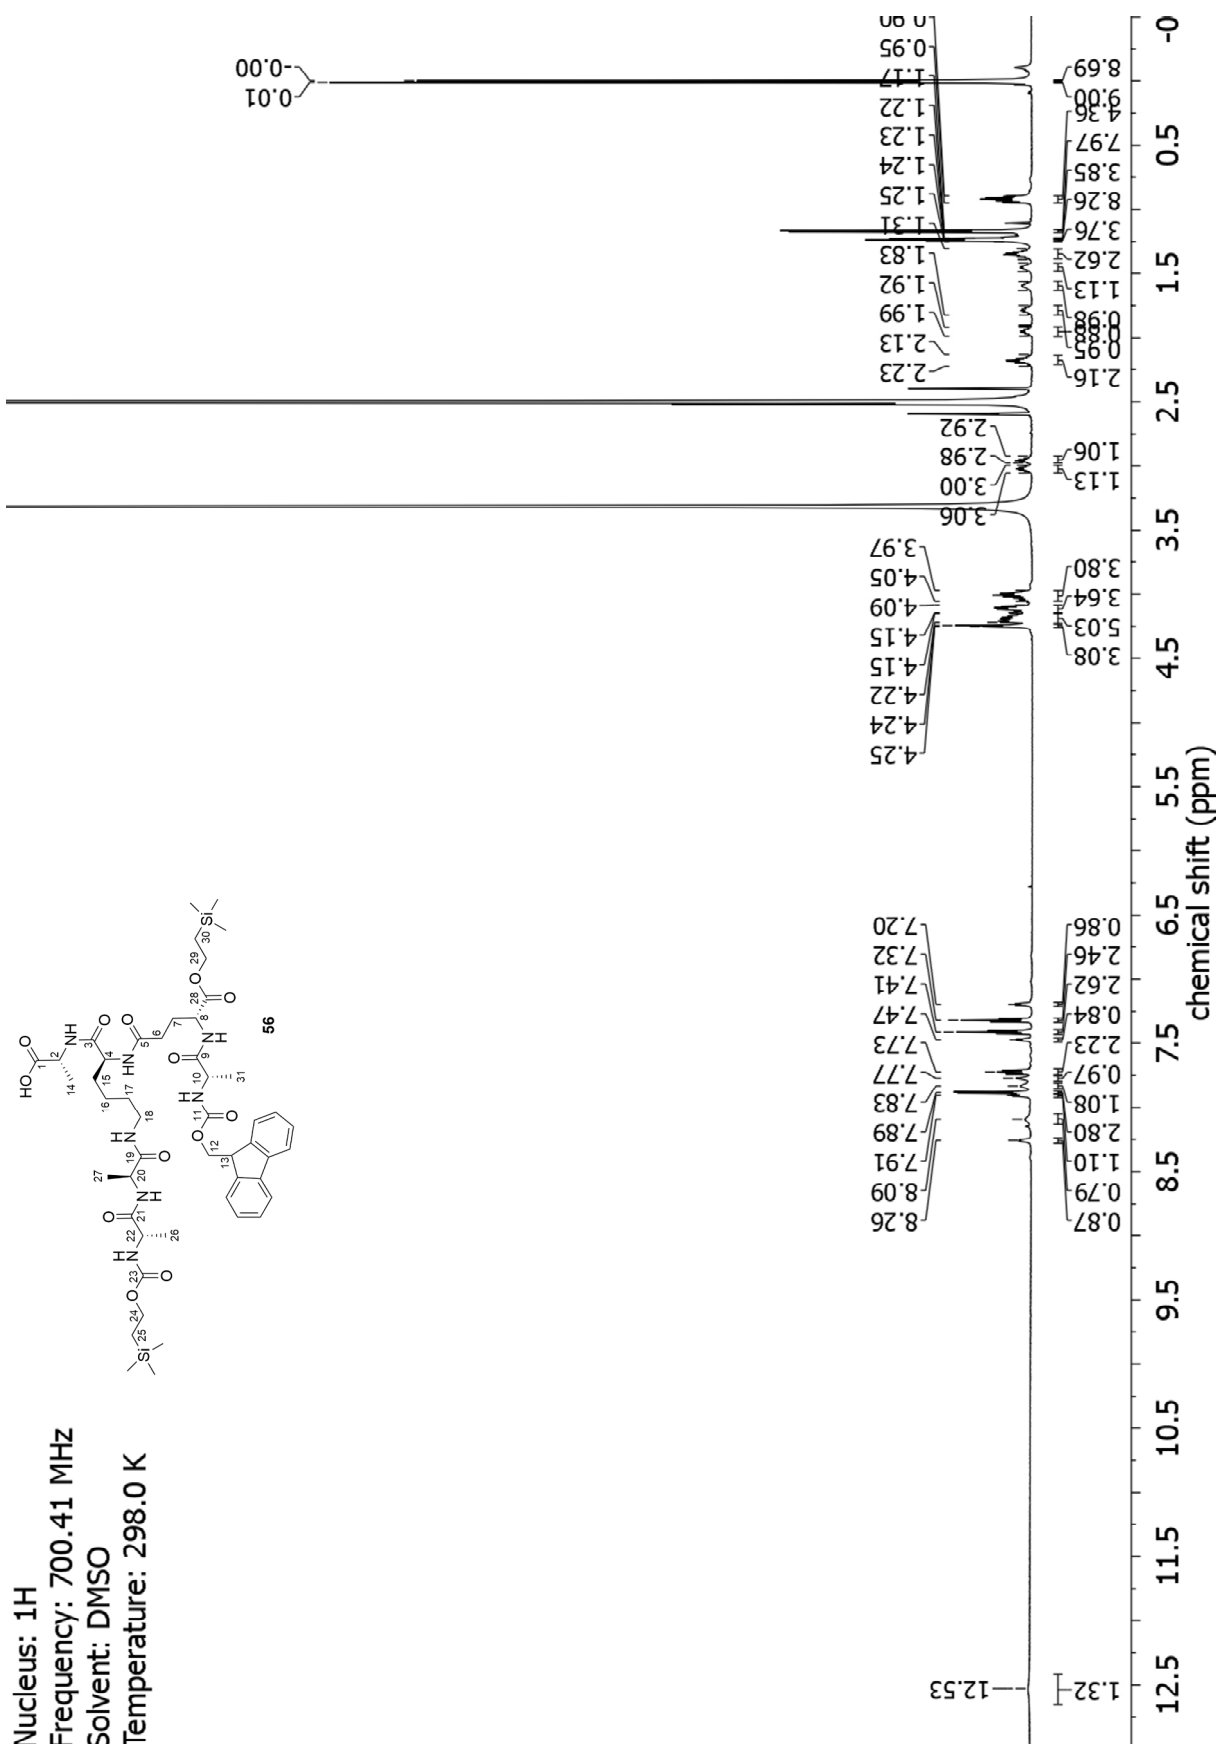

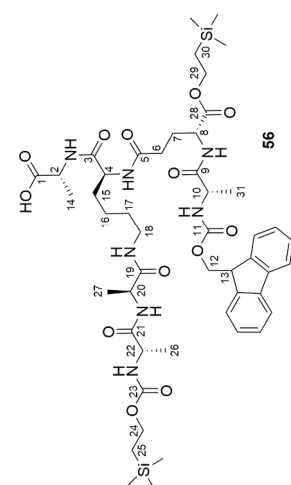

Nucleus:  $^{13}\text{C}$   
 Frequency: 176.14 MHz  
 Solvent: DMSO  
 Temperature: 298.0 K

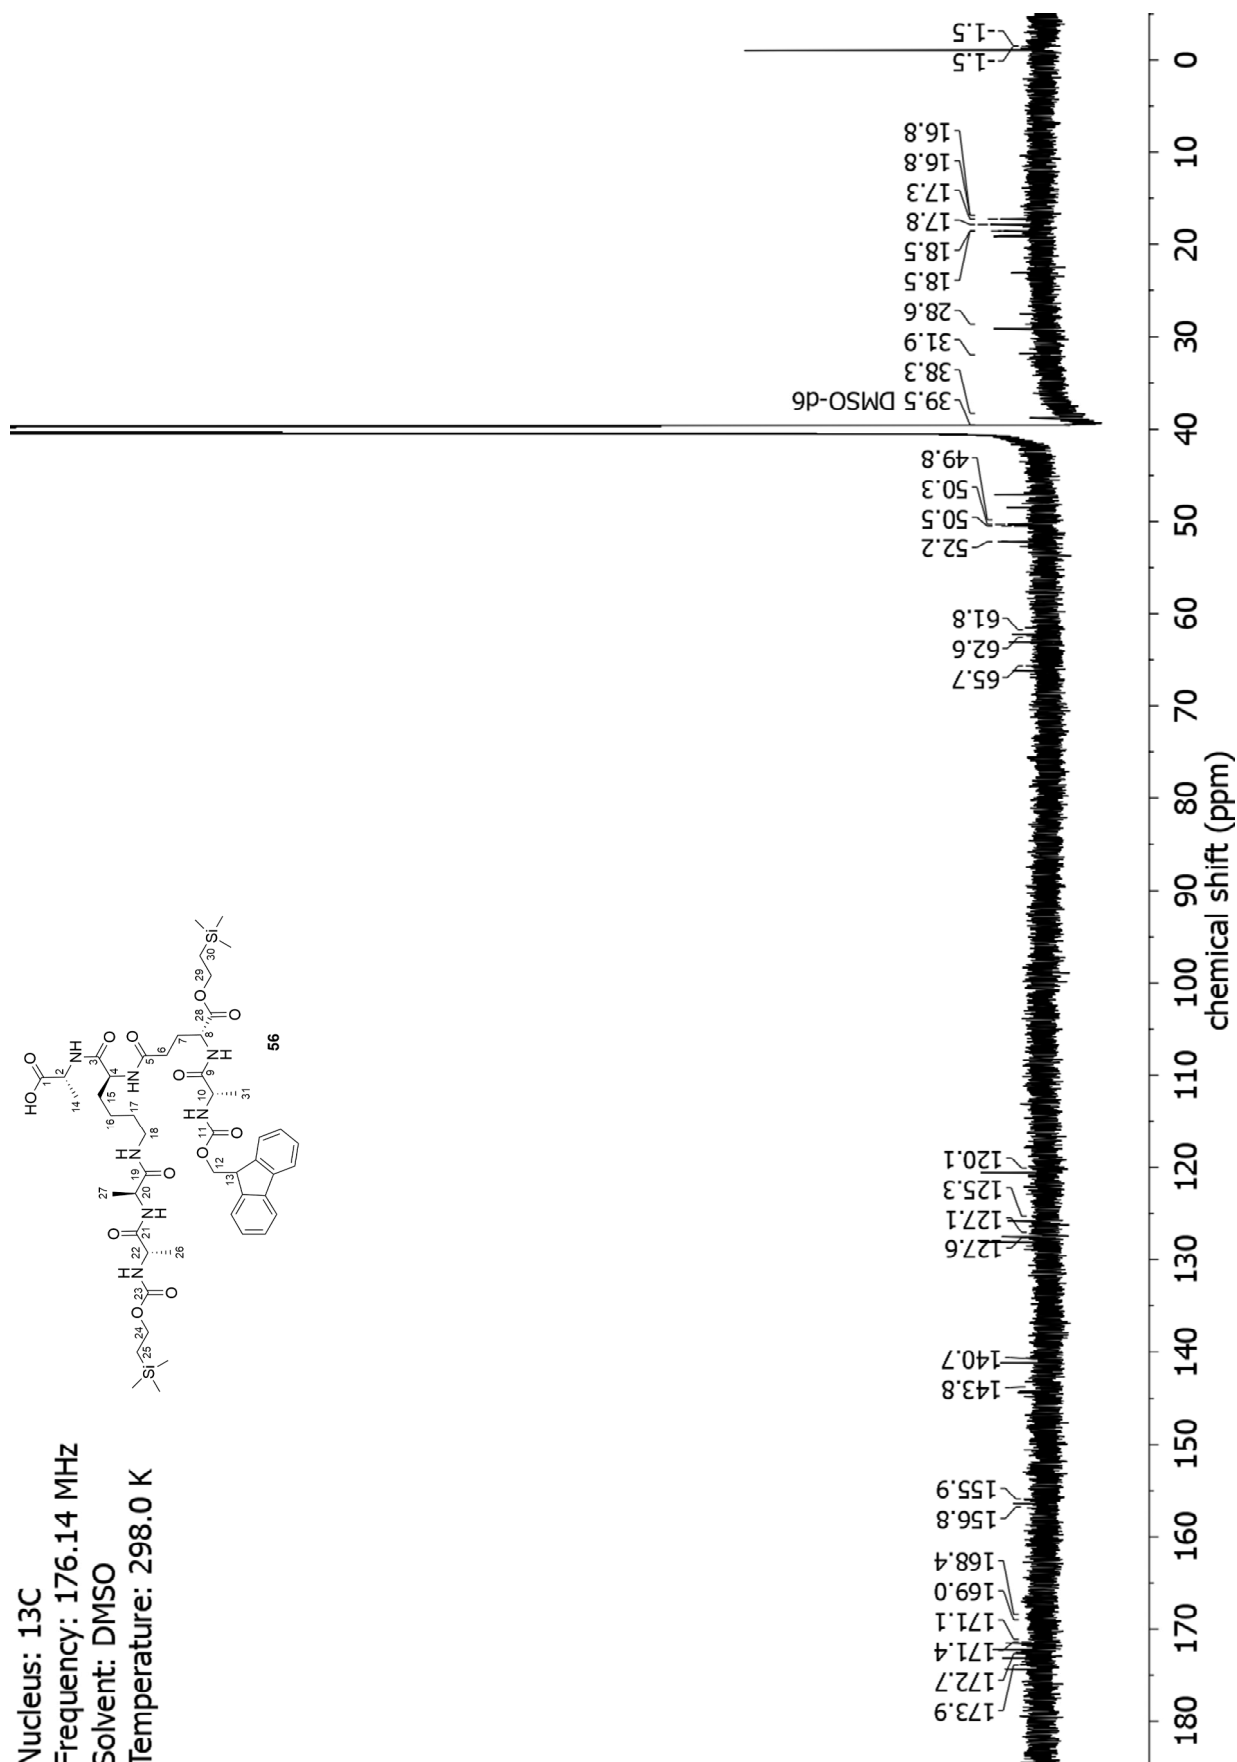



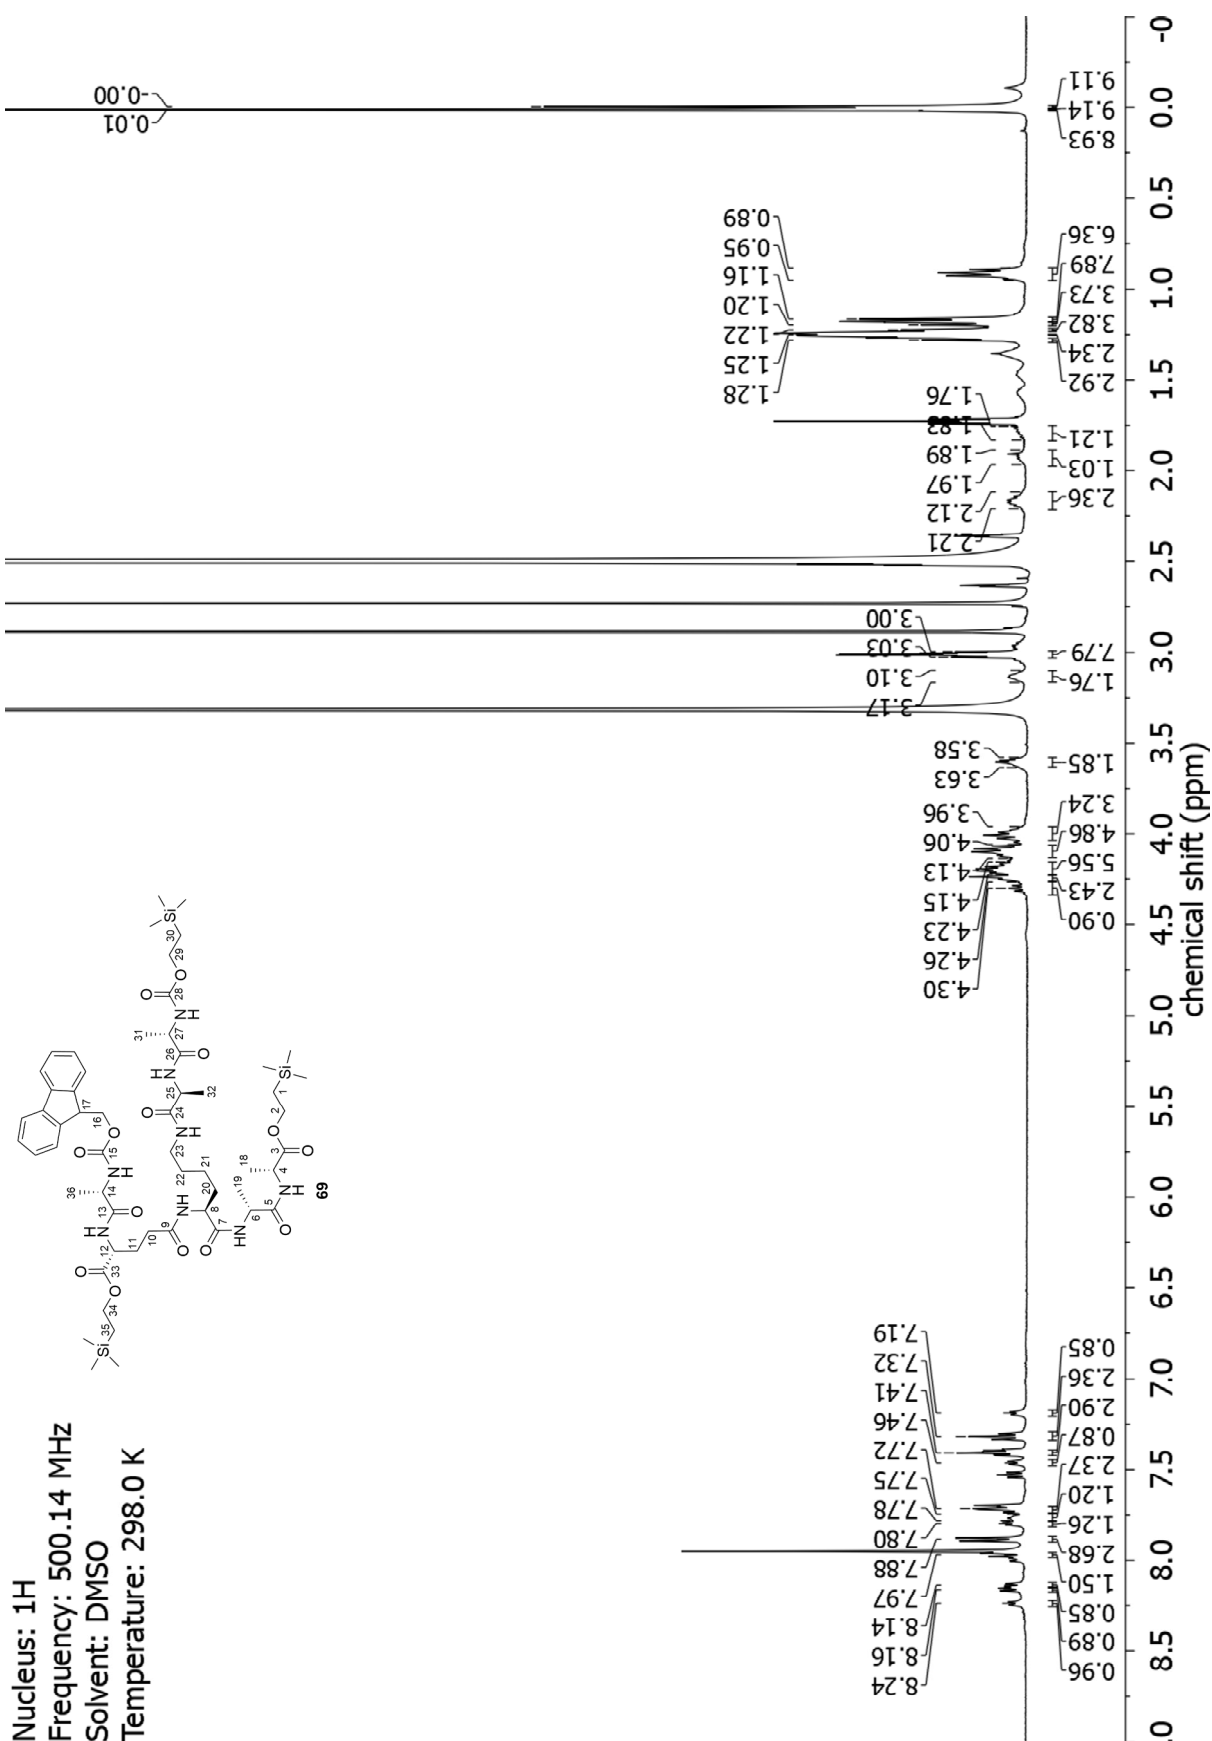

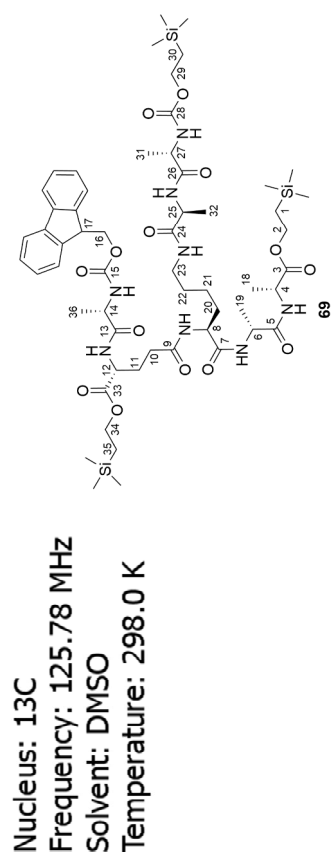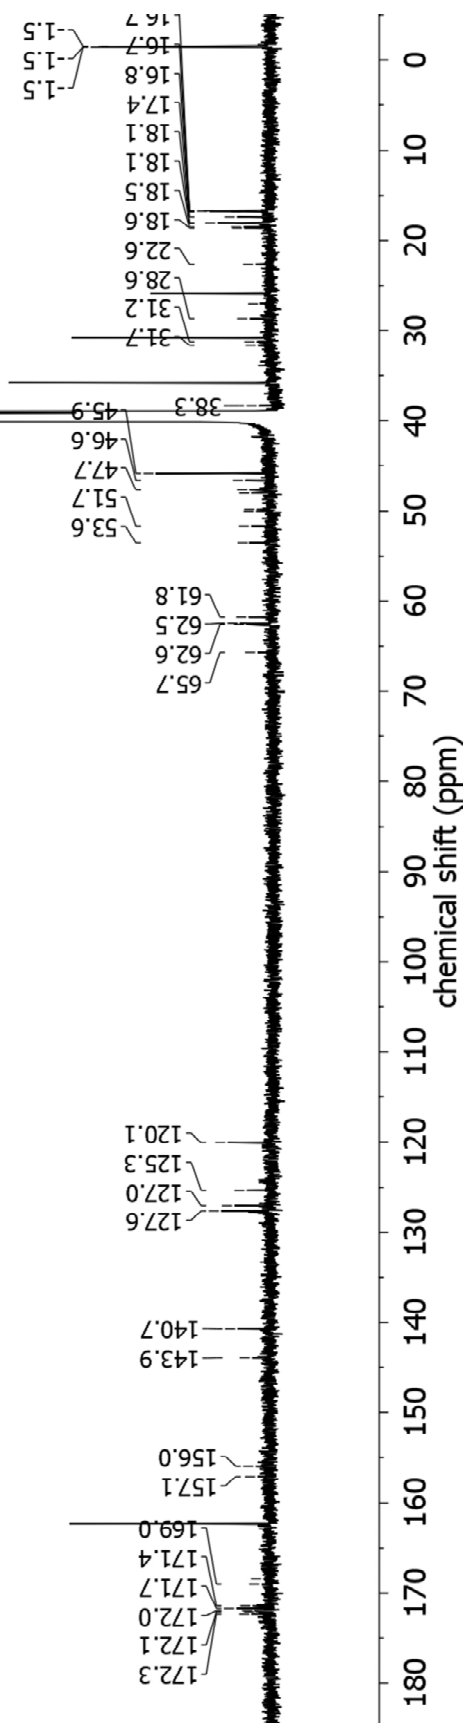

Frequency: 700.41 MHz

Solvent: DMSO

Temperature: 298.0 K

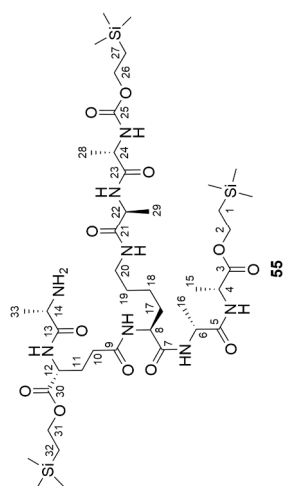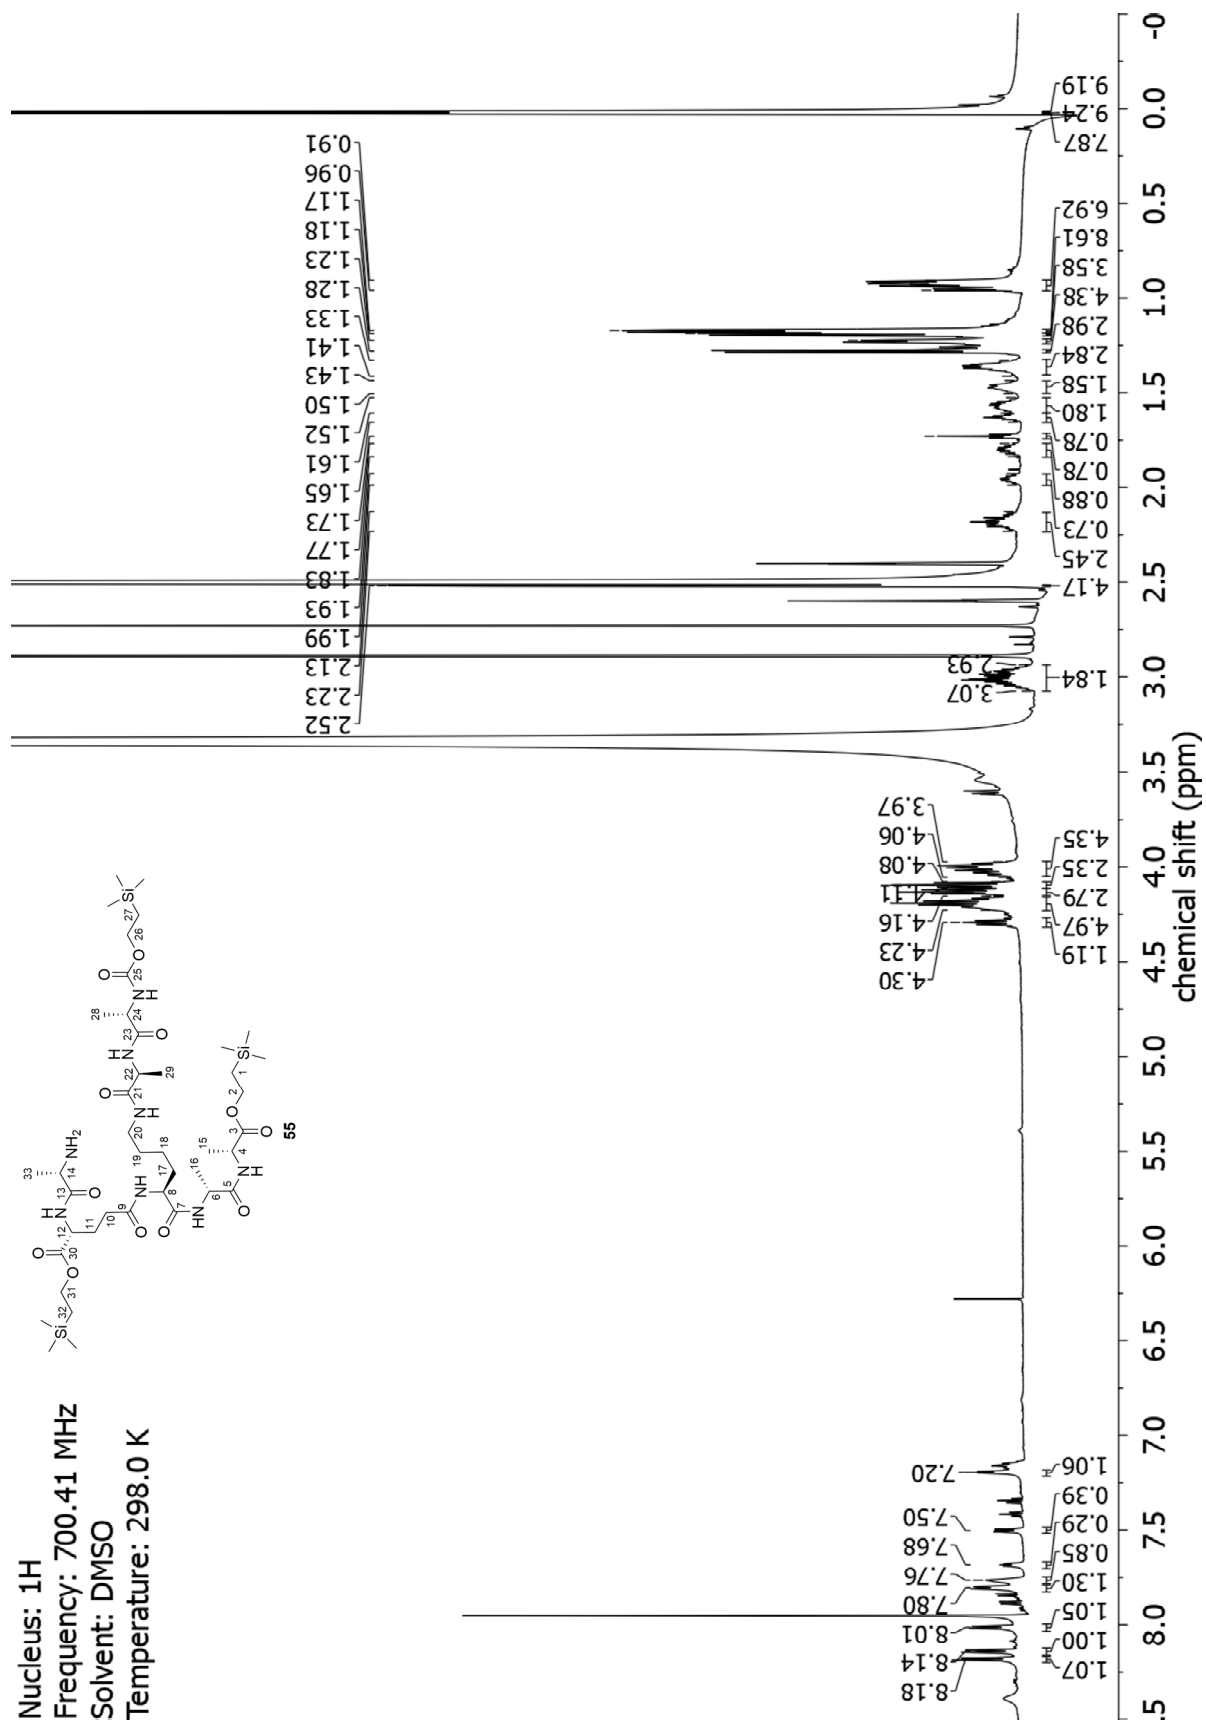

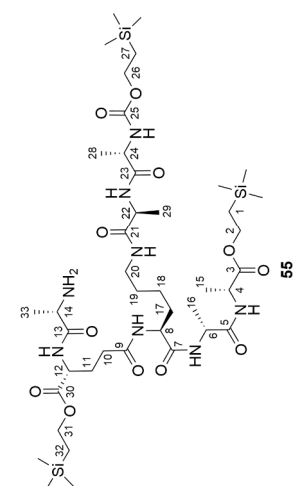

Nucleus:  $^{13}\text{C}$   
 Frequency: 176.14 MHz  
 Solvent: DMSO  
 Temperature: 298.0 K

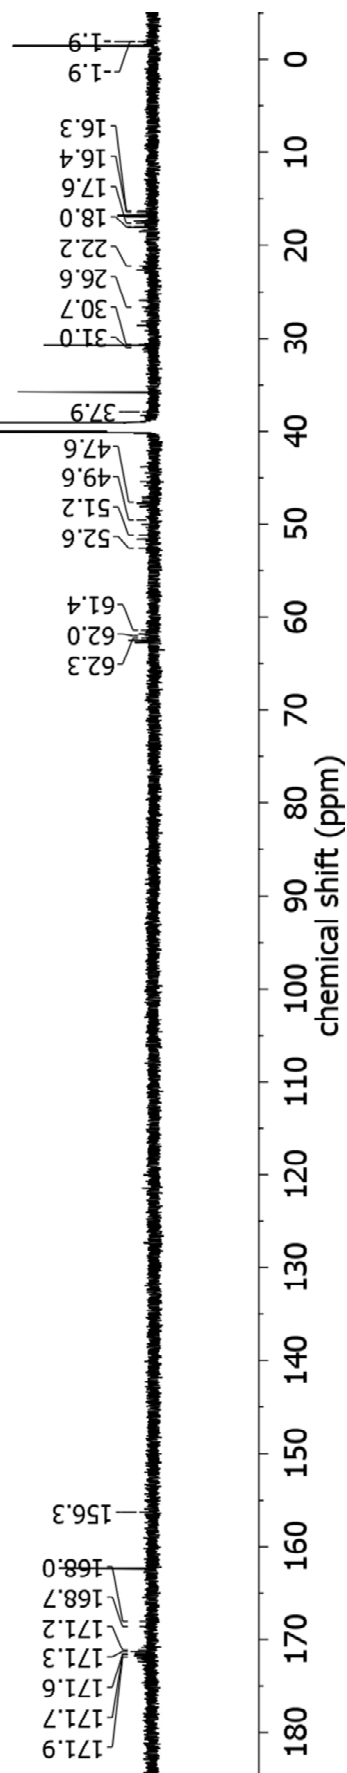

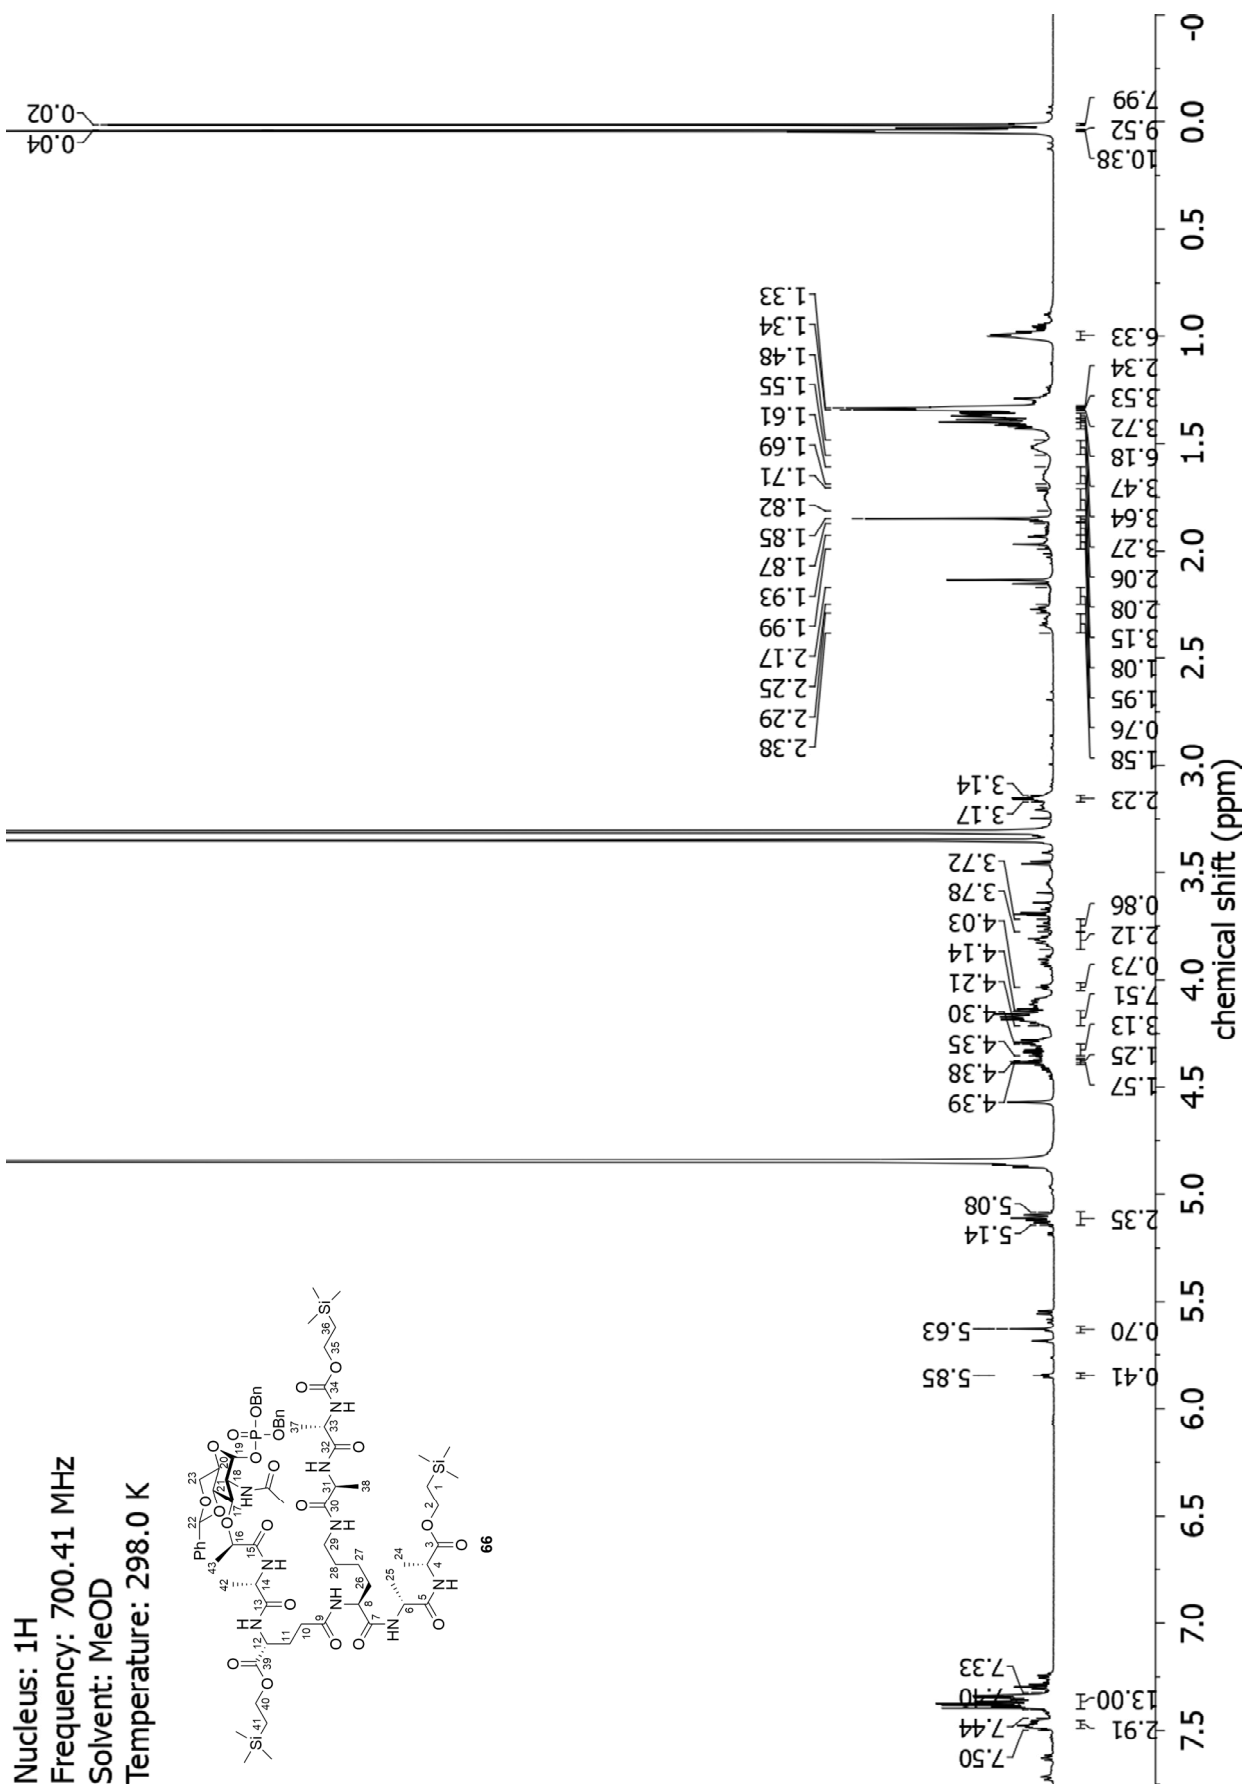

Nucleus:  $^{13}\text{C}$   
 Frequency: 176.14 MHz  
 Solvent: MeOD  
 Temperature: 298.0 K

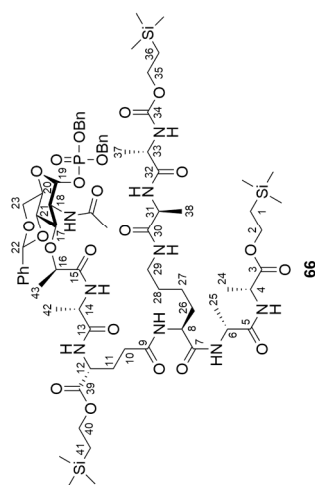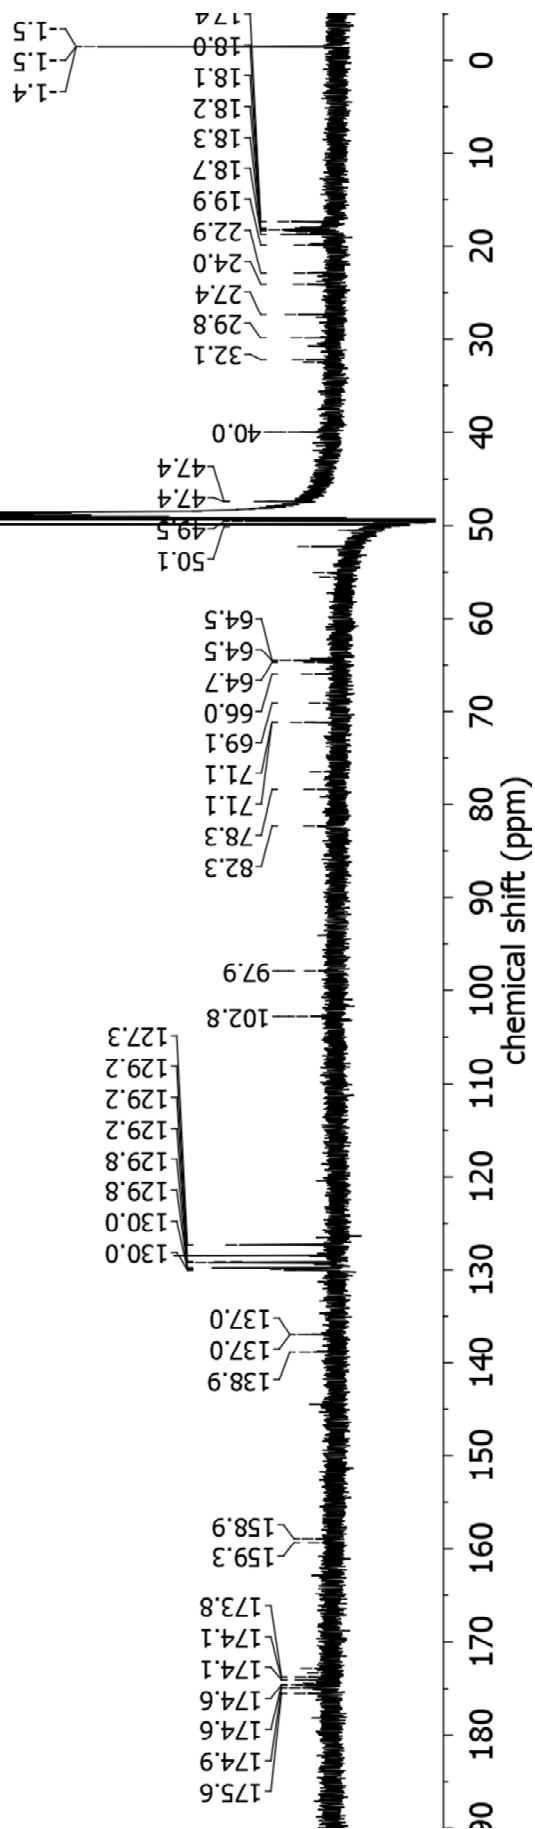

Supplement: d2ra01915a1.pdf [file d2ra01915a1.pdf]
